# Supplementary material for: Randomized controlled studies on the efficacy of antiarthritic agents in inhibiting cartilage degeneration and pain associated with progression of osteoarthritis in the rat
Source: PubMed Central journal article supplement (PMC4721142; doi:10.1186/s13075-016-0921-5), 2016-01-21
Supplement: 13075_2016_921_MOESM1_ESM.pdf [file 13075_2016_921_MOESM1_ESM.pdf]

## **SUPPLEMENT**

### **Randomized and controlled studies on the efficacy of anti-arthritic agents in inhibiting cartilage degeneration and pain associated with progression of osteoarthritis in the rat.**

Erica M. TenBroek<sup>1\*</sup>, Laurie Yunker<sup>1</sup>, Mae Foster Nies<sup>1</sup>, and Alison M. Bendele<sup>2</sup>

<sup>1</sup>These studies were conducted at Medtronic Inc., Ventures and New Therapies, Therapy, Research and Development 710 Medtronic Parkway, Fridley, MN 55432; <sup>2</sup>Bolder BioPATH, Inc. 5541 Central Ave Suite 160, Boulder, Colorado, 80301.

\*Author may be contacted through email at [tenbre1@comcast.net](mailto:tenbre1@comcast.net)

## Table of Contents

|                                                   |     |
|---------------------------------------------------|-----|
| I. Supplementary Methods                          | 7   |
| In Vivo Functional Testing                        | 7   |
| Monoiodoacetoacetate Model Trial 1                | 7   |
| Monoiodoacetoacetate Model Trial 2                | 8   |
| Monoiodoacetoacetate Model Trial 3                | 9   |
| Meniscal Tear Model Trial 1                       | 9   |
| Meniscal Tear Model Trial 2                       | 9   |
| Histopathology                                    | 10  |
| Monoiodoacetoacetate Model                        | 10  |
| Medial Meniscal Tear Model                        | 11  |
| Micro CT                                          | 13  |
| II. Supplementary Results                         | 16  |
| In Vitro NF- $\kappa$ B Activity                  | 17  |
| In Vitro Osteoclastogenesis                       | 17  |
| In Vitro MMP-13 Activity                          | 27  |
| In Vitro Synovial Toxicity                        | 36  |
| In Vitro Chondrocyte Toxicity                     | 45  |
| In Vitro Hela Cell Drug Toxicity Testing          | 47  |
| Toxicity and Efficacy: Comparison of Test Results | 48  |
| In Vivo Testing of Osteoarthritic Animals         | 52  |
| MIA Model Functional Assessment                   | 55  |
| MIA Model Histopathology Results                  | 70  |
| MMT/MCLT Model Functional Assessment              | 98  |
| MMT/MCLT Model Histopathology Results             | 104 |
| Appendix – Individual Animal Data.....            | 118 |

## Tables

|                                                                                                                    |    |
|--------------------------------------------------------------------------------------------------------------------|----|
| Table 1 – Example of a histopathology report for an individual animal.                                             | 15 |
| Table 2 – Example of calculated histopathological degeneration for an individual animal                            | 15 |
| Table 3- Drug toxicity measured using a CTG assay and HeLa cells.                                                  | 50 |
| Table 4. Comparison of screening results for various drugs.                                                        | 51 |
| Table 5. Percent area chondrocyte necrosis / proteoglycan degeneration MIA Trial 1                                 | 70 |
| Table 6. Average percent area chondrocyte necrosis / proteoglycan degeneration MIA Trial 1                         | 70 |
| Table 7. Unmasked individual animal histopathological data for each treatment in MIA Trial 1                       | 71 |
| Table 8. Histopathological analysis of proteoglycan and matrix loss in Vehicle Controls in MIA Trial 2.            | 79 |
| Table 9. Histopathological analysis of cartilage, bone, and synovium in Vehicle Controls in MIA Trial 2.           | 79 |
| Table 10. Histopathological analysis of proteoglycan and matrix loss in Tacrolimus-treated animals in MIA Trial 2. | 79 |

|                                                                                                                       |     |
|-----------------------------------------------------------------------------------------------------------------------|-----|
| Table 11. Histopathological analysis of cartilage, bone, and synovium in Tacrolimus-treated animals in MIA Trial 2.   | 80  |
| Table 12. Histopathological analysis of proteoglycan and matrix loss in Tacrolimus-treated animals in MIA Trial 2.    | 80  |
| Table 13. Histopathological analysis of cartilage, bone, and synovium in Tacrolimus-treated animals in MIA Trial 2.   | 80  |
| Table 14. Histopathological analysis of proteoglycan and matrix loss in Curcumin-treated animals in MIA Trial 2.      | 80  |
| Table 15. Histopathological analysis of cartilage, bone, and synovium in Curcumin-treated animals in MIA Trial 2.     | 81  |
| Table 16. Histopathological analysis of proteoglycan and matrix loss in Fluocinolone-treated animals in MIA Trial 2.  | 81  |
| Table 17. Histopathological analysis of cartilage, bone, and synovium in Fluocinolone-treated animals in MIA Trial 2. | 81  |
| Table 18. Histopathological analysis of proteoglycan and matrix loss in Clonidine-treated animals in MIA Trial 2.     | 82  |
| Table 19. Histopathological analysis of cartilage, bone, and synovium in Clonidine-treated animals in MIA Trial 2     | 82  |
| Table 20. Histopathological analysis of proteoglycan and matrix loss in Vehicle Controls.                             | 82  |
| Table 21. Histopathological analysis of cartilage, bone, and synovium in Vehicle Controls                             | 83  |
| Table 22. Histopathological analysis of proteoglycan and matrix loss in Clonidine-treated animals.                    | 83  |
| Table 23. Histopathological analysis of cartilage, bone, and synovium in Clonidine-treated animals.                   | 84  |
| Table 24. Histopathological analysis of proteoglycan and matrix loss in Tacrolimus-treated animals.                   | 84  |
| Table 25. Histopathological analysis of cartilage, bone, and synovium in Tacrolimus-treated animals.                  | 85  |
| Table 26. Histopathological analysis of proteoglycan and matrix loss in Fluocinolone-treated animals.                 | 85  |
| Table 27. Histopathological analysis of cartilage, bone, & synovium in Fluocinolone-treated animals.                  | 86  |
| Table 28. Histopathological analysis of proteoglycan and matrix loss in Meloxicam-treated animals.                    | 86  |
| Table 29. Histopathological analysis of cartilage, bone, and synovium in Meloxicam-treated animals.                   | 86  |
| Table 30. Histopathological analysis of proteoglycan and matrix loss in Tranilast-treated animals.                    | 87  |
| Table 31. Histopathological analysis of cartilage, bone, and synovium in Tranilast-treated animals.                   | 87  |
| Table 32. Histopathological analysis of proteoglycan and matrix loss in Triamcinolone Hexacetonide-treated animals.   | 88  |
| Table 33. Histopathological analysis of cartilage, bone, and synovium in Triamcinolone Hexacetonide-treated animals.  | 88  |
| Table 34. Histopathological analysis of proteoglycan and matrix loss in Clonidine-treated animals.                    | 88  |
| Table 35. Histopathological analysis of cartilage, bone, and synovium in Clonidine-treated animals.                   | 89  |
| Table 36. Histopathology of animals treated with vehicle alone (Group 1; Systemic delivery)                           | 105 |
| Table 37. Histopathology of animals treated with morphine (Group 2; Systemic delivery)                                | 106 |
| Table 38. Histopathology of animals treated with Tacrolimus (Group 3; Systemic delivery low dose)                     | 106 |
| Table 39. Histopathology of animals treated with Tacrolimus (Group 4; Systemic delivery high dose)                    | 107 |
| Table 40. Histopathology of animals treated with fluocinolone (Group 5; Systemic delivery low dose)                   | 107 |
| Table 41. Histopathology of animals treated with fluocinolone (Group 6; Systemic delivery high dose)                  | 108 |
| Table 42. Histopathology of animals treated with clonidine (Group 7; Systemic delivery)                               | 108 |
| Table 43. Histopathology of animals treated with Alendronate (Group 8; Systemic delivery)                             | 109 |

|                                                                                                                 |     |
|-----------------------------------------------------------------------------------------------------------------|-----|
| Table 44. Histopathology of animals treated with Curcumin (Group 9; Oral delivery)                              | 109 |
| Table 45. Histopathology of animals treated with Withaferin (Group 10; Oral delivery)                           | 110 |
| Table 46. Histopathology of animals treated with saline (Group 1; IA delivery)                                  | 113 |
| Table 47. Histopathology of animals treated with clonidine (Group 2; SC delivery)                               | 113 |
| Table 48. Histopathology of animals treated with clonidine (Group 3; IA delivery)                               | 114 |
| Table 49. Histopathology of animals treated with Triamcinolone Hexacetonide (Group 4; IA delivery)              | 114 |
| Table 50. Histopathology of animals treated with low dose Tacrolimus (Group 5; IA delivery)                     | 115 |
| Table 51. Histopathology of animals treated with high dose Tacrolimus (Group 6; IA delivery)                    | 115 |
| Table 52. Histopathology of animals treated with Fluocinolone (Group 7; IA delivery)                            | 116 |
| Table 53. Histopathology of animals treated with Curcumin (Group 8; IA delivery)                                | 116 |
| Table 54. Experimental Design and Key for MIA Trial 1.                                                          | 118 |
| Table 55. Experimental Design and Key for MIA Trial 2.                                                          | 118 |
| Table 56. Experimental Design and Key for MIA Trial 3.                                                          | 118 |
| Table 57. Experimental Design and Key for MMT/MCLT Trial 1.                                                     | 119 |
| Table 58. Experimental Design and Key for MMT/MCLT Trial 2.                                                     | 119 |
| Table 59. Individual animal WB score data for MIA Trial 1 Day 7. Scores calculated as indicated in the methods. | 120 |
| Table 60. Individual animal WB score data for MIA Trial 1 Day 14.                                               | 121 |
| Table 61. Individual animal WB score data for MIA Trial 1 Day 21.                                               | 122 |
| Table 62. Individual animal WB score data for MIA Trial 1 Day 28.                                               | 123 |
| Table 63. Individual animal joint compression data for MIA 2 Day 7.                                             | 124 |
| Table 64. Individual animal joint compression data for MIA 2 Day 14.                                            | 125 |
| Table 65. Individual animal joint compression data for MIA 2 Day 21.                                            | 126 |
| Table 66. Individual animal joint compression data for MIA 2 Day 28.                                            | 127 |
| Table 67. Individual joint compression data for MIA Trial 3 Day 7.                                              | 128 |
| Table 68. Individual joint compression data for MIA Trial 3 Day 14.                                             | 129 |
| Table 69. Individual joint compression data for MIA Trial 3 Day 21.                                             | 130 |
| Table 70. Individual joint compression data for MIA Trial 3 Day 28.                                             | 131 |
| Table 71. Individual animal data for MMT/MCLT Trial 1 Baseline and Day 7 data                                   | 132 |
| Table 72. Individual animal data for MMT/MCLT Trial 1 Day 14 data                                               | 135 |
| Table 73. Individual animal data for MMT/MCLT Trial 1 Day 21 data                                               | 138 |
| Table 74. Individual animal weight bearing data for the MMT/MCLT Trial 2 Day 7 Data                             | 142 |
| Table 75. Individual animal data for MMT/MCLT IA Trial 2 Day 14 data                                            | 146 |
| Table 76. Individual animal data for MMT/MCLT IA Trial 2 Day 21 data                                            | 150 |

## Figures

|                                                                       |    |
|-----------------------------------------------------------------------|----|
| Figure 1. MIA Trial Timeline                                          | 7  |
| Figure 2. MMT/MCLT Trial Timeline                                     | 10 |
| Figure 3. Sulfasalazine effects on the different reporter plasmids    | 18 |
| Figure 4. NFkB activity in HeLa cells using the dual reporter system. | 19 |

|                                                                                                                                                                                           |    |
|-------------------------------------------------------------------------------------------------------------------------------------------------------------------------------------------|----|
| Figure 5 - Measurement of drug effects on osteoclastogenesis and osteoclast activity.                                                                                                     | 22 |
| Figure 6. Effect of sulfasalazine on osteoclast differentiation vs. mature activity.                                                                                                      | 23 |
| Figure 7 – Effects of different drugs on osteoclastogenesis using the Osteologic assay.                                                                                                   | 24 |
| Figure 8 - Effects of different drugs on osteoclastogenesis using the Osteologic assay.                                                                                                   | 25 |
| Figure 9 - Effects of different drugs on osteoclastogenesis using the Osteologic assay.                                                                                                   | 26 |
| Figure 10 - Effects of Epigallocatechin Gallate (EGCG), Tacrolimus, Triamcinolone Hexacetonide and 3-O-Acetyl-11-keto- $\beta$ -Boswellic Acid (Boswellia) on MMP-13 levels.              | 27 |
| Figure 11 - Effects of Epigallocatechin Gallate (EGCG), Dimethyl Sulfoxide (DMSO), Clonidine, Fluocinolone and 3-O-Acetyl-11-keto- $\beta$ -Boswellic Acid (Boswellia) on MMP-13 levels   | 28 |
| Figure 12 - Effects of BAY 11-7082, BMS-345541, Alendronate and Meloxicam on MMP-13 levels.                                                                                               | 29 |
| Figure 13 - Effects of IKK-2 Inhibitor VI, IKK-2 Inhibitor VIII, CORM-2, Rhein, GM6001, Curcumin and SC514 on MMP-13 levels.                                                              | 30 |
| Figure 14 - Effects of Diacerin, IKK-2 Inhibitor V, Withaferin A, Triamcinolone Hexacetonide, Curcumin 14 and Amrinone on MMP-13 levels.                                                  | 31 |
| Figure 15 - Effects of Triamcinolone Acetonide, NFkB Activation Inhibitor IV, Sulindac, Sulfasalazine, Tranilast and Resveratrol on MMP-13 levels.                                        | 32 |
| Figure 16 - Effects of BAY 11-7082, Ketorolac, Clonidine, Resveratrol, and Fluocinolone on MMP-13 levels.                                                                                 | 33 |
| Figure 17 - Effects of BMS-345541 (IKK-2 Inhibitor III), IKK-2 Inhibitor VI and CORM-2 on MMP-13 levels.                                                                                  | 34 |
| Figure 18 - Effects of Pimecrolimus, Ethanol, Ascomycin, Boswellia, SC514 and Triamcinolone Acetonide on MMP-13 levels.                                                                   | 35 |
| Figure 19 – Effects of Triamcinolone Hexacetonide, Sulindac, Meloxicam, Alendronate, Amrinone and Sulfasalazine on viability of synovial sarcoma cells (SW982) +/-TNF-alpha               | 36 |
| Figure 20 – Effects of BMS-345541, BAY 11-7082, GM6001, Tranilast, CORM-2, Triamcinolone Acetonide, and IKK2 Inhibitor V on the viability of synovial sarcoma cells (SW982) +/-TNF-alpha. | 37 |
| Figure 21 – Effects of Tranilast, Resveratrol, Verapamil, CORM-2, Sulindac, and Sulfasalazine on the viability of SW982 cells +/- TNF alpha.                                              | 38 |
| Figure 22 - Effects of GM6001, NFkB Activation Inhibitor IV, BMS-345541 and Triamcinolone Acetonide on the viability of SW982 cells +/- TNF-alpha.                                        | 39 |
| Figure 23 – The effects of Tacrolimus, Boswellia, EGCG, Fluocinolone, IKK2 Inhibitor VI, Withaferin A and Curcumin on the viability of SW982 cells +/- TNF-alpha.                         | 40 |
| Figure 24 – The effects of Curcumin-14, Clonidine, IKK2 Inhibitor VIII, Amrinone and DMSO on the viability of SW982 cells +/- TNF alpha.                                                  | 41 |
| Figure 25 – The effects of Rhein, SC514, Ketorolac, Pimecrolimus, Resveratrol and Ascomycin on the viability of SW982 cells +/- TNF- alpha.                                               | 42 |
| Figure 26 – The effects of Triamcinolone Acetonide, Meloxicam, SC514, and Diacerin on the viability of SW982 cells +/- TNF alpha.                                                         | 43 |
| Figure 27 – The effects of Traimcinolone Hexacetonide, Clonidine, Curcumin-14, Fluocinolone, NFkB Activation Inhibitor, Curcumin and Tacrolimus on the viability of SW982 +/- TNF-alpha.  | 44 |
| Figure 28. Drug toxicity testing with chondrogenic pellets for agents tested in vivo.                                                                                                     | 45 |
| Figure 29. Drug toxicity testing with chondrogenic pellets for agents not tested in vivo.                                                                                                 | 47 |
| Figure 30 – Effect of vehicle on weight bearing on Days 7, 14, 21, and 28                                                                                                                 | 55 |
| Figure 31 – Effect of morphine (s.c.) weight bearing on Day 7                                                                                                                             | 56 |

|                                                                                                                                                                                                     |               |
|-----------------------------------------------------------------------------------------------------------------------------------------------------------------------------------------------------|---------------|
| Figure 32 - Effect of morphine (s.c.) on weight bearing on Day 14                                                                                                                                   |               |
| 56                                                                                                                                                                                                  |               |
| Figure 33 - Effect of morphine (s.c.) on weight bearing on Day 21                                                                                                                                   | 57            |
| Figure 34 - Effect of morphine (s.c.) on weight bearing on Day 28                                                                                                                                   | 57            |
| Figure 35 - Effect of clonidine (s.c.) on weight bearing on Day 7                                                                                                                                   | 58            |
| Figure 36 - Effect of clonidine (s.c.) on weight bearing on Day 14                                                                                                                                  | 58            |
| Figure 37- Effect of clonidine (s.c.) on weight bearing on Day 21                                                                                                                                   | 59            |
| Figure 38 - Effect of clonidine (s.c.) on weight bearing on Day 28                                                                                                                                  | 59            |
| Figure 39–Pre-dose effect of daily fluocinolone administration (s.c.) on weight bearing                                                                                                             | 60            |
| Figure 40 - Effect of fluocinolone (s.c.) on weight bearing on Day 21                                                                                                                               | 60            |
| Figure 41 – Pre-dose effect of weekly clonidine (s.c.) administration on MIA-induced mechanical hyperalgesia                                                                                        | 61            |
| Figure 42 - Effect of clonidine (s.c.) on MIA-induced mechanical hyperalgesia on Day 7                                                                                                              | 62            |
| Figure 43 - Effect of clonidine (s.c.) on MIA-induced mechanical hyperalgesia on Day 14                                                                                                             | 62            |
| Figure 44- Effect of clonidine (s.c.) on MIA-induced mechanical hyperalgesia on Day 21                                                                                                              | 63            |
| Figure 45 - Effect of clonidine (s.c.) on MIA-induced mechanical hyperalgesia on Day 28                                                                                                             | 63            |
| Figure 46 - Effect of daily Tacrolimus administration on pre-dosing MIA-induced mechanical hyperalgesia                                                                                             | 64            |
| Figure 47 - Effect of Tacrolimus on MIA-induced mechanical hyperalgesia on Day 21                                                                                                                   | 64            |
| Figure 48– Effect of Curcumin on MIA-induced mechanical hyperalgesia on Day 7                                                                                                                       | 65            |
| Figure 49 - Effect of Fluocinolone on MIA-induced mechanical hyperalgesia on Day 14                                                                                                                 | 65            |
| Figure 50 - Effect of weekly intra-articular Test Compound administration on MIA-induced mechanical hyperalgesia in the rat measured prior to dosing compared to day 7 pretreatment baseline values | 68            |
| Figure 51 - Effect of the intra-articular Test Compounds on MIA-induced mechanical hyperalgesia on Day 7                                                                                            | 68            |
| Figure 52 - Effect of the intra-articular Test Compounds on MIA-induced mechanical hyperalgesia on Day 14                                                                                           | 68            |
| Figure 53 - Effect of the intra-articular Test Compounds on MIA-induced mechanical hyperalgesia on Day 21                                                                                           | 69            |
| Figure 54 - Effect of the intra-articular Test Compounds on MIA-induced mechanical hyperalgesia on Day 28                                                                                           | 69            |
| Figure 55- Representative images from Trial 3 MIA Model                                                                                                                                             | 90            |
| Figure 56 - Day 7, 14, and 21 incapacitance results displayed as a ratio of injured to non-injured and compared with baseline control (shown as a line).                                            | 101           |
| Figure 57 - Representative images from Trial 1 MMT/MCLT.<br><b>Bookmark not defined.</b>                                                                                                            | <b>Error!</b> |
| Figure 58 - Representative cross-sectional images from vehicle-treated MCLT/MMT animals (Trial 2).<br><b>Bookmark not defined.</b>                                                                  | <b>Error!</b> |
| Figure 59- Cross section of the joint space for Triamcinolone Hexacetonide treated rats (Trial 2).                                                                                                  | 111           |

## I. Supplementary Methods

### In Vivo Functional Testing

All studies, although non-GLP, were conducted according to Good Laboratory Practices defined in 21 CFR Part 58 with prior Institutional Animal Use Committee approval.

See Appendix for individual animal data. Experimental design is shown in the Appendix of this Supplement. All investigators and study personnel were blind to the groups and treatments through statistical analysis for each study except Trial 1 of the MIA model. In this study, only persons conducting weight bearing and the Pathologist scoring the histopathology slides were blinded to the treatments and groups.

### Monoiodoacetate (MIA) Model

All studies using the MIA model were conducted at ALGOS Therapeutics. Figure 1 depicts the typical timeline for the MIA trials.

**Figure 1. MIA Trial Timeline**

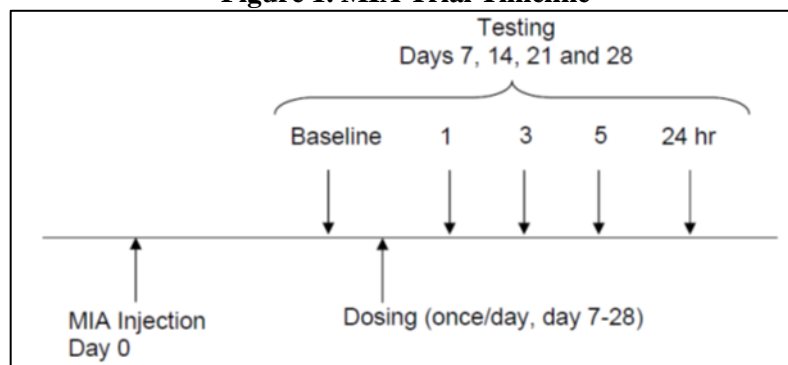

### MIA Trial 1

Male Wistar rats (Harlan, Indianapolis, Indiana, U.S.A.) weighing  $207 \pm 2$  grams on the first day of dosing were housed three per cage. Animals had free access to food and water and were maintained on a 12:12h light/dark schedule for the duration of the study. The animal colony was maintained at approximately 21°C. All experiments were conducted in accordance with the International Association for the Study of Pain Guidelines.

MIA was administered into the left knee as previously described at day 0. Drugs and other compounds were solubilized and stored as recommended by the suppliers. All therapeutic agents and vehicle tested were administered via subcutaneous injection in a 5 ml/kg dose volume once a day. On each test day, WB was measured prior to dosing and 1,3,5, and 24 hours after dosing. Body weight was measured pre-dose.

As previously described, limb WB was measured using a Linton Incapacitance Tester (Stoelting Co., Wood Dale, IL). For each time point tested, rats were allowed to acclimate to the test chamber. Three readings were taken, with each reading measuring the average force exerted over a three second interval. The percent WB for the injured leg was calculated using the following formula:

$$\% \text{ WB Score} = 100 \times \left[ \frac{\text{WB on left leg}}{\text{WB on left leg} + \text{WB on right leg}} \right]$$

Treatment groups were assigned based on pre-treatment WB score on Day 7. For each time point tested, the mean of the three WB tests and standard error of the mean (SEM) were determined for each treatment group.

Statistical analyses were conducted using Prism 5.01 (GraphPad, San Diego, CA, USA). The stability of the vehicle group over time was assessed on each testing day (Days 7, 14, 21, and 28) using repeated measures one-way analysis of variance (ANOVA) comparing WB scores (WB) at each experimental time point on a given testing day versus that testing day's pre-treatment measurement. Osteoarthritis-related pain in the vehicle group was estimated by comparing pre-treatment WB on each testing day versus pre-MIA measurements using repeated measures one-way ANOVA. The acute effects of morphine, clonidine, and fluocinolone were analyzed by comparing WB at each experimental time point on a given testing day with the corresponding vehicle measurements using an unpaired t-test. The chronic effects of morphine, clonidine, and fluocinolone treatment were analyzed by comparing pre-treatment WB on each testing day versus the appropriate Day 7 pre-treatment measurements using repeated measures one-way ANOVA and by comparing pre-treatment WB with vehicle pre-treatment WB on each testing day using an unpaired t-test. Pre-MIA and Day 7 pre-treatment WB between all groups was assessed using one-way ANOVA. The Dunnett's multiple comparison post hoc test was used when appropriate.

## **MIA Trial 2**

Male Wistar rats (Harlan, Indianapolis, Indiana, U.S.A.) weighing  $178 \pm 1$  grams (167-207 g) on the first day of dosing were housed three per cage. Animals had free access to food and water and were maintained on a 12:12h light/dark schedule for the duration of the study. Starting on Day 8 after MIA injection, animals receiving Compound C were fed diets consisting of Harlan Teklad 2018, water, sweetened condensed milk and approximately 30 g per rat Bio-Serve cherry flavor nutra-gel (cat# S4798-cup, lot# 109533) in addition to Bio-Serve liquid rat diet diluted 1:4 with water and approximately 40 ml of sweetened condensed milk (cat# F1259SP, lot# 109751). The animal colony was maintained at approximately 21°C. All experiments were conducted in accordance with the International Association for the Study of Pain Guidelines and were approved by the Algos Therapeutics, Inc. animal care and use committee.

MIA was administered into the left knee as previously described, and all dosing and testing occurred according to the timeline in Figure 1.

Clonidine HCL (CTM-723, 2 mg/ml) was administered weekly, while all other test agents were administered daily. All drugs except curcumin were diluted from stock solutions on the day of administration. Curcumin was weighed each day of dosing and suspended in 0.3% methyl cellulose prior to gavage. Clonidine, Fluocinolone and vehicle were administered via subcutaneous injection in a 5 ml/kg dose volume. Tacrolimus was administered via intraperitoneal injection in a 1 ml/kg dose volume. Curcumin was administered via oral gavage in a dose volume of 5 ml/kg.

Baseline and post-treatment values for mechanical sensitivity were evaluated using a digital Randall-Selitto (dRS) test device (IITC Life Sciences, Woodland Hills, CA). Animals were allowed to acclimate to the testing room for a minimum of 30 minutes before testing. Animals were placed in a restraint sling that suspended the animal, leaving the hind limbs available for testing. Joint compression threshold was measured once at each time point for the ipsilateral and contralateral knee joints. Pressure was applied gradually over approximately 10 seconds to the medial and lateral aspects of the knee joint. Measurements were taken from the first observed behavior of vocalization,



struggle or withdrawal. A cut-off value of 600 g was used to prevent injury to the animal. The mean and standard error of the mean (SEM) were determined for each treatment group.

As with Trial 1, statistical analyses were conducted using Prism™ 5.01. Statistical significance was assigned as  $p \leq 0.05$ . The stability of the vehicle group over time was assessed on each testing day (Days 7, 14, 21, and 28) using repeated measures one-way analysis of variance (ANOVA) comparing joint compression thresholds at each experimental time point on a given testing day versus that testing day's pre-treatment value. Osteoarthritis-related pain in the vehicle group was estimated at each time point on each testing day by comparing ipsilateral (injured) to contralateral (normal) joint compression thresholds using paired t-tests. The progression of osteoarthritis-related pain in the vehicle group was estimated by comparing pre-treatment joint compression thresholds on each testing day versus pre-MIA measurements using repeated measures one-way ANOVA.

The acute effects of clonidine and Fluocinolone were analyzed by comparing joint compression thresholds at each experimental time point on a given testing day with vehicle treated animals using an unpaired t-test. The acute effect of Tacrolimus was analyzed by comparing joint compression thresholds at each time point on a given testing day with the corresponding pre-treatment baseline values using repeated measures one-way ANOVA and compared to vehicle treated animals using one-way ANOVA. The acute effect of Curcumin was analyzed by comparing joint compression thresholds at each time point on a given testing day with the corresponding pre-treatment baseline values using repeated measures one-way ANOVA. Chronic effects were analyzed by comparing pre-treatment joint compression thresholds on each testing day versus the appropriate Day 7 pre-treatment values using repeated measures one-way ANOVA and by comparing pre-treatment joint compression thresholds with vehicle treated animals on each testing day using an unpaired t-test or one-way ANOVA. Day 7 pre-treatment joint compression thresholds between all groups were assessed using one-way ANOVA. The Dunnett's multiple comparison post hoc test was used when appropriate.

### **MIA Trial 3**

Male Wistar rats (Harlan, Indianapolis, Indiana, U.S.A.) weighing  $207 \pm 2$  grams on the first day of dosing were housed three per cage. Animals had free access to food and water and were maintained on a 12:12h light/dark schedule for the duration of the study. The animal colony was maintained at approximately 21°C. All experiments were conducted in accordance with the International Association for the Study of Pain Guidelines.

Vehicle and compounds were administered locally into the injured knee joint (intra-articular; i.a.) on Days 7, 14, 21, and 28. Clonidine (0.1 mg/kg) served as the positive control and was administered subcutaneously on Days 7, 14, 21, and 28. All injections were done with a 27 gauge needle. As described for Trial 2, mechanical hyperalgesia was measured by determining the force, applied to either the ipsilateral (injured) or contralateral knee, required to elicit a nocifensive response to joint compression using a digital Randall-Selitto test device. Joint compression thresholds were measured 7, 14, 21 and 28 days after MIA injection. On all testing days after MIA injection, joint compression thresholds were measured prior to dosing and 1, 3, 5, and 24 hours after dosing. Individual animal data is shown in the Appendix.

### **Meniscal Tear (MMT/MCLT) Model**

All MMT/MCLT trials and associated analyses were conducted at BolderBioPath. The general timecourse for each study is depicted in Figure 2. Animals (8 or 10/group), were housed 2-3/cage and kept on a 12 hour light/dark schedule. To initiate the model, animals were anesthetized with

Isoflurane and the right knee area prepared for surgery. A skin incision was made over the medial aspect of the knee and the medial collateral ligament was exposed by blunt dissection and then transected. The medial meniscus was cut through the full thickness to simulate a complete tear and the skin was then closed with suture.

All pharmaceutical agents were prepared and stored as recommended by the supplier. Daily drug preparations were made fresh from stock solutions. In Trial 1, test articles were administered subcutaneously daily for three weeks beginning one day prior to surgery. In Trial 2 drugs were administered IA weekly beginning one week following surgery. Both Curcumin and Withaferin were delivered by gavage and were prepared in 0.3% Methyl Cellulose.

WB was measured five times a day, once a week, using a Linton incapitance meter (Stoelting Co.) to assess pain behavior. Rats were acclimated to the incapitance meter prior to study initiation. Similarly, immediately prior to WB animals were placed in the incapitance meter and allowed to acclimate for 2-5 minutes. Each hind paw was placed on a separate force plate so that the force exerted by each side could be averaged over a 5 second interval and the mean of three readings taken for each data point. Right paw force was compared to left for each group to confirm that animals were displaying incapitance / pain behavior. Difference in force (left minus right) and right paw force as a percentage of the total force exerted by both paws were determined and compared between groups. Three weeks after surgery, animals were humanely euthanized and right knees collected for histopathology evaluation.

**Figure 2. MMT/MCLT Trial Timeline**

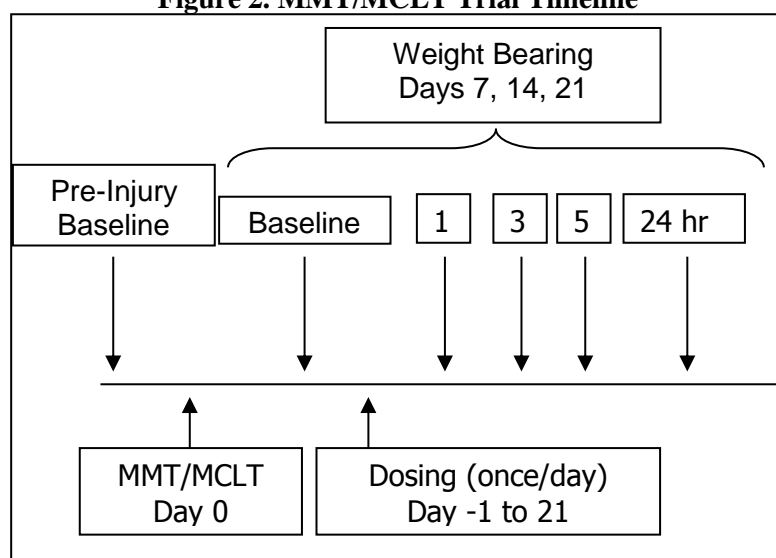

### **MMT/MCLT Trial 1**

The study design and animal usage was approved by Bolder BioPATH's Institutional Animal Care and Use Committee (IACUC) for compliance with regulations prior to study initiation (IACUC Protocol #BBP03-006).

Male Lewis rats weighing 261-291 grams (mean 277) on day -1 were obtained from Charles River Labs. Animals were identified by a distinct mark at the base of the tail delineating group and animal number. After randomization, all cages were labeled with protocol number, group numbers, and animal numbers with appropriate color-coding (see protocol).

Upon arrival, animals were housed 4/cage in shoe-box polycarbonate cages with wire tops, wood chip bedding and suspended food and water bottles. The cages conformed to the guidelines cited in the Guide for the Care and Use of Laboratory Animals (4). Animals were acclimated for 7 days prior to being randomized into groups. An attending veterinarian was on site or on call during the live phase of the study, and no concurrent medications were given. During the acclimation and study periods, animals were housed in a laboratory environment with temperatures ranging between 67-76°F and relative humidity between 30-70%. Automatic timers provided 12 hours of light and 12 hours of dark. Animals were allowed access ad libitum to Harlan Teklad Rodent Chow and fresh municipal tap water.

Dosing by the intraperitoneal route (qd at 24 hr intervals) was initiated on day -1 before surgery and was continued for 3 weeks except group 2 (morphine) was dosed on days 7, 14, 21 only for purposes of pain testing. Both Withaferin and Curcumin were delivered by gavage qd at 24 hr intervals. WB was measured pretreatment, and at 1,3, 5 and 24 hours post dosing.

## **MMT/MCLT Trial 2**

This basic study design and animal usage was approved by Bolder BioPATH's Institutional Animal Care and Use Committee (IACUC) for compliance with regulations prior to study initiation (IACUC Protocol #BBP03-006).

Male Lewis rats weighing 260-295 grams (mean 283) on day -5 were obtained from Charles River Labs. Animals were identified by a distinct mark at the base of the tail delineating group and animal number. After randomization, all cages were labeled with protocol number, group numbers, and animal numbers with appropriate color-coding (see protocol).

Upon arrival, animals were housed 4/cage in shoe-box polycarbonate cages with wire tops, wood chip bedding and suspended food and water bottles. The cages conformed to the guidelines cited in the Guide for the Care and Use of Laboratory Animals. Animals were acclimated for 7 days prior to being randomized into groups. An attending veterinarian was on site or on call during the live phase of the study, and no concurrent medications were given. During the acclimation and study periods, animals were housed in a laboratory environment with temperatures ranging between 67-76°F and relative humidity between 30-70%. Automatic timers provided 12 hours of light and 12 hours of dark. Animals were allowed access ad libitum to Harlan Teklad Rodent Chow and fresh municipal tap water.

Dosing by the intra-articular route was initiated on day 7 after surgery and was continued for 3 weeks (days 7, 14, 21) in all groups except group 2 (clonidine) which was dosed subcutaneously (systemically) on days 7, 14, 21. WB was measured pretreatment, and at 1,3, and 5 hours post dosing.

## **Histopathology**

Dissected joints were fixed in 10% formaldehyde and decalcified for two days in 10% formic acid. Knees were trimmed into approximately two equal frontal halves, processed through graded alcohol to dehydrate, cleared and paraffin embedded by conventional methods. Blocks were sectioned and stained with either or both hematoxylin and eosin or toluidine blue.

## **Histopathology MIA Model**

The histopathology for the first MIA trial was performed by Premier Laboratories (Dr. Michael Hawes, APS, Pathologist). Treatments were masked during the assessment. Chondrocyte necrosis and proteolytic degeneration of the femurs were scored on a 5 point scale with 0 = None; 1 = <10%; 2 = 10-30%; 3 = 30-60%; 4 = 60-90%; 5 =>90%.. Other parameters analyzed included proteoglycan content (safranin O staining), synovial membrane inflammation and proliferation, subchondral bone, and articular cartilage (as indicated in Supplementary methods). Characteristics within these categories were scored as normal, minimal, mild, moderate, marked, or +/- when severity was not graded. Slides from Trial 2 were further reviewed by Dr. Bendele using the analytical method described below for the MMT/MCLT model to confirm any conclusions.

For the histopathology of the MIA model in Trial 3, completed by Bolder BioPATH (and Dr. Bendele), a toluidine blue stained slide containing both halves of the joint was comprehensively analyzed from test and control subjects. Approximate % of total loss of articular chondrocytes, loss of proteoglycan and loss of collagenous matrix were determined for each articular surface (medial tibial plateau (MTP), lateral tibial plateau (LTP), medial femoral condyle (MFC), and lateral femoral condyle (LFC). Chondrocyte loss was quantified by estimating the area of cartilage in which there were no apparently viable chondrocytes and proteoglycan loss was quantified by estimating differences in intensity of toluidine blue matrix staining. Loss of interstitial matrix was an indication of disruption and diminished type II collagen. Based on the mean % loss for the four surfaces in these parameters, a five point matrix score was utilized with the subchondral bone resorption, subchondral bone sclerosis and osteophyte scores to achieve a total joint score.

### **Histopathology MMT/MCLT Model**

Degenerative changes occur by 3-6 weeks post-surgery in the MMT/MCLT model and are of greatest severity on the outer 1/3 of the tibial cartilage. Less severe degenerative changes are observed in the middle and inner 1/3 of the tibial cartilage. Osteophytes progressively increase in size and are ultimately quite large (medial tibia). By 12 months nearly all rats show total cartilage loss. Due to the rapid progression of cartilage degeneration, protective effects of therapeutics are not always apparent in the outer 1/3 of the tibial cartilage, although zonal analysis may reveal effects of treatment in the middle and inner 1/3. Substantial subchondral and epiphyseal bone changes occur in the medial tibia subjacent to the areas of greatest lesion severity. This model offered an opportunity to evaluate both the chondroprotective effects and bone preserving activities of the various agents tested.

The histopathological analysis of the MMT/MCLT model was also performed by Bolder BioPATH and Dr. Bendele. To accomplish this, three sections were cut from each paraffin embedded knee at 200 uM steps, stained with toluidine blue (with a right and left halve per section), and analyzed for cartilage degeneration, proteoglycan loss, collagen damage, and osteophyte formation. Results were averaged across the 3 sections for an overall semi-quantitative score. Regional differences across the tibial plateau were taken into consideration by dividing each section into 3 zones delineated using an ocular micrometer (outside, middle, and inside). Scores were based on the percentage of area affected within the zone.

Cartilage degeneration in the tibia was scored on a five point scale for each zone, collagen damage across the medial tibial plateau was measured by total width for each grade damage. Cartilage degeneration in the tibia was scored none to severe (numerical values 0-5) for each zone (area defined by micrometer) using the following criteria:

0=no degeneration

1=minimal degeneration, chondrocyte and proteoglycan loss, generally without fibrillation involving the mainly the superficial zone or extending into the upper 10% of the cartilage thickness (50% or greater width of the zone), or at least 5% but not more than 10% overall total proteoglycan and cell loss in the zone if lesion is focal and deeper in some areas

2=mild degeneration, chondrocyte and proteoglycan loss with fibrillation involving mainly the upper 25% of cartilage thickness (50% or greater width of the zone), fibrillation generally superficial (upper 10%) while chondrocyte and PG loss extend into approximately 25% of the cartilage depth, or 10-25% overall chondrocyte and proteoglycan loss in the zone if lesion is focal and deeper in some areas

3=moderate degeneration, chondrocyte and proteoglycan loss with fibrillation extending well into the midzone and generally affecting " (50%) of the total cartilage thickness (50% or greater width of the zone), fibrillation/collagen damage generally extends into upper 25% while chondrocyte and PG loss extend through 50% thickness, or 25-50% overall chondrocyte and proteoglycan loss in the zone if lesion is focal and deeper in some areas

4=marked degeneration, chondrocyte and proteoglycan loss with fibrillation extending through the mid zone into the lower 1/3 (75% of cartilage thickness) but without complete (to the tidemark) loss of chondrocytes or proteoglycan (50% or greater width of the zone), fibrillation/collagen damage generally extend through the mid zone (50% thickness) but deep zone collagen remains intact and chondrocyte and PG loss extend through 75% of cartilage thickness, or 50-75% overall chondrocyte and proteoglycan loss in the zone if lesion is focal and deeper in some areas

5=severe degeneration, matrix loss to tidemark (50% or greater width of the zone), or 75-100% overall chondrocyte and proteoglycan loss in the zone A 3-zone sum for cartilage degeneration was also calculated. Femoral general cartilage degeneration was scored using the same criteria without attention to zones.

In addition to overall cartilage degeneration, collagen damage across the medial tibial plateau (the most severely affected section of the 2 halves) was quantified by measuring the total width of the following:

- Any damage (fibrillation ranging from superficial to full thickness loss).
- Severe damage (total or near total loss of collagen to tidemark, >90% thickness)
- Marked damage (extends through 61-90% of the cartilage thickness)
- Moderate damage (extends thru 31-60% of the cartilage thickness)
- Mild damage (extends through 11-30% of the cartilage thickness)
- Minimal damage (very superficial, affecting upper 10% only)

Two cartilage degeneration width measurements were also taken:

(1) The total tibial cartilage degeneration width (um) of the total extent of tibial plateau affected by any type of degeneration (cell loss, proteoglycan loss or collagen damage). This measurement extended from the origination of the osteophyte with adjacent cartilage degeneration (outside 1/3) across the surface to the point where tangential layer and underlying cartilage appeared histologically normal.

(2) The significant cartilage degeneration width (um) reflects areas of tibial cartilage degeneration in which both chondrocyte and proteoglycan loss extend through greater than 50% of the cartilage thickness. In general, the collagen damage is mild (25% depth) or greater for this

parameter but chondrocyte and proteoglycan loss extend to at least 50% or greater of the cartilage depth.

A micrometer depth of any type of lesion (both chondrocyte and proteoglycan loss, but may have good retention of collagenous matrix and no fibrillation), expressed as a ratio of depth of changed area vs. depth to tidemark, was taken in the area of greatest lesion severity in each of the 3 zones across the tibial surface at the midpoint of the zone. This measurement is the most critical analysis of any type of microscopic change present. The denominator can serve as an average measure of cartilage thickness in each of the 3 zones for comparison of anabolics when measures are taken at the midpoint of the zone. In this study, the cartilage thickness of zone 3 was evaluated in this manner.

Osteophytes and femoral cartilage degeneration were also scored. The femoral degeneration and the 3 zone tibial degeneration scores were summed to create the total cartilage degeneration score. The mean osteophyte score for each joint was added to this value to create a total joint score.

Scoring of the osteophytes and categorization into small, medium and large was done with an ocular micrometer. Marginal zone proliferative changes have to be  $\geq 200$   $\mu\text{m}$  in order to be measured and designated as osteophytes. Scores are assigned to the largest osteophyte in each section (typically found in the tibia) according to the following criteria:

- 1=small up to 299  $\mu\text{m}$
- 2=moderate 300-399  $\mu\text{m}$
- 3=large 400-499  $\mu\text{m}$
- 4=very large 500-599
- 5=very large 600

The actual osteophyte measurement (tidemark to furthest distance point extending toward synovium) was also recorded. The femoral cartilage degeneration score and the 3-zone sum of the tibial cartilage degeneration scores (mean of 3 levels) were summed to create a total cartilage degeneration score. The mean osteophyte score for each joint was added to this value to create a **total joint score**.

Overall findings including synovial health were assessed and documented (e.g., Table 1), and representative images were saved for each animal (note that not all documentation is shown here). The most complete histopathological analyses were completed for the last MIA Trial # 3 and the MMT/MCLT Trials.

**Table 1 and 2** below are examples of the method used to quantify histopathological changes for each animal, including individual animal joint histopathology and scoring of cartilage degeneration.

**Table 1** – Example of a histopathology report for an individual animal.

| Individual Animal Histopathology Report (ROA/MED-2)                     |              |          |          |          |                                                               |                                 |       |            |        |       |
|-------------------------------------------------------------------------|--------------|----------|----------|----------|---------------------------------------------------------------|---------------------------------|-------|------------|--------|-------|
| <b>Study Information</b>                                                |              |          |          |          |                                                               |                                 |       |            |        |       |
| Species: Rat<br>Group: 4<br>Necropsy Day: 25                            |              |          |          |          | Sex: Male<br>Animal Number: 4<br>Disposition: Killed Terminal |                                 |       |            |        |       |
| <b>Pathology</b>                                                        |              |          |          |          |                                                               |                                 |       |            |        |       |
|                                                                         | Medial Tibia |          |          | Mean     | Width (µm)                                                    | Medial Femur                    | Score | Osteophyte |        | Score |
|                                                                         | Outside      | Middle   | Inside   | by level | total/sub                                                     |                                 |       |            |        |       |
| Level 1                                                                 | 5            | 2        | 0        | 7        | 1000                                                          | Minimal 1/3                     | 1     | Medium     | 300 µm | 2     |
| Relative Depth                                                          | 150   150    | 20   180 | 0   280  |          | 800                                                           |                                 |       |            |        |       |
| Relative Depth Ratio                                                    | 1.00         | 0.11     | 0.00     | 0.37     |                                                               |                                 |       |            |        |       |
| Level 2                                                                 | 5            | 3        | 0        | 8        | 1100                                                          | Mild 1/3                        | 2     | Medium     | 340 µm | 2     |
| Relative Depth                                                          | 150   150    | 10   180 | 0   330  |          | 900                                                           |                                 |       |            |        |       |
| Relative Depth Ratio                                                    | 1.00         | 0.06     | 0.00     | 0.35     |                                                               |                                 |       |            |        |       |
| Level 3                                                                 | 5            | 3        | 0        | 8        | 2000                                                          | Mild 1/3                        | 2     | Medium     | 300 µm | 2     |
| Relative Depth                                                          | 150   150    | 60   230 | 10   380 |          | 900                                                           |                                 |       |            |        |       |
| Relative Depth Ratio                                                    | 1.00         | 0.26     | 0.03     | 0.43     |                                                               |                                 |       |            |        |       |
| <b>Means by Zone</b>                                                    |              |          |          |          |                                                               |                                 |       |            |        |       |
| Score                                                                   | 5.00         | 2.67     | 0.00     | 7.866667 | 1366.67                                                       | <b>Summary</b>                  |       |            |        |       |
| Relative Depth                                                          | 150   150    | 30   197 | 3   330  |          | 866.67                                                        | Bone Score 3                    |       |            |        |       |
| Relative Depth Ratio                                                    | 1.00         | 0.14     | 0.01     | 0.38     |                                                               | Mean Osteophyte Score 2.0       |       |            |        |       |
| <b>Comments</b>                                                         |              |          |          |          |                                                               | Mean Osteophyte Measurement 313 |       |            |        |       |
|                                                                         |              |          |          |          |                                                               | Mean CD Score Tibia 7.7         |       |            |        |       |
| <b>Synovium</b><br>Hypocellular Fibrous Repair                          |              |          |          |          |                                                               | Mean CD Score Femur 1.7         |       |            |        |       |
|                                                                         |              |          |          |          |                                                               | Total CD Score 9.3              |       |            |        |       |
| <b>Observations</b><br>Meniscal tear+marked bone marrow hypocellularity |              |          |          |          |                                                               | Total Joint Score 11.3          |       |            |        |       |

**Table 2** – Example of calculated histopathological degeneration for an individual animal

|        |         |         |        |        |          |        |         |  |
|--------|---------|---------|--------|--------|----------|--------|---------|--|
| Group  | 4       |         |        |        |          |        |         |  |
| Animal | 1       |         |        |        |          |        |         |  |
|        | Normal  | Total   | Severe | Marked | Moderate | Mild   | Minimal |  |
| L1     | 800     | 1200    | 500    | 0      | 200      | 200    | 300     |  |
| L2     | 900     | 1100    | 700    | 0      | 200      | 100    | 100     |  |
| L3     | 900     | 1100    | 800    | 100    | 100      | 100    | 0       |  |
| Mean   | 866.67  | 1133.33 | 666.67 | 33.33  | 166.67   | 133.33 | 133.33  |  |
| Group  | 4       |         |        |        |          |        |         |  |
| Animal | 2       |         |        |        |          |        |         |  |
|        | Normal  | Total   | Severe | Marked | Moderate | Mild   | Minimal |  |
| L1     | 900     | 1100    | 600    | 500    | 0        | 0      | 0       |  |
| L2     | 700     | 1300    | 800    | 300    | 0        | 0      | 200     |  |
| L3     | 900     | 1100    | 1000   | 0      | 100      | 0      | 0       |  |
| Mean   | 833.33  | 1166.67 | 800.00 | 266.67 | 33.33    | 0.00   | 66.67   |  |
| Group  | 4       |         |        |        |          |        |         |  |
| Animal | 3       |         |        |        |          |        |         |  |
|        | Normal  | Total   | Severe | Marked | Moderate | Mild   | Minimal |  |
| L1     | 1000    | 1000    | 300    | 100    | 0        | 0      | 600     |  |
| L2     | 1000    | 1000    | 500    | 0      | 100      | 0      | 400     |  |
| L3     | 1000    | 1000    | 600    | 100    | 100      | 0      | 200     |  |
| Mean   | 1000.00 | 1000.00 | 466.67 | 66.67  | 66.67    | 0.00   | 400.00  |  |
| Group  | 4       |         |        |        |          |        |         |  |
| Animal | 4       |         |        |        |          |        |         |  |
|        | Normal  | Total   | Severe | Marked | Moderate | Mild   | Minimal |  |
| L1     | 1000    | 1000    | 500    | 100    | 0        | 200    | 200     |  |
| L2     | 1100    | 900     | 600    | 200    | 0        | 100    | 0       |  |
| L3     | 800     | 1200    | 700    | 100    | 0        | 100    | 300     |  |
| Mean   | 966.67  | 1033.33 | 600.00 | 133.33 | 0.00     | 133.33 | 166.67  |  |
| Group  | 4       |         |        |        |          |        |         |  |
| Animal | 5       |         |        |        |          |        |         |  |
|        | Normal  | Total   | Severe | Marked | Moderate | Mild   | Minimal |  |
| L1     | 1000    | 1000    | 500    | 0      | 300      | 0      | 200     |  |
| L2     | 900     | 1100    | 600    | 100    | 100      | 0      | 300     |  |
| L3     | 1000    | 1000    | 800    | 0      | 0        | 100    | 100     |  |
| Mean   | 966.67  | 1033.33 | 633.33 | 33.33  | 133.33   | 33.33  | 200.00  |  |

## Micro CT

Knees were fixed in formalin and scanned using a Scanco µCT40 (Scanco MedicalAG, Brütisellen, Switzerland) set at 55kV x-ray tube energy, 145µA intensity with a 300ms image acquisition time. Slice thickness was 16µM, with isotropic voxels, and 511 projections were taken for each 360 degree rotation. To correct for beam hardening artifacts, a mu-scaling algorithm was applied at a level of 200 mg hydroxyapatite/cm<sup>3</sup>.

All µCT analysis was performed with the Scanco Medical Analysis software. Because the µCT scanner acquires images in a transverse plane (along the z axis of the scan), and the region of interest

(ROI) for analysis is most easily identified in sagittal sections (along the y axis), scans were reformatted from transverse to sagittal planes. The tibial plateau was identified, and the slice numbers corresponding to the medial side were recorded. One hundred slices from the middle of the region were selected for analysis, and a contour applied to the subchondral bone that was 50 pixels (800 $\mu$ M) in diameter. The final size of the ROI was 800 $\mu$ M x 1600 $\mu$ M, pre-Gauss filtering. Care was taken to exclude cortical bone and only include trabecular bone in the ROI. A morphometric analysis on the ROI of each sample was completed, with the same size Gauss filter and threshold applied throughout the entire study. The output of this analysis included total volume analyzed, bone volume, trabecular bone measurements and a structural model index.

Parameters analyzed included:

- 1) Relative bone volume in the ROI (BoneVolume /Total Volume)
- 2) Trabecular spacing, calculated by measuring 3D distances directly in the trabecular network. This was the mean diameter of spheres filling the marrow space.
- 3) Trabecular thickness, calculated by measuring 3D distances directly in the trabecular network. This was the mean diameter of spheres filling the trabecular structure
- 4) Trabecular number, calculated by measuring 3D distances directly in the trabecular network. This was taken as the inverse of the mean diameter of spheres filling the skeletonized structure.
- 5) Connectivity density, based on the Conn-Euler number
- 6) Structural model index, which indicates the relative “rod-like” or “plate-like” structure where 3 is the theoretical value of a perfect cylinder and 0 the value of a perfect plate.

## Statistics

### General

Statistical analyses were conducted using Prism 5.01 (GraphPad, San Diego, CA, USA) or MS Excel with MedStat. For in vitro testing, one or two-way analysis of variance (ANOVA) was used to look for differences and if significant further testing with Dunnett’s or pair-wise t-tests as indicated. In general, results of pairwise comparisons with controls using a standard two tailed T test are shown in Figure graphics where “\*” indicates significance of  $P \leq 0.05$ . Samples were run at least in triplicate and tests repeated. Further details are included as needed in the text and figure legends.

### $\mu$ CT

A one-way ANOVA was used to look for differences between groups and if p was found to be  $<0.05$ , then Bonferroni’s post-hoc test was performed to identify any significant differences between groups.

### MIA and MMT/MCLT

Statistical significance was assigned as  $p \leq 0.05$ .

For the MIA WB studies, comparisons were made using repeated measures one-way ANOVA comparing WB scores at each experimental time point on a given testing day with that testing day’s



pre-treatment measurement. Pain behavior in the vehicle group was estimated by comparing pre-treatment WB scores on each test day vs pre-MIA measurements using repeated measures one-way ANOVA. The acute effects of morphine, clonidine, and fluocinolone were analyzed by comparing WB scores at each test time point with the corresponding vehicle measurements using an unpaired t-test. The chronic effects of morphine, clonidine, and fluocinolone treatment were analyzed by comparing pre-treatment WB scores on each testing day versus the appropriate Day 7 pre-treatment measurements using repeated measures one-way ANOVA and by comparing pre-treatment WB with vehicle pre-treatment WB on each testing day using an unpaired t-test. Pre-MIA and Day 7 pre-treatment WB between all groups was assessed using one-way ANOVA. The Dunnett's multiple comparison post hoc test was used when appropriate.

For MIA dRS studies, repeated measures one-way ANOVA comparing joint compression thresholds at each experimental time point on a given testing day was compared versus that testing day's pre-treatment value. Osteoarthritis-related pain in the vehicle group was estimated at each time point on each testing day by comparing ipsilateral (injured) to contralateral (normal) joint compression thresholds using paired t-tests. The progression of osteoarthritis-related pain for other treatments was similarly estimated by comparing pre-treatment joint compression thresholds on each testing day versus pre-MIA measurements using repeated measures one-way ANOVA and by comparing pre-treatment joint compression thresholds with vehicle treated animals on each testing day using an unpaired t-test or one-way ANOVA.

Similarly, for the MMT/MCLT WB studies, a repeated measures one-way ANOVA comparing pre and post treatment WB measure with the vehicle treated animal or pain behavior control treatment as indicated.

For histopathological comparisons, non-qualitative scales were used for scoring, and a treatment group Mean  $\pm$  SEM for each score and measurement was determined as previously recommended by Gerwin et al., 2010 for the OARSI histopathology initiative.<sup>1</sup> Statistical analyses were then performed using parametric ANOVA methods. When several treatment groups were compared, multiple comparison procedures such as Bonferroni or Tukey correction were used. Dunnett's test was applied for comparisons to vehicle. Scored parameters were analyzed using a KruskalWallis test with Dunn's post-test.

## II. Supplementary Results

### In Vitro NF- $\kappa$ B

NF- $\kappa$ B activity was assessed in HeLa cells that were transiently transfected with two reporter constructs as described in the manuscript. Agents were tested for their ability to block TNF-stimulated activity; results for those agents also tested in vivo were described in the manuscript. Expression of the luciferase from the Renilla construct was used as a measure of viability, which was confirmed with a cytotoxicity assay (see later section). Some compounds were found to inhibit Renilla expression at high concentrations indicating a toxic effect. For example, sulfasalazine was cytotoxic at 800  $\mu$ M as measured by the Promega cytotoxicity assay and increasingly inhibited renilla expression from 50 to 800  $\mu$ M. This may in part represent an effect on the CMV promoter (**Figure 3**).

Shown below are representative results for agents tested in the NF- $\kappa$ B assay (**Figure 4**). **Figure 4** includes results not reported in the manuscript. If inhibition of TNF-activated NF- $\kappa$ B was only detected in the range of toxicity, the agents were not advanced for in vivo testing. NF- $\kappa$ B inhibitor

VI was the most effective of those compounds shown here (**Figure 4 G, H**). This agent was used for control purposes only. Ascomycin was also very effective in the range tested (**Figure 4, B**). Further testing at lower concentrations was not completed by the time in vivo testing commenced. It was unexpected that BMS-345541, Inhibitor IV, and SC514 failed to inhibit NF- $\kappa$ B in this system at the concentrations tested, especially because, similar to Inhibitor IV, they are inhibitors of IKK-2. It is possible that the half-life or stability in the HeLa cell system, which was not measured, could have played a role. Only a very high concentration (680  $\mu$ M) of Boswellia was found to be effective against NF- $\kappa$ B in this assay (not shown). IKK inhibitor V inhibited at higher concentrations (not shown).

**Figure 3.** Sulfasalazine effects on NF $\kappa$ B using the dual reporter assay

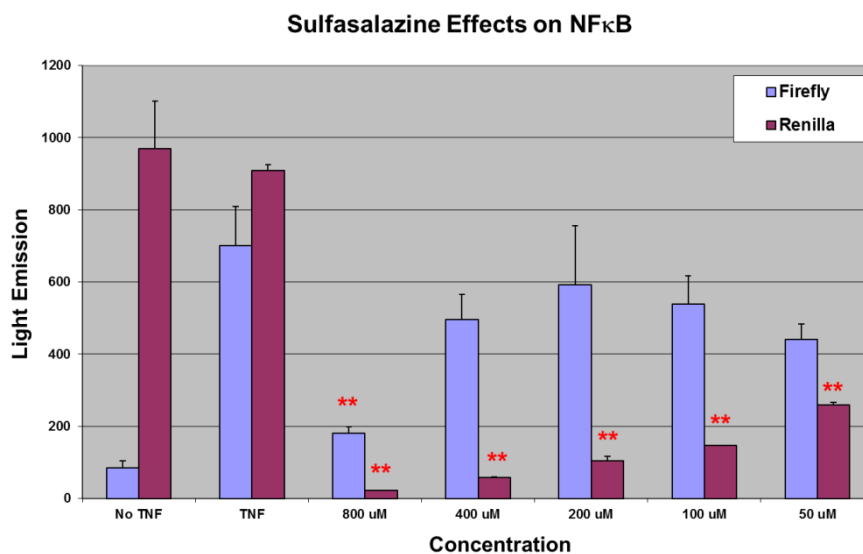

**Figure 4.** NF- $\kappa$ B activity with and without drug treatment. Controls: ‘Media’ = untreated HeLa cells; ‘Media + TNF’ = cells treated with TNF- $\alpha$ ; ‘Media + Enbrel’ = cells treated with TNF- $\alpha$  in the presence of Enbrel, a known TNF inhibitor. Test: Cells treated with TNF- $\alpha$  in the presence of different concentrations of drug. Additional data is shown in the manuscript.

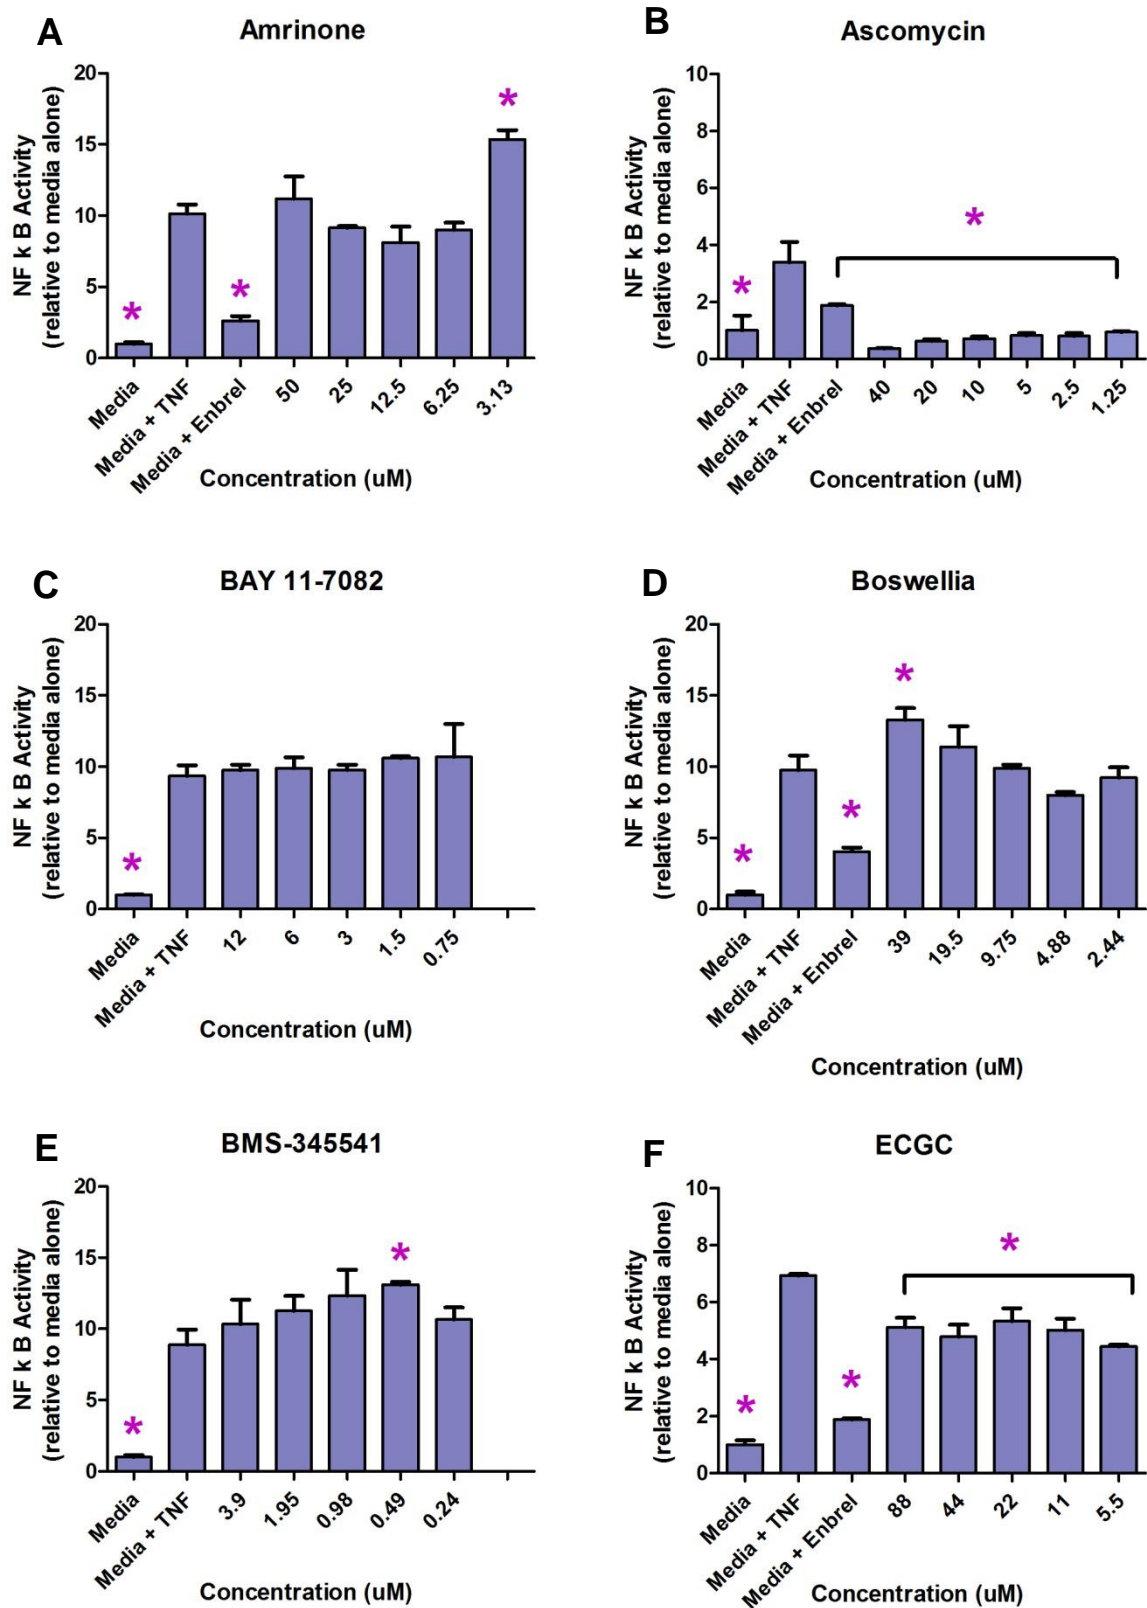

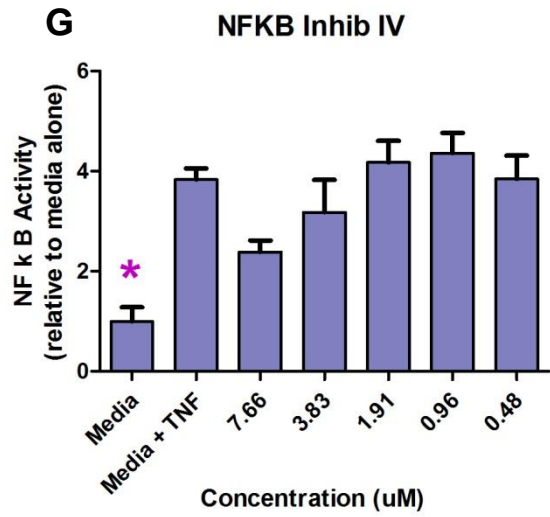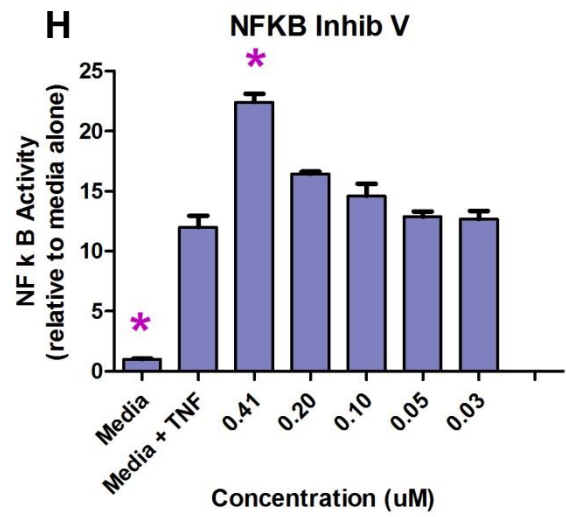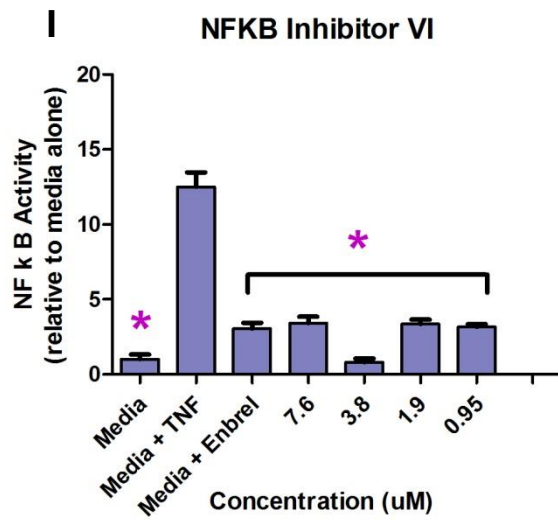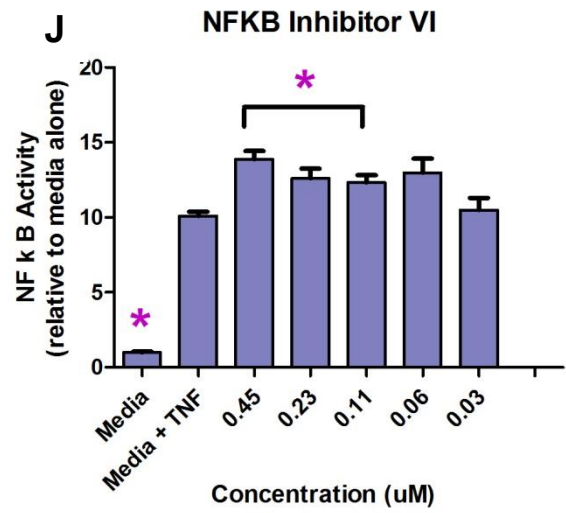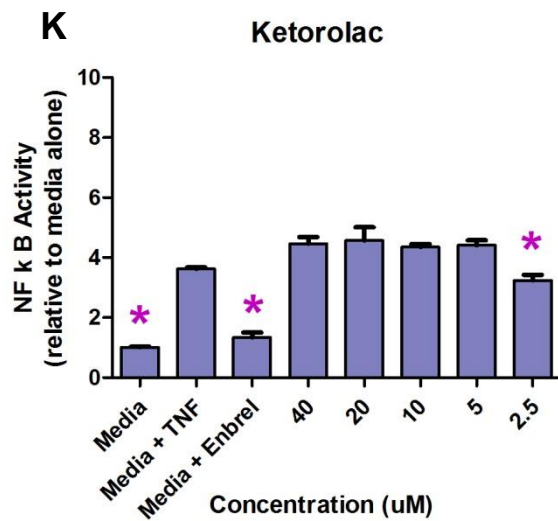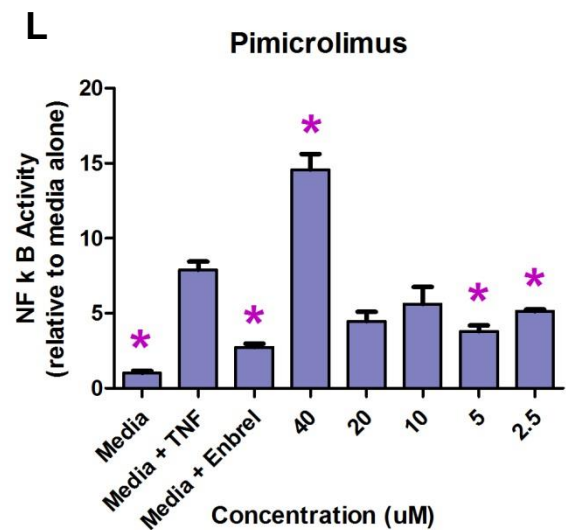

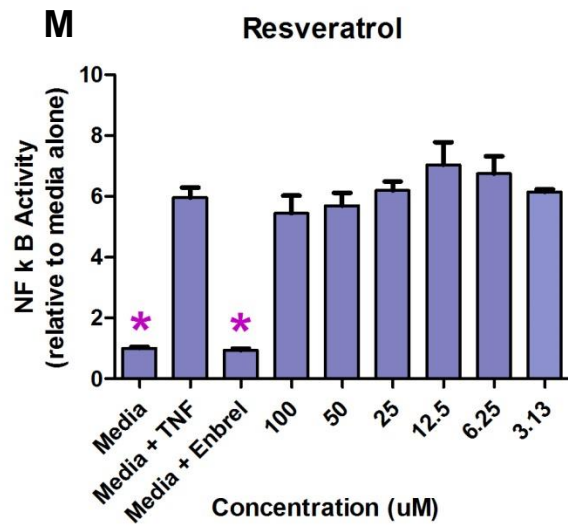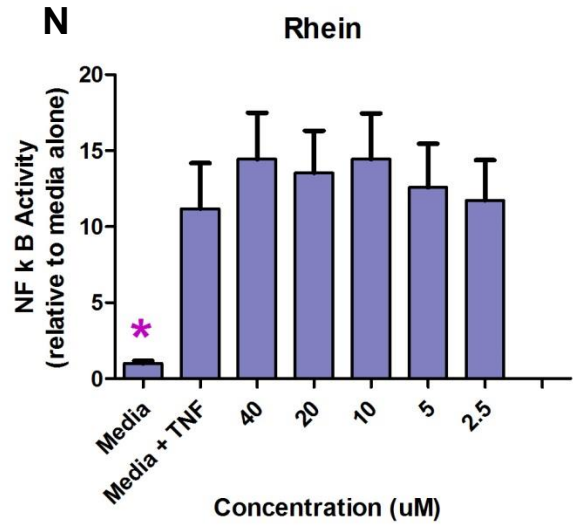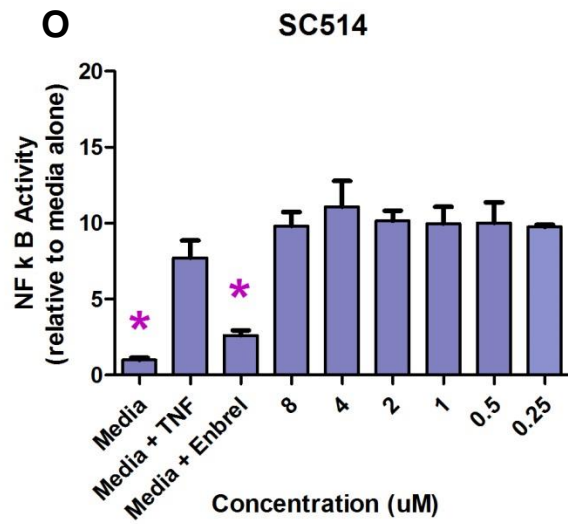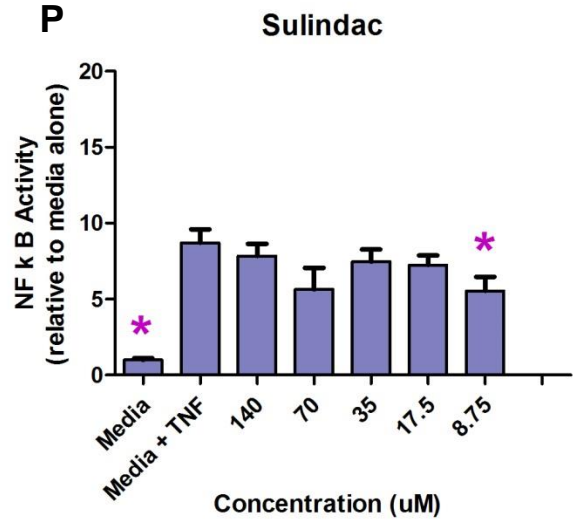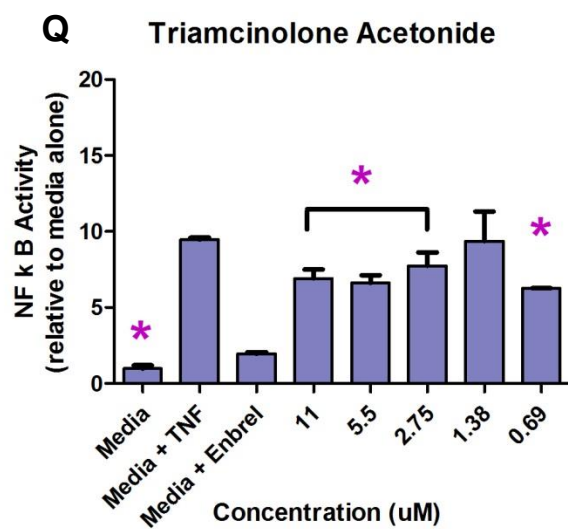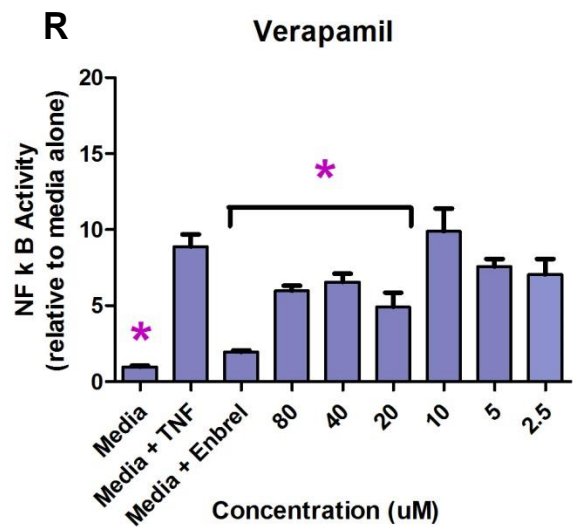

## In Vitro Osteoclastogenesis

Osteoclastogenic activity was measured using BD osteologic plates and quantitation of the degree of bone matrix digestion on the plate surface. Images from the BD Osteologic assay used to measure drug effects on osteoclastogenesis and osteoclast activity are shown in **Figure 5**. The far left pane depicts an example of a control well after removal of cells from matrix. Pseudocoloring of matrix (blue) and pits (green) is shown in the far right pane. A transparent overlay of the two images is shown in the center.

**Figure 5** - Measurement of drug effects on osteoclastogenesis and osteoclast activity.

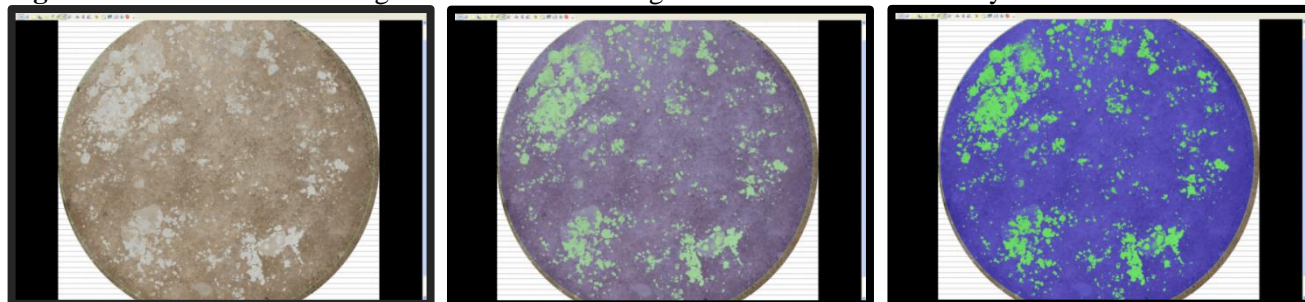

Comparisons were made between RANKL treated control wells and wells treated with both RANKL and drug.

Agents were initially tested either during differentiation or post differentiation in the bone assay (e.g., Figure 2, Sulfazalazine). It was found that this assay was more discerning if the drugs were present from initiation of differentiation with RANKL, likely because matrix degradation began before all cells had completely differentiated. Thus, this assay does not differentiate between effects on differentiation or effects on activity.

A number of agents were effective at inhibiting matrix dissolution. Representative results are shown in **Figures 6 through 9** and were expressed as the mean  $\pm$  SEM (n=4) at the concentrations indicated (\*/\*\*:  $p < 0.05/0.01$ , unpaired t-test versus RANKL control). See Figure 2 in the manuscript for additional data. Most effective were Tacrolimus (2.6 nM was the lowest inhibitory concentration), Pimicrolimus and Ascomycin (10 nM), and Fluocinolone (9.77 nM). Others that were effective, but not at such low concentrations, were Triamcinolone hexacetonide (297 nM), Tranilast (500 nM), IKK2 VIII inhibitor (500 nM), Withaferin A (530 nM), Alendronate (1.25  $\mu$ M), Resveratrol (6.25  $\mu$ M), clonidine (10  $\mu$ M), CORM-2 (20  $\mu$ M), and Triamcinolone acetone (250  $\mu$ M). Alendronate was included as a control. Both Triamcinolones were formulated for clinical use, and so it is possible that the different excipients influenced in vitro solubility and the significantly different results. Because Triamcinolone hexacetonide was most effective, this is the formulation used in vivo.

**Figure 6.** Effect of sulfasalazine on osteoclast differentiation vs. mature activity.

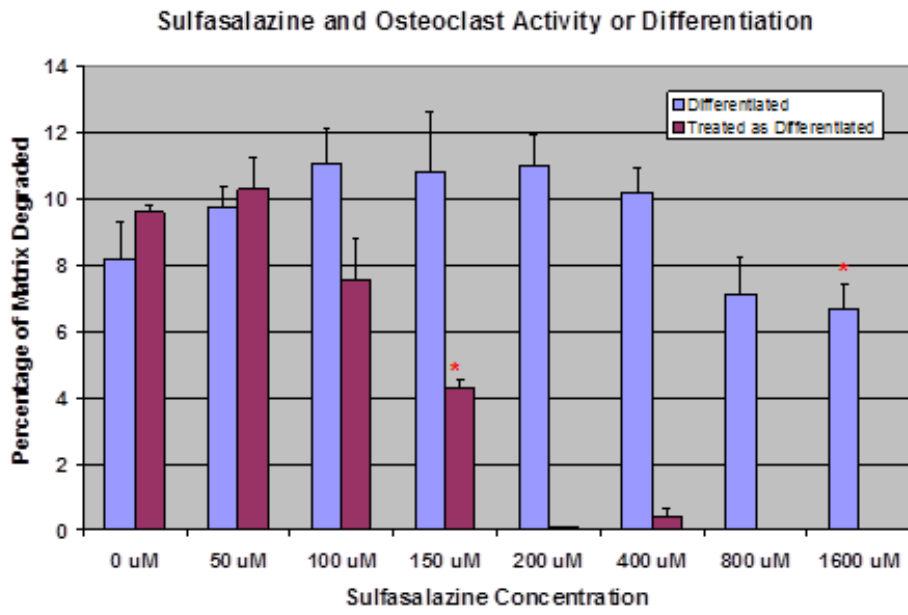

**Figure 7** – Effects of different drugs on osteoclastogenesis and degradation of bone matrix.

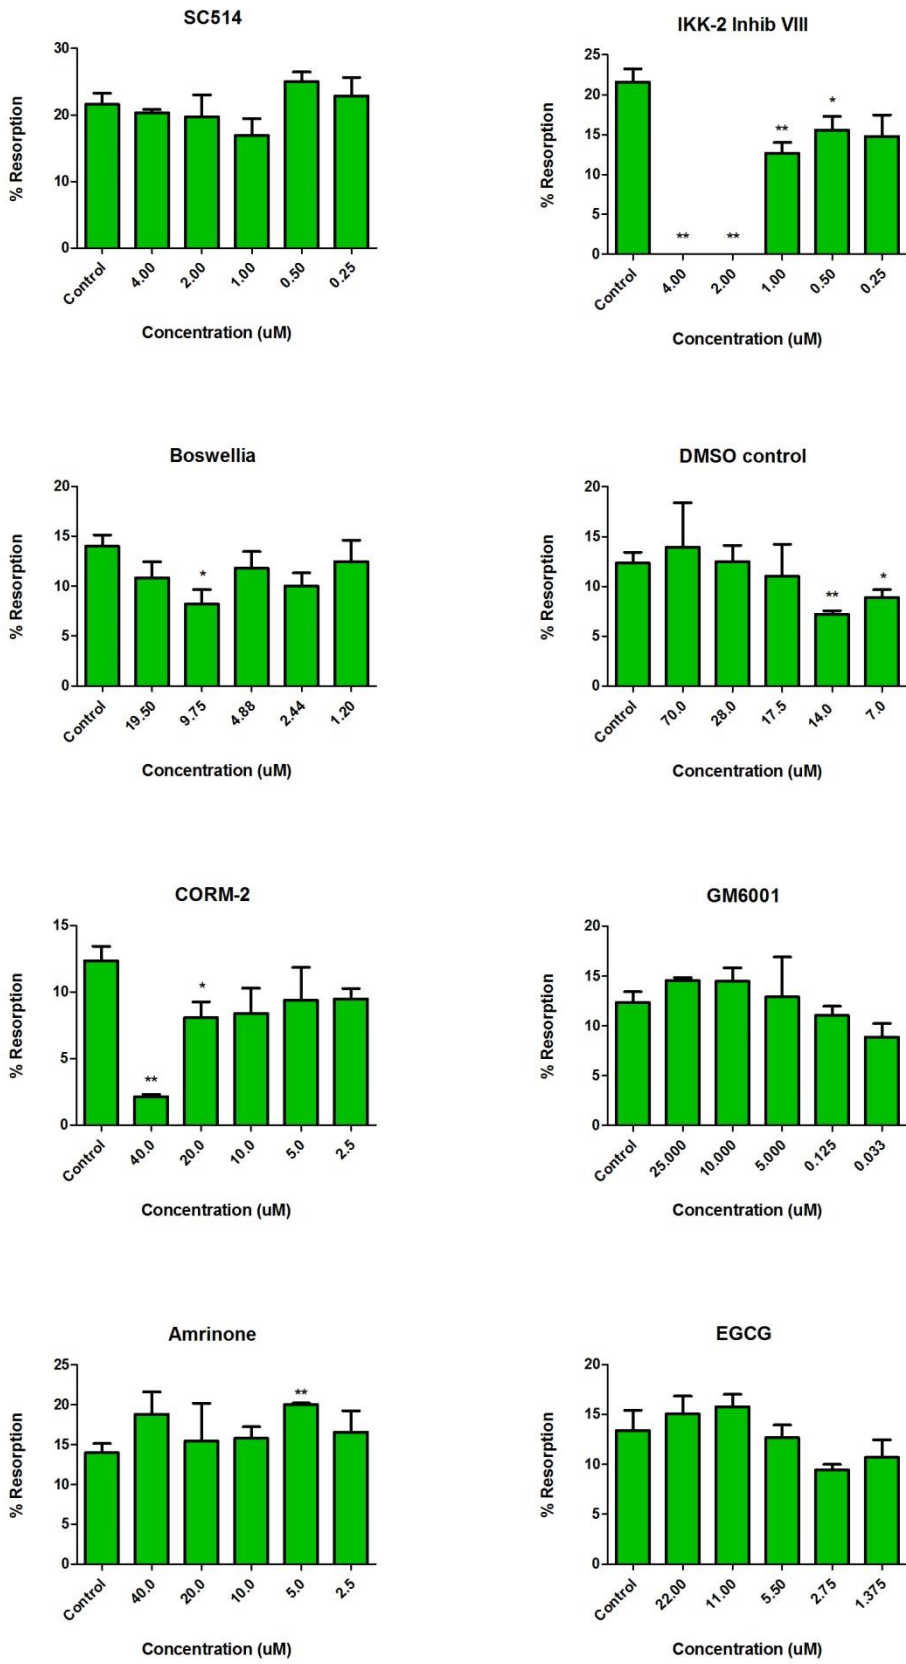



**Figure 8** - Effects of different drugs on osteoclastogenesis and degradation of bone matrix.

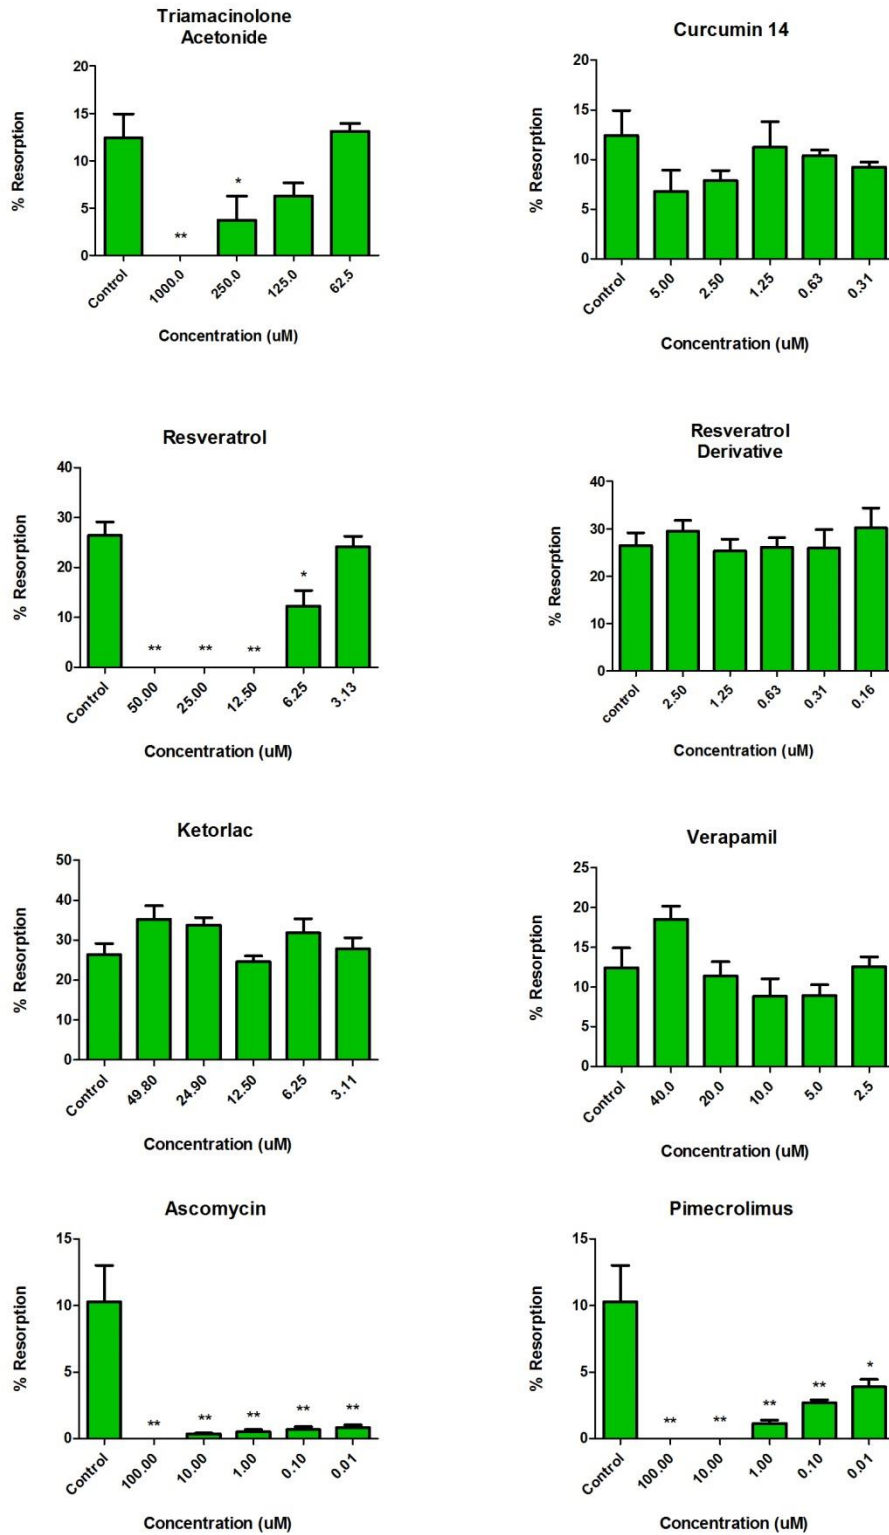

**Figure 9** - Effects of different drugs on osteoclastogenesis and degradation of bone matrix.

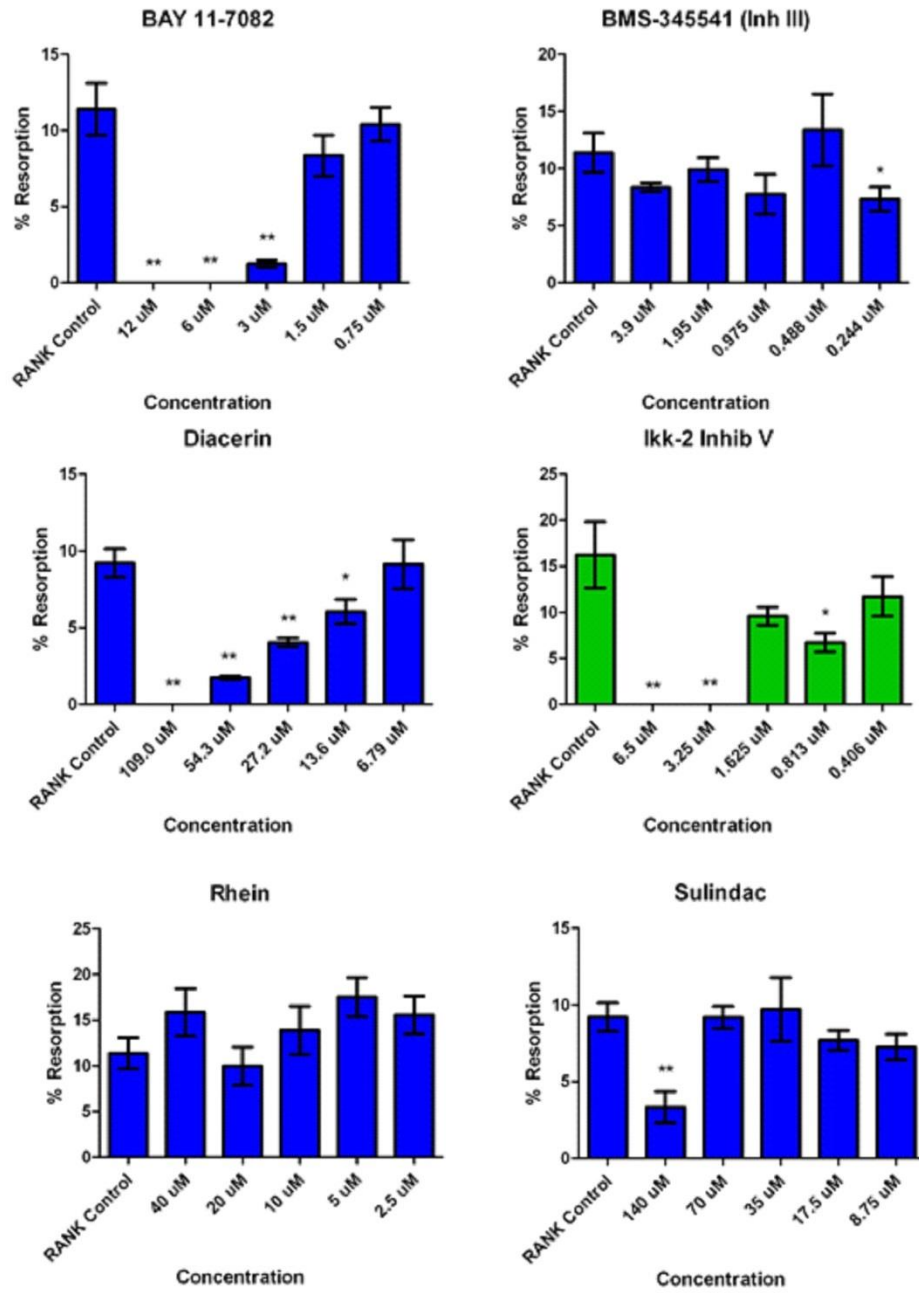

## In Vitro MMP-13 Activity

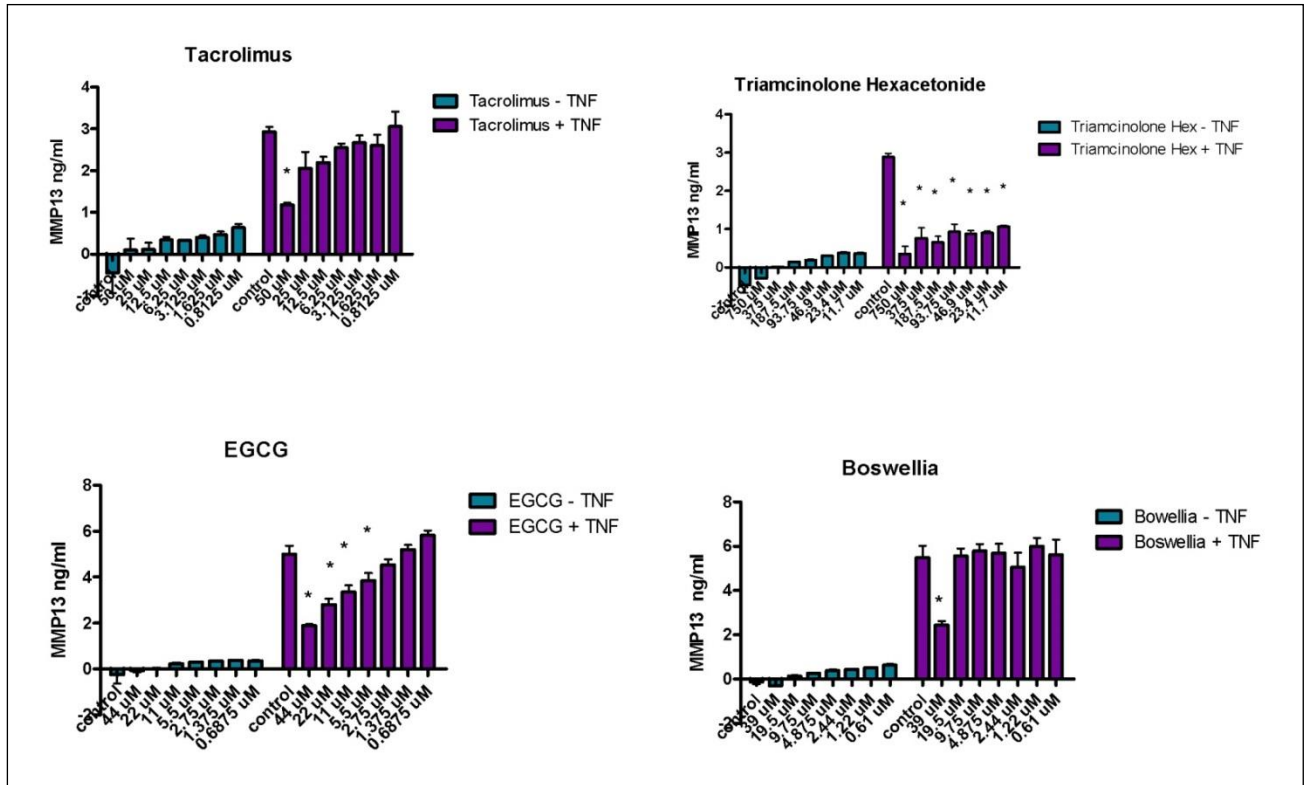

**Figure 10** - Effects of Epigallocatechin Gallate (EGCG), Tacrolimus, Triamcinolone Hexacetonide and 3-O-Acetyl-11-keto-β-Boswellic Acid (Boswellia) on MMP-13 levels.

Effects of Epigallocatechin Gallate (EGCG), Tacrolimus, Triamcinolone Hexacetonide and 3-O-Acetyl-11-keto-β-Boswellic Acid (Boswellia) on MMP-13 levels in cell culture supernatants from chondrogenic micro-pellets in the presence and absence of TNF-α stimulation. Shown is the mean  $\pm$  SD (n=3) at the indicated concentrations. (\*: p<0.05, one-way ANOVA with Dunnet's post-test compared to no drug controls with and without TNF-α).

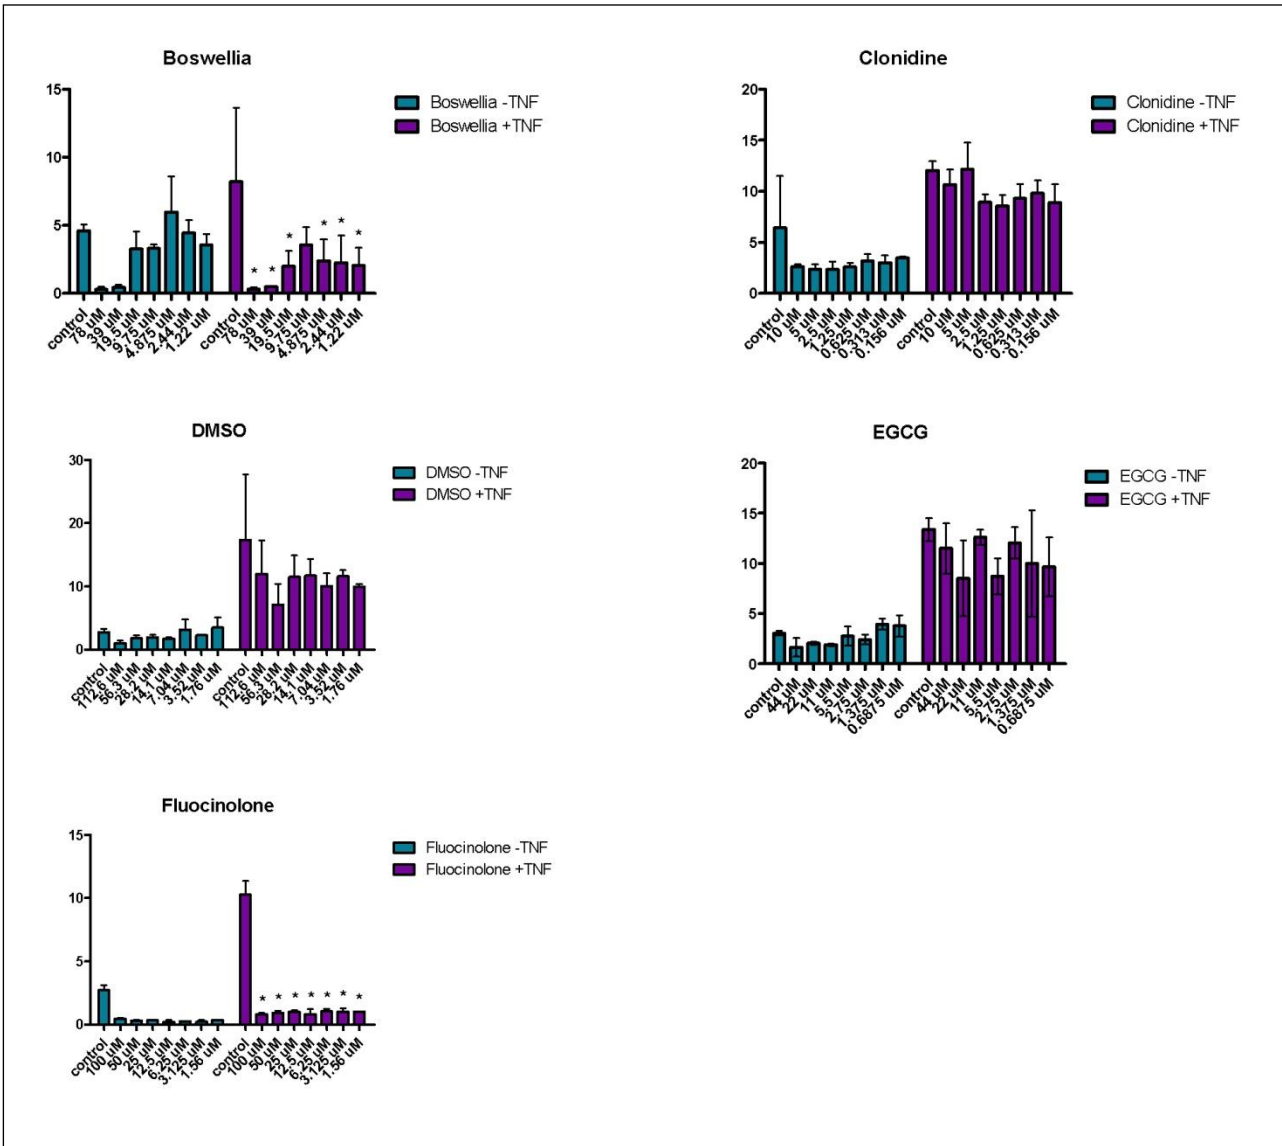

**Figure 11** - Effects of Epigallocatechin Gallate (EGCG), Dimethyl Sulfoxide (DMSO), Clonidine, Fluocinolone and 3-O-Acetyl-11-keto-β-Boswellic Acid (Boswellia) on MMP-13 levels

Effects of Epigallocatechin Gallate (EGCG), Dimethyl Sulfoxide (DMSO), Clonidine, Fluocinolone and 3-O-Acetyl-11-keto-β-Boswellic Acid (Boswellia) on MMP-13 levels in cell culture supernatants from chondrogenic micro-pellets in the presence and absence of TNF-α stimulation. Shown is the mean +/- SD (n=3) at the indicated concentrations. (\* : p<0.05, one-way ANOVA with Dunnet's post-test compared to no drug controls with and without TNF-α).

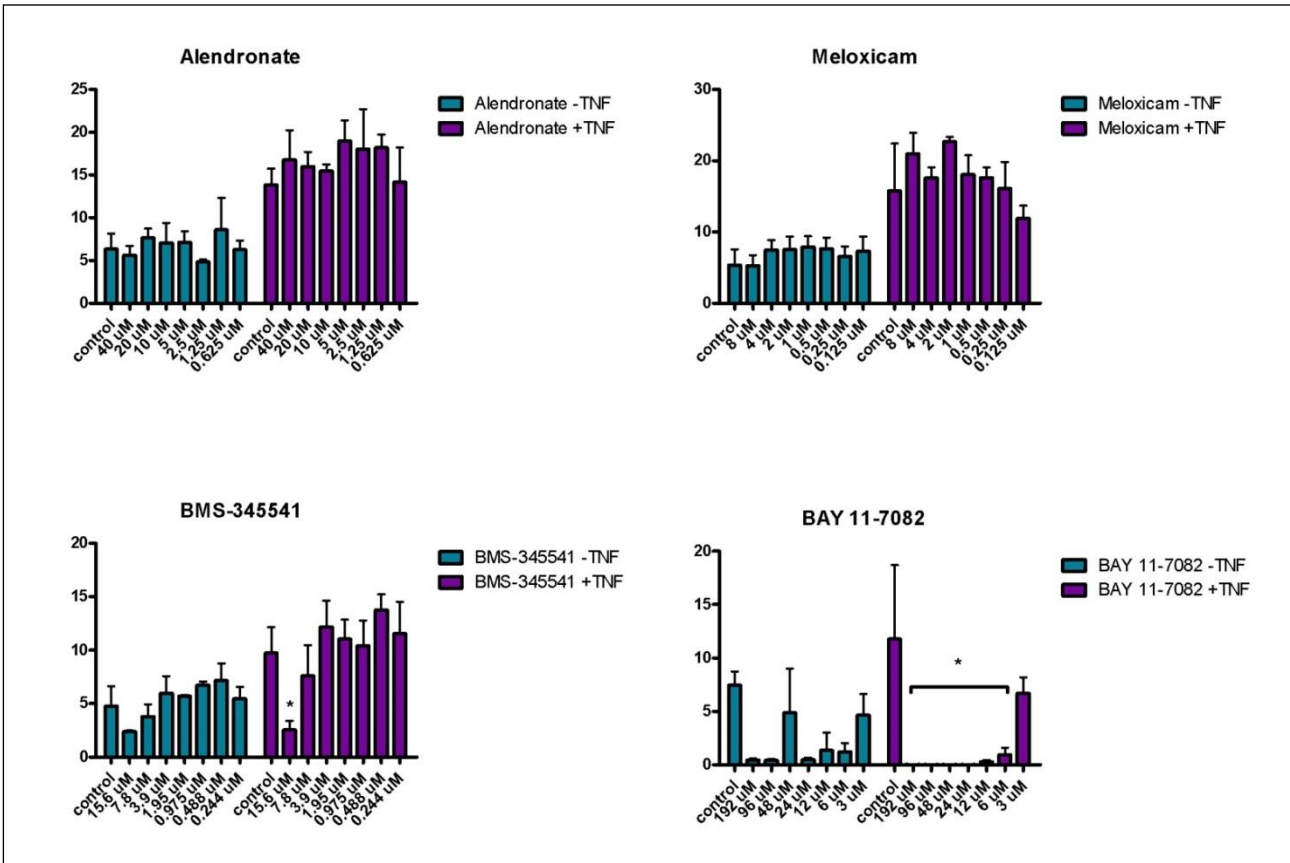

**Figure 12** - Effects of BAY 11-7082, BMS-345541, Alendronate and Meloxicam on MMP-13 levels.

Effects of BAY 11-7082, BMS-345541, Alendronate and Meloxicam on MMP-13 levels in cell culture supernatants from chondrogenic micro-pellets in the presence and absence of TNF- $\alpha$  stimulation. Shown is the mean  $\pm$  SD (n=3) at the indicated concentrations. (\* : p<0.05, one-way ANOVA with Dunnet's post-test compared to no drug controls with and without TNF- $\alpha$ ). Note that Bay 11-7082 and BMS-345541 and were repeated (Figure 16 and 17, respectively).

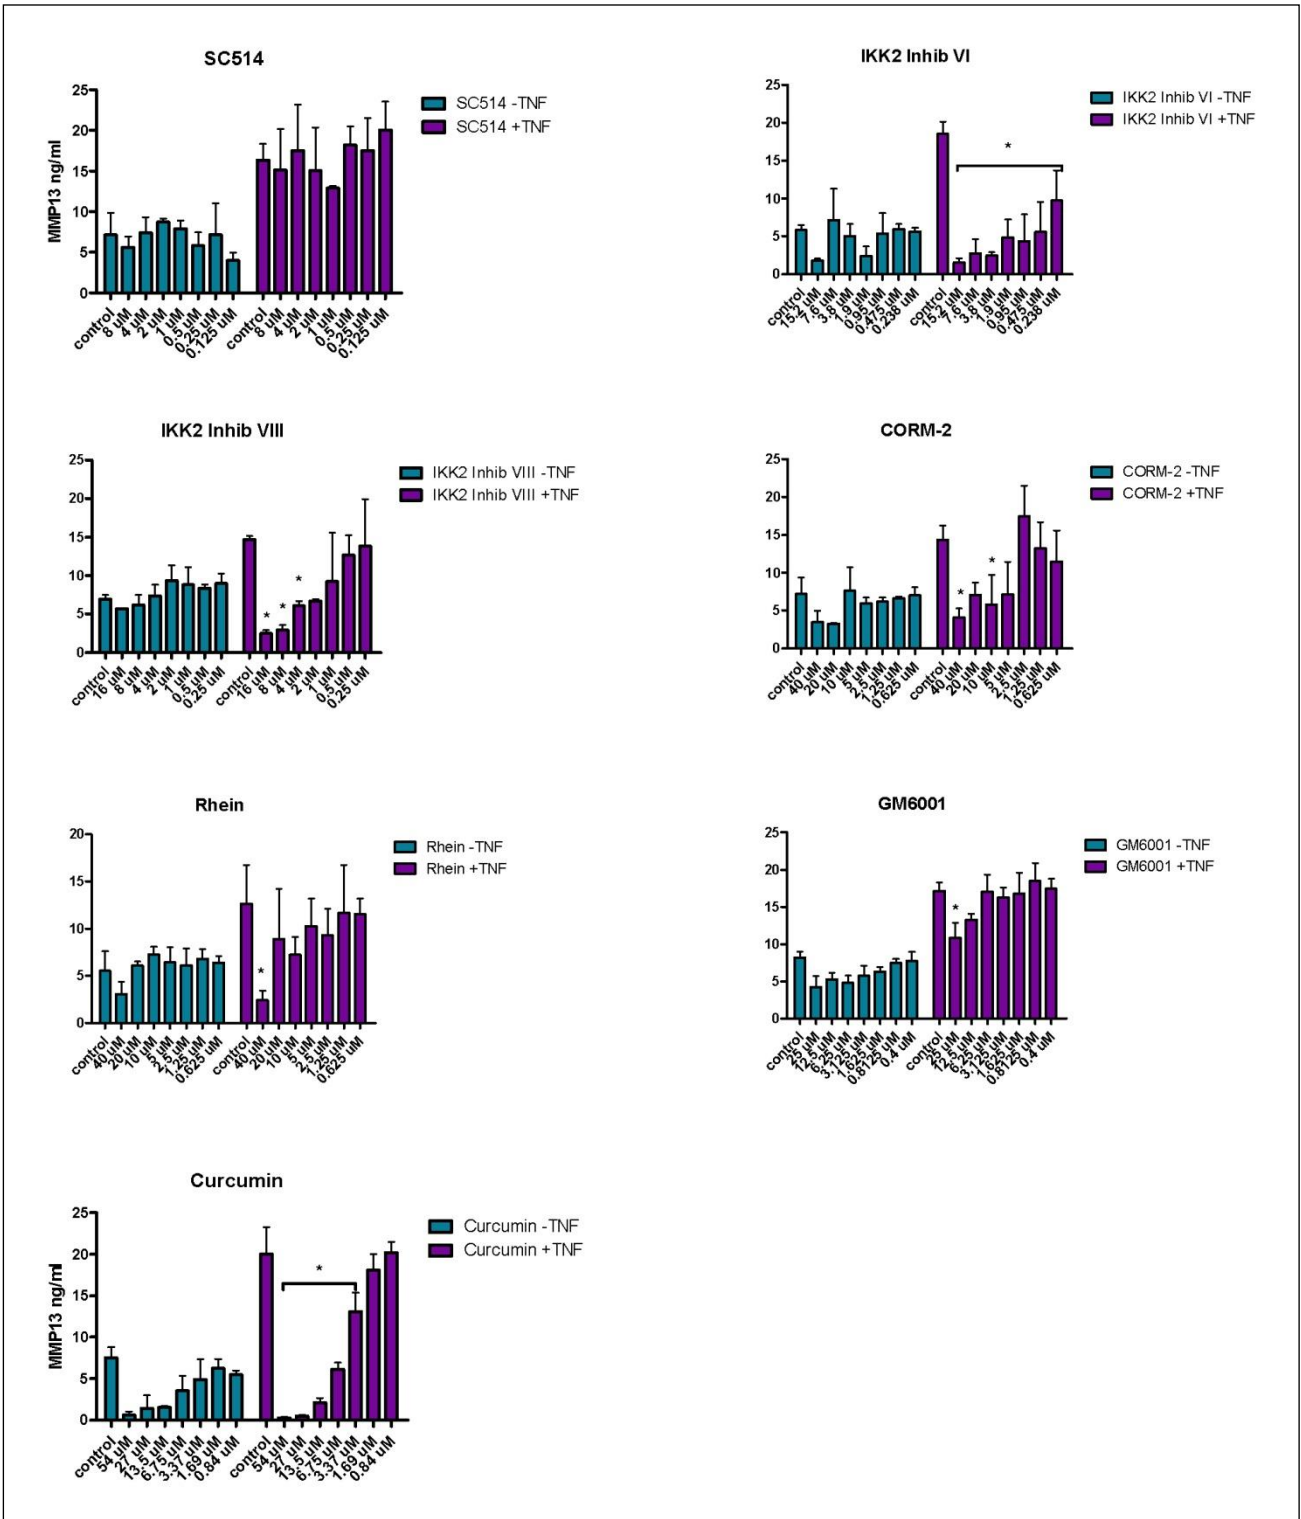

**Figure 13** - Effects of IKK-2 Inhibitor VI, IKK-2 Inhibitor VIII, CORM-2, Rhein, GM6001, Curcumin and SC514 on MMP-13 levels.

Effects of IKK-2 Inhibitor VI, IKK-2 Inhibitor VIII, CORM-2, Rhein, GM6001, Curcumin and SC514 on MMP-13 levels in cell culture supernatants from chondrogenic micro-pellets in the presence and absence of TNF- $\alpha$  stimulation. Shown is the mean  $\pm$  SD (n=3) at the indicated concentrations. (\* : p<0.05, one-way ANOVA with Dunnet's post-test compared to no drug controls with and without TNF- $\alpha$ ).

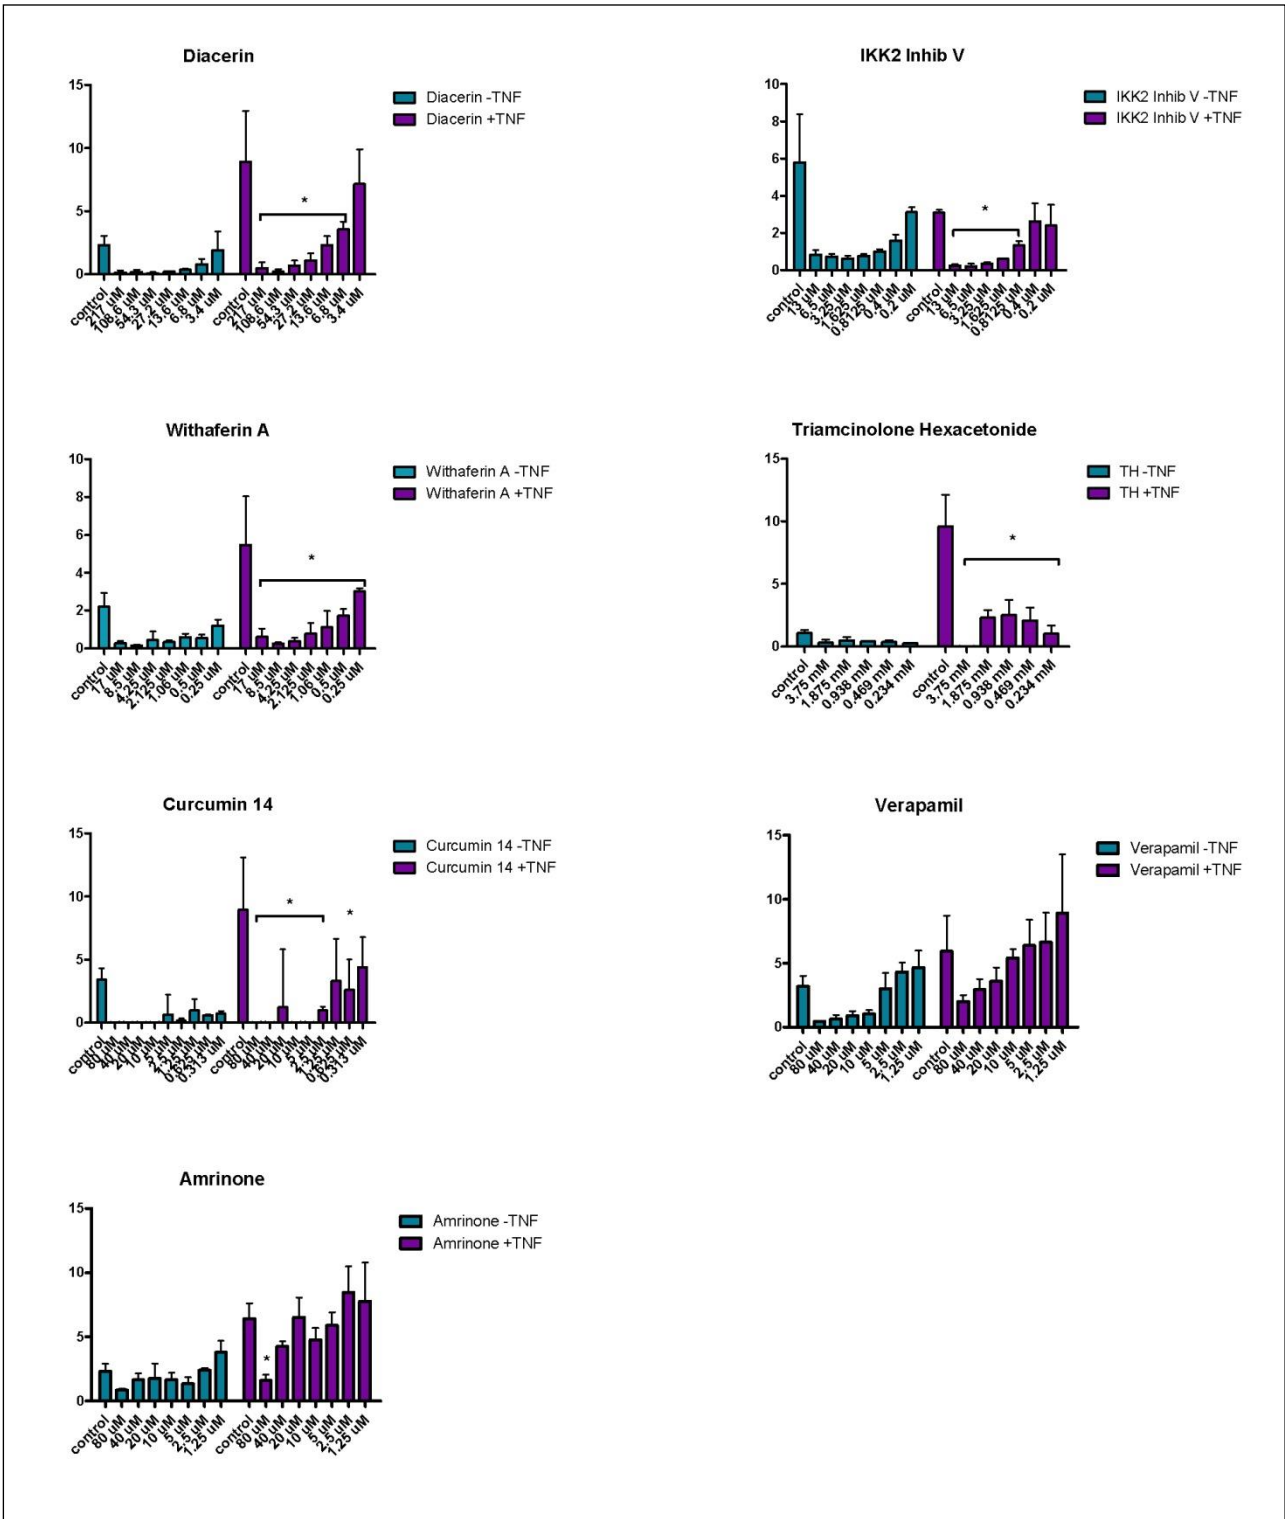

**Figure 14** - Effects of Diacerin, IKK-2 Inhibitor V, Withaferin A, Triamcinolone Hexacetonide, Curcumin 14 and Amrinone on MMP-13 levels.

Effects of Diacerin, IKK-2 Inhibitor V, Withaferin A, Triamcinolone Hexacetonide, Curcumin 14 and Amrinone on MMP-13 levels in cell culture supernatants from chondrogenic micro-pellets in the presence and absence of TNF- $\alpha$  stimulation. Shown is the mean  $\pm$  SD (n=3) at the indicated concentrations. (\* : p<0.05, one-way ANOVA with Dunnet's post-test compared to no drug controls with and without TNF- $\alpha$ ).

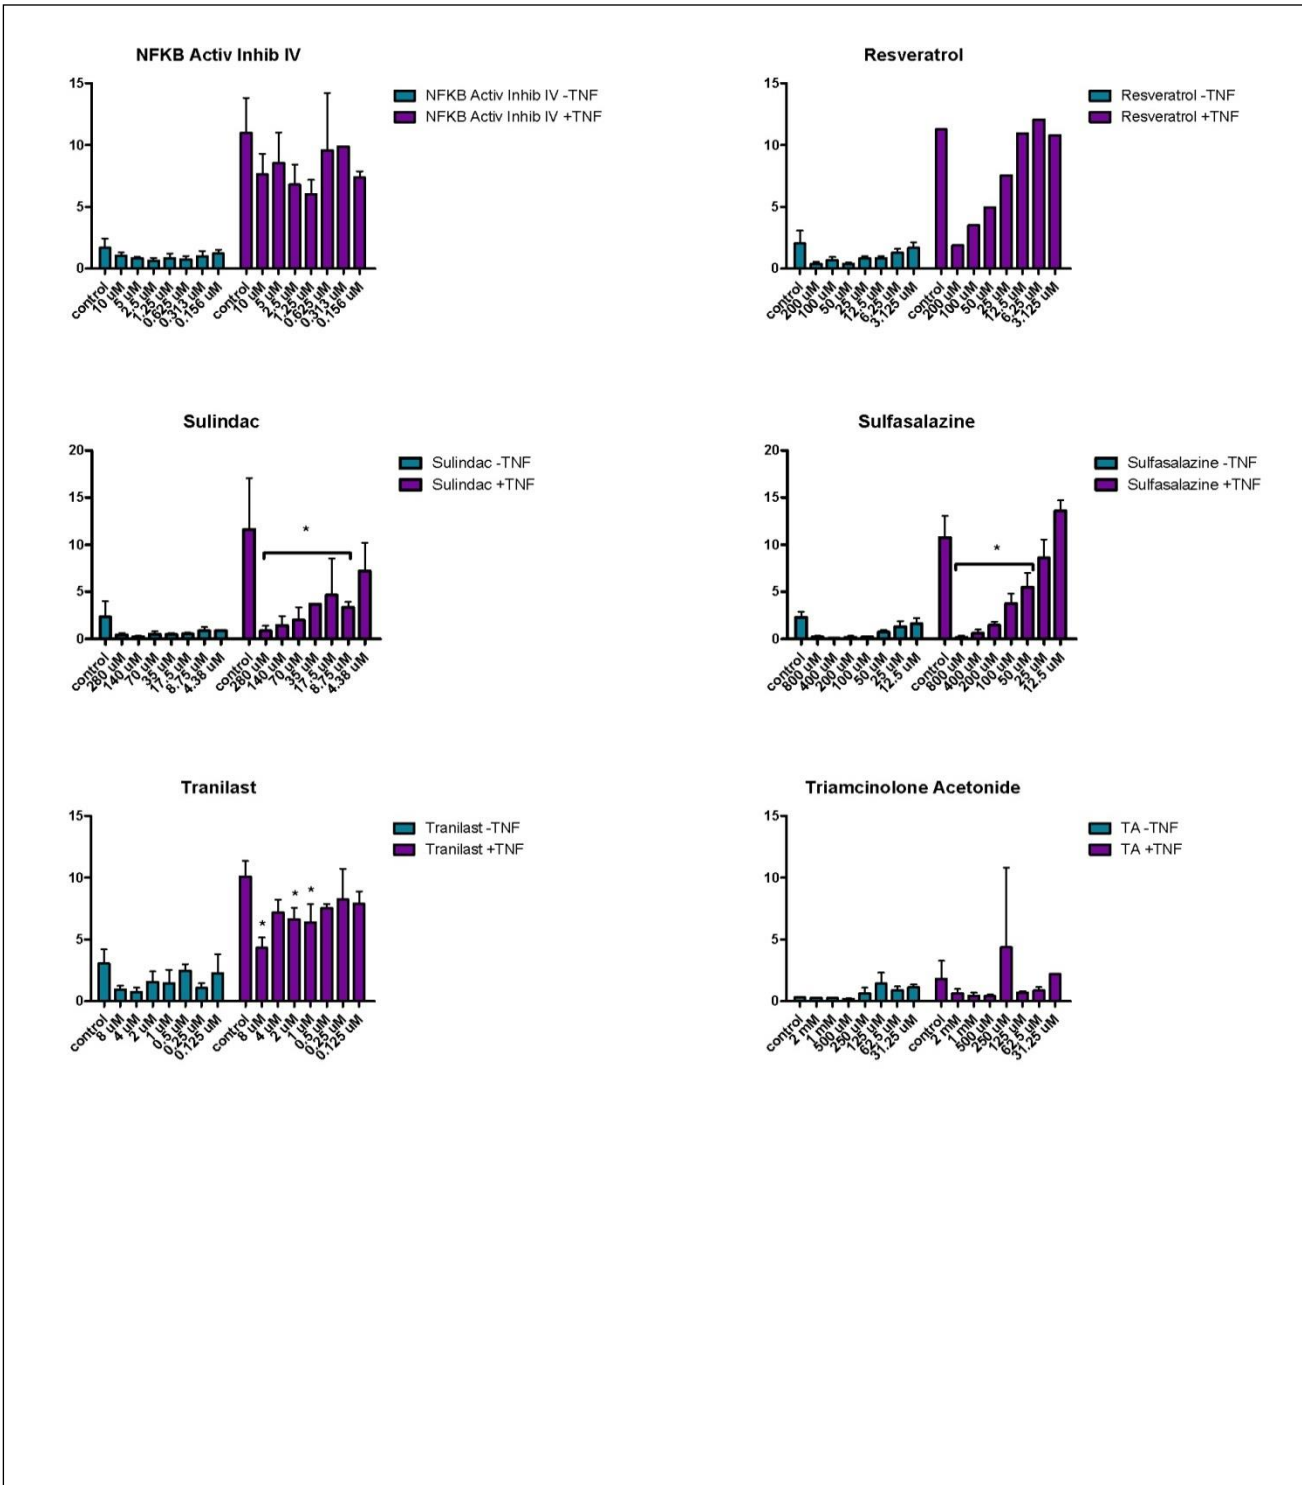

**Figure 15** - Effects of Triamcinolone Acetonide, NFkB Activation Inhibitor IV, Sulindac, Sulfasalazine, Tranilast and Resveratrol on MMP-13 levels.

Effects of Triamcinolone Acetonide (TA), NFkB Activation Inhibitor IV, Sulindac, Sulfasalazine, Tranilast and Resveratrol on MMP-13 levels in cell culture supernatants from chondrogenic micro-pellets in the presence and absence of TNF- $\alpha$  stimulation. Shown is the mean  $\pm$  SD (n=3) at the indicated concentrations. (\* : p<0.05, one-way ANOVA with Dunnet's post-test compared to no drug controls with and without TNF- $\alpha$ ). The resveratrol + TNF- $\alpha$  group is only n=1 due to lack of viable pellets for the assay. Note that TA was repeated in the experiment of Figure 18.



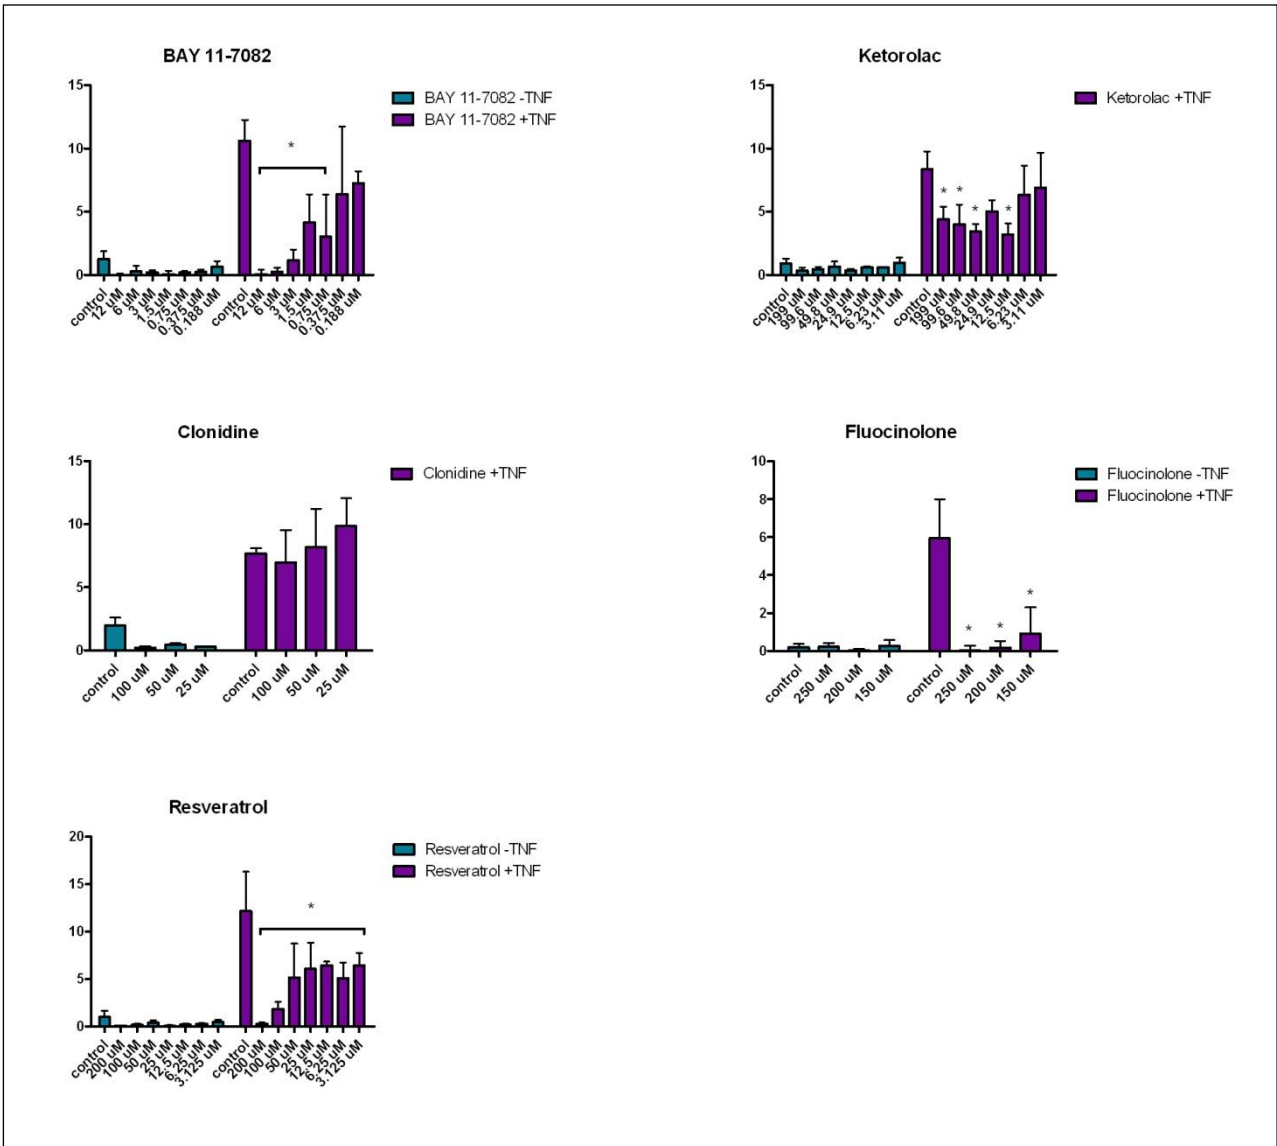

**Figure 16 - Effects of BAY 11-7082, Ketorolac, Clonidine, Resveratrol, and Flucinolone on MMP-13 levels.** Effects of BAY 11-7082, Ketorolac, Clonidine, Resveratrol, and Flucinolone on MMP-13 levels in cell culture supernatants from chondrogenic micro-pellets in the presence and absence of TNF- $\alpha$  stimulation (experiment #9). Shown is the mean  $\pm$  SD (n=3) at the indicated concentrations. (\* : p<0.05, one-way ANOVA with Dunnet’s post-test compared to no drug controls with and without TNF- $\alpha$ ).

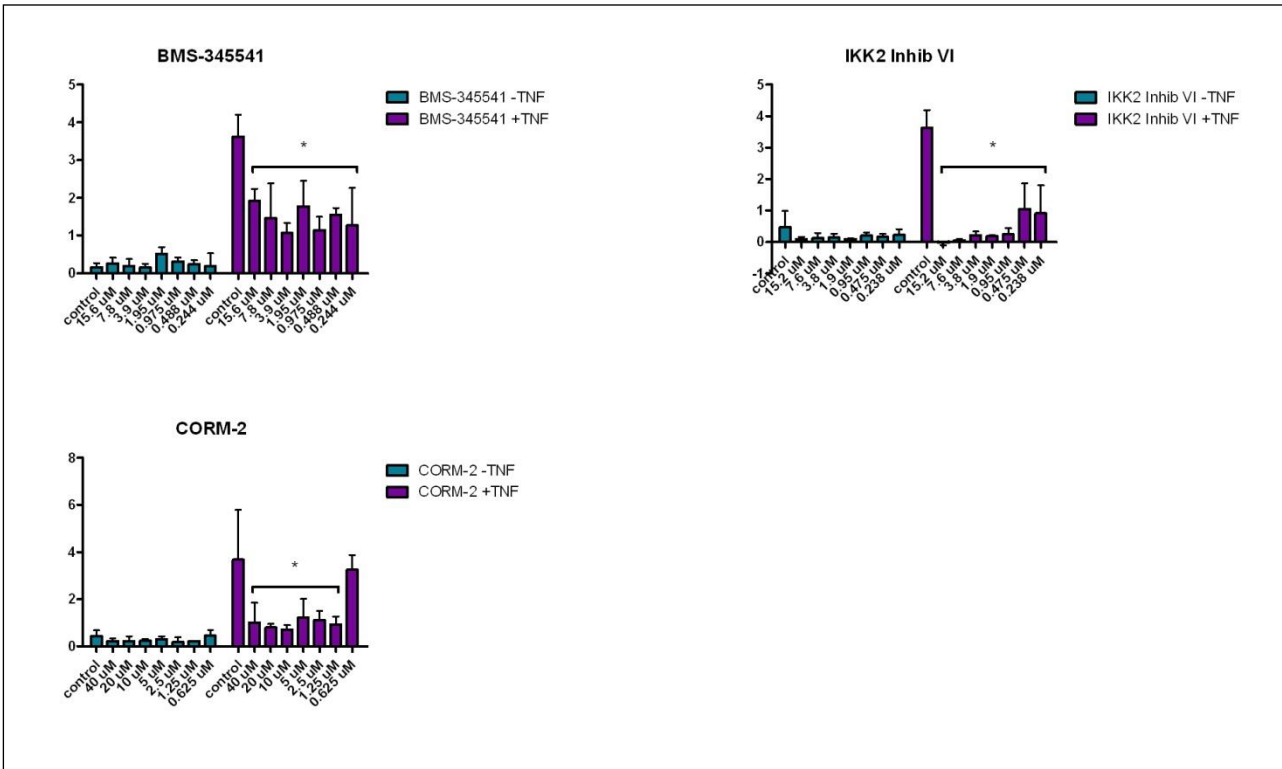

**Figure 17** - Effects of BMS-345541 (IKK-2 Inhibitor III), IKK-2 Inhibitor VI and CORM-2 on MMP-13 levels.

Effects of BMS-345541 (IKK-2 Inhibitor III), IKK-2 Inhibitor VI and CORM-2 on MMP-13 levels in cell culture supernatants from chondrogenic micro-pellets in the presence and absence of TNF- $\alpha$  stimulation. Shown is the mean  $\pm$  SD (n=3) at the indicated concentrations. (\* : p<0.05, one-way ANOVA with Dunnet's post-test compared to no drug controls with and without TNF- $\alpha$ ).

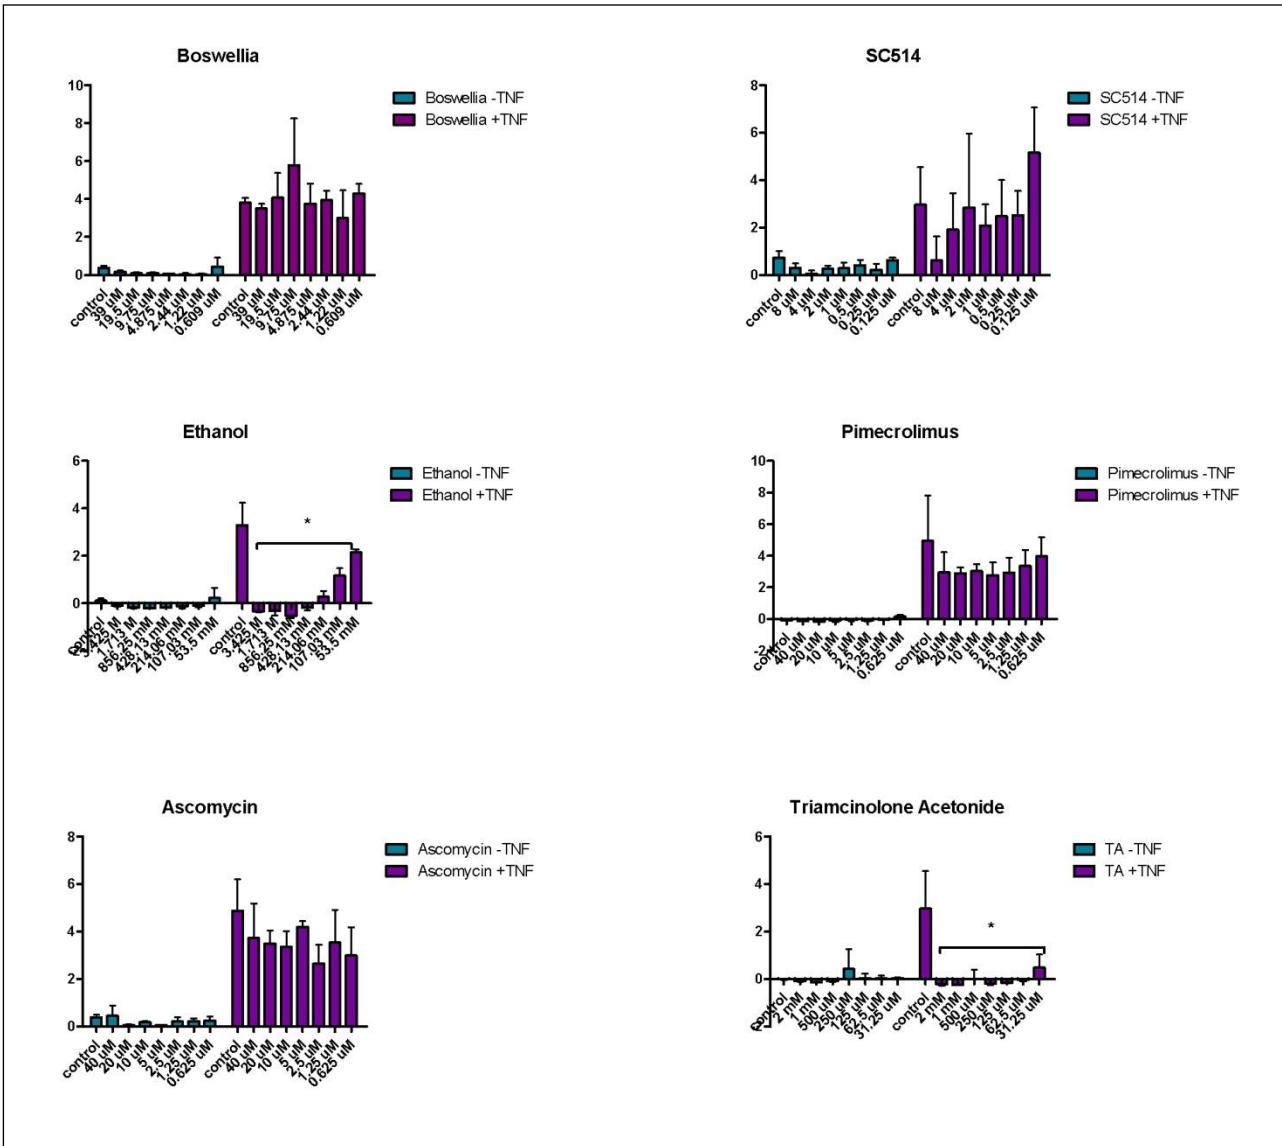

**Figure 18** - Effects of Pimecrolimus, Ethanol, Ascomycin, Boswellia, SC514 and Triamcinolone Acetonide on MMP-13 levels.

Effects of Pimecrolimus, Ethanol, Ascomycin, Boswellia, SC514 and Triamcinolone Acetonide on MMP-13 levels in cell culture supernatants from chondrogenic micro-pellets in the presence and absence of TNF-α stimulation. Shown is the mean +/- SD (n=3) at the indicated concentrations. (\*: p<0.05, one-way ANOVA with Dunnet's post-test compared to no drug controls with and without TNF-α). Triamcinolone Acetonide was repeated in this set of assays due to a problem with the control wells in Figure 15.

## In Vitro Toxicity Testing

### In Vitro Toxicity Testing with a Synovial Cell Line

Compounds were tested for synovial toxicity using SW982 cells alone or in the presence of TNF as shown in **Figures 19-27** below. Most agents were toxic only at very high concentrations, with Bay11-7082 demonstrating notable toxicity at 12  $\mu$ M. This compound was much less toxic to HeLa cells, as shown in **Table 1**.

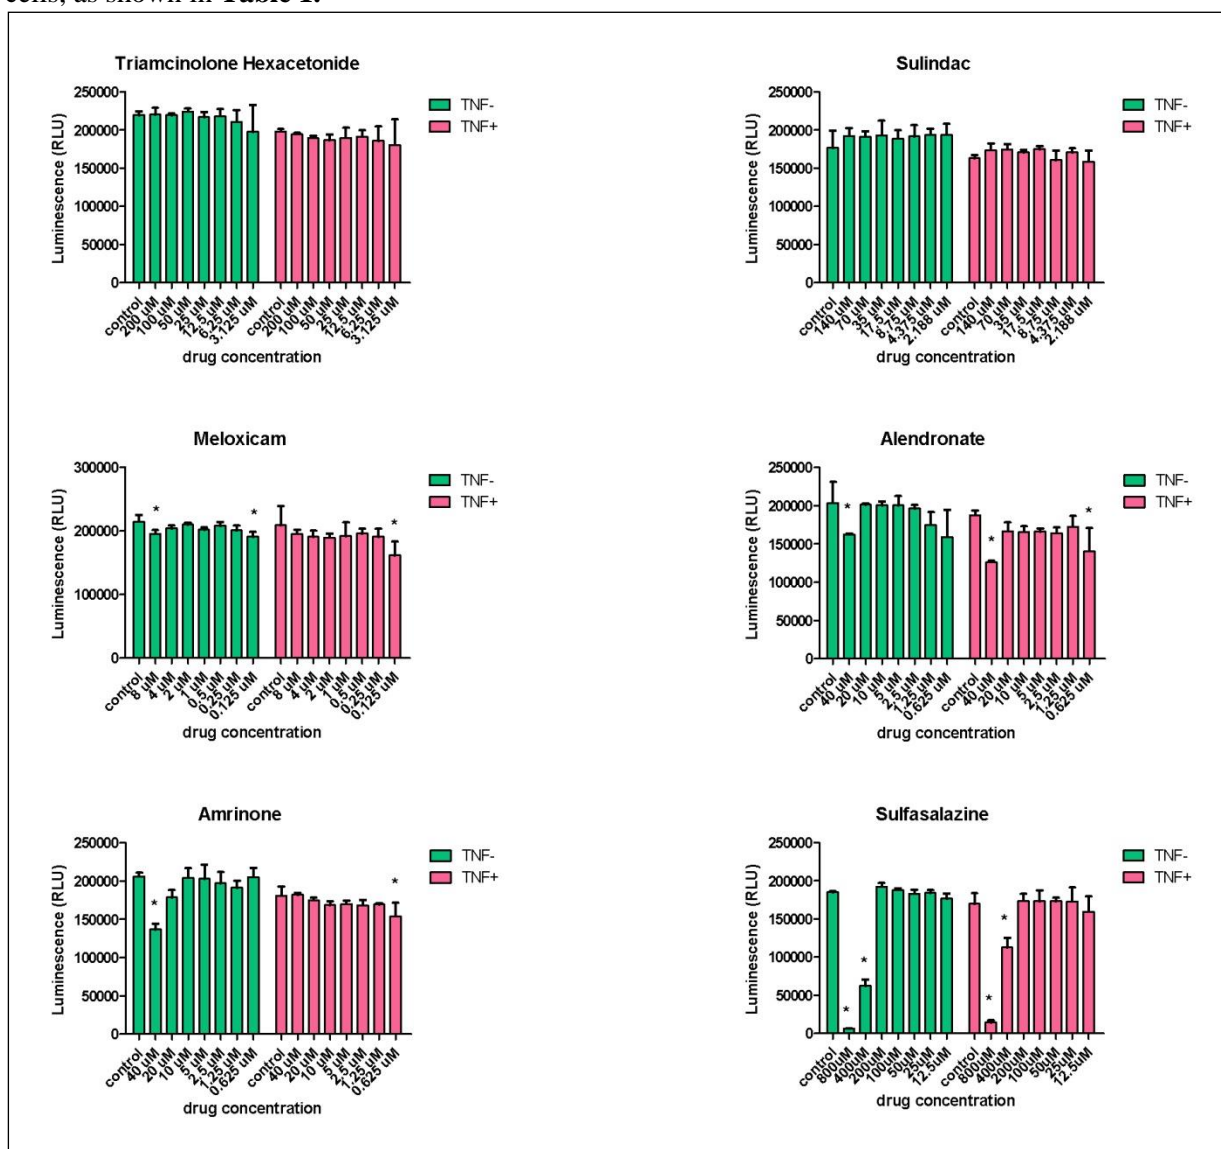

**Figure 19** – Effects of Triamcinolone Hexacetonide, Sulindac, Meloxicam, Alendronate, Amrinone and Sulfasalazine on viability of synovial sarcoma cells (SW982) +/-TNF-alpha

The effects of Triamcinolone Hexacetonide, Sulindac, Meloxicam, Alendronate, Amrinone and Sulfasalazine on the viability of synovial sarcoma cells (SW982) in the presence and absence of TNF-alpha stimulation are shown in **Figure 19**. Shown is the mean +/- SD (n=3) at the indicated concentrations. (p<0.05, one-way ANOVA with Dunnet's post-test compared to no drug controls with and without TNF-alpha).

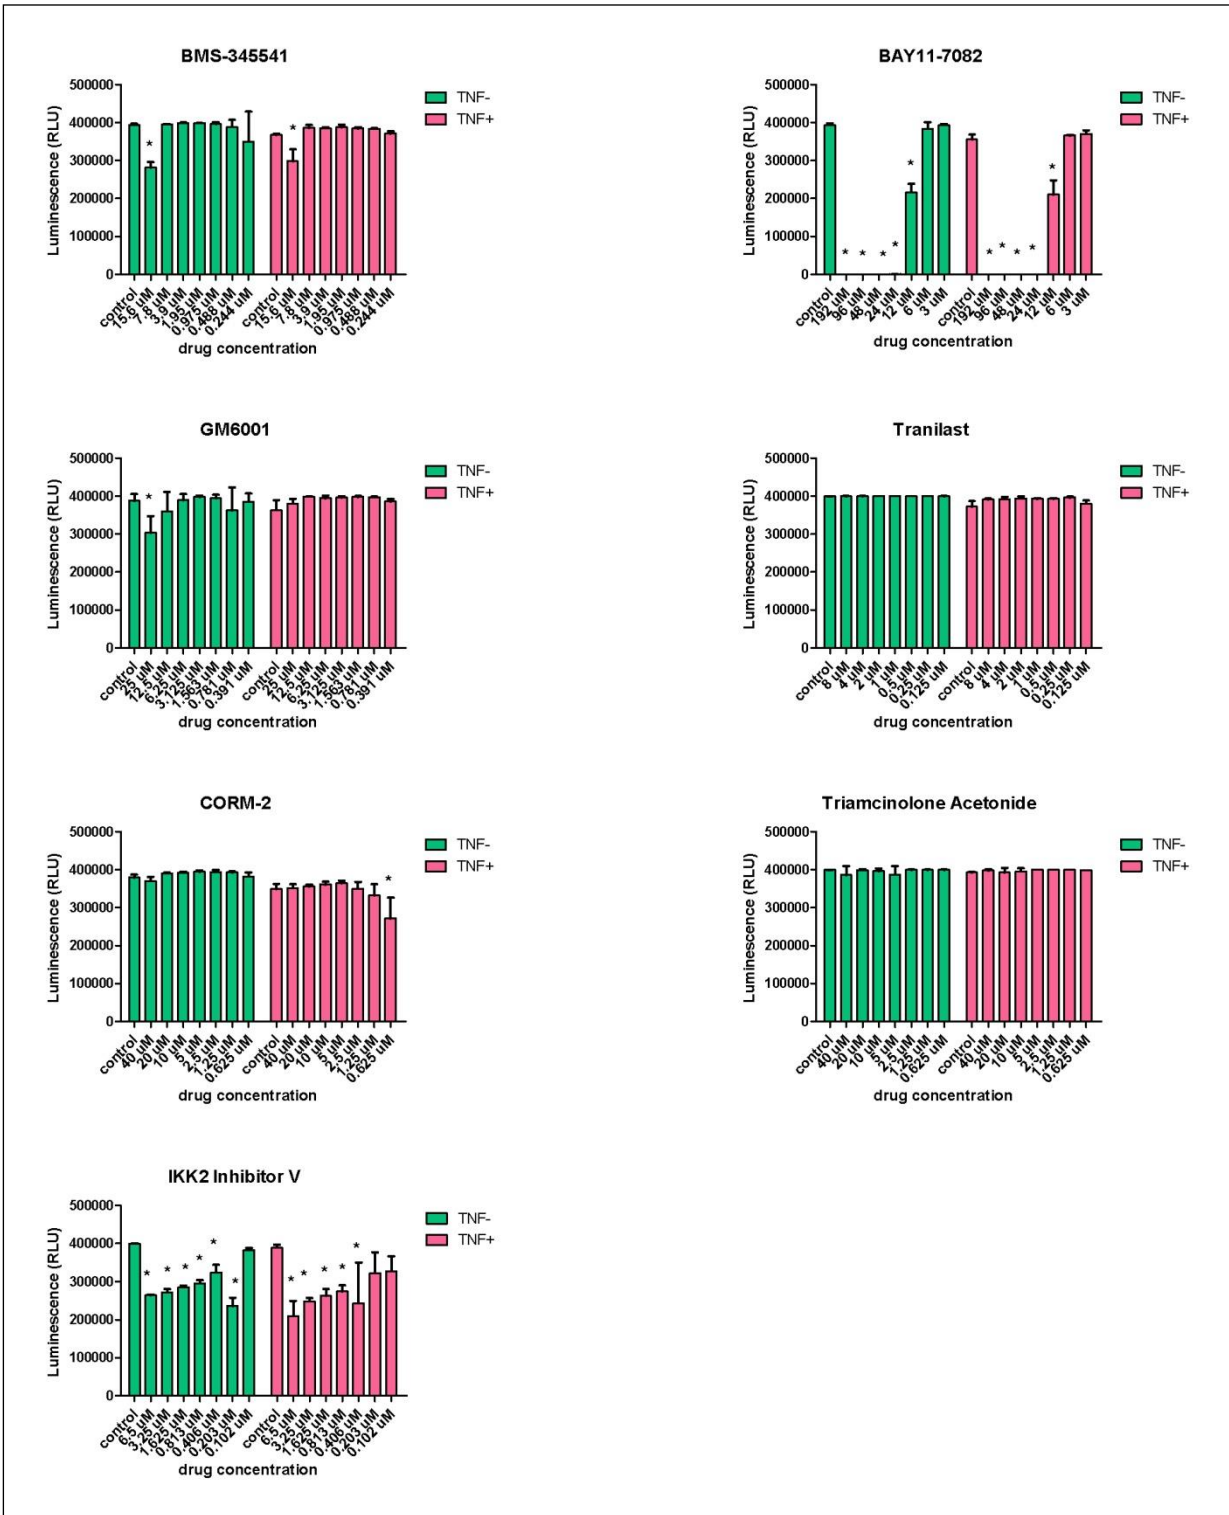

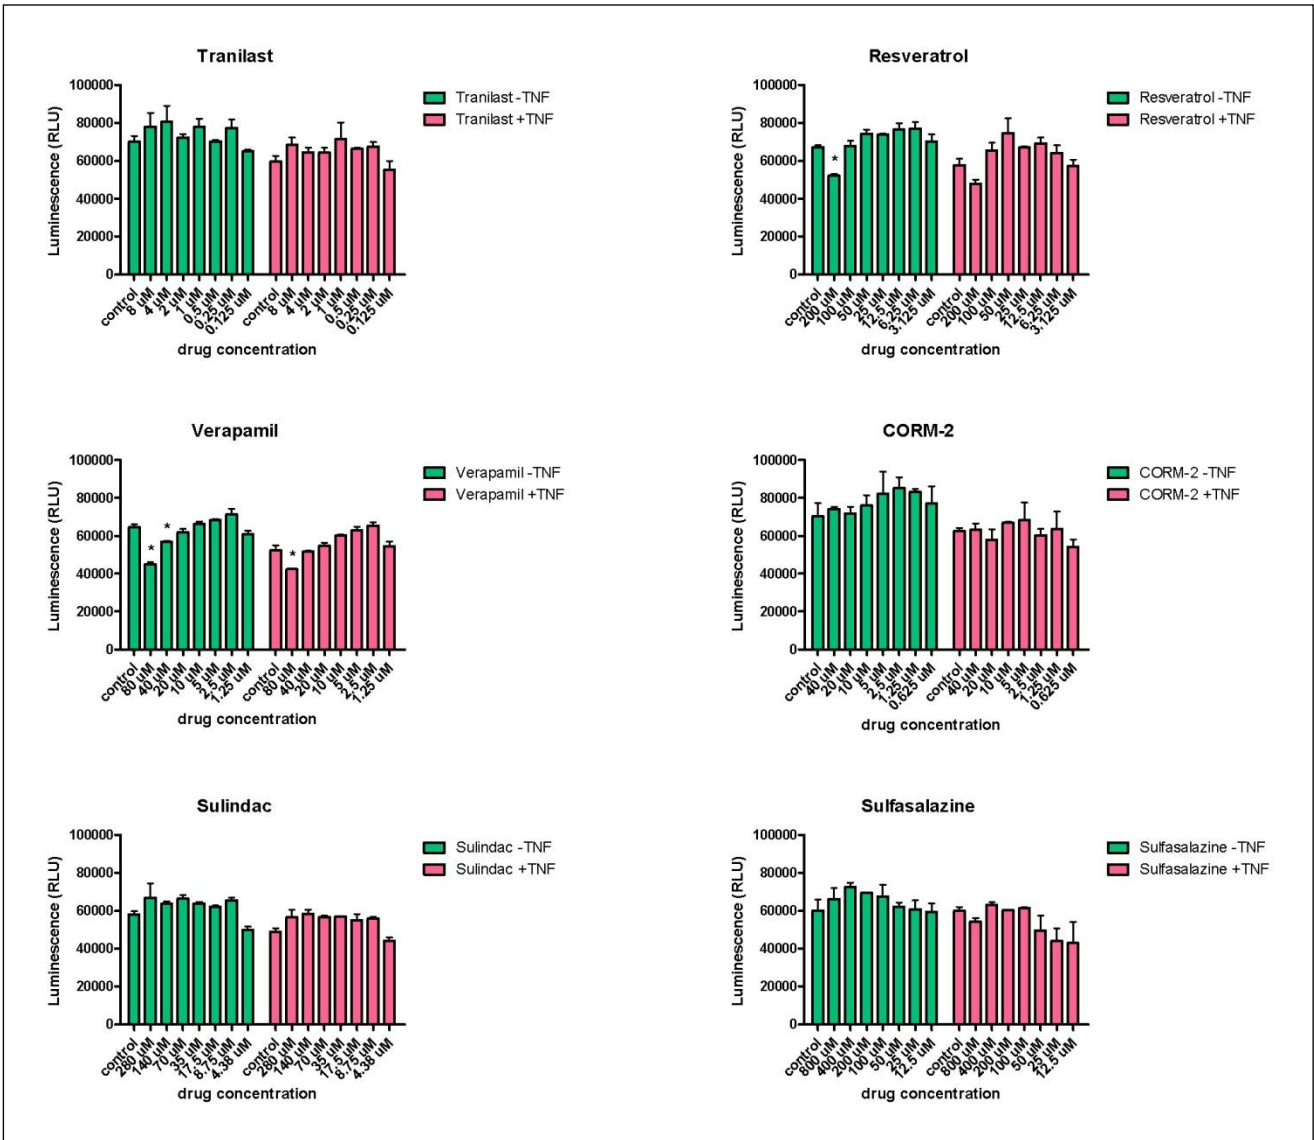

**Figure 21** – Effects of Tranilast, Resveratrol, Verapamil, CORM-2, Sulindac, and Sulfasalazine on the viability of SW982 cells +/- TNF alpha.

The effects of Tranilast, Resveratrol, Verapamil, CORM-2, Sulindac, and Sulfasalazine on the viability of synovial sarcoma cells (SW982) in the presence and absence of TNF-alpha stimulation are shown above. Shown is the mean +/- SD (n=3) at the indicated concentrations. (\*p<0.05, one-way ANOVA with Dunnet's post-test compared to no drug controls with and without TNF-alpha).

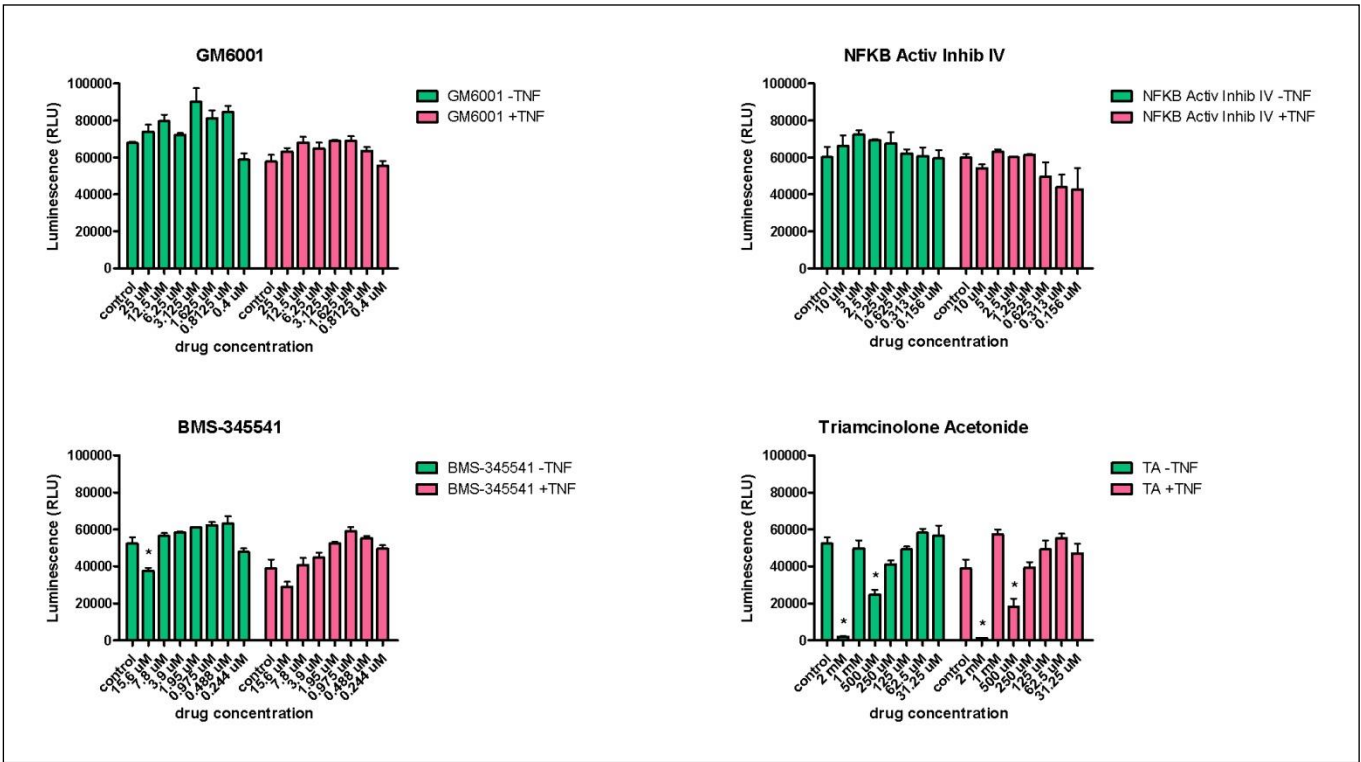

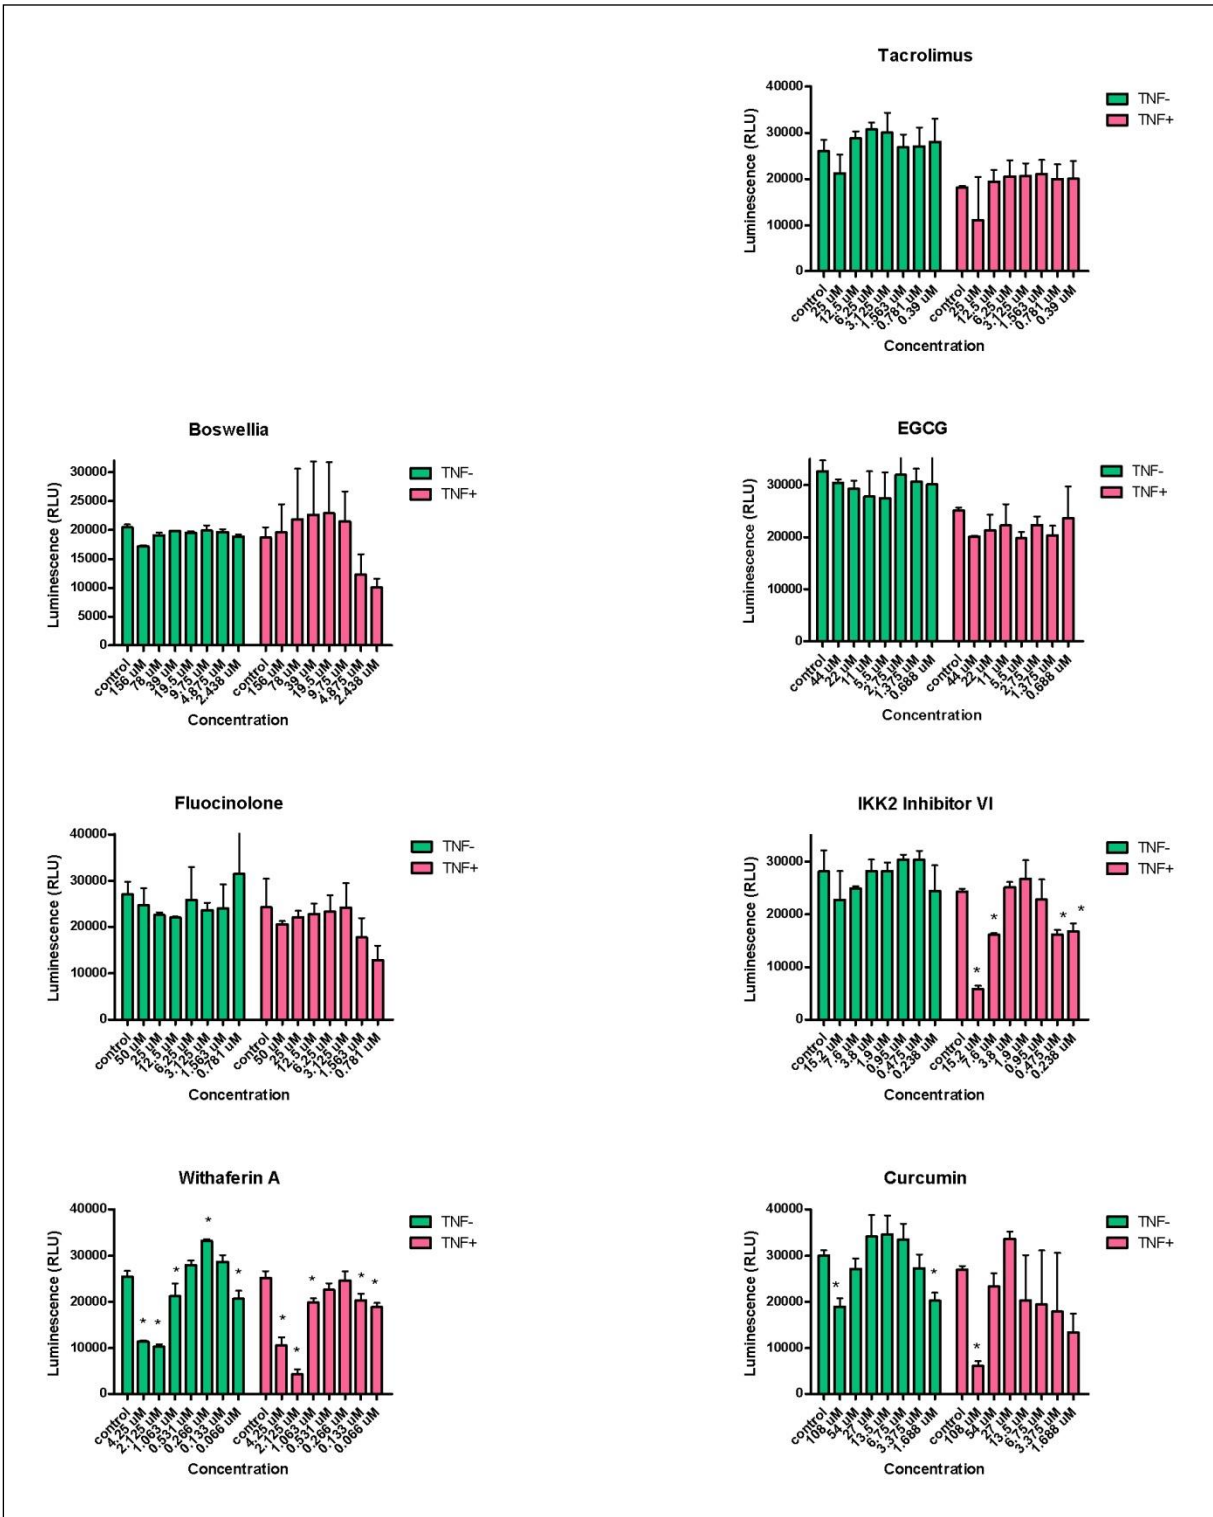

**Figure 23** – The effects of Tacrolimus, Boswellia, EGCG, Fluocinolone, IKK2 Inhibitor VI, Withaferin A and Curcumin on the viability of SW982 cells +/- TNF-alpha.

The effects of Tacrolimus, Boswellia, EGCG, Fluocinolone, IKK2 Inhibitor VI, Withaferin A and Curcumin on the viability of synovial sarcoma cells (SW982) in the presence and absence of TNF-alpha stimulation. Shown in **Figure 23** is the mean +/- SD (n=3) at the indicated concentrations. (\*p<0.05, one-way ANOVA with Dunnet's post-test compared to no drug controls with and without TNF-alpha).



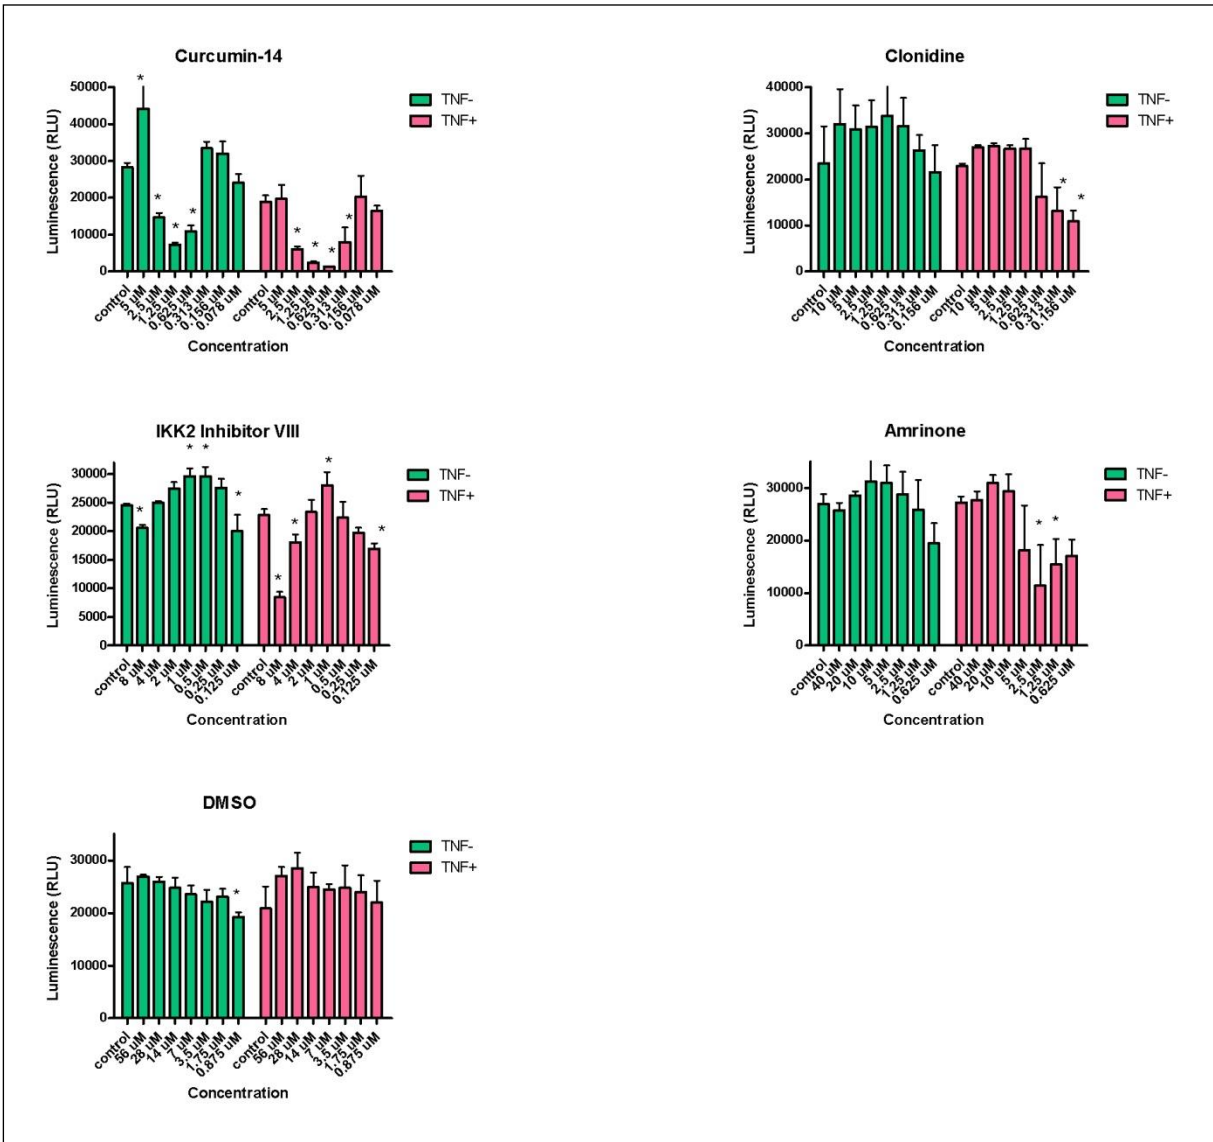

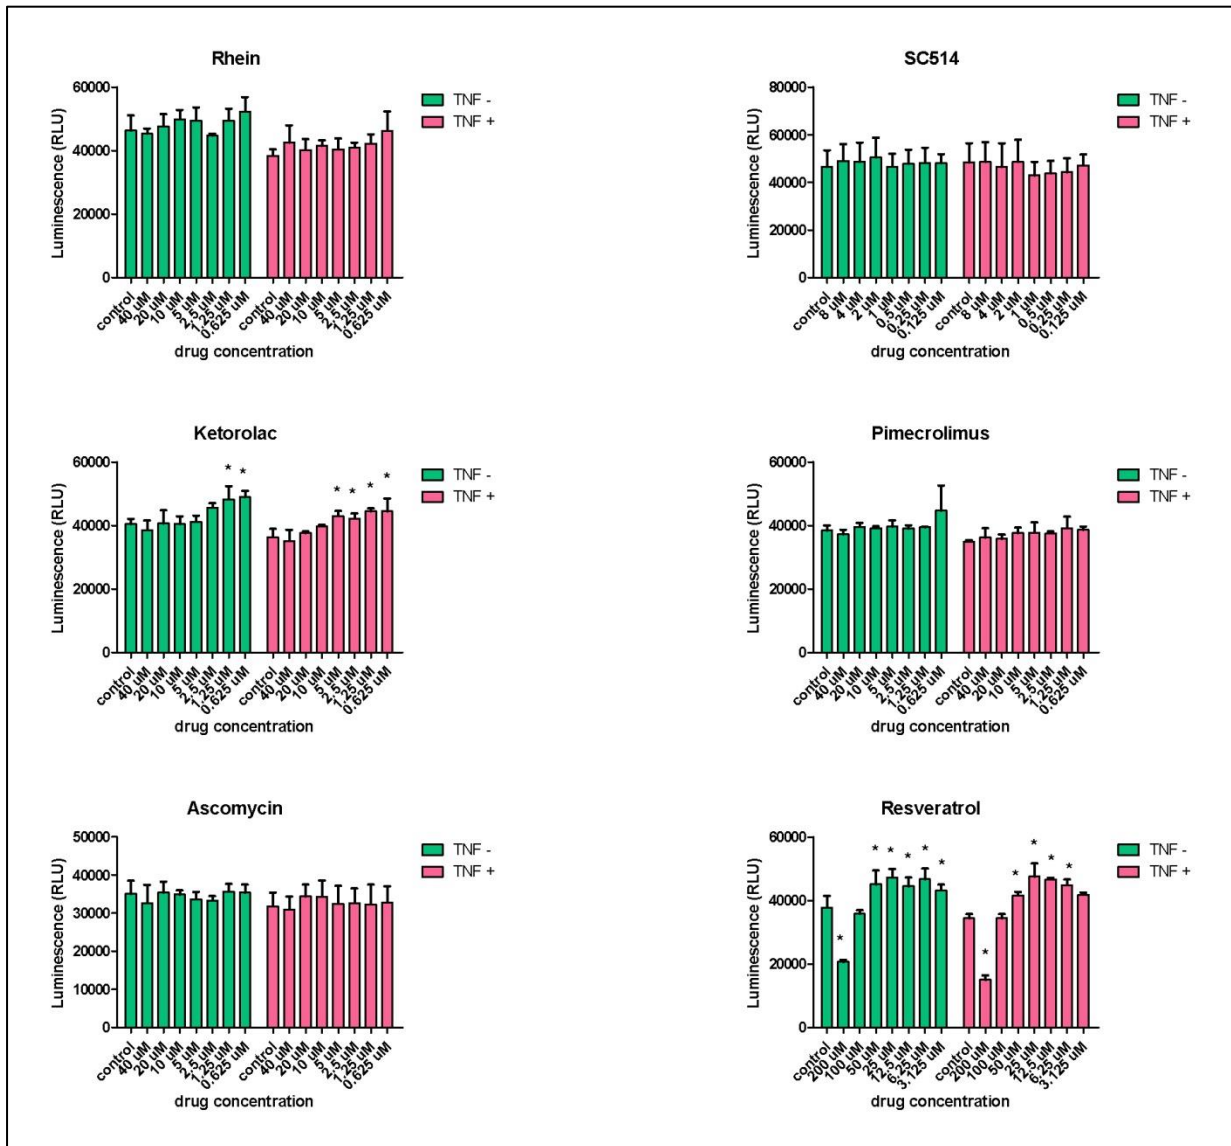

**Figure 25** – The effects of Rhein, SC514, Ketorolac, Pimecrolimus, Resveratrol and Ascomycin on the viability of SW982 cells +/- TNF- alpha. Note that Resveratrol stimulated cell growth resulting in significantly higher luminescence readings.

The effects of Rhein, SC514, Ketorolac, Pimecrolimus, Resveratrol and Ascomycin on the viability of synovial sarcoma cells (SW982) in the presence and absence of TNF-alpha stimulation are shown above in **Figure 25**. Shown is the mean +/- SD (n=3) at the indicated concentrations. (\*p<0.05, one-way ANOVA with Dunnet's post-test compared to no drug controls with and without TNF-alpha).

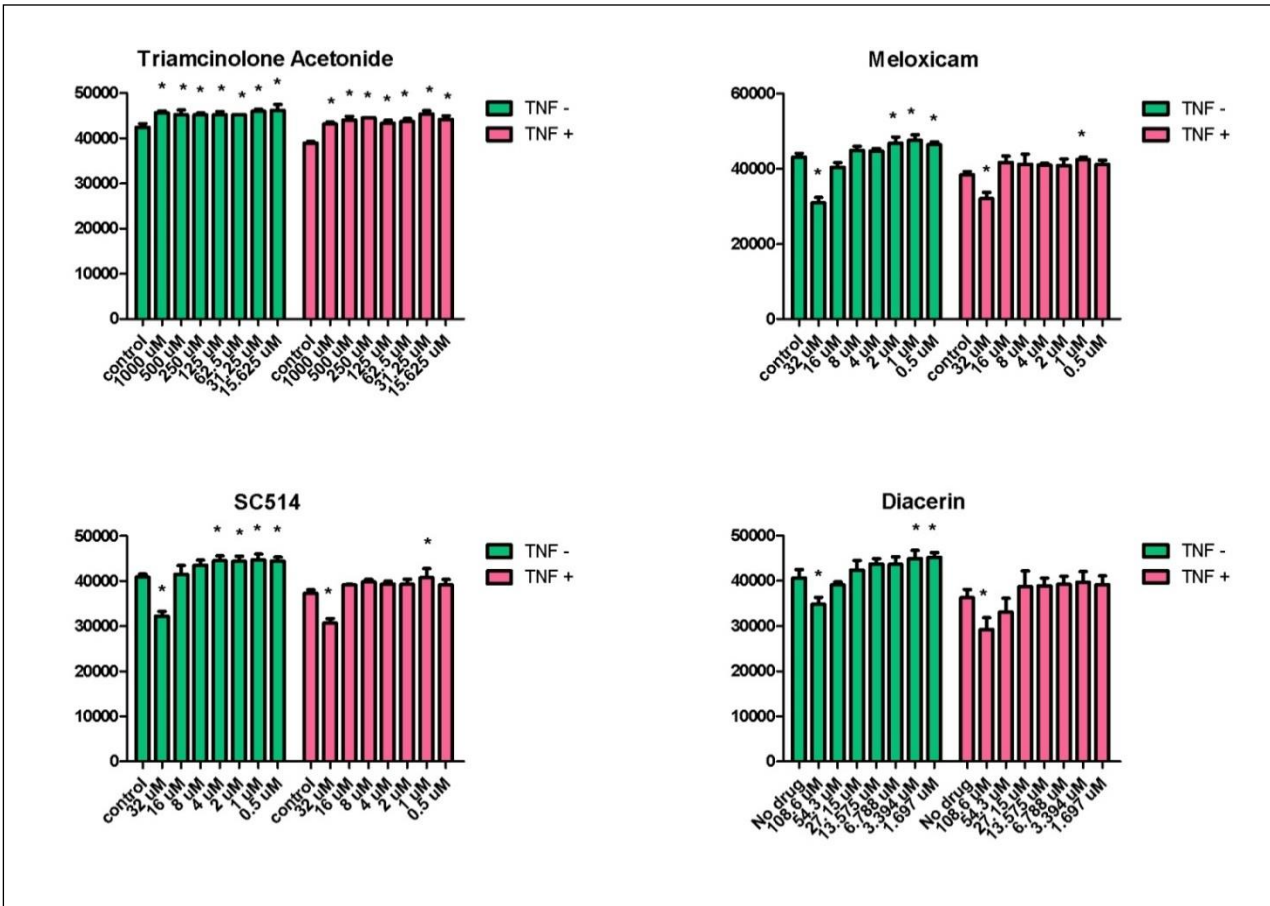

**Figure 26** – The effects of Triamcinolone Acetonide, Meloxicam, SC514, and Diacerin on the viability of SW982 cells +/- TNF alpha.

The effects of Triamcinolone Acetonide, Meloxicam, SC514, and Diacerin on the viability of synovial sarcoma cells (SW982) in the presence and absence of TNF-alpha stimulation are shown above in **Figure 26**. Shown is the mean +/- SD (n=3) at the indicated concentrations. (\*p<0.05, one-way ANOVA with Dunnet's post-test compared to no drug controls with and without TNF-alpha).

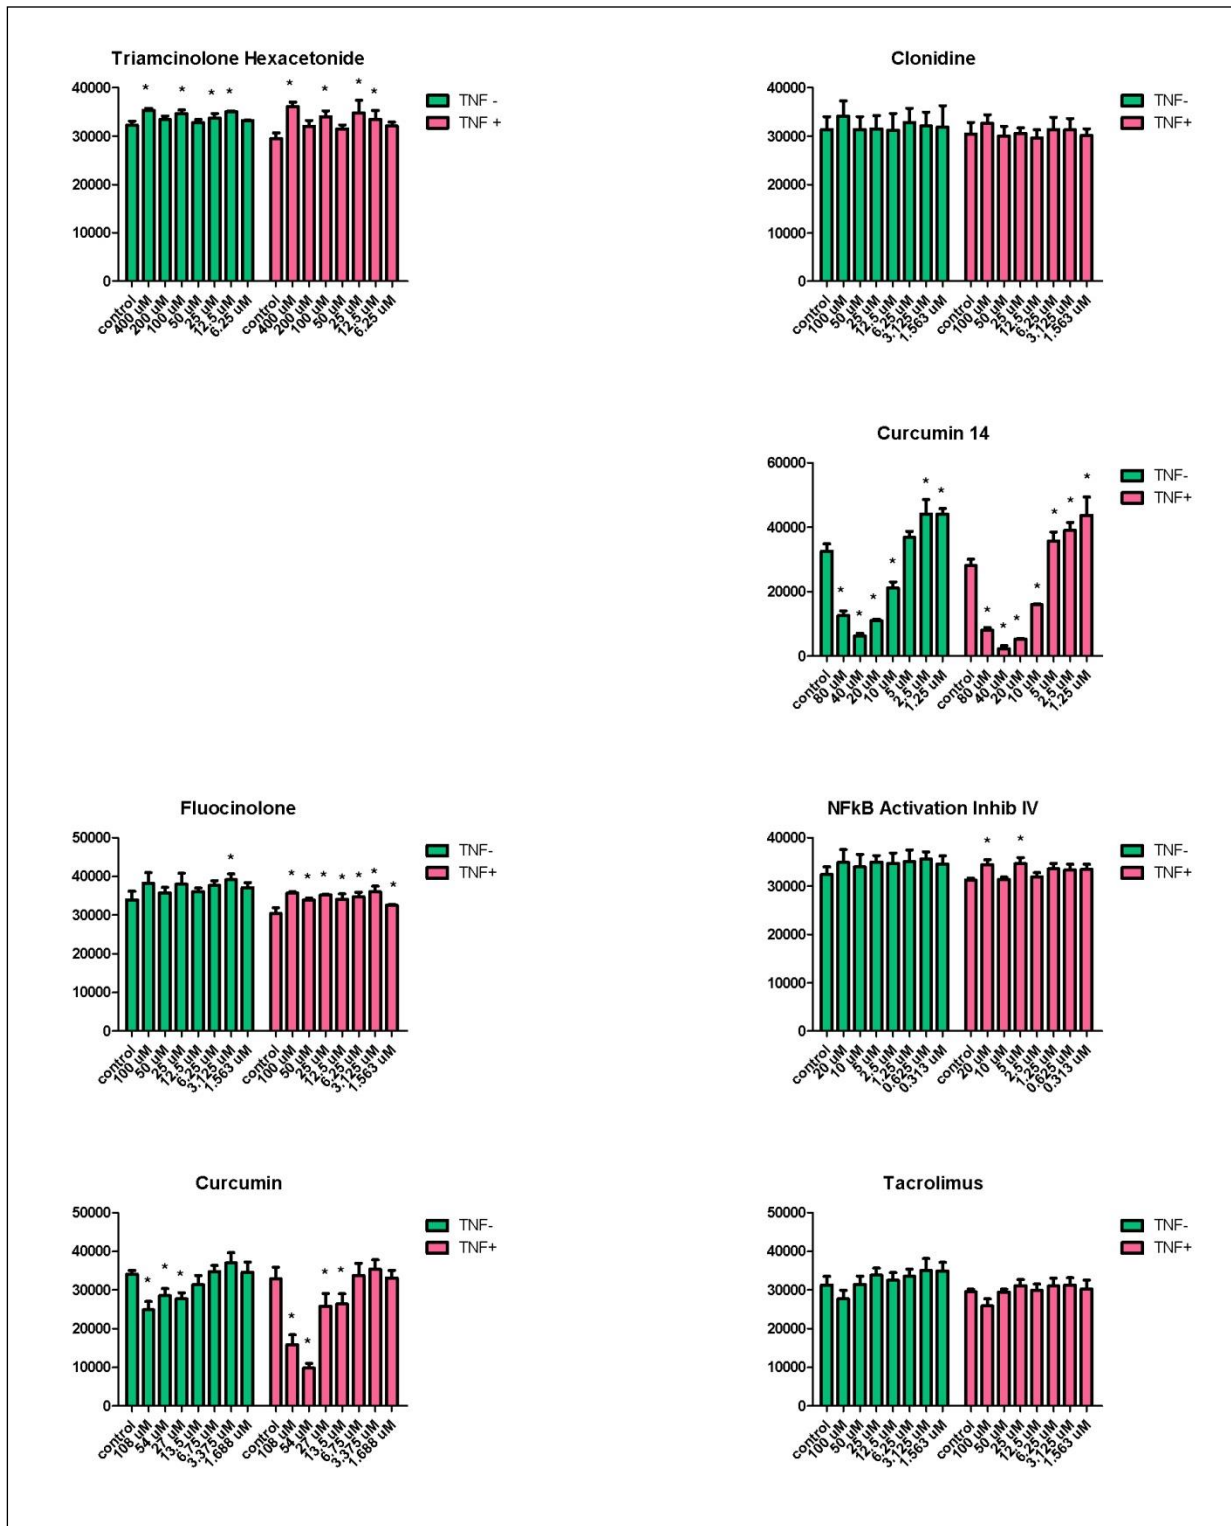

**Figure 27** – The effects of Traimcinolone Hexacetonide, Clonidine, Curcumin-14, Fluocinolone, NFkB Activation Inhibitor, Curcumin and Tacrolimus on the viability of SW982 +/- TNF-alpha.

The effects of Traimcinolone Hexacetonide, Clonidine, Curcumin-14, Fluocinolone, NFkB Activation Inhibitor, Curcumin and Tacrolimus on the viability of SW982 in the presence and absence of TNF-alpha stimulation are shown above in **Figure 27**. Shown is the mean +/- SD (n=3) at the indicated concentrations. (\*p<0.05, one-way ANOVA with Dunnet's post-test compared to no drug controls with and without TNF-alpha).

### In Vitro Toxicity Testing with Differentiated Human Chondrocytes.

Agents were also tested for toxicity using differentiated human chondrocytes as described in the manuscript.

**Figure 28.** Drug toxicity testing with chondrogenic pellets for agents tested in vivo.

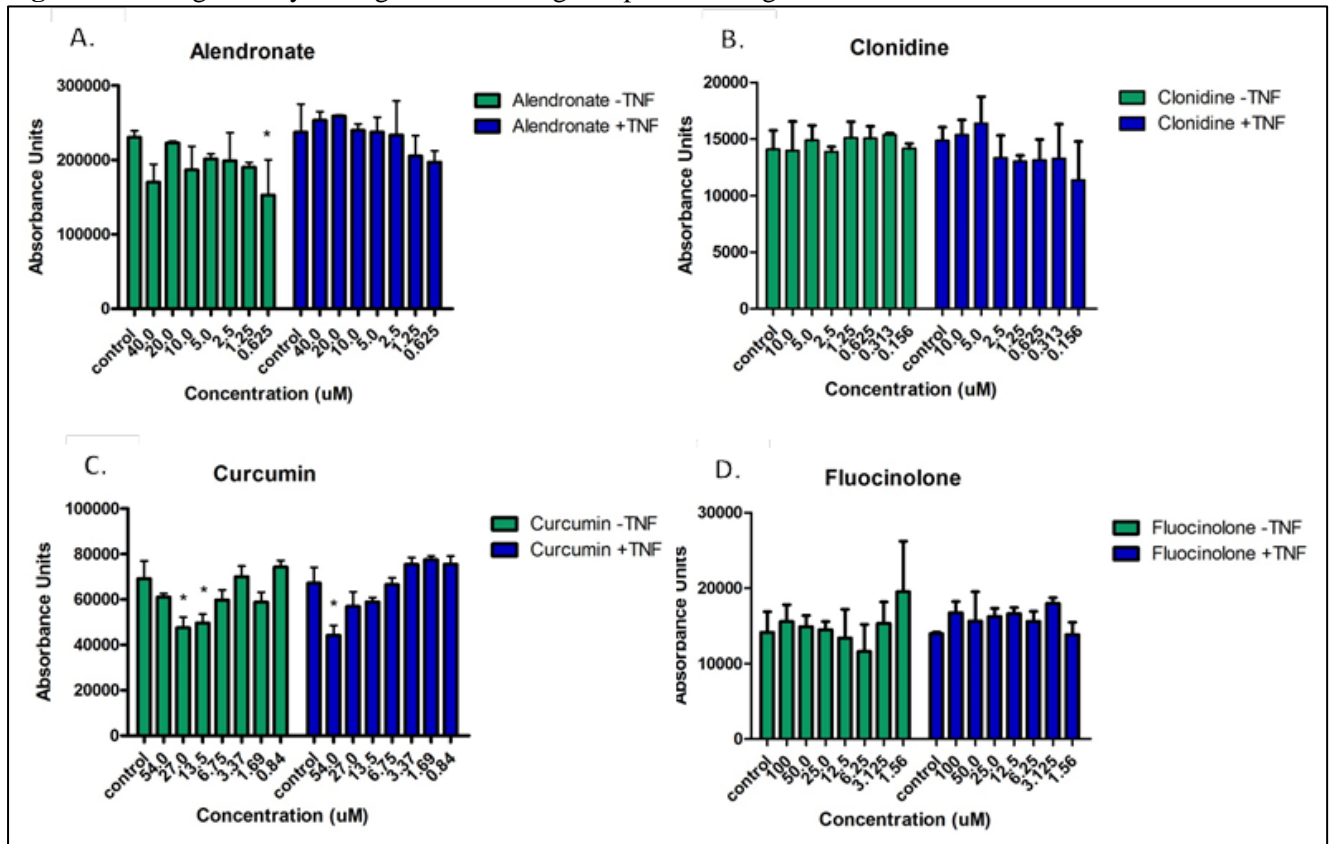

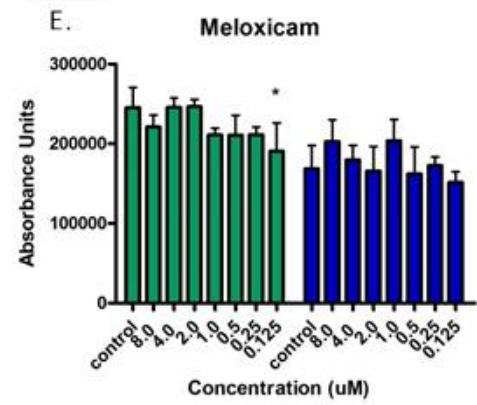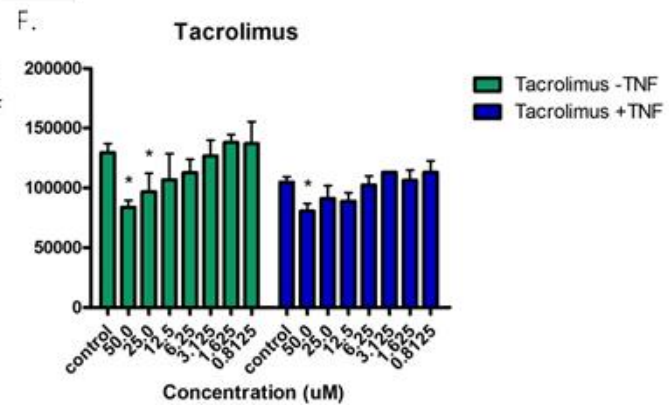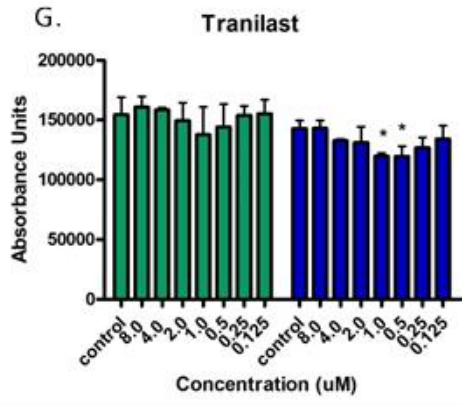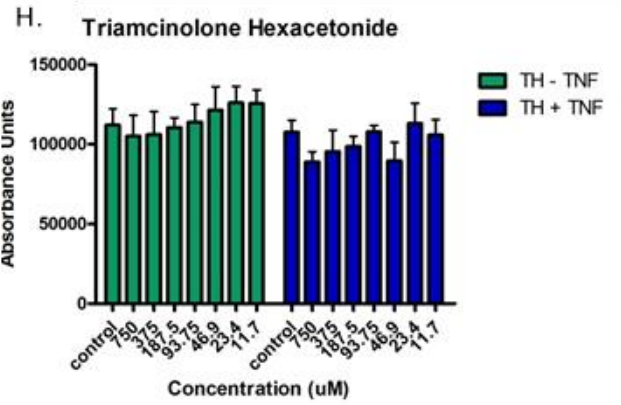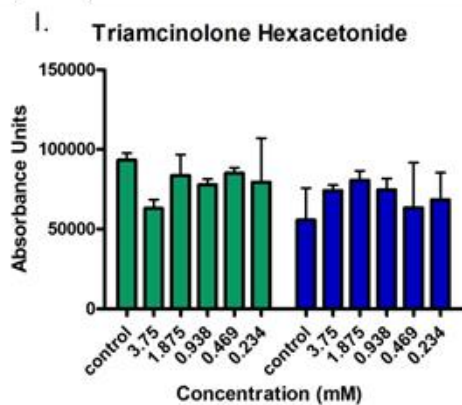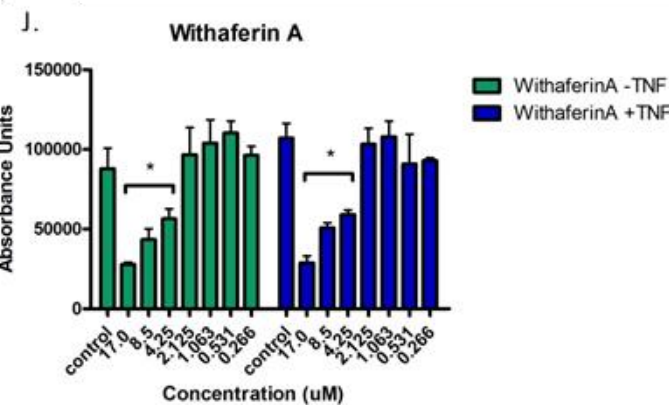

**Figure 29.** Drug toxicity testing with chondrogenic pellets for agents not tested in vivo.

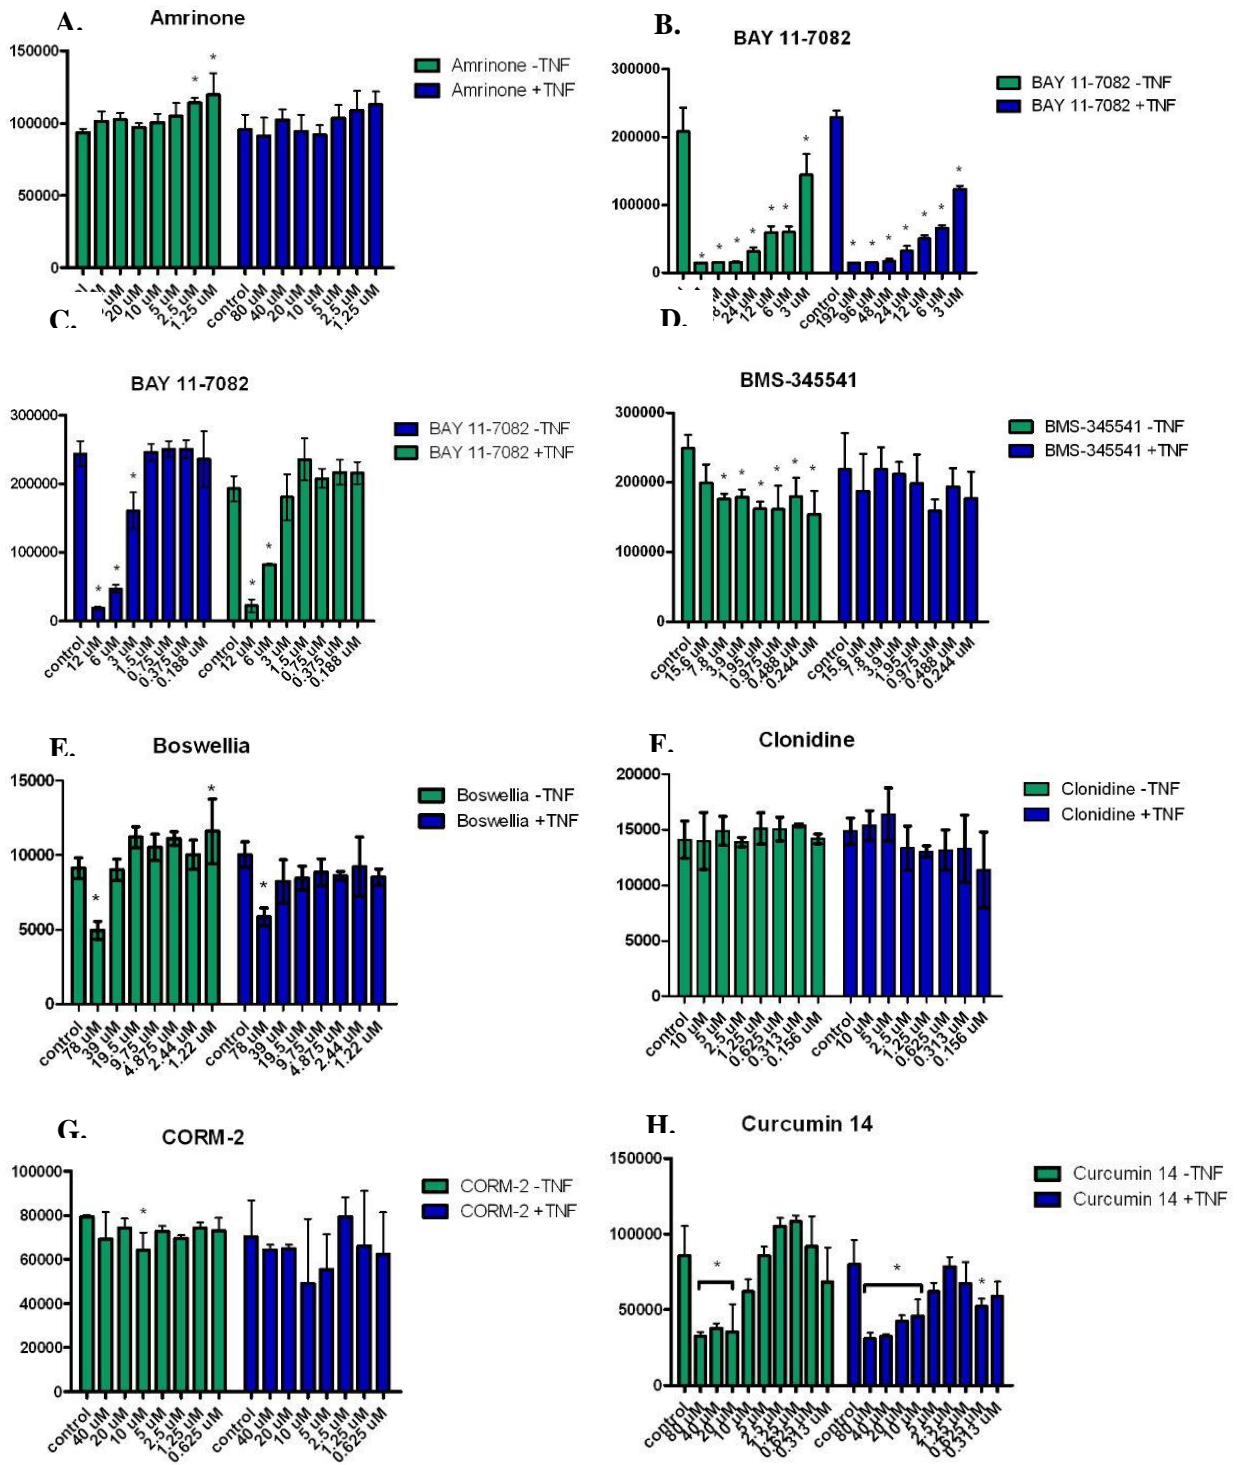

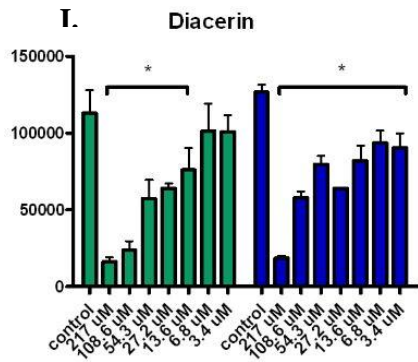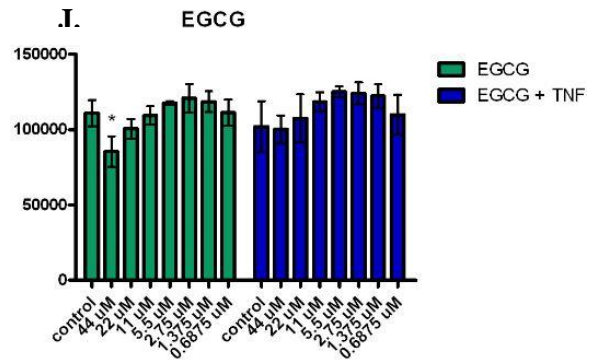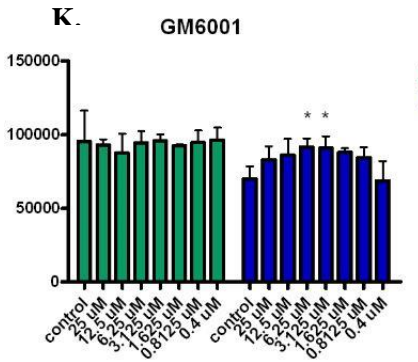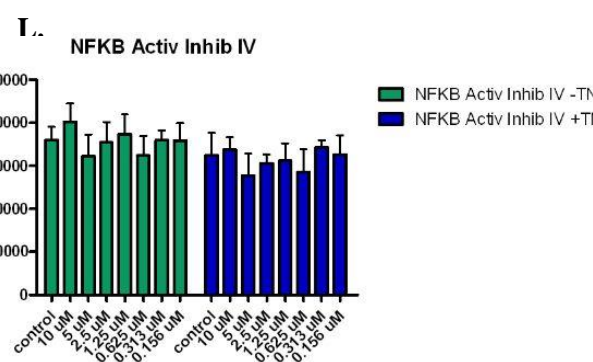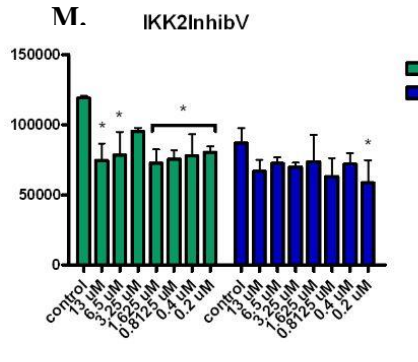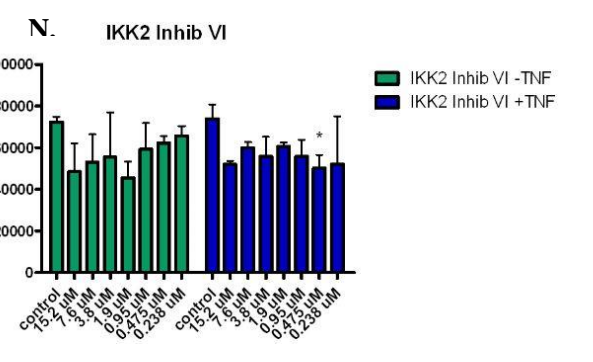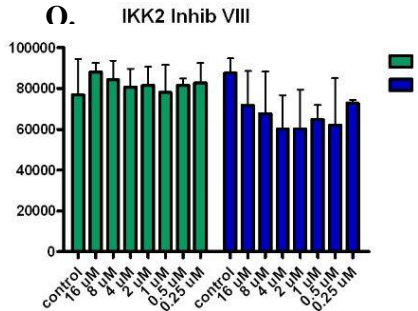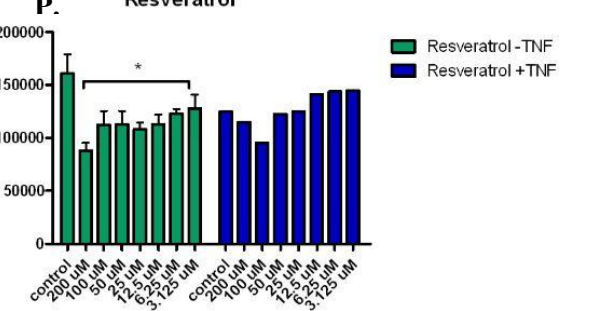



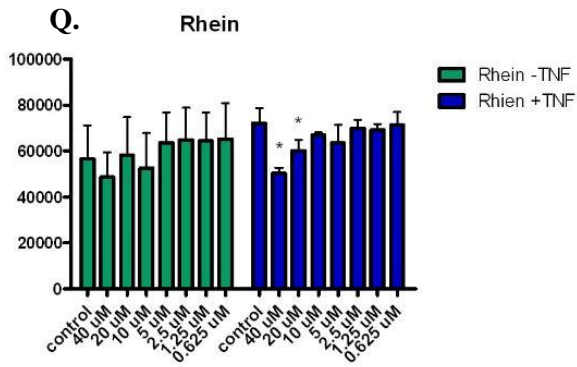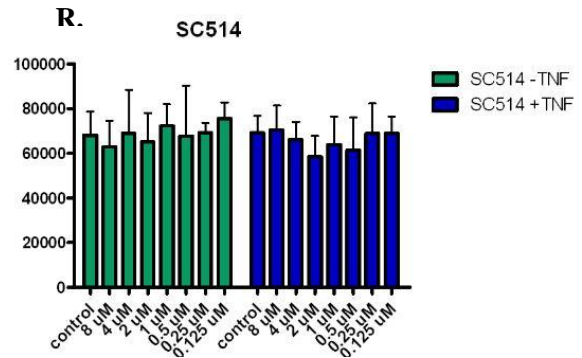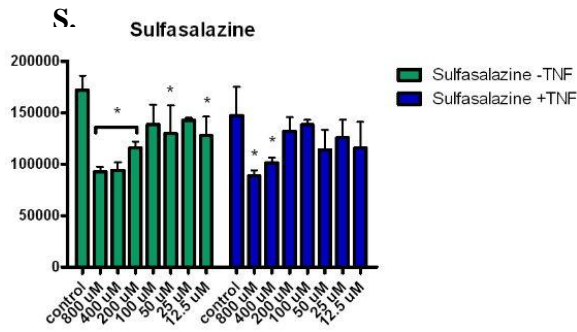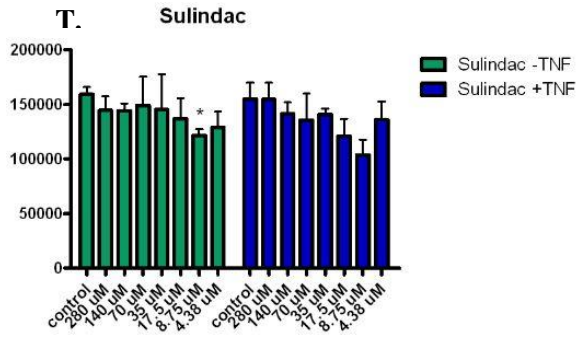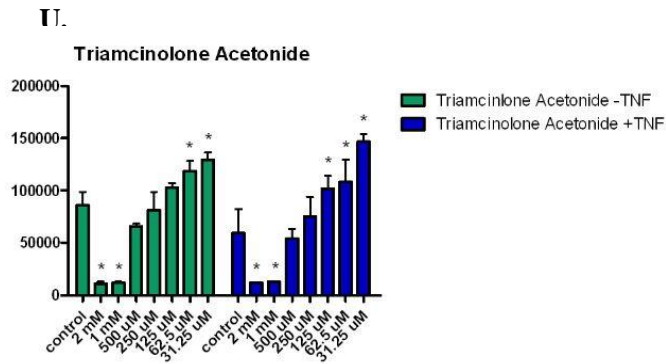

## In Vitro HeLa Cell Drug Toxicity Testing

Potential drug toxicity was measured using a CTG assay and HeLa cells (Promega). Drugs not tested in this assay were tested in either of the in vitro toxicity assays already presented (synovial or chondrocyte toxicity assays).

**Table 3-** Drug toxicity measured using a CTG assay and HeLa cells.

| <b>Agent</b>                 | <b>Range Tested (μM)</b> | <b>Toxic Concentrations (p&lt;0.05) (μM)</b>   | <b>Non-toxic concentrations (μM)</b> | <b>Effective against NF κβ (p&lt;0.05) (μM)</b> |
|------------------------------|--------------------------|------------------------------------------------|--------------------------------------|-------------------------------------------------|
| BAY-11-7082                  | 6 – 96                   | -                                              | 6 – 96                               | 12 – 96                                         |
| BMS-345541                   | 0.24 – 15.6              | -                                              | 0.24 – 15.6                          | 1-15.6                                          |
| Boswellic Acid               | 42.5 – 680               | 85 – 680                                       | 42.5                                 | Only at toxic concentrations                    |
| Curcumin                     | 2.1 – 54                 | 54                                             | 0 – 33.75                            | 33.75 – 54                                      |
| Diacerein                    | 6.9 – 110                | 27.5 -110 without TNF<br>50 -110 with TNF      | 0 – 13.75 (TNF)<br>0 – 22.75 (+TNF)  | 110                                             |
| IKK-2 Inhibitor IV           | 0.28 – 7.8               | 7.66                                           | 0 – 3.83                             | Not consistently effective (tested 3 times)     |
| IKK-2 Inhibitor V (IMD-0354) | 0.101 - 26               | 0.101 - 26 (without TNF<br>0.101 μM not toxic) | None                                 | Only at toxic concentrations                    |
| IKK-2 Inhibitor VI           | 0.028 – 3.83             | 1.9 – 3.83 More toxicity with TNF              | 0 – 0.9                              | 0.23 – 15.3                                     |
| Rhein                        | 2.5– 40                  | 40                                             | 2.5 – 20                             | Only at toxic concentrations                    |
| Sulindac                     | 8.75 – 70                | -                                              | No toxicity (+/- TNF)<br>8.75 – 70   | 70                                              |
| Sulfasalazine                | 50 – 800                 | -                                              | No toxicity (+/- TNF)<br>50 – 800    | 400 – 800                                       |
| Tacrolimus                   | 3.1 – 49.6               | -                                              | 0 – 49.6                             | 25 -49.6                                        |
| Withaferin A                 | 0.25 – 17                | -                                              | 0 -17                                | 2 – 17                                          |

## Toxicity and Efficacy: Comparison of Test Results

**Table 4.** Comparison of screening results for various drugs.

| Agent                      | Range Tested ( $\mu\text{M}$ ) | Non-toxic range ( $\mu\text{M}$ ) (Synovial) | Non-toxic range ( $\mu\text{M}$ ) (Chondrocyte) | Effective range against NFkB ( $\mu\text{M}$ ) | Effective range against MMP-13 ( $\mu\text{M}$ ) | Effective range against Osteoclasts ( $\mu\text{M}$ ) | Non-toxic & predicted range of efficacy ( $\mu\text{M}$ ) |
|----------------------------|--------------------------------|----------------------------------------------|-------------------------------------------------|------------------------------------------------|--------------------------------------------------|-------------------------------------------------------|-----------------------------------------------------------|
| Alendronate (bone control) | 0.625 - 40                     | 1.25 - 20 (40 toxic)                         | 0.625 - 40                                      | Not tested                                     | Not effective in range tested                    | 1.25 and 20                                           | 1.25 -20+<br><b>Bone control</b>                          |
| Amrinone                   | 0.625 - 80                     | 1.25 - 40                                    | 1.25 - 80                                       | None; tested to 50 $\mu\text{M}$               | 80                                               | Not effective in range tested                         | 80 + for MMP only; don't use                              |
| Ascomycin                  | 0.01 - 40                      | 0.625 -40                                    | 0.625 - 40                                      | 1.25 - 40                                      | Not effective in range tested                    | 0.01+ (need to test lower)                            | 1.25 - 40<br><b>NFkB; OCs</b>                             |
| BAY-11-7082                | 0.75 - 12                      | 3-6 (12+ toxic)                              | 0.18 - 1.5 (3+ toxic)                           | 12-96                                          | 0.75+                                            | 3+                                                    | None, don't use                                           |
| BMS-345541                 | 0.24 - 15.6                    | 0.24 - 7.8 (15.6 toxic)                      | 0.24-15.6                                       | 1 - 15.6                                       | 0.244+                                           | 0.244                                                 | 0.24 - 7.8                                                |
| Boswellic Acid             | 0.61 - 680                     | 2.4 - 156 (test higher)                      | 0.6 - 78 (test higher)                          | 680                                            | 39 +                                             | 9.75+                                                 | 40-680<br><b>NFkB; MMP-13; OCs</b>                        |
| Clonidine                  | 0.156 - 100                    | 1.56 - 100                                   | 0.156 - 100                                     | Not effective in the range tested              | Not effective in the range tested                | 10 and higher                                         | <b>Pain control only</b>                                  |
| CORM-2                     | 0.625 - 40                     | 2.5 - 40                                     | 0.625 - 40                                      | Not tested - not expected to inhibit           | 10 - 40                                          | 20-40                                                 | 20 - 40 (possibly higher)<br><b>MMP-13; OCs</b>           |

| Agent                        | Range Tested (µM) | Non-toxic range (µM) (Synovial)                         | Non-toxic range (µM) (Chondrocyte)     | Effective range against NFκB (µM) | Effective range against MMP-13 (µM) | Effective range against Osteoclasts (µM) | Non-toxic & predicted range of efficacy (uM)       |
|------------------------------|-------------------|---------------------------------------------------------|----------------------------------------|-----------------------------------|-------------------------------------|------------------------------------------|----------------------------------------------------|
| Curcumin                     | 0.84 - 108        | 1.7 - 54 (108 <sup>+</sup> toxic, but some variability) | 0.84 - 27 (54 <sup>+</sup> toxic)      | 13.5 and higher                   | 3.4 and higher                      | 6.75 <sup>+</sup>                        | 13.5 -54<br><b>NFκB; MMP-13; OCs</b>               |
| Curcumin 14                  | 1.25 - 80         | 0.313 - 5.0 (10 <sup>+</sup> toxic but variable)        | 0.3 - 10 uM (10 with minimal toxicity) | 2.5 and higher                    | 0.625 and higher                    | Not effective in range tested            | 2.5 - 10<br><b>NFκB; MMP-13</b>                    |
| Diacerein                    | 1.5 - 217         | 1.5 - 54.3 (108 <sup>+</sup> toxic)                     | All toxic (3.4 - 217 toxic)            | 110 uM (higher not tested)        | 6.8 - 217                           | 13.6 - 110                               | None; don' t use                                   |
| EGCG                         | 0.69 - 44         | 0.69 -44                                                | 0.69 -44                               | 5.5 - 88                          | 5.5 and higher                      | None?                                    | 5.5 -44 (possibly higher)<br><b>NFκB; MMP-13</b>   |
| Fluocinolone                 | 0.156 - 250       | 1.56 - 100                                              | 1.56 - 250                             | 3.1 and higher (test lower)       | 1.56 and higher (test lower)        | 9.77 nM and higher (test lower)          | 3.1 - 250 (test lower)<br><b>NFκB; MMP-13; OCs</b> |
| GM6001                       | 0.33 - 25         | 0.33 - 25                                               | 0.4 - 25                               | Not tested                        | 25                                  | Not effective                            | 25 <sup>+</sup> (test higher)                      |
| IKK-2 Inhibitor IV           | 0.28 - 7.8        | 0 - 20                                                  | Not tested                             | 1.8 -7.7                          | Not tested                          | Not tested                               | Due to limited availability dropped                |
| IKK-2 Inhibitor V (IMD-0354) | 0.025 - 26        | 0.1 - 0.2 (test lower)                                  | 0.4 - 13 (test higher)                 | 1.625 - 26                        | 0.6125 and higher                   | 0.813 and higher                         | 1.625-26<br><b>NFκB; MMP-13; OCs</b>               |

| Agent              | Range Tested (µM) | Non-toxic range (µM) (Synovial) | Non-toxic range (µM) (Chondrocyte) | Effective range against NFκB (µM) | Effective range against MMP-13 (µM) | Effective range against Osteoclasts (µM)   | Non-toxic & predicted range of efficacy (uM) |
|--------------------|-------------------|---------------------------------|------------------------------------|-----------------------------------|-------------------------------------|--------------------------------------------|----------------------------------------------|
| IKK-2 Inhibitor VI | 0.028 -15.2       | 0.028 - 0.25 not toxic          | 0.23 - 15.6                        | 0.95 and higher                   | 0.24 and higher                     | 0.5 and higher (test lower)                | 0.95-4.0 <b>NFκB; MMP-13; OCs</b>            |
| IKK inhibitor VIII | 0.25 - 16         | 0.3 - 2.0 (4.0+ toxic)          | 0.25 - 16                          | Not tested.                       | 4 - 16                              | 2 and higher                               | 2-4 (risk toxicity to synovium)              |
| Keterolac          | 0.625 - 80        | 0.625 - 40                      | 3.17 - 200                         | 2.5 only; not 5-40                | 12.5 and higher                     | Not effective in range tested              | 12.5 and higher <b>MMP-13 only</b>           |
| Meloxicam          | 0.125 - 32        | 0.25 - 16 (32 toxic)            | 0.125 - 8 (need to test higher)    | 16 and higher                     | Not effective in range tested       | Not effective in range tested              | 16-32 uM                                     |
| Pimicrolimus       | 0.625 - 40        | 0.625 - 40                      | 0.625 - 40                         | 2.5 - 20 (not tested lower)       | Not effective in range tested       | 0.01 - 100                                 | 2.5 - 40 possibly lower <b>NFκB; OCs</b>     |
| Resveratrol        | 3.125 - 200       | 3.125 - 100 (200+ toxic)        | 3.125 - 200                        | Not effective in range tested     | 3.125 and higher                    | 6.25 and higher                            | 6.25 - 200 <b>MMP-13; OCs</b>                |
| Rhein              | 0.625- 40         | 0.625 -40                       | 0.625-40                           | 40                                | 40                                  | Not effective in range tested              | 40 (test higher) <b>NFκB; MMP</b>            |
| SC514              | 0.125 - 32        | 0.125 - 16 (32 toxic)           | 0.125 - 8 (test higher)            | None (tested only to 8 uM)        | Not effective (only tested to 8 uM) | Not effective tested (only tested to 4 uM) | Don't use                                    |
| Sulindac           | 4.35 - 280        | 4.4 - 280                       | 4.35 - 280                         | 8.8 - 140 (not tested at higher)  | 8.75 and higher                     | 100                                        | 8.8 - 280 <b>NFκB; MMP-13; OCs</b>           |

| Agent                    | Range Tested ( $\mu\text{M}$ ) | Non-toxic range ( $\mu\text{M}$ ) (Synovial) | Non-toxic range ( $\mu\text{M}$ ) (Chondrocyte) | Effective range against NF $\kappa$ B ( $\mu\text{M}$ ) | Effective range against MMP-13 ( $\mu\text{M}$ ) | Effective range against Osteoclasts ( $\mu\text{M}$ ) | Non-toxic & predicted range of efficacy ( $\mu\text{M}$ )                          |
|--------------------------|--------------------------------|----------------------------------------------|-------------------------------------------------|---------------------------------------------------------|--------------------------------------------------|-------------------------------------------------------|------------------------------------------------------------------------------------|
| Sulfasalazine            | 12.5 - 1600                    | 12.5 - 400 (400+ toxic)                      | 12.5 - 800                                      | 50 - 800                                                | 50 and higher                                    | 150 - 1600                                            | 50 -400 NF $\kappa$ B; MMP-13; OCs                                                 |
| Tacrolimus               | 0.8 - 100                      | 1.5 - 100                                    | 0.8 - 50                                        | 25 and higher                                           | 50                                               | 0.011 and higher                                      | 25 -50; possibly higher NF $\kappa$ B; MMP-13; OCs                                 |
| Tranilast                | 0.125 - 8                      | 0.125 - 8                                    | 0.125 -8 (some minimal toxicity at mid values)  | None; tested only to 8 $\mu\text{M}$                    | 1 and higher                                     | 0.5 (but not 0.25)                                    | 1 - 8 MMP-13; OCs                                                                  |
| Triamcinolone acetone    | 0.7 - 1000                     | 0.7 - 250 (500+ toxic)                       | 32.25 - 500                                     | None                                                    | 31.25                                            | 1                                                     | 31.25 -500 MMP-13; OCs                                                             |
| Triamcinolone hexacetone | 3.125 - 1000                   | 3.125 - 400                                  | 11.7 $\mu\text{M}$ - 3.75 mM                    | 62.5+                                                   | 0.06 and higher                                  | 9.5 and higher                                        | 62.5 $\mu\text{M}$ - 3.75 mM NF $\kappa$ B; MMP-13; OCs                            |
| Verapamil                | 1.25 - 80                      | 1.25 - 40 (80+ toxic)                        | 1.25 -40 (80 barely toxic)                      | Only 20                                                 | 20 - 80, but significant variability             | Not effective concentration (to 40)                   | 20 - 40 NF $\kappa$ B and MMP-13                                                   |
| Withaferin A             | 0.25 - 17                      | Toxic (or pro-apoptotic) down to 0.067       | 0.27 - 2.1                                      | 0.5- 17                                                 | 0.25 and higher                                  | 0.5 and higher                                        | synovial toxicity but effective for all targets 0.27 - 2.1 (nontoxic to cartilage) |

## In Vivo Testing of Osteoarthritic Animals

### MIA Model Functional Assessment (see Appendix for individual animal data)

#### MIA Trial 1: Weight Bearing (WB)

Saline, morphine, clonidine, and fluocinolone were tested in the MIA model as shown below.

##### 1) Effect of Saline alone

Intra-articular injection of MIA resulted in the development of significant and prolonged osteoarthritis(OA)-related pain as demonstrated by decreases in pre-treatment hind limb weight bearing in vehicle-treated animals compared to pre-MIA injection on all days tested. Administration of vehicle alone had no effect on WB score at any time point on any testing day when post-treatment WB score of vehicle-treated animals were compared to the corresponding pre-treatment WB score demonstrating the stability of the vehicle group (**Figure 30**). Shown is the mean  $\pm$  SEM (n = 10) WB score for the experimental group indicated.

**Figure 30** – Effect of vehicle on weight bearing on Days 7, 14, 21, and 28

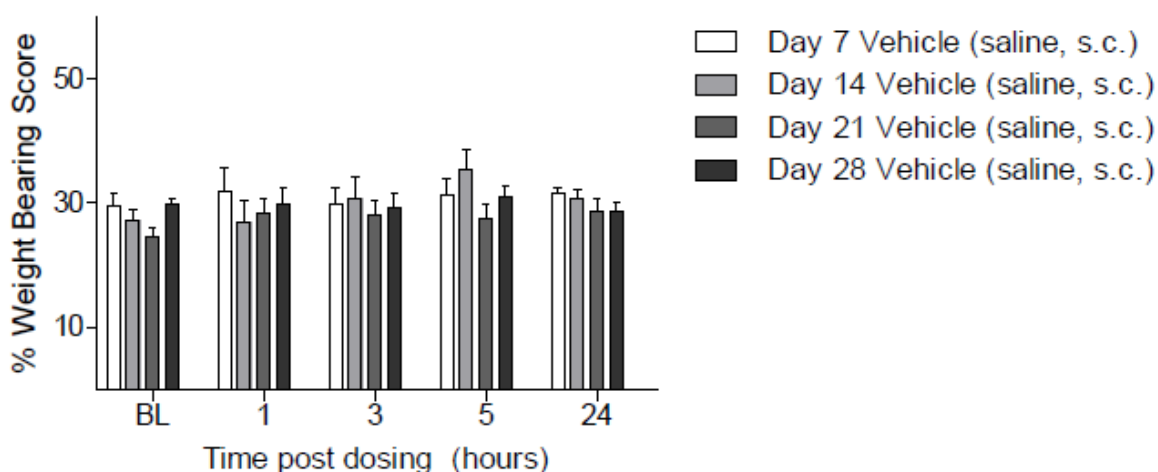

##### 2) Effect of Morphine

Treatment with morphine (6 mg/kg, s.c.) significantly increased the WB score 1, 3, and 5 hours after administration on Day 7 (**Figure 31**), 1 hour after administration on Day 14 (**Figure 32**), and 1 and 3 hours after administration on Days 21 and 28 (**Figures 33 & 34**, respectively) compared to the vehicle-treated group on the respective testing days. Administration of morphine (6 mg/kg, 5 ml/kg, s.c.) on Days 7, 14, 21, and 28 had no effect on pre-dosing WB score on any day tested compared to Day 7 pre-treatment measurements, however there was a significant difference in WB score on Day 21 when compared to vehicle-treated rats not shown. Below are the mean  $\pm$  SEM (n = 10) WB score for the experimental groups indicated (\*/\*\*/\*\*\*: p < 0.05/0.01/0.001, unpaired t-test, versus vehicle).

**Figure 31** – Effect of morphine (s.c.) weight bearing on Day 7

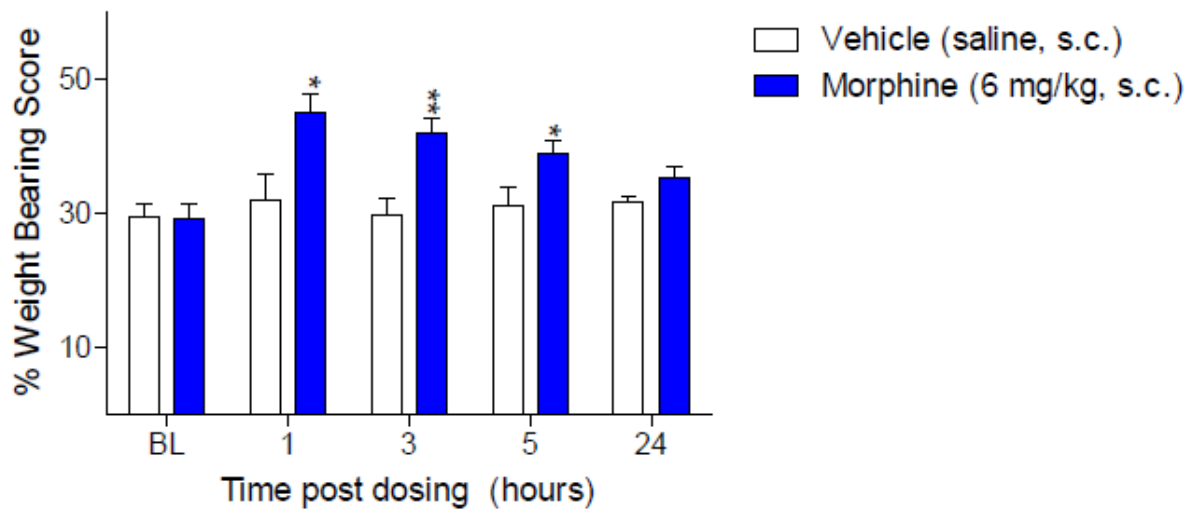

**Figure 32** - Effect of morphine (s.c.) on weight bearing on Day 14

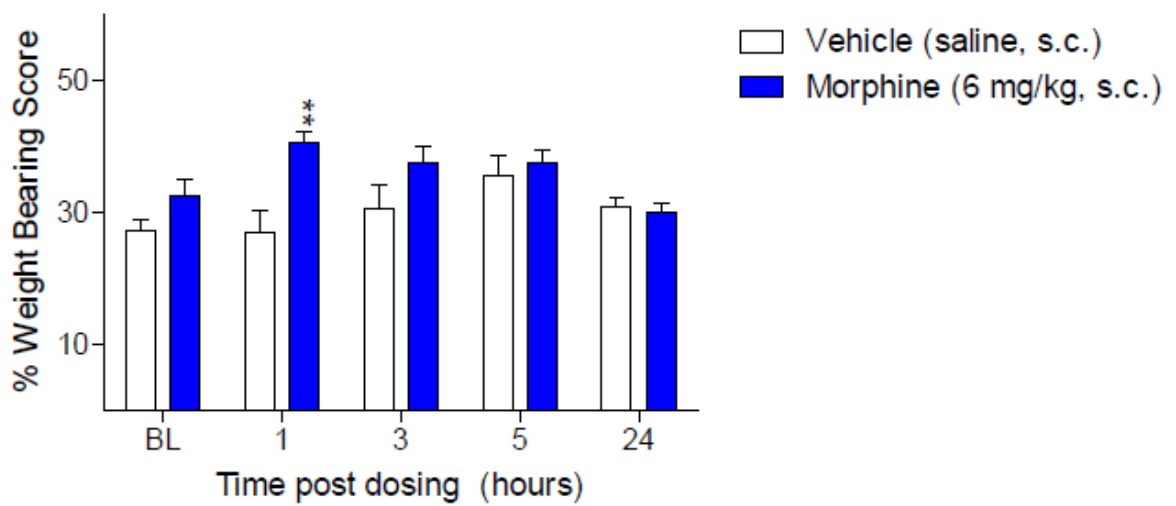



**Figure 33** - Effect of morphine (s.c.) on weight bearing on Day 21

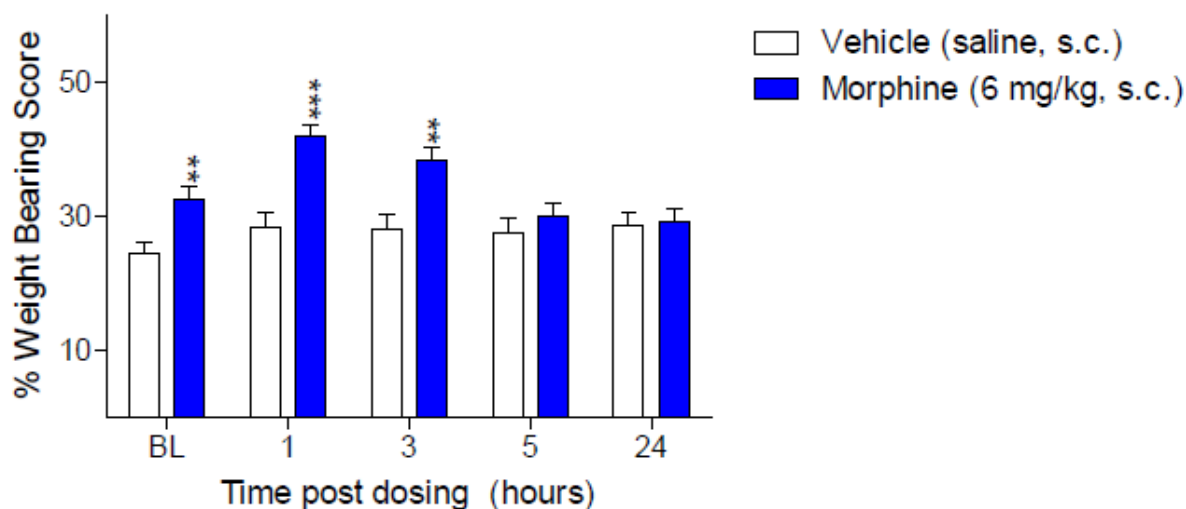

**Figure 34** - Effect of morphine (s.c.) on weight bearing on Day 28

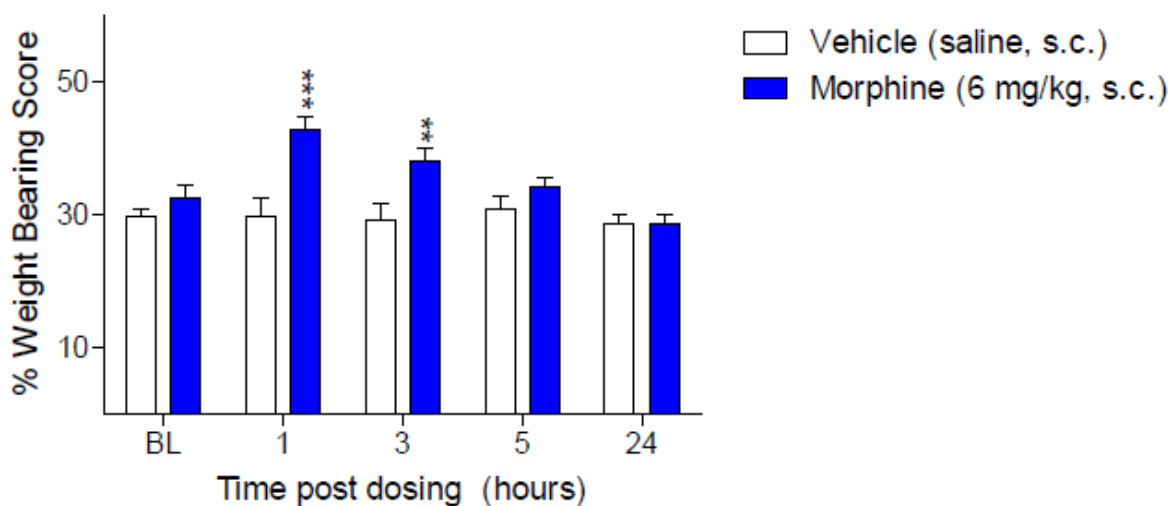

### 3) Effect of Clonidine

Daily administration (starting on Day 7) of clonidine (100 g/kg, 5 ml/kg, s.c.) had no effect on pre-treatment WB score on any day tested compared to Day 7 pre-treatment measurements or vehicle-treated rats (not shown). Clonidine treatment (100 g/kg, s.c.) increased the WB score 1, 5, and 24 hours after administration on Day 7 (**Figure 35**), 1 hour after administration on Days 14 and 21 (**Figures 36 & 37**, respectively), and 1 and 3 hours after administration on Day 28 (**Figure 38**) compared to the vehicle-treated group WB score on the respective testing days. Shown is the mean  $\pm$  SEM (n = 10) WB score for the experimental groups indicated (\*/\*\*/\*\*\*: p < 0.05/0.01/0.001, unpaired t-test, versus vehicle).

**Figure 35** - Effect of clonidine (s.c.) on weight bearing on Day 7

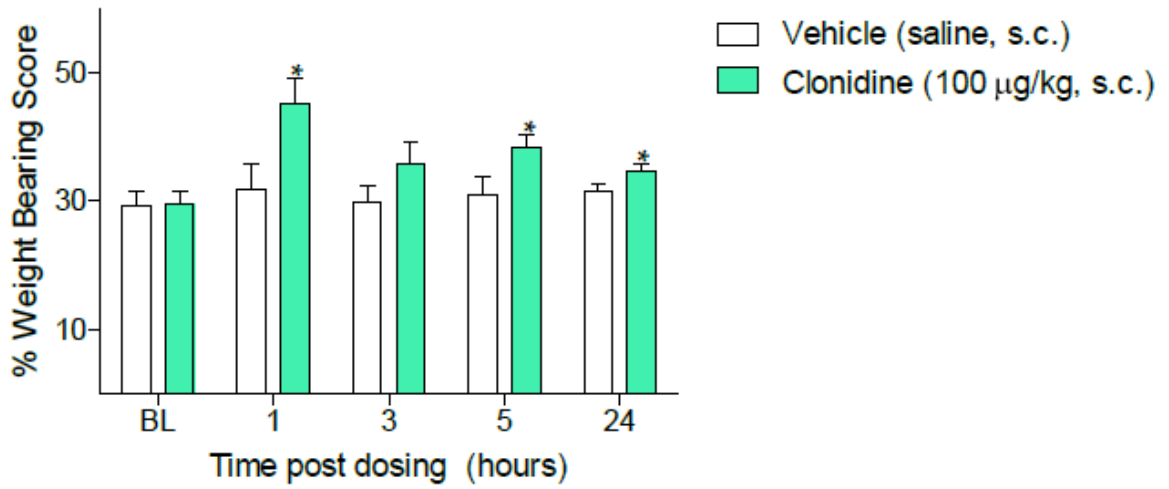

**Figure 36** - Effect of clonidine (s.c.) on weight bearing on Day 14

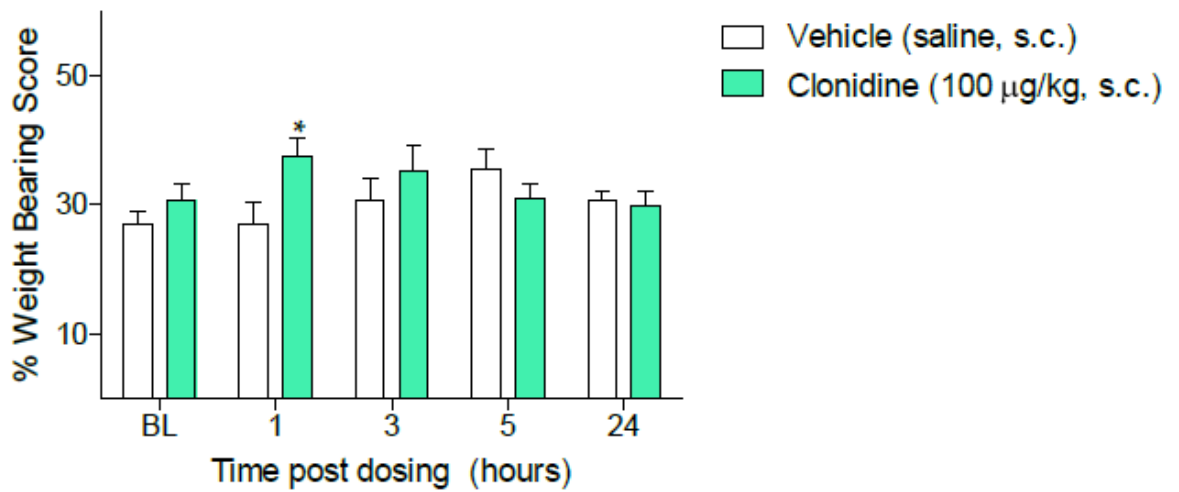

**Figure 37-** Effect of clonidine (s.c.) on weight bearing on Day 21

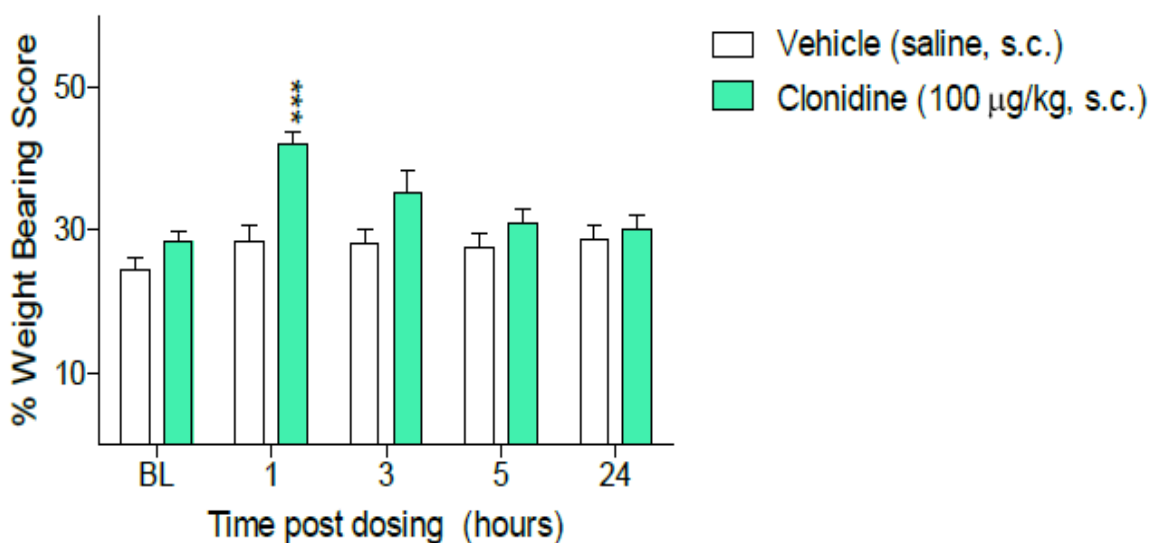

**Figure 38 -** Effect of clonidine (s.c.) on weight bearing on Day 28

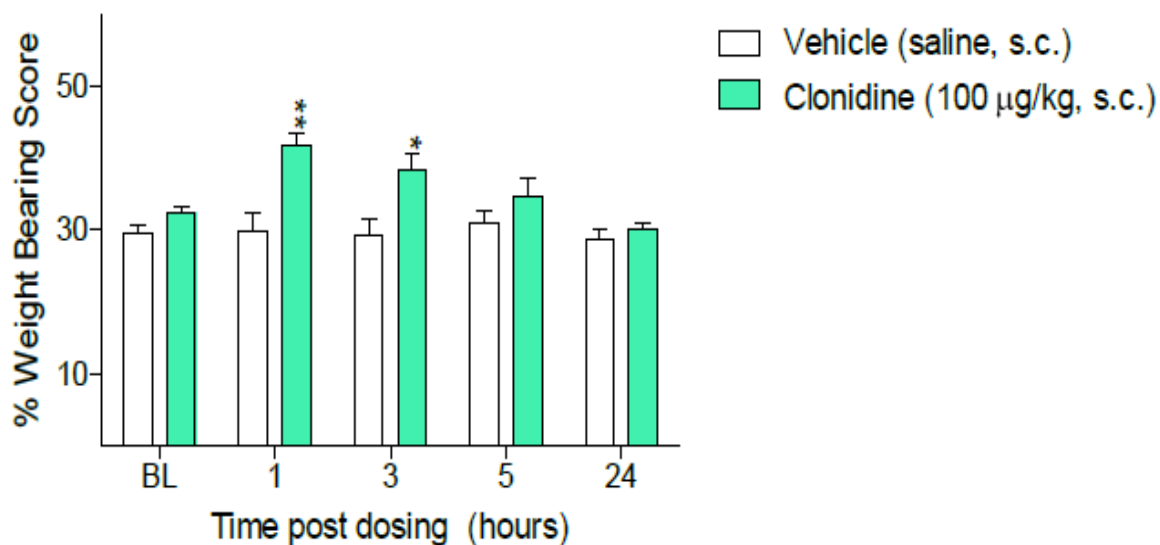

#### 4) Effect of Fluocinolone

A significant difference in WB score prior to daily dosing was observed on Day 21 compared to vehicle-treated rats (**Figure 39**) following daily administration (starting on Day 7) of fluocinolone (2 g/kg, 5 ml/kg, s.c.). This was similar to that observed with morphine. Fluocinolone treatment also significantly increased WB score 1 hour after administration on Day 21 (**Figure 40**) but had no effect on WB score at any time point tested on Days 7, 14, or 28 compared to the vehicle-treated group WB score on the respective testing days. (\*:  $p < 0.05$ , unpaired t-test, versus vehicle).

**Figure 39** –Pre-dose effect of daily fluocinolone administration (s.c.) on weight bearing

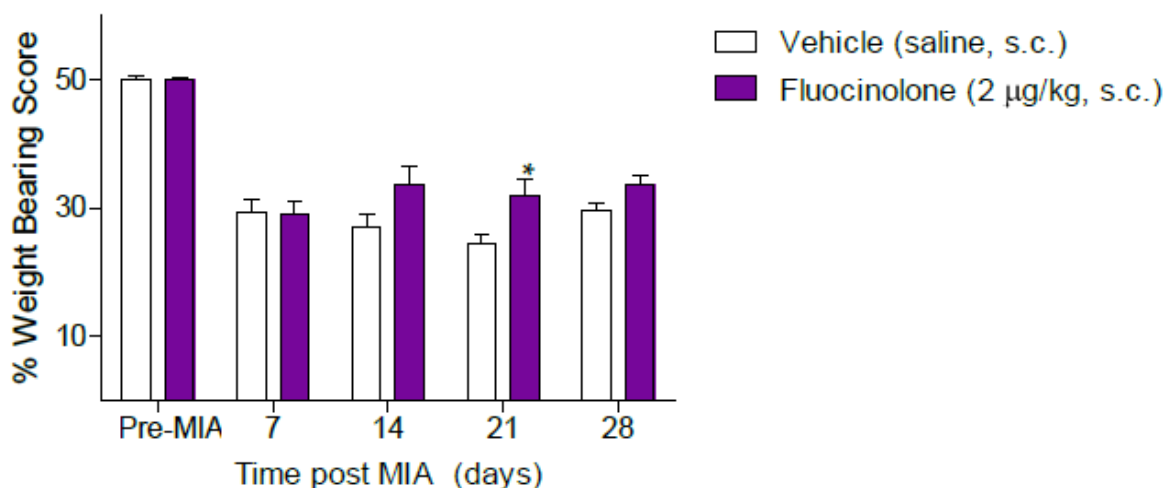

**Figure 40** - Effect of fluocinolone (s.c.) on weight bearing on Day 21

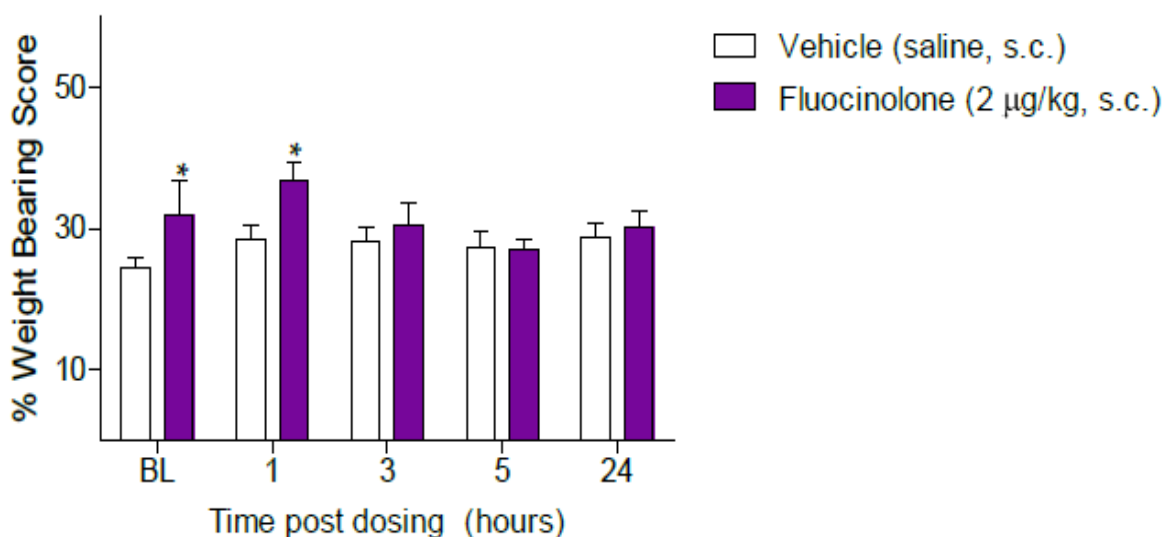

### MIA Trial 2: Digital Randall-Selitto (dRS) Test

Because the ability to discern differences using weight bearing was limited in the MIA model, the digital Randall-Selitto test (dRS) was verified for efficacy (data not shown). A number of drugs were tested including Clonidine, Tacrolimus, Curcumin, and Fluocinolone. Shown is the mean  $\pm$  SEM (n = 10) joint compression thresholds for the experimental groups indicated (+: p < 0.05, paired t-test versus vehicle; \*/\*\*\*: p < 0.05/0.001, Dunnett's *post hoc* test for comparisons versus Day 7). Note that clonidine was delivered weekly, whereas the other compounds were delivered daily. Individual animal data is shown in the Appendix.

## Effect of Vehicle

Differences between ipsilateral (injured) and contralateral (normal) joint compression thresholds within the vehicle group were statistically significant at all time points tested on each testing day following MIA injection. A significant increase in the ipsilateral joint compression threshold was observed 1 hour after administration of vehicle and a significant decrease in the contralateral joint compression threshold was observed 5 hours after administration of vehicle compared to baseline values on Day 21. Administration of vehicle had no effect on joint compression thresholds at any other time point when post-treatment joint compression thresholds of vehicle-treated animals were compared to the corresponding pre-treatment values (data not shown).

## Effect of Clonidine

Effects on pre-treatment joint compression thresholds were observed following administration of clonidine (0.1 mg/kg, s.c.) on Days 7, 14, 21 and 28 (**Figure 41**). A significant decrease in pre-treatment joint compression thresholds was observed on Day 14 compared to Day 7 values but not to vehicle-treated animals. A significant increase in pre-treatment joint compression thresholds was observed on Day 21 compared to Day 7 values but not to vehicle-treated animals. A significant decrease in pre-treatment joint compression thresholds was observed on Day 28 compared to vehicle treated animals but not to Day 7 values.

**Figure 41** – Pre-dose effect of weekly clonidine (s.c.) administration on MIA-induced mechanical hyperalgesia

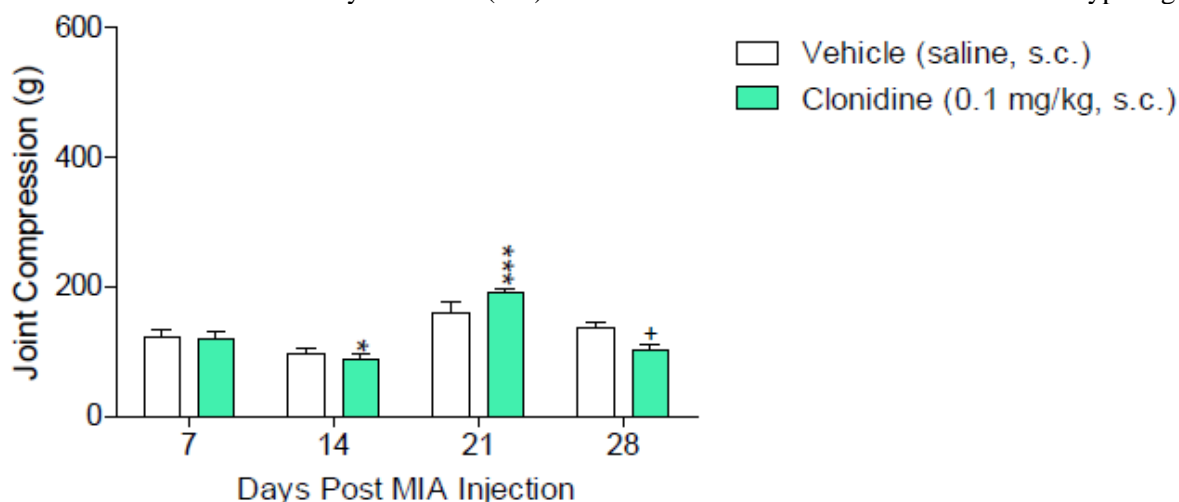

Subcutaneous administration of clonidine (0.1 mg/kg) once a week immediately prior to testing increased joint compression thresholds 1, 3 and 5 hours after administration on Days 7, 14 and 28 (**Figures 42, 43 & 45**, respectively) and 3 hours after administration on Day 21 (**Figure 44**) compared to vehicle treated animals.

**Figure 42** - Effect of clonidine (s.c.) on MIA-induced mechanical hyperalgesia on Day 7

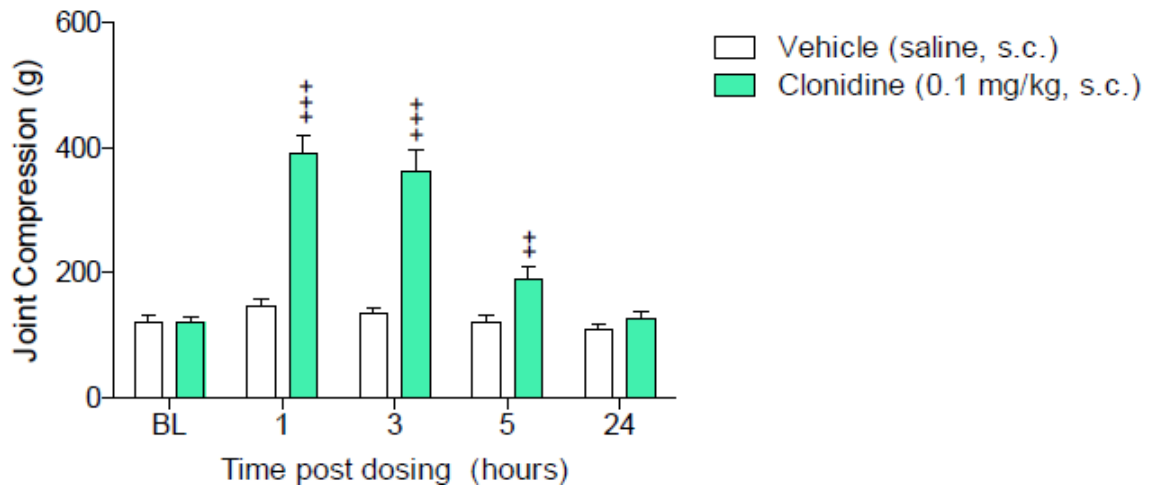

**Figure 43** - Effect of clonidine (s.c.) on MIA-induced mechanical hyperalgesia on Day 14

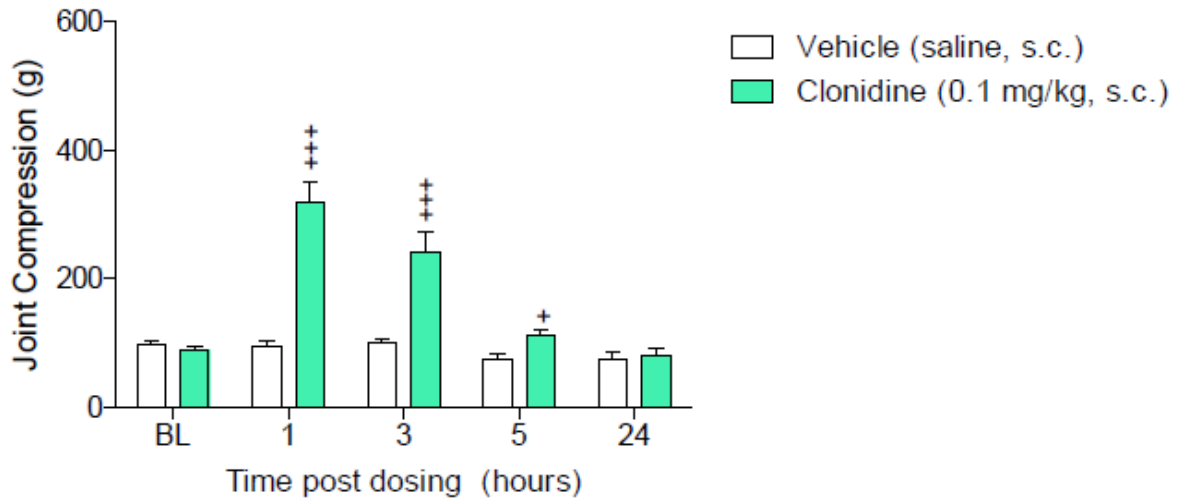

**Figure 44** - Effect of clonidine (s.c.) on MIA-induced mechanical hyperalgesia on Day 21

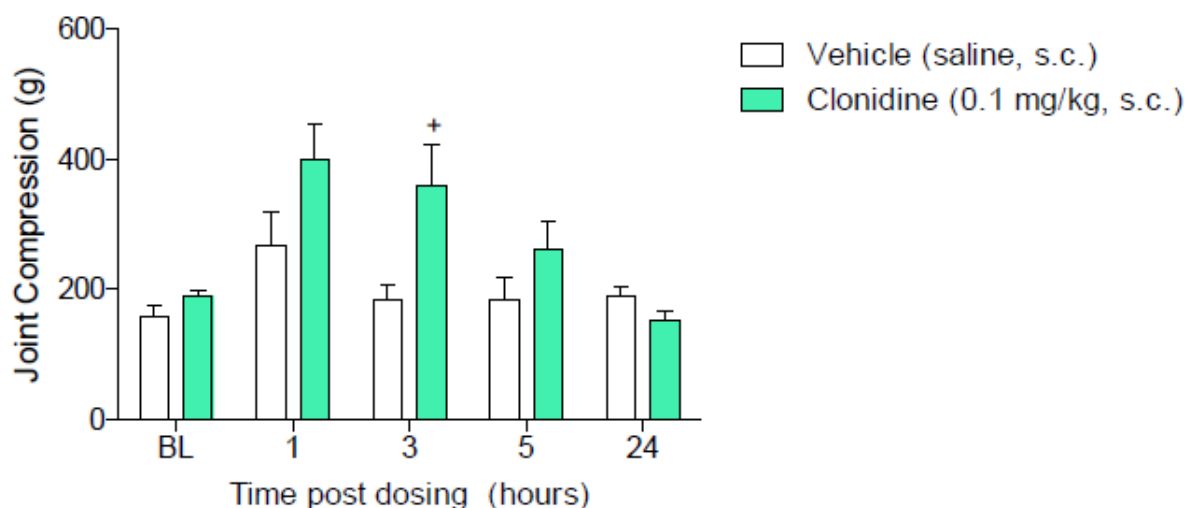

**Figure 45** - Effect of clonidine (s.c.) on MIA-induced mechanical hyperalgesia on Day 28

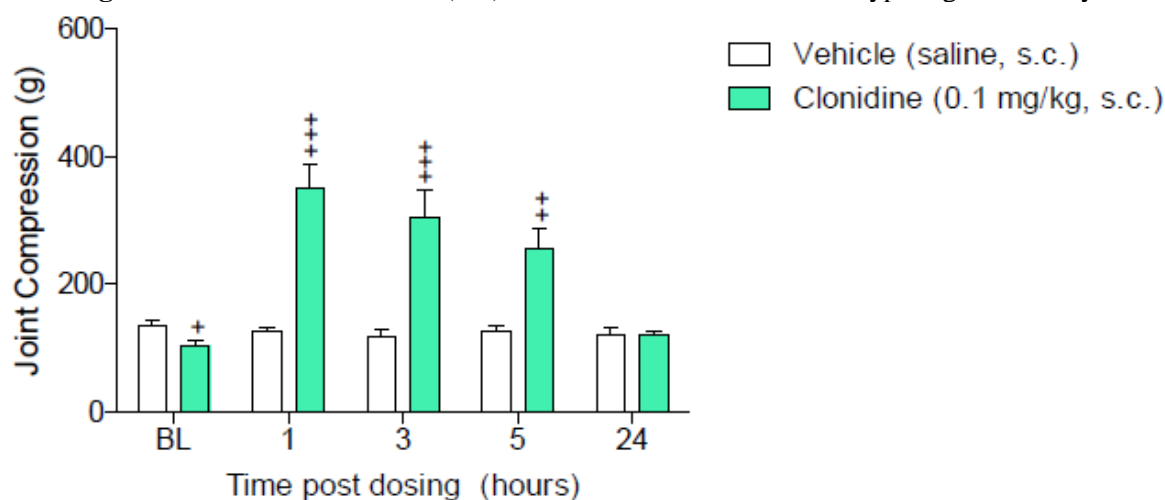

### Effect of Tacrolimus

Daily administration (starting on Day 7) of Tacrolimus (0.3 mg/kg, i.p.) significantly increased pre-treatment joint compression thresholds on Day 21 following MIA injection compared to Day 7 values but not to vehicle-treated animals (**Figure 46**, below). Daily administration of Tacrolimus at the higher dose (0.6 mg/kg, i.p.) had no effect on pre-dosing joint compression thresholds at any time point tested compared to Day 7 values or to vehicle treated animals (not shown).

**Figure 46** - Effect of daily Tacrolimus administration on pre-dosing MIA-induced mechanical hyperalgesia

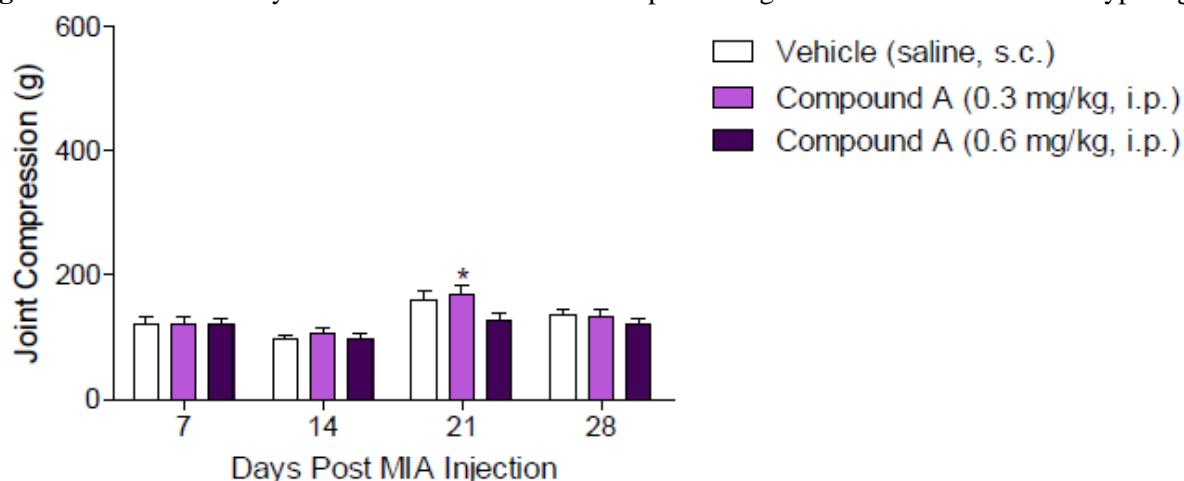

Administration of the higher dose Tacrolimus (0.6 mg/kg, i.p.) significantly increased joint compression thresholds 1 hour after administration on Day 21 (**Figure 47**) compared to pre-treatment values but not to vehicle treated animals. No effect of 0.6 mg/kg Tacrolimus was observed on Day 7, 14 or 28 (not shown) compared to pre-treatment values or to vehicle treated animals. Administration of the lower dose of Tacrolimus (0.3 mg/kg, i.p.) had no effect on joint compression thresholds at any time point tested compared to pre-treatment values or to vehicle treated animals.

**Figure 47** - Effect of Tacrolimus on MIA-induced mechanical hyperalgesia on Day 21

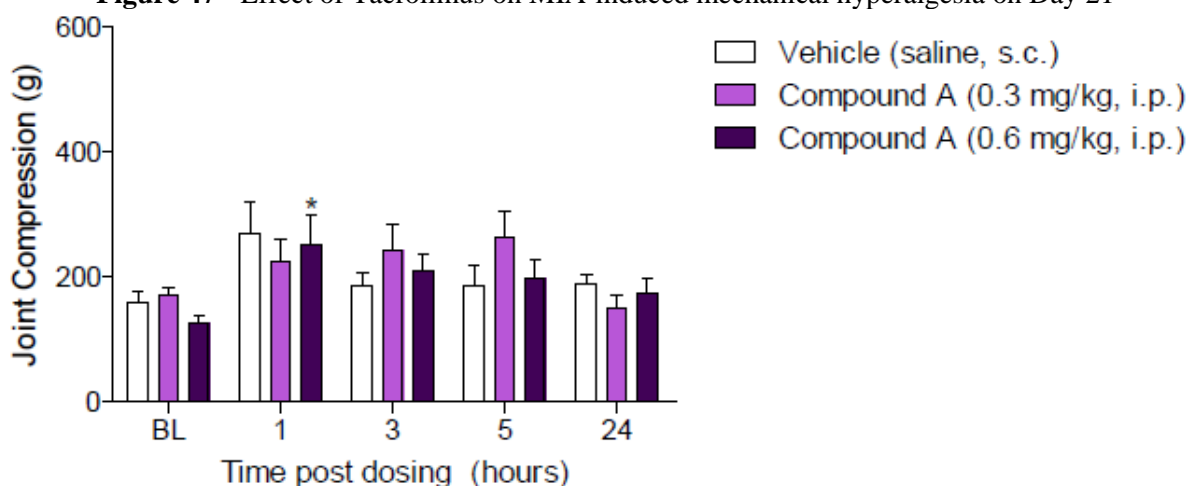

### Effect of Curcumin

Oral daily administration of Curcumin significantly increased joint compression thresholds 1 hour after treatment on Day 7 compared to pre-treatment values (**Figure 48**). A significant increase in pre-dosing joint compression thresholds was also observed after daily administration of Curcumin on Day 21 when compared to Day 7 pre-treatment values (data not shown).



**Figure 48** – Effect of Curcumin on MIA-induced mechanical hyperalgesia on Day 7

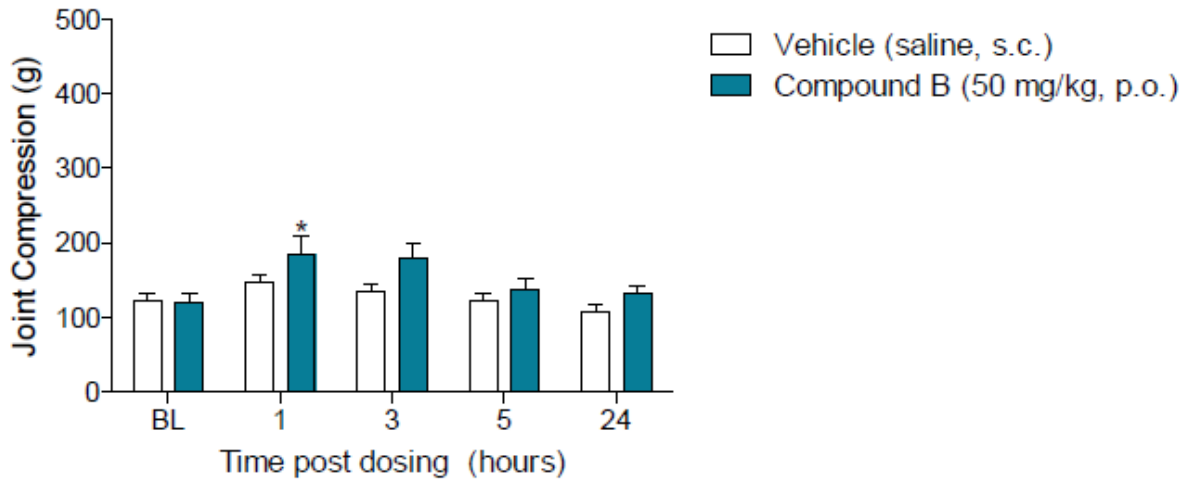

### Effect of Fluocinolone

Subcutaneous daily administration of Fluocinolone (0.01 mg/kg) significantly increased joint compression thresholds 5 hours after treatment on Day 14 compared to vehicle treated animals (**Figure 49**). Daily administration of Fluocinolone had no effect on pre-treatment joint compression thresholds when compared to vehicle treated animals or to Day 7 pre-treatment values (data not shown).

**Figure 49** - Effect of Fluocinolone on MIA-induced mechanical hyperalgesia on Day 14

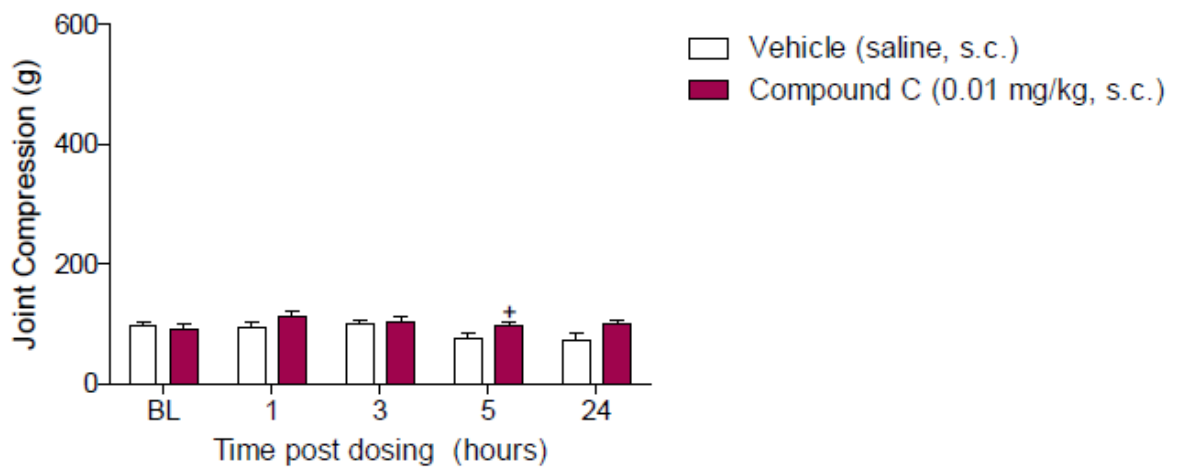

### **MIA Trial 3: Digital Randall-Selitto (dRS) Test**

In Trial 3, the dRS test was used again to measure pain in the MIA model to test efficacy of clonidine, tacrolimus, fluocinolone, meloxicam, tranilast, and triamcinolone hexacetonide when delivered via intra-articular injection. Joint compression thresholds were measured 7, 14, 21 and 28 days following intra-articular injection of MIA (**Figures 50-54** below the descriptions). Joint compression thresholds were comparable among groups ( $p = 1.0$ , one-way ANOVA) on Day 7 after MIA injection. Differences between ipsilateral (injured) and contralateral (normal) joint compression thresholds within the vehicle group were statistically significant at all times post MIA injection, indicating the presence of mechanical hyperalgesia as a result of the MIA injection (see Appendix).

**Excluded animals:** Two animals were excluded from analysis in this study due to errors in dosing. Rat #98 received the wrong compound on Day 14, however, this rat received the correct compound on the other days. Rat #18 received the wrong compound on Day 28. The data from each animal prior to being dosed with the wrong compound was included in the analysis.

#### **1) Saline (vehicle)**

Administration of vehicle (saline, i.a.) had no significant effect on ipsilateral pre-dosing joint compression thresholds on any testing day compared to Day 7 values (**Figure 50**). Administration of saline (vehicle, i.a.) also had no significant effect on joint compression thresholds following dosing at any time point tested compared to the corresponding pre-treatment baseline values.

#### **2) Clonidine**

Systemic clonidine (0.1 mg/kg, s.c.) did not significantly increase ipsilateral pre-treatment joint compression thresholds on Days 14, 21 or 28 compared to Day 7 pre-treatment baseline values. However, a significant decrease in pre-treatment joint compression thresholds was observed on Day 28 compared to Day 7 pre-treatment baseline values (not shown). Similar to Trial 2 above, administration of systemic clonidine (0.1 mg/kg, s.c.) significantly increased joint compression thresholds 1, 3 and 5 hours after administration on Day 7 (**Figure 51**) and 1 and 3 hours after administration on Days 14, 21 and 28 compared to pre-treatment baseline values on the respective testing days (e.g. **Figure 52-54**).

#### **3) IA clonidine (Compound A)**

Weekly intra-articular administration (starting on Day 7) of Clonidine (4.5  $\mu$ g) had no significant effect on pre-dosing joint compression thresholds on any testing day compared to Day 7 values or to vehicle treated animals (**Figure 50**). Intra-articular administration of clonidine significantly increased joint compression thresholds 1 hour after treatment on Day 7 compared to vehicle treated animals (**Figure 51**). Administration of Clonidine had no significant effect on joint compression thresholds at any other time point tested when post-treatment joint compression thresholds were compared to vehicle treated animals

#### **4) IA Tacrolimus (Compound B)**

Weekly intra-articular administration (starting on Day 7) of Tacrolimus (30 ng, i.a.) had no significant effect on pre-treatment joint compression thresholds on any testing day compared to Day 7 values or to vehicle treated animals (**Figure 50**). Intra-articular administration of Tacrolimus also had no significant effect on joint compression thresholds at any time point after administration or day tested compared to vehicle treated animals (**Figure 51-54**).

#### **5) IA Fluocinolone (Compound C)**

Weekly intra-articular administration (starting on Day 7) of Fluocinolone (15 ng, i.a.) had no significant effect on pre-treatment joint compression thresholds on any testing day compared to Day 7 values or to vehicle treated animals (**Figure 50**). However, acute intra-articular administration of Fluocinolone significantly increased joint compression thresholds 1 hour after treatment on Day 7 (**Figure 51**) compared to vehicle treated animals but not at any other time point or day tested. A significant decrease in joint compression threshold compared to vehicle treated animals was observed at the 24 hour time point 28 days after MIA injection (**Figure 54**).

#### **6) IA Meloxicam (Compound D)**

Weekly intra-articular administration (starting on Day 7) of Meloxicam (0.1 mg) had no significant effect on pre-treatment joint compression thresholds on any testing day (**Figure 50**). However, acute intra-articular administration of Meloxicam significantly increased joint compression thresholds 1 hour after treatment on Day 7 (**Figure 51**) and 3 hours after treatment on Day 14 (**Figure 52**) compared to vehicle treated animals. Administration of Meloxicam had no effect on joint compression thresholds at any other time point tested when post-treatment joint compression thresholds were compared to vehicle treated animals.

#### **7) IA Tranilast (Compound E)**

Weekly intra-articular administration (starting on Day 7) of Tranilast (500 ng) had no significant effect on pre-dosing joint compression thresholds on any testing day compared to Day 7 values or to vehicle treated animals (**Figure 50**). However, acute intra-articular administration of Tranilast significantly increased joint compression thresholds 1 and 3 hours after treatment on Day 7 (**Figure 51**) and 1 hour after treatment on Days 14 and 21 (**Figures 52 and 53**) compared to vehicle treated animals.

#### **8) IA Triamcinolone Hexacetonide (TH) (Compound F)**

A significant decrease in pre-dosing joint compression threshold was observed on Day 21 after weekly intra-articular administration (starting on Day 7) of TH (0.15 mg, i.a.) compared to Day 7 pre-treatment baseline values (**Figure 50**). Weekly administration of TH did not significantly increase pre-treatment joint compression thresholds on any testing day compared to Day 7 values or to vehicle treated animals. Intra-articular administration of TH significantly increased joint compression thresholds 3 hours after treatment on Day 7 (**Figure 51**) and 1 hour after treatment on Day 14 (**Figure 52**) compared to vehicle treated animals. A significant decrease in joint compression threshold compared to vehicle treated animals was observed at the 24 hour time point 28 days after MIA injection (**Figure 54**).

**Figure 50** – Pre-dosing effect of weekly intra-articular Test Compound administration on MIA-induced mechanical hyperalgesia in the rat measured prior to dosing and compared to day 7 pretreatment baseline values. Clonidine = A; Tacrolimus = B; Fluocinolone = C; Meloxicam = D; Tranilast = E; Triamcinolone hexacetonide =F.

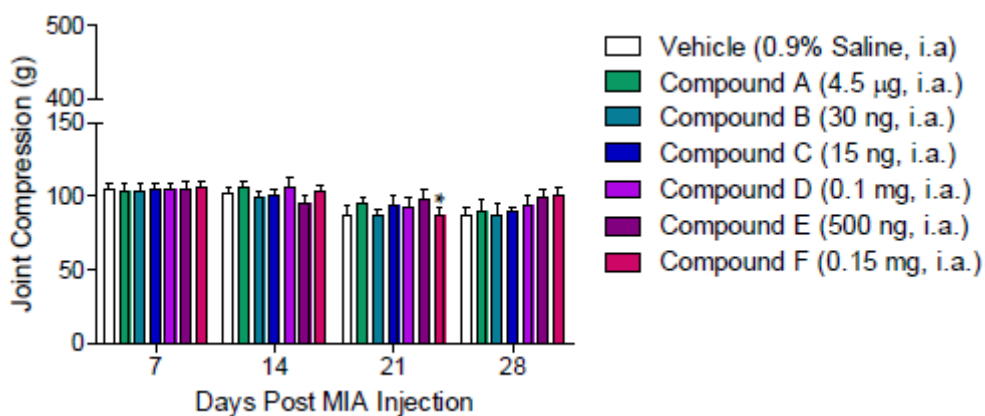

**Figure 51** - Effect of the intra-articular Test Compounds on MIA-induced mechanical hyperalgesia on Day 7. Clonidine = A; Tacrolimus = B; Fluocinolone = C; Meloxicam = D; Tranilast = E; Triamcinolone hexacetonide =F.

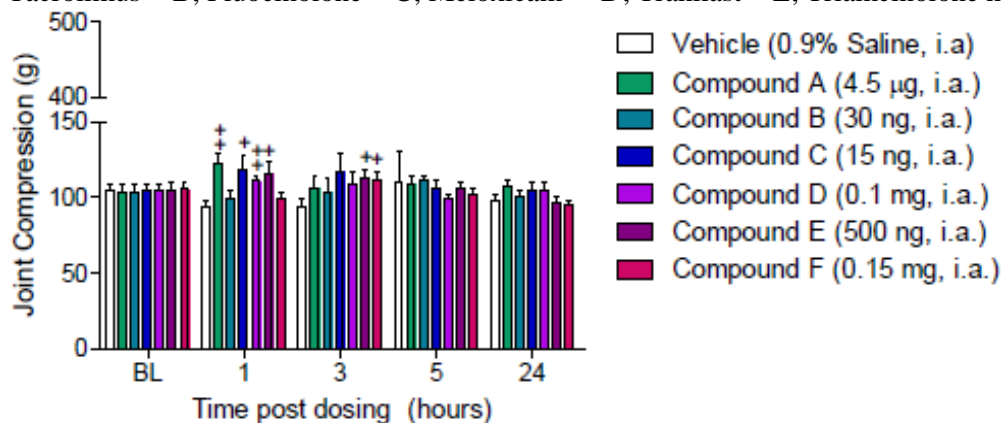

**Figure 52** - Effect of the intra-articular Test Compounds on MIA-induced mechanical hyperalgesia on Day 14. Clonidine = A; Tacrolimus = B; Fluocinolone = C; Meloxicam = D; Tranilast = E; Triamcinolone hexacetonide =F.

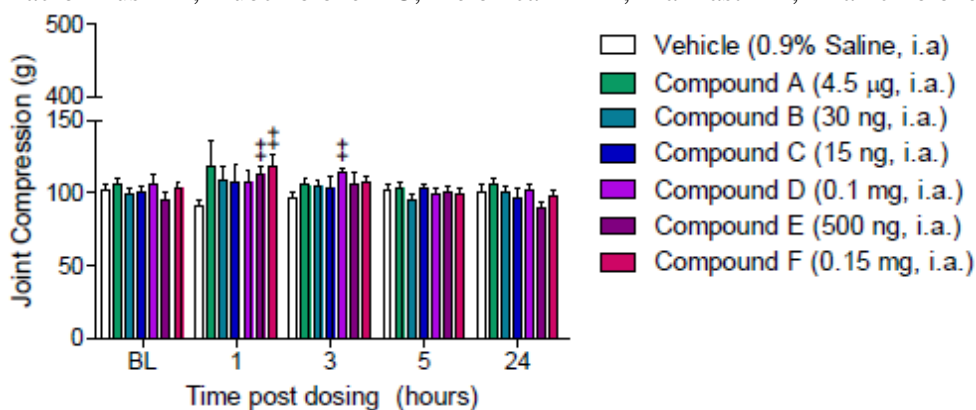

**Figure 53** - Effect of the intra-articular Test Compounds on MIA-induced mechanical hyperalgesia on Day 21. Clonidine = A; Tacrolimus = B; Fluocinolone = C; Meloxicam = D; Tranilast = E; Triamcinolone hexacetonide =F.

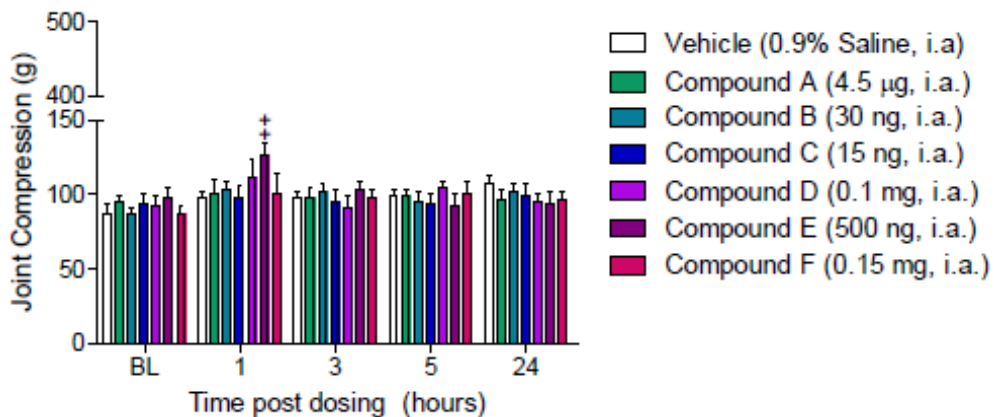

**Figure 54** - Effect of the intra-articular Test Compounds on MIA-induced mechanical hyperalgesia on Day 28. Clonidine = A; Tacrolimus = B; Fluocinolone = C; Meloxicam = D; Tranilast = E; Triamcinolone hexacetonide =F.

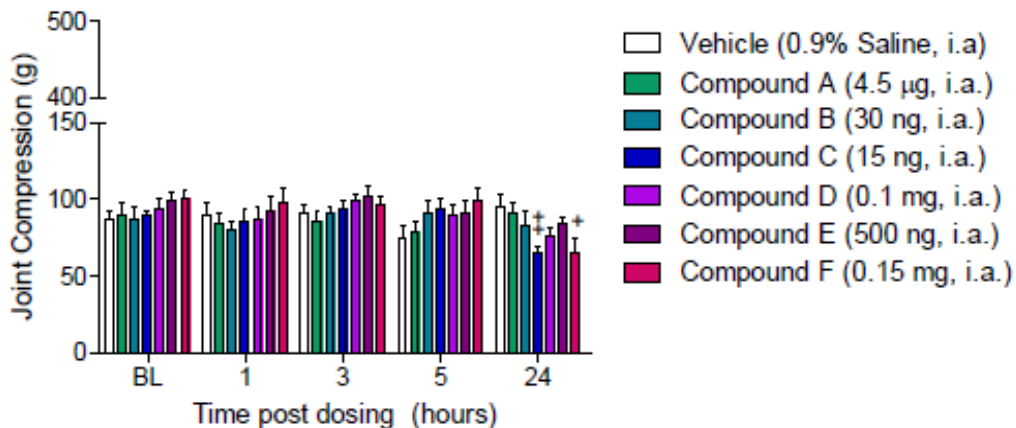

## MIA Model Histopathology Results

### MIA Trial 1: Histopathology

The average percentage chondrocyte degeneration for each group is shown in Table 5.

**Table 5. Percent area chondrocyte necrosis / proteoglycan degeneration MIA Trial 1**

| Group | Necropsy Day | Treatment              | Individual Animal Highest Score |     |     | Group Average |
|-------|--------------|------------------------|---------------------------------|-----|-----|---------------|
|       |              |                        | IAD                             | IAD | IAD |               |
| 1     | 21           | No Treatment           | 4                               | 5   | -   | 4.5           |
| 2     | 7            | Vehicle (5 ml/kg)      | 5                               | 4   | 5   | 4.7           |
| 3     | 14           | Vehicle (5 ml/kg)      | 5                               | 5   | 5   | 5.0           |
| 4     | 21           | Vehicle (5 ml/kg)      | 5                               | 5   | 4   | 4.7           |
| 5     | 29           | Vehicle (5 ml/kg)      | 5                               | 4   | 5   | 4.7           |
| 6     | 29           | Clonidine (100 µg/kg)  | 5                               | 4   | 5   | 4.7           |
| 7     | 29           | Fluocinolone (2 µg/kg) | 3                               | 3   | 3   | 3.0           |

*IAD = Individual animal data highest score of all sites examined for each animal.*

**Table 6. Average percent area chondrocyte necrosis / proteoglycan degeneration MIA Trial 1**

| Group    | Day Necropsy | Treatment    | Average across tibial and femoral cartilage |      |      | Average |
|----------|--------------|--------------|---------------------------------------------|------|------|---------|
|          |              |              | (Individual animal averages)                |      |      | (all)   |
| <b>1</b> | 21           | None         | 3                                           | 4.25 | -    | 3.63    |
| <b>2</b> | 7            | Vehicle      | 4.25                                        | 4.25 | 4.5  | 4.33    |
| <b>3</b> | 14           | Vehicle      | 4.5                                         | 4.75 | 5.0  | 4.75    |
| <b>4</b> | 21           | Vehicle      | 4.5                                         | 4.5  | 2.75 | 3.9     |
| <b>5</b> | 29           | Vehicle      | 3.75                                        | 4.75 | 5.0  | 4.5     |
| <b>6</b> | 29           | Clonidine    | 4.5                                         | 3.5  | 4.5  | 4.17    |
| <b>7</b> | 29           | Fluocinolone | 1                                           | 3    | 2.5  | 2.17    |

## Semi-quantitative Analysis of Histological Sections MIA Trial 1

**Table 7. Unmasked individual animal histopathological data for each treatment in MIA Trial 1**

A) Group 1. Individual animal data after 21 days of no treatment

| Group<br>Animal ID<br>Site                                       | 1 - No Treatment - Necropsy Day 21 |     |     |     |     |     |     |     |
|------------------------------------------------------------------|------------------------------------|-----|-----|-----|-----|-----|-----|-----|
|                                                                  | 3                                  |     |     |     | 21  |     |     |     |
|                                                                  | MTP                                | MFC | LTP | LFC | MTP | MFC | LTP | LFC |
| <b>% Area of Chondrocyte Necrosis/ proteoglycan degeneration</b> | 4                                  | 2   | 4   | 2   | 4   | 4   | 4   | 5   |
| <b>Safranin - O</b>                                              |                                    |     |     |     |     |     |     |     |
| decreased proteoglycan                                           | 2                                  | 2   | 2   | 2   | 2   | 2   | 2   | 2   |
| <b>Synovial membrane</b>                                         |                                    |     |     |     |     |     |     |     |
| fibrin/edema                                                     | 0                                  | 0   | 0   | 0   | 0   | 0   | 0   | 0   |
| lymphocytes                                                      | 0                                  | 0   | 0   | 0   | 0   | 0   | 0   | 0   |
| macrophages                                                      | 0                                  | 0   | 0   | 0   | 0   | 0   | 0   | 0   |
| neutrophils                                                      | 0                                  | 0   | 0   | 0   | 0   | 0   | 0   | 0   |
| hyperplasia                                                      | 0                                  | 0   | 0   | 0   | 0   | 0   | 0   | 0   |
| osteophytes                                                      | 0                                  | 0   | 0   | 0   | 0   | 0   | 0   | 0   |
| plasma cells                                                     | 0                                  | 0   | 0   | 0   | 0   | 0   | 0   | 0   |
| multinucleated cells                                             | 0                                  | 0   | 0   | 0   | 0   | 0   | 0   | 0   |
| <b>Subchondral bone</b>                                          |                                    |     |     |     |     |     |     |     |
| increased osteoclasts                                            | 0                                  | 0   | 0   | 0   | 0   | 0   | 0   | 0   |
| increased osteoblasts                                            | 0                                  | 0   | 0   | 0   | 0   | 0   | 0   | 0   |
| increased fibrous stroma                                         | +                                  | +   | +   | +   | +   | +   | +   | +   |
| decreased hematopoietic tissue                                   | +                                  | +   | +   | +   | +   | +   | +   | +   |
| collapse of trabeculae                                           | +                                  | +   | +   | +   | +   | +   | +   | +   |
| bone necrosis                                                    | 0                                  | 0   | 0   | 0   | 0   | 0   | 0   | 0   |
| bone regeneration                                                | 0                                  | 0   | 0   | 0   | 0   | 0   | 0   | 0   |
| subchondral cyst                                                 | 0                                  | 0   | 0   | 0   | 0   | 0   | 0   | 0   |
| lymphocytes                                                      | 0                                  | 0   | 0   | 0   | 0   | 0   | 0   | 0   |
| macrophages                                                      | 0                                  | 0   | 0   | 0   | 0   | 0   | 0   | 0   |
| neutrophils                                                      | 0                                  | 0   | 0   | 0   | 0   | 0   | 0   | 0   |
| plasma cells                                                     | 0                                  | 0   | 0   | 0   | 0   | 0   | 0   | 0   |
| multinucleated cells                                             | 0                                  | 0   | 0   | 0   | 0   | 0   | 0   | 0   |
| <b>Articular Cartilage</b>                                       |                                    |     |     |     |     |     |     |     |
| chondrocyte necrosis                                             | +                                  | +   | +   | +   | +   | +   | +   | +   |
| erosion/fissures of articular surface                            | +                                  | +   | +   | +   | +   | +   | +   | +   |
| decreased thickness                                              | +                                  | +   | +   | +   | 0   | 0   | 0   | 0   |
| cartilage matrix degeneration                                    | +                                  | +   | +   | +   | +   | +   | +   | +   |
| clustering chondrocytes                                          | 0                                  | +   | 0   | +   | +   | +   | +   | 0   |
| chondrocyte proliferation                                        | 0                                  | +   | 0   | +   | 0   | 0   | 0   | 0   |
| fibrocartilage                                                   | 0                                  | 0   | 0   | 0   | 0   | 0   | 0   | 0   |

B) Group 2. Individual animal data after 7 days of treatment with vehicle alone

| Group                                                            | 2 - Vehicle (5 ml/kg) - Necropsy Day 7 |     |     |     |     |     |     |     |     |     |     |     |
|------------------------------------------------------------------|----------------------------------------|-----|-----|-----|-----|-----|-----|-----|-----|-----|-----|-----|
| Animal ID                                                        | 54                                     |     |     |     | 55  |     |     |     | 56  |     |     |     |
| Site                                                             | MTP                                    | MFC | LTP | LFC | MTP | MFC | LTP | LFC | MTP | MFC | LTP | LFC |
| <b>% Area of Chondrocyte Necrosis/ proteoglycan degeneration</b> | 4                                      | 5   | 4   | 4   | 4   | 4   | 4   | 4   | 5   | 4   | 4   | 5   |
| <b>Safranin - O</b>                                              |                                        |     |     |     |     |     |     |     |     |     |     |     |
| decreased proteoglycan                                           | 3                                      | 2   | 3   | 2   | 3   | 3   | 3   | 4   | 3   | 3   | 3   | 4   |
| <b>Synovial membrane</b>                                         |                                        |     |     |     |     |     |     |     |     |     |     |     |
| fibrin/edema                                                     | 0                                      | 0   | 0   | 0   | 0   | 0   | 0   | 0   | 0   | 0   | 0   | 0   |
| lymphocytes                                                      | 0                                      | 0   | 0   | 0   | 0   | 0   | 0   | 0   | 0   | 0   | 0   | 0   |
| macrophages                                                      | 0                                      | 0   | 0   | 0   | 0   | 0   | 0   | 0   | 0   | 0   | 0   | 0   |
| neutrophils                                                      | 0                                      | 0   | 0   | 0   | 0   | 0   | 0   | 0   | 0   | 0   | 0   | 0   |
| hyperplasia                                                      | 0                                      | 0   | 0   | 0   | 0   | 0   | 0   | 0   | 0   | 0   | 0   | 0   |
| osteophytes                                                      | 0                                      | 0   | 0   | 0   | 0   | 0   | 0   | 0   | 0   | 0   | 0   | 0   |
| plasma cells                                                     | 0                                      | 0   | 0   | 0   | 0   | 0   | 0   | 0   | 0   | 0   | 0   | 0   |
| multinucleated cells                                             | 0                                      | 0   | 0   | 0   | 0   | 0   | 0   | 0   | 0   | 0   | 0   | 0   |
| <b>Subchondral bone</b>                                          |                                        |     |     |     |     |     |     |     |     |     |     |     |
| increased osteoclasts                                            | +                                      | 0   | +   | 0   | +   | +   | +   | +   | +   | 0   | +   | 0   |
| increased osteoblasts                                            | +                                      | 0   | +   | 0   | +   | +   | +   | +   | +   | 0   | +   | 0   |
| increased fibrous stroma                                         | +                                      | +   | +   | +   | +   | +   | +   | +   | +   | 0   | +   | 0   |
| decreased hematopoietic tissue                                   | 0                                      | 0   | 0   | 0   | 0   | 0   | 0   | 0   | 0   | 0   | 0   | 0   |
| collapse of trabeculae                                           | +                                      | +   | +   | +   | +   | +   | +   | +   | +   | +   | +   | +   |
| bone necrosis                                                    | +                                      | +   | +   | +   | +   | +   | +   | +   | +   | +   | +   | +   |
| bone regeneration                                                | 0                                      | 0   | 0   | 0   | 0   | 0   | 0   | 0   | +   | 0   | +   | 0   |
| subchondral cyst                                                 | 0                                      | 0   | 0   | 0   | 0   | 0   | 0   | 0   | 0   | 0   | 0   | 0   |
| lymphocytes                                                      | 0                                      | 0   | 0   | 0   | 0   | 0   | 0   | 0   | 0   | 0   | 0   | 0   |
| macrophages                                                      | 0                                      | 0   | 0   | 0   | 0   | 0   | 0   | 0   | 0   | 0   | 0   | 0   |
| neutrophils                                                      | 0                                      | 0   | 0   | 0   | 0   | 0   | 0   | 0   | 0   | 0   | 0   | 0   |
| plasma cells                                                     | 0                                      | 0   | 0   | 0   | 0   | 0   | 0   | 0   | 0   | 0   | 0   | 0   |
| multinucleated cells                                             | 0                                      | 0   | 0   | 0   | 0   | 0   | 0   | 0   | 0   | 0   | 0   | 0   |
| <b>Articular Cartilage</b>                                       |                                        |     |     |     |     |     |     |     |     |     |     |     |
| chondrocyte necrosis                                             | +                                      | +   | +   | +   | +   | +   | +   | +   | +   | +   | +   | +   |
| erosion/fissures of articular surface                            | +                                      | +   | +   | +   | 0   | 0   | +   | 0   | +   | +   | +   | +   |
| decreased thickness                                              | +                                      | +   | +   | +   | +   | +   | +   | +   | 0   | 0   | 0   | 0   |
| cartilage matrix degeneration                                    | +                                      | +   | +   | +   | +   | +   | +   | +   | +   | +   | +   | +   |
| clustering chondrocytes                                          | 0                                      | 0   | 0   | 0   | 0   | 0   | 0   | 0   | 0   | 0   | 0   | 0   |
| chondrocyte proliferation                                        | 0                                      | 0   | 0   | 0   | 0   | 0   | 0   | 0   | 0   | 0   | 0   | 0   |
| fibrocartilage                                                   | 0                                      | 0   | 0   | 0   | 0   | 0   | 0   | 0   | 0   | 0   | 0   | 0   |



C) Group 3. Individual animal data after 14 days of treatment with vehicle alone

| Group                                                            | 3 - Vehicle (5ml/kg) - Necropsy Day 14 |     |     |     |     |     |     |     |     |     |     |     |
|------------------------------------------------------------------|----------------------------------------|-----|-----|-----|-----|-----|-----|-----|-----|-----|-----|-----|
| Animal ID                                                        | 38                                     |     |     |     | 46  |     |     |     | 52  |     |     |     |
| Site                                                             | MTP                                    | MFC | LTP | LFC | MTP | MFC | LTP | LFC | MTP | MFC | LTP | LFC |
| <b>% Area of Chondrocyte Necrosis/ proteoglycan degeneration</b> | 4                                      | 5   | 4   | 5   | 4   | 5   | 5   | 5   | 5   | 5   | 5   | 5   |
| <b>Safranin - O</b>                                              |                                        |     |     |     |     |     |     |     |     |     |     |     |
| decreased proteoglycan                                           | 3                                      | 3   | 3   | 3   | 3   | 3   | 3   | 3   | 3   | 3   | 4   | 4   |
| <b>Synovial membrane</b>                                         |                                        |     |     |     |     |     |     |     |     |     |     |     |
| fibrin/edema                                                     | 0                                      | 0   | 0   | 0   | 0   | 0   | 0   | 0   | 0   | 0   | 0   | 0   |
| lymphocytes                                                      | 0                                      | 0   | 0   | 0   | 0   | 0   | 0   | 0   | 0   | 0   | 0   | 0   |
| macrophages                                                      | 0                                      | 0   | 0   | 0   | 0   | 0   | 0   | 0   | 0   | 0   | 0   | 0   |
| neutrophils                                                      | 0                                      | 0   | 0   | 0   | 0   | 0   | 0   | 0   | 0   | 0   | 0   | 0   |
| hyperplasia                                                      | 0                                      | 0   | 0   | 0   | 0   | 0   | 0   | 0   | 0   | 0   | 0   | 0   |
| osteophytes                                                      | 0                                      | 0   | 0   | 0   | 0   | 0   | 0   | 0   | 0   | 0   | 0   | 0   |
| plasma cells                                                     | 0                                      | 0   | 0   | 0   | 0   | 0   | 0   | 0   | 0   | 0   | 0   | 0   |
| multinucleated cells                                             | 0                                      | 0   | 0   | 0   | 0   | 0   | 0   | 0   | 0   | 0   | 0   | 0   |
| <b>Subchondral bone</b>                                          |                                        |     |     |     |     |     |     |     |     |     |     |     |
| increased osteoclasts                                            | +                                      | +   | +   | +   | +   | +   | +   | +   | +   | +   | +   | +   |
| increased osteoblasts                                            | +                                      | +   | +   | +   | +   | +   | +   | +   | +   | +   | +   | +   |
| increased fibrous stroma                                         | +                                      | +   | +   | +   | +   | +   | +   | +   | +   | +   | +   | +   |
| decreased hematopoietic tissue                                   | +                                      | +   | +   | +   | +   | +   | +   | +   | +   | +   | +   | +   |
| collapse of trabeculae                                           | 0                                      | 0   | 0   | 0   | +   | 0   | +   | 0   | +   | +   | +   |     |
| bone necrosis                                                    | +                                      | +   | +   | +   | +   | +   | +   | +   | +   | +   | +   | +   |
| bone regeneration                                                | 0                                      | 0   | 0   | 0   | 0   | 0   | 0   | 0   | 0   | 0   | 0   | 0   |
| subchondral cyst                                                 | 0                                      | 0   | 0   | 0   | 0   | 0   | 0   | 0   | 0   | 0   | 0   | 0   |
| lymphocytes                                                      | 0                                      | 0   | 0   | 0   | 0   | 0   | 0   | 0   | 0   | 0   | 0   | 0   |
| macrophages                                                      | 0                                      | 0   | 0   | 0   | 0   | 0   | 0   | 0   | 0   | 0   | 0   | 0   |
| neutrophils                                                      | 0                                      | 0   | 0   | 0   | 0   | 0   | 0   | 0   | 0   | 0   | 0   | 0   |
| plasma cells                                                     | 0                                      | 0   | 0   | 0   | 0   | 0   | 0   | 0   | 0   | 0   | 0   | 0   |
| multinucleated cells                                             | 0                                      | 0   | 0   | 0   | 0   | 0   | 0   | 0   | 0   | 0   | 0   | 0   |
| <b>Articular Cartilage</b>                                       |                                        |     |     |     |     |     |     |     |     |     |     |     |
| chondrocyte necrosis                                             | +                                      | +   | +   | +   | +   | +   | +   | +   | +   | +   | +   | +   |
| erosion/fissures of articular surface                            | 0                                      | 0   | 0   | +   | 0   | 0   | 0   | +   | 0   | 0   | 0   | 0   |
| decreased thickness                                              | 0                                      | 0   | 0   | 0   | 0   | 0   | 0   | 0   | 0   | 0   | 0   | 0   |
| cartilage matrix degeneration                                    | +                                      | +   | +   | +   | +   | +   | +   | +   | +   | +   | +   | +   |
| clustering chondrocytes                                          | 0                                      | 0   | 0   | 0   | 0   | 0   | 0   | 0   | 0   | 0   | 0   | 0   |
| chondrocyte proliferation                                        | 0                                      | 0   | 0   | 0   | 0   | 0   | 0   | 0   | 0   | 0   | 0   | 0   |
| fibrocartilage                                                   | 0                                      | 0   | 0   | 0   | 0   | 0   | 0   | 0   | 0   | 0   | 0   | 0   |

D) Group 4. Individual animal data after 21 days of treatment with vehicle alone

| Group<br>Animal ID<br>Site                                       | 4 - Vehicle (5ml/kg) - Necropsy Day 21 |     |     |     |     |     |     |     |     |     |     |     |
|------------------------------------------------------------------|----------------------------------------|-----|-----|-----|-----|-----|-----|-----|-----|-----|-----|-----|
|                                                                  | 12                                     |     |     |     | 22  |     |     |     | 29  |     |     |     |
|                                                                  | MTP                                    | MFC | LTP | LFC | MTP | MFC | LTP | LFC | MTP | MFC | LTP | LFC |
| <b>% Area of Chondrocyte Necrosis/ proteoglycan degeneration</b> | 4                                      | 5   | 4   | 5   | 4   | 5   | 4   | 5   | 4   | 3   | 2   | 2   |
| <b>Safranin - O</b>                                              |                                        |     |     |     |     |     |     |     |     |     |     |     |
| decreased proteoglycan                                           | 3                                      | 3   | 3   | 3   | 4   | 3   | 4   | 3   | 2   | 1   | 1   | 1   |
| <b>Synovial membrane</b>                                         |                                        |     |     |     |     |     |     |     |     |     |     |     |
| fibrin/edema                                                     | 0                                      | 0   | 0   | 0   | 0   | 0   | 0   | 0   | 0   | 0   | 0   | 0   |
| lymphocytes                                                      | 0                                      | 0   | 0   | 0   | 0   | 0   | 0   | 0   | 0   | 0   | 0   | 0   |
| macrophages                                                      | 0                                      | 0   | 0   | 0   | 0   | 0   | 0   | 0   | 0   | 0   | 0   | 0   |
| neutrophils                                                      | 0                                      | 0   | 0   | 0   | 0   | 0   | 0   | 0   | 0   | 0   | 0   | 0   |
| hyperplasia                                                      | 0                                      | 0   | 0   | 0   | 0   | 0   | 0   | 0   | 0   | 0   | 0   | 0   |
| osteophytes                                                      | 0                                      | +   | 0   | 0   | 0   | 0   | 0   | 0   | 0   | 0   | 0   | 0   |
| plasma cells                                                     | 0                                      | 0   | 0   | 0   | 0   | 0   | 0   | 0   | 0   | 0   | 0   | 0   |
| multinucleated cells                                             | 0                                      | 0   | 0   | 0   | 0   | 0   | 0   | 0   | 0   | 0   | 0   | 0   |
| <b>Subchondral bone</b>                                          |                                        |     |     |     |     |     |     |     |     |     |     |     |
| increased osteoclasts                                            | +                                      | +   | +   | +   | +   | +   | +   | +   | 0   | 0   | 0   | 0   |
| increased osteoblasts                                            | +                                      | +   | +   | +   | +   | +   | +   | +   | 0   | 0   | 0   | 0   |
| increased fibrous stroma                                         | +                                      | +   | +   | +   | +   | +   | +   | +   | 0   | 0   | 0   | 0   |
| decreased hematopoietic tissue                                   | +                                      | +   | +   | +   | 0   | 0   | 0   | 0   | 0   | 0   | 0   | 0   |
| collapse of trabeculae                                           | +                                      | +   | +   | +   | +   | +   | +   | +   | 0   | 0   | 0   | 0   |
| bone necrosis                                                    | +                                      | +   | +   | +   | 0   | 0   | 0   | 0   | 0   | 0   | 0   | 0   |
| bone regeneration                                                | 0                                      | 0   | 0   | 0   | 0   | 0   | 0   | 0   | 0   | 0   | 0   | 0   |
| subchondral cyst                                                 | 0                                      | 0   | 0   | 0   | 0   | 0   | 0   | 0   | 0   | 0   | 0   | 0   |
| lymphocytes                                                      | 0                                      | 0   | 0   | 0   | 0   | 0   | 0   | 0   | 0   | 0   | 0   | 0   |
| macrophages                                                      | 0                                      | 0   | 0   | 0   | 0   | 0   | 0   | 0   | 0   | 0   | 0   | 0   |
| neutrophils                                                      | 0                                      | 0   | 0   | 0   | 0   | 0   | 0   | 0   | 0   | 0   | 0   | 0   |
| plasma cells                                                     | 0                                      | 0   | 0   | 0   | 0   | 0   | 0   | 0   | 0   | 0   | 0   | 0   |
| multinucleated cells                                             | 0                                      | 0   | 0   | 0   | 0   | 0   | 0   | 0   | 0   | 0   | 0   | 0   |
| <b>Articular Cartilage</b>                                       |                                        |     |     |     |     |     |     |     |     |     |     |     |
| chondrocyte necrosis                                             | +                                      | +   | +   | +   | +   | +   | +   | +   | +   | +   | +   | +   |
| erosion/fissures of articular surface                            | +                                      | +   | +   | +   | +   | +   | +   | +   | 0   | 0   | 0   | 0   |
| decreased thickness                                              | 0                                      | 0   | 0   | 0   | +   | +   | +   | +   | 0   | 0   | 0   | 0   |
| cartilage matrix degeneration                                    | +                                      | +   | +   | +   | +   | +   | +   | +   | +   | +   | +   | +   |
| clustering chondrocytes                                          | 0                                      | 0   | 0   | 0   | 0   | 0   | 0   | 0   | +   | +   | +   | +   |
| chondrocyte proliferation                                        | 0                                      | 0   | 0   | 0   | 0   | 0   | 0   | 0   | 0   | 0   | 0   | 0   |
| fibrocartilage                                                   | 0                                      | 0   | 0   | 0   | 0   | 0   | 0   | 0   | 0   | 0   | 0   | 0   |

E) Group 5. Individual animal data after 29 days of treatment with vehicle alone

| Group<br>Animal ID<br>Site                                       | 5 - Vehicle (5ml/kg) - Necropsy Day 29 |     |     |     |     |     |     |     |     |     |     |     |
|------------------------------------------------------------------|----------------------------------------|-----|-----|-----|-----|-----|-----|-----|-----|-----|-----|-----|
|                                                                  | 23                                     |     |     |     | 31  |     |     |     | 41  |     |     |     |
|                                                                  | MTP                                    | MFC | LTP | LFC | MTP | MFC | LTP | LFC | MTP | MFC | LTP | LFC |
| <b>% Area of Chondrocyte Necrosis/ proteoglycan degeneration</b> | 4                                      | 3   | 5   | 3   | 4   | 3   | 4   | 4   | 5   | 5   | 5   | 5   |
| <b>Safranin - O</b>                                              |                                        |     |     |     |     |     |     |     |     |     |     |     |
| decreased proteoglycan                                           | 4                                      | 3   | 3   | 3   | 3   | 3   | 3   | 3   | 3   | 3   | 3   | 3   |
| <b>Synovial membrane</b>                                         |                                        |     |     |     |     |     |     |     |     |     |     |     |
| fibrin/edema                                                     | 0                                      | 0   | 0   | 0   | 0   | 0   | 0   | 0   | 0   | 0   | 0   | 0   |
| lymphocytes                                                      | 0                                      | 0   | 0   | 0   | 0   | 0   | 0   | 0   | 0   | 0   | 0   | 0   |
| macrophages                                                      | 0                                      | 0   | 0   | 0   | 0   | 0   | 0   | 0   | 0   | 0   | 0   | 0   |
| neutrophils                                                      | 0                                      | 0   | 0   | 0   | 0   | 0   | 0   | 0   | 0   | 0   | 0   | 0   |
| hyperplasia                                                      | 0                                      | 0   | 0   | 0   | 0   | 0   | 0   | 0   | 0   | 0   | 0   | 0   |
| osteophytes                                                      | 0                                      | 0   | 0   | 0   | 0   | 0   | 0   | 0   | 0   | 0   | 0   | 0   |
| plasma cells                                                     | 0                                      | 0   | 0   | 0   | 0   | 0   | 0   | 0   | 0   | 0   | 0   | 0   |
| multinucleated cells                                             | 0                                      | 0   | 0   | 0   | 0   | 0   | 0   | 0   | 0   | 0   | 0   | 0   |
| <b>Subchondral bone</b>                                          |                                        |     |     |     |     |     |     |     |     |     |     |     |
| increased osteoclasts                                            | 0                                      | 0   | 0   | 0   | 0   | 0   | 0   | 0   | 0   | 0   | 0   | 0   |
| increased osteoblasts                                            | 0                                      | 0   | 0   | 0   | 0   | 0   | 0   | 0   | 0   | 0   | 0   | 0   |
| increased fibrous stroma                                         | 0                                      | 0   | 0   | 0   | 0   | 0   | 0   | 0   | +   | +   | +   | +   |
| decreased hematopoietic tissue                                   | +                                      | 0   | +   | 0   | +   | +   | +   | +   | +   | +   | +   | +   |
| collapse of trabeculae                                           | +                                      | 0   | +   | 0   | +   | +   | +   | +   | +   | +   | +   | +   |
| bone necrosis                                                    | 0                                      | 0   | 0   | +   | 0   | 0   | 0   | 0   | +   | +   | +   | +   |
| bone regeneration                                                | 0                                      | 0   | 0   | 0   | 0   | 0   | 0   | 0   | 0   | 0   | 0   | 0   |
| subchondral cyst                                                 | 0                                      | 0   | 0   | 0   | 0   | 0   | 0   | 0   | 0   | 0   | 0   | 0   |
| lymphocytes                                                      | 0                                      | 0   | 0   | 0   | 0   | 0   | 0   | 0   | 0   | 0   | 0   | 0   |
| macrophages                                                      | 0                                      | 0   | 0   | 0   | 0   | 0   | 0   | 0   | 0   | 0   | 0   | 0   |
| neutrophils                                                      | 0                                      | 0   | 0   | 0   | 0   | 0   | 0   | 0   | 0   | 0   | 0   | 0   |
| plasma cells                                                     | 0                                      | 0   | 0   | 0   | 0   | 0   | 0   | 0   | 0   | 0   | 0   | 0   |
| multinucleated cells                                             | 0                                      | 0   | 0   | 0   | 0   | 0   | 0   | 0   | 0   | 0   | 0   | 0   |
| <b>Articular Cartilage</b>                                       |                                        |     |     |     |     |     |     |     |     |     |     |     |
| chondrocyte necrosis                                             | +                                      | +   | +   | +   | +   | +   | +   | +   | +   | +   | +   | +   |
| erosion/fissures of articular surface                            | +                                      | +   | +   | +   | +   | +   | +   | +   | +   | +   | +   | +   |
| decreased thickness                                              | +                                      | +   | +   | +   | +   | +   | +   | +   | +   | +   | +   | +   |
| cartilage matrix degeneration                                    | +                                      | +   | +   | +   | +   | +   | +   | +   | +   | +   | +   | +   |
| clustering chondrocytes                                          | 0                                      | +   | 0   | 0   | +   | +   | +   | +   | 0   | 0   | 0   | 0   |
| chondrocyte proliferation                                        | 0                                      | +   | 0   | 0   | 0   | +   | 0   | +   | 0   | 0   | 0   | 0   |
| fibrocartilage                                                   | 0                                      | 0   | 0   | 0   | 0   | 0   | 0   | 0   | 0   | 0   | 0   | 0   |

F) Group 6. Clonidine treated animals (100 ug/kg) necropsied at day 29

| Group<br>Animal ID<br>Site                                       | 6 - Clonidine (100 µg/kg) - Necropsy Day 29 |     |     |     |     |     |     |     |     |     |     |     |
|------------------------------------------------------------------|---------------------------------------------|-----|-----|-----|-----|-----|-----|-----|-----|-----|-----|-----|
|                                                                  | 28                                          |     |     |     | 32  |     |     |     | 36  |     |     |     |
|                                                                  | MTP                                         | MFC | LTP | LFC | MTP | MFC | LTP | LFC | MTP | MFC | LTP | LFC |
| <b>% Area of Chondrocyte Necrosis/ proteoglycan degeneration</b> | 5                                           | 4   | 5   | 4   | 3   | 3   | 4   | 4   | 5   | 4   | 4   | 5   |
| <b>Safranin - O</b>                                              |                                             |     |     |     |     |     |     |     |     |     |     |     |
| decreased proteoglycan                                           | 3                                           | 3   | 3   | 3   | 3   | 3   | 3   | 3   | 4   | 3   | 3   | 3   |
| <b>Synovial membrane</b>                                         |                                             |     |     |     |     |     |     |     |     |     |     |     |
| fibrin/edema                                                     | 0                                           | 0   | 0   | 0   | 0   | 0   | 0   | 0   | 0   | 0   | 0   | 0   |
| lymphocytes                                                      | 0                                           | 0   | 0   | 0   | 0   | 0   | 0   | 0   | 0   | 0   | 0   | 0   |
| macrophages                                                      | 0                                           | 0   | 0   | 0   | 0   | 0   | 0   | 0   | 0   | 0   | 0   | 0   |
| neutrophils                                                      | 0                                           | 0   | 0   | 0   | 0   | 0   | 0   | 0   | 0   | 0   | 0   | 0   |
| hyperplasia                                                      | 0                                           | 0   | 0   | 0   | 0   | 0   | 0   | 0   | 0   | 0   | 0   | 0   |
| osteophytes                                                      | 0                                           | 0   | 0   | 0   | 0   | 0   | 0   | 0   | 0   | 0   | 0   | 0   |
| plasma cells                                                     | 0                                           | 0   | 0   | 0   | 0   | 0   | 0   | 0   | 0   | 0   | 0   | 0   |
| multinucleated cells                                             | 0                                           | 0   | 0   | 0   | 0   | 0   | 0   | 0   | 0   | 0   | 0   | 0   |
| <b>Subchondral bone</b>                                          |                                             |     |     |     |     |     |     |     |     |     |     |     |
| increased osteoclasts                                            | +                                           | +   | 0   | 0   | 0   | 0   | 0   | 0   | 0   | 0   | 0   | 0   |
| increased osteoblasts                                            | +                                           | +   | 0   | 0   | 0   | 0   | 0   | 0   | 0   | 0   | 0   | 0   |
| increased fibrous stroma                                         | +                                           | +   | 0   | 0   | +   | +   | +   | +   | +   | +   | +   | +   |
| decreased hematopoietic tissue                                   | +                                           | +   | +   | +   | +   | +   | +   | +   | +   | +   | +   | +   |
| collapse of trabeculae                                           | +                                           | +   | +   | +   | +   | +   | +   | +   | +   | +   | +   | +   |
| bone necrosis                                                    | +                                           | +   | 0   | 0   | 0   | 0   | 0   | 0   | 0   | 0   | 0   | 0   |
| bone regeneration                                                | 0                                           | 0   | 0   | 0   | +   | +   | 0   | 0   | 0   | 0   | 0   | 0   |
| subchondral cyst                                                 | 0                                           | 0   | 0   | 0   | 0   | 0   | 0   | 0   | 0   | 0   | 0   | 0   |
| lymphocytes                                                      | 0                                           | 0   | 0   | 0   | 0   | 0   | 0   | 0   | 0   | 0   | 0   | 0   |
| macrophages                                                      | 0                                           | 0   | 0   | 0   | 0   | 0   | 0   | 0   | 0   | 0   | 0   | 0   |
| neutrophils                                                      | 0                                           | 0   | 0   | 0   | 0   | 0   | 0   | 0   | 0   | 0   | 0   | 0   |
| plasma cells                                                     | 0                                           | 0   | 0   | 0   | 0   | 0   | 0   | 0   | 0   | 0   | 0   | 0   |
| multinucleated cells                                             | 0                                           | 0   | 0   | 0   | 0   | 0   | 0   | 0   | 0   | 0   | 0   | 0   |
| <b>Articular Cartilage</b>                                       |                                             |     |     |     |     |     |     |     |     |     |     |     |
| chondrocyte necrosis                                             | +                                           | +   | +   | +   | +   | +   | +   | +   | +   | +   | +   | +   |
| erosion/fissures of articular surface                            | +                                           | +   | +   | +   | +   | +   | +   | +   | +   | +   | +   | +   |
| decreased thickness                                              | +                                           | +   | +   | +   | +   | +   | +   | +   | +   | +   | +   | +   |
| cartilage matrix degeneration                                    | +                                           | +   | +   | +   | +   | +   | +   | +   | +   | +   | +   | +   |
| clustering chondrocytes                                          | 0                                           | 0   | 0   | 0   | 0   | 0   | 0   | 0   | 0   | 0   | 0   | 0   |
| chondrocyte proliferation                                        | 0                                           | 0   | 0   | 0   | 0   | 0   | 0   | 0   | 0   | 0   | 0   | 0   |
| fibrocartilage                                                   | 0                                           | 0   | 0   | 0   | 0   | 0   | 0   | 0   | 0   | 0   | 0   | 0   |

G) Group 7. Fluocinolone treated animals (2 ug/kg) animals necropsied at day 29

| Group<br>Animal ID<br>Site                                       | 7 - Fluocinolone (2 µg/kg) - Necropsy Day 29 |     |     |     |     |     |     |     |     |     |     |     |
|------------------------------------------------------------------|----------------------------------------------|-----|-----|-----|-----|-----|-----|-----|-----|-----|-----|-----|
|                                                                  | 4                                            |     |     |     | 15  |     |     |     | 25  |     |     |     |
|                                                                  | MTP                                          | MFC | LTP | LFC | MTP | MFC | LTP | LFC | MTP | MFC | LTP | LFC |
| <b>% Area of Chondrocyte Necrosis/ proteoglycan degeneration</b> | 3                                            | 0   | 0   | 0   | 3   | 3   | 3   | 3   | 3   | 2   | 3   | 2   |
| <b>Safranin - O</b>                                              |                                              |     |     |     |     |     |     |     |     |     |     |     |
| decreased proteoglycan                                           | 2                                            | 1   | 1   | 1   | 3   | 3   | 3   | 3   | 2   | 3   | 2   | 3   |
| <b>Synovial membrane</b>                                         |                                              |     |     |     |     |     |     |     |     |     |     |     |
| fibrin/edema                                                     | 0                                            | 0   | 0   | 0   | 0   | 0   | 0   | 0   | 0   | 0   | 0   | 0   |
| lymphocytes                                                      | 0                                            | 0   | 0   | 0   | 0   | 0   | 0   | 0   | 0   | 0   | 0   | 0   |
| macrophages                                                      | 0                                            | 0   | 0   | 0   | 0   | 0   | 0   | 0   | 0   | 0   | 0   | 0   |
| neutrophils                                                      | 0                                            | 0   | 0   | 0   | 0   | 0   | 0   | 0   | 0   | 0   | 0   | 0   |
| hyperplasia                                                      | 0                                            | 0   | 0   | 0   | 0   | 0   | 0   | 0   | 0   | 0   | 0   | 0   |
| osteophytes                                                      | 0                                            | 0   | 0   | 0   | 0   | 0   | 0   | 0   | 0   | 0   | 0   | 0   |
| plasma cells                                                     | 0                                            | 0   | 0   | 0   | 0   | 0   | 0   | 0   | 0   | 0   | 0   | 0   |
| multinucleated cells                                             | 0                                            | 0   | 0   | 0   | 0   | 0   | 0   | 0   | 0   | 0   | 0   | 0   |
| <b>Subchondral bone</b>                                          |                                              |     |     |     |     |     |     |     |     |     |     |     |
| increased osteoclasts                                            | 0                                            | 0   | 0   | 0   | 0   | 0   | 0   | 0   | 0   | 0   | 0   | 0   |
| increased osteoblasts                                            | 0                                            | 0   | 0   | 0   | 0   | 0   | 0   | 0   | 0   | 0   | 0   | 0   |
| increased fibrous stroma                                         | 0                                            | 0   | 0   | 0   | +   | +   | +   | +   | 0   | 0   | 0   | 0   |
| decreased hematopoietic tissue                                   | +                                            | +   | +   | +   | +   | +   | +   | +   | +   | +   | +   | +   |
| collapse of trabeculae                                           | +                                            | +   | +   | +   | +   | +   | +   | +   | +   | +   | +   | +   |
| bone necrosis                                                    | 0                                            | 0   | 0   | 0   | 0   | 0   | 0   | 0   | 0   | 0   | 0   | 0   |
| bone regeneration                                                | +                                            | +   | +   | +   | 0   | +   | 0   | +   | 0   | 0   | 0   | 0   |
| subchondral cyst                                                 | 0                                            | 0   | 0   | 0   | 0   | 0   | 0   | 0   | 0   | 0   | 0   | 0   |
| lymphocytes                                                      | 0                                            | 0   | 0   | 0   | 0   | 0   | 0   | 0   | 0   | 0   | 0   | 0   |
| macrophages                                                      | 0                                            | 0   | 0   | 0   | 0   | 0   | 0   | 0   | 0   | 0   | 0   | 0   |
| neutrophils                                                      | 0                                            | 0   | 0   | 0   | 0   | 0   | 0   | 0   | 0   | 0   | 0   | 0   |
| plasma cells                                                     | 0                                            | 0   | 0   | 0   | 0   | 0   | 0   | 0   | 0   | 0   | 0   | 0   |
| multinucleated cells                                             | 0                                            | 0   | 0   | 0   | 0   | 0   | 0   | 0   | 0   | 0   | 0   | 0   |
| <b>Articular Cartilage</b>                                       |                                              |     |     |     |     |     |     |     |     |     |     |     |
| chondrocyte necrosis                                             | +                                            | +   | +   | +   | +   | +   | +   | +   | +   | +   | +   | +   |
| erosion/fissures of articular surface                            | 0                                            | 0   | 0   | 0   | +   | +   | +   | +   | 0   | 0   | 0   | 0   |
| decreased thickness                                              | 0                                            | 0   | 0   | 0   | 0   | 0   | 0   | 0   | 0   | 0   | 0   | 0   |
| cartilage matrix degeneration                                    | +                                            | +   | +   | +   | +   | +   | +   | +   | +   | +   | +   | +   |
| clustering chondrocytes                                          | +                                            | +   | +   | +   | +   | +   | +   | +   | +   | +   | +   | +   |
| chondrocyte proliferation                                        | +                                            | +   | +   | +   | +   | +   | +   | +   | +   | +   | +   | +   |
| fibrocartilage                                                   | 0                                            | 0   | 0   | 0   | 0   | 0   | 0   | 0   | 0   | 0   | 0   | 0   |

Moderate to severe degenerative changes were identified in all groups in both the lateral and medial femoral condyle and lateral and medial tibial plateau and in the articular cartilage and subchondral bone. The articular cartilage alterations were characterized by degeneration of matrix with loss of proteoglycans, necrosis of chondrocytes and erosion and fissures in the articular surface. The degenerative changes extended into the subchondral bone in many rats and were characterized by collapse of the trabeculae, proliferation of fibrous connective tissue and remodeling of the bone.

Alterations were scored according to the scale described in the methods. Differences among the individual rats could be broadly divided into 3 responses: 1) Rats in which the articular cartilage was present over the majority of the joint surface with focal to extensive degeneration of the matrix/necrosis of chondrocytes, 2) Rats with erosion/loss of the cartilage over the majority of the joint surfaces, with a minimal fibrous connective tissue response/collapse of trabeculae in the subchondral bone, and 3) Rats with erosion of the cartilage over the majority of the joint surfaces and with moderate fibrous connective tissue proliferation/collapse of trabeculae in the subchondral bone. In the first group, rats with articular cartilage present over the majority of the joint surface, the articular cartilage was pale and eosinophilic with few chondrocytes. The chondrocytes were mostly necrotic, i.e., exhibiting cartilage necrosis and degeneration. The thickness of the degenerate articular cartilage varied from near normal thickness to markedly thin. The subchondral bone had variable collapse of trabeculae and minimal fibrous connective tissue, osteoblasts and osteoclasts. In the second group, rats with almost no articular cartilage and exposed subchondral bone, there were some rats with minimal collapse of the underlying trabecular bone, accompanied by increased minimal increased fibrous connective tissue in the marrow adjacent to the articular surface. In the third group, there was marked collapse of the trabeculae, moderately decreased

hemopoietic tissue, increased fibrous connective tissue with abundant osteoclasts and osteoblasts lining the trabeculae.

In addition to the changes described above, some individual rats had necrosis of osteoid or regeneration of cartilage at the edge of the articular surface. Inflammatory cells (lymphocytes, macrophages, plasma cells, neutrophils) were not observed in either the bone or the soft tissues, and no changes were seen in the synovial membrane. The untreated control group, the 14, 21, and 29 day vehicle control groups, and the clonidine group were considered to be similarly affected, with the majority of sites scoring 4 or 5 based on the scale of percentage of area of articular degeneration/necrosis. The exception was rat #29 in the 21 day vehicle control group. In this rat, the femoral condyles and tibial plateaus were less severely affected than other rats: the cartilage degeneration was less extensive and there was minimal degeneration or remodeling of the subchondral bone. The articular cartilage also had some evidence of regeneration – clustering of chondrocytes, with focal invagination of the cartilage into the subchondral bone. The 7 day vehicle control group had severe degenerative changes but had greater numbers of necrotic chondrocytes and preservation of the architecture in necrotic articular cartilage, with minimal fibrous connective tissue response in the subchondral bone. The Fluocinolone group was considered the least severely affected, with overall lower scores on the percentage area of degenerative cartilage. Further, the rats in this group had minimal proliferation of fibrous connective tissue/ collapse of the trabeculae/subchondral bone remodeling.

### **Conclusions:**

In this first trial of MIA treatment, moderate to severe degenerative changes were identified in all but the Fluocinolone group in both the lateral and medial femoral condyle and lateral and medial tibial plateau, in the articular cartilage, and in the subchondral bone. The articular cartilage alterations were characterized by degeneration of matrix, loss of proteoglycans, necrosis of chondrocytes and erosion of the articular surface. The degenerative changes extended into the subchondral bone in many rats, most notable in the untreated controls, 14-29 day groups, and the clonidine group: characterized by collapse of the trabeculae, proliferation of fibrous connective tissue and remodeling of the bone. Thus extension of degenerative changes into the sub-chondral bone was associated with time points of 14 days or greater, and was not observed at 7 days.

The vehicle alone and Clonidine (100 ug/kg) group were not significantly different from the rats that received no treatment. The group treated with Fluocinolone (2µg/kg) had moderate degenerative changes characterized by moderately extensive degeneration of the articular cartilage and minimal alterations in the subchondral bone. This group was less severely affected than other treatment groups.

## **MIA Trial 2: Histopathology**

### **Semi-quantitative Analysis of Histological Sections MIA Trial 2**

A comprehensive histopathological analysis was completed in Trial 2 with four animals from each group (below). The added detail provided in Figures 54-65 shows that some agents had significant effects on proteoglycan and matrix loss in specific regions but such significance may have been lost with calculation of the total joint score. For example, animals treated with fluocinolone (Tables 16 & 17; 0.01 mg/ml- a slightly lower concentration than was used in the previous study) showed a significant inhibition of the loss of cartilaginous matrix and bone resorption in both the medial tibial plateau and the medial femoral condyle and yet did not show a significant change in total joint scores. Significant t values are highlighted in red. Note also that in some cases the results trended toward improvement but were variable enough not to be significant.

## 1) Vehicle Control (Saline)

**Table 8.** Histopathological analysis of proteoglycan and matrix loss in Vehicle Controls in MIA Trial 2.

| Group 1<br>Vehicle (saline) | MIP          |            |            |            | MFC        |            |            |            | LTP        |            |            |            | LFC        |            |            |            |
|-----------------------------|--------------|------------|------------|------------|------------|------------|------------|------------|------------|------------|------------|------------|------------|------------|------------|------------|
|                             | % loss of    |            |            |            | % loss of  |            |            |            | % loss of  |            |            |            | % loss of  |            |            |            |
|                             | Cell         | PG         | Matrix     | Mean       | Cell       | PG         | Matrix     | Mean       | Cell       | PG         | Matrix     | Mean       | Cell       | PG         | Matrix     | Mean       |
| 9                           | 100%         | 99%        | 80%        | 93%        | 100%       | 99%        | 70%        | 90%        | 100%       | 99%        | 80%        | 93%        | 100%       | 99%        | 70%        | 90%        |
| 14                          | 100%         | 99%        | 70%        | 90%        | 100%       | 99%        | 50%        | 83%        | 100%       | 99%        | 80%        | 93%        | 100%       | 99%        | 80%        | 93%        |
| 19                          | 100%         | 99%        | 80%        | 93%        | 90%        | 85%        | 50%        | 75%        | 100%       | 99%        | 80%        | 93%        | 100%       | 100%       | 100%       | 100%       |
| 34                          | 95%          | 90%        | 5%         | 63%        | 65%        | 60%        | 5%         | 43%        | 65%        | 60%        | 30%        | 52%        | 80%        | 75%        | 30%        | 62%        |
| <b>Mean</b>                 | <b>99%</b>   | <b>97%</b> | <b>59%</b> | <b>85%</b> | <b>89%</b> | <b>86%</b> | <b>44%</b> | <b>73%</b> | <b>91%</b> | <b>89%</b> | <b>68%</b> | <b>83%</b> | <b>95%</b> | <b>93%</b> | <b>70%</b> | <b>86%</b> |
| <b>SE</b>                   | <b>#####</b> | <b>2%</b>  | <b>18%</b> | <b>7%</b>  | <b>8%</b>  | <b>9%</b>  | <b>14%</b> | <b>10%</b> | <b>9%</b>  | <b>10%</b> | <b>13%</b> | <b>10%</b> | <b>5%</b>  | <b>6%</b>  | <b>15%</b> | <b>8%</b>  |
| <b>% Inhibition</b>         | <b>0%</b>    | <b>0%</b>  | <b>0%</b>  | <b>0%</b>  | <b>0%</b>  | <b>0%</b>  | <b>0%</b>  | <b>0%</b>  | <b>0%</b>  | <b>0%</b>  | <b>0%</b>  | <b>0%</b>  | <b>0%</b>  | <b>0%</b>  | <b>0%</b>  | <b>0%</b>  |

**Table 9.** Histopathological analysis of cartilage, bone, and synovium in Vehicle Controls in MIA Trial 2.

| Group 1<br>Vehicle (saline) | Mean of All<br>Cartilage | Matrix<br>Damage<br>Score | Bone Resorption    |            |            |             |             |            | Subchondral<br>Bone Sclerosis<br>Score/Surface | Osteophyte    |                | Total Joint Score |            | Synovitis<br>Comments                                         |
|-----------------------------|--------------------------|---------------------------|--------------------|------------|------------|-------------|-------------|------------|------------------------------------------------|---------------|----------------|-------------------|------------|---------------------------------------------------------------|
|                             |                          |                           | Percent of Surface |            |            |             |             | Score      |                                                | Measure<br>µm | with<br>Matrix | w/o<br>Matrix     |            |                                                               |
|                             |                          |                           | Score              | MIP        | MFC        | LTP         | LFC         |            |                                                |               |                |                   | Mean       |                                                               |
| 9                           | 91%                      | 5                         | 5                  | 100%       | 100%       | 100%        | 100%        | 100%       | 0                                              | 5             | 1000           | 15                | 10         | Moderate fibrosis                                             |
| 14                          | 90%                      | 5                         | 5                  | 100%       | 100%       | 100%        | 100%        | 100%       | 1                                              | 5             | 1000           | 16                | 11         | Moderate fibrosis<br>with minimal<br>subacute<br>inflammation |
| 19                          | 90%                      | 5                         | 5                  | 100%       | 100%       | 100%        | 100%        | 100%       | 0                                              | 5             | 1000           | 15                | 10         | Moderate fibrosis                                             |
| 34                          | 55%                      | 3                         | 5                  | 90%        | 75%        | 100%        | 100%        | 91%        | 0                                              | 3             | 600            | 11                | 8          | Mild fibrosis                                                 |
| <b>Mean</b>                 | <b>82%</b>               | <b>4.5</b>                | <b>5.0</b>         | <b>98%</b> | <b>94%</b> | <b>100%</b> | <b>100%</b> | <b>98%</b> | <b>0.3</b>                                     | <b>4.5</b>    | <b>900.0</b>   | <b>14.3</b>       | <b>9.8</b> |                                                               |
| <b>SE</b>                   | <b>9%</b>                | <b>0.5</b>                | <b>0.0</b>         | <b>3%</b>  | <b>6%</b>  | <b>0%</b>   | <b>0%</b>   | <b>2%</b>  | <b>0.3</b>                                     | <b>0.5</b>    | <b>100.0</b>   | <b>1.1</b>        | <b>0.6</b> |                                                               |
| <b>% Inhibition</b>         | <b>0%</b>                | <b>0%</b>                 | <b>0%</b>          | <b>0%</b>  | <b>0%</b>  | <b>0%</b>   | <b>0%</b>   | <b>0%</b>  | <b>0%</b>                                      | <b>0%</b>     | <b>0%</b>      | <b>0%</b>         | <b>0%</b>  |                                                               |

## 2) Tacrolimus (0.3 mg/kg, i.p.)

**Table 10.** Histopathological analysis of proteoglycan and matrix loss in Tacrolimus-treated animals in MIA Trial 2.

| Group 2<br>Tacrolimus 0.3 | MIP          |              |              |              | MFC          |              |              |              | LTP          |              |              |              | LFC          |              |              |              |
|---------------------------|--------------|--------------|--------------|--------------|--------------|--------------|--------------|--------------|--------------|--------------|--------------|--------------|--------------|--------------|--------------|--------------|
|                           | % loss of    |              |              |              | % loss of    |              |              |              | % loss of    |              |              |              | % loss of    |              |              |              |
|                           | Cell         | PG           | Matrix       | Mean         | Cell         | PG           | Matrix       | Mean         | Cell         | PG           | Matrix       | Mean         | Cell         | PG           | Matrix       | Mean         |
| 1                         | 70%          | 65%          | 40%          | 58%          | 50%          | 45%          | 20%          | 38%          | 100%         | 99%          | 70%          | 90%          | 100%         | 99%          | 70%          | 90%          |
| 4                         | 70%          | 65%          | 5%           | 47%          | 30%          | 25%          | 5%           | 20%          | 85%          | 80%          | 5%           | 57%          | 45%          | 40%          | 0%           | 28%          |
| 7                         | 100%         | 99%          | 70%          | 90%          | 100%         | 99%          | 70%          | 90%          | 100%         | 99%          | 70%          | 90%          | 100%         | 99%          | 70%          | 90%          |
| 11                        | 100%         | 99%          | 70%          | 90%          | 70%          | 70%          | 5%           | 48%          | 100%         | 99%          | 70%          | 90%          | 100%         | 99%          | 70%          | 90%          |
| <b>Mean</b>               | <b>85%</b>   | <b>82%</b>   | <b>46%</b>   | <b>71%</b>   | <b>63%</b>   | <b>60%</b>   | <b>25%</b>   | <b>49%</b>   | <b>96%</b>   | <b>94%</b>   | <b>54%</b>   | <b>81%</b>   | <b>86%</b>   | <b>84%</b>   | <b>53%</b>   | <b>74%</b>   |
| <b>SE</b>                 | <b>0.087</b> | <b>10%</b>   | <b>15%</b>   | <b>11%</b>   | <b>15%</b>   | <b>16%</b>   | <b>15%</b>   | <b>15%</b>   | <b>4%</b>    | <b>5%</b>    | <b>16%</b>   | <b>8%</b>    | <b>14%</b>   | <b>15%</b>   | <b>18%</b>   | <b>15%</b>   |
| <b>t-test to grp 1</b>    | <b>0.167</b> | <b>0.193</b> | <b>0.618</b> | <b>0.338</b> | <b>0.175</b> | <b>0.208</b> | <b>0.399</b> | <b>0.236</b> | <b>0.618</b> | <b>0.661</b> | <b>0.527</b> | <b>0.928</b> | <b>0.572</b> | <b>0.593</b> | <b>0.473</b> | <b>0.527</b> |
| <b>% Inhibition</b>       | <b>14%</b>   | <b>15%</b>   | <b>21%</b>   | <b>16%</b>   | <b>30%</b>   | <b>30%</b>   | <b>43%</b>   | <b>33%</b>   | <b>-5%</b>   | <b>-6%</b>   | <b>20%</b>   | <b>2%</b>    | <b>9%</b>    | <b>10%</b>   | <b>25%</b>   | <b>14%</b>   |

**Table 11.** Histopathological analysis of cartilage, bone, and synovium in Tacrolimus-treated animals in MIA Trial 2.

| Group 2<br>Tacrolimus 0.3 | Mean of All Cartilage | Matrix Damage Score | Bone Resorption    |              |              |              |              |              | Subchondral Bone Sclerosis Score/Surface | Osteophyte      |              | Total Joint Score |              | Synovitis Comments |
|---------------------------|-----------------------|---------------------|--------------------|--------------|--------------|--------------|--------------|--------------|------------------------------------------|-----------------|--------------|-------------------|--------------|--------------------|
|                           |                       |                     | Percent of Surface |              |              |              |              | Score        |                                          | Measure $\mu$ m | with Matrix  | w/o Matrix        |              |                    |
|                           |                       |                     | Score              | MTP          | MFC          | LTP          | LFC          |              |                                          |                 |              |                   | Mean         |                    |
| 1                         | 69%                   | 4                   | 5                  | 100%         | 100%         | 100%         | 100%         | 100%         | 0                                        | 5               | 1000         | 14                | 10           | Moderate fibrosis  |
| 4                         | 38%                   | 2                   | 3                  | 75%          | 30%          | 50%          | 50%          | 51%          | 0                                        | 2               | 400          | 7                 | 5            | Minimal fibrosis   |
| 7                         | 90%                   | 5                   | 5                  | 100%         | 100%         | 100%         | 100%         | 100%         | 0                                        | 4               | 800          | 14                | 9            | Moderate fibrosis  |
| 11                        | 79%                   | 4                   | 4                  | 100%         | 50%          | 100%         | 100%         | 88%          | 0                                        | 3               | 600          | 11                | 7            | Mild fibrosis      |
| <b>Mean</b>               | <b>69%</b>            | <b>3.8</b>          | <b>4.3</b>         | <b>94%</b>   | <b>70%</b>   | <b>88%</b>   | <b>88%</b>   | <b>85%</b>   | <b>0.0</b>                               | <b>3.5</b>      | <b>700.0</b> | <b>11.5</b>       | <b>7.8</b>   |                    |
| <b>SE</b>                 | <b>11%</b>            | <b>0.6</b>          | <b>0.5</b>         | <b>6%</b>    | <b>18%</b>   | <b>13%</b>   | <b>13%</b>   | <b>12%</b>   | <b>0.0</b>                               | <b>0.6</b>      | <b>129.1</b> | <b>1.7</b>        | <b>1.1</b>   |                    |
| <b>t-test to grp 1</b>    | <b>0.412</b>          | <b>0.387</b>        | <b>0.168</b>       | <b>0.598</b> | <b>0.255</b> | <b>0.356</b> | <b>0.356</b> | <b>0.306</b> | <b>0.356</b>                             | <b>0.267</b>    | <b>0.267</b> | <b>0.217</b>      | <b>0.168</b> |                    |
| <b>% Inhibition</b>       | <b>15%</b>            | <b>17%</b>          | <b>15%</b>         | <b>4%</b>    | <b>25%</b>   | <b>13%</b>   | <b>13%</b>   | <b>13%</b>   | <b>100%</b>                              | <b>22%</b>      | <b>22%</b>   | <b>19%</b>        | <b>21%</b>   |                    |

**3) Tacrolimus (0.6 mg/kg, i.p.)**

**Table 12.** Histopathological analysis of proteoglycan and matrix loss in Tacrolimus-treated animals in MIA Trial 2.

| Group 3<br>Tacrolimus 0.6 | MIP          |              |              |              | MFC          |              |              |              | LTP          |              |              |              | LFC          |              |              |              |
|---------------------------|--------------|--------------|--------------|--------------|--------------|--------------|--------------|--------------|--------------|--------------|--------------|--------------|--------------|--------------|--------------|--------------|
|                           | % loss of    |              |              |              | % loss of    |              |              |              | % loss of    |              |              |              | % loss of    |              |              |              |
|                           | Cell         | PG           | Matrix       | Mean         | Cell         | PG           | Matrix       | Mean         | Cell         | PG           | Matrix       | Mean         | Cell         | PG           | Matrix       | Mean         |
| 27                        | 100%         | 99%          | 50%          | 83%          | 100%         | 99%          | 50%          | 83%          | 100%         | 99%          | 5%           | 68%          | 90%          | 85%          | 0%           | 58%          |
| 45                        | 95%          | 95%          | 30%          | 73%          | 100%         | 99%          | 5%           | 68%          | 100%         | 99%          | 70%          | 90%          | 100%         | 99%          | 80%          | 93%          |
| 51                        | 65%          | 60%          | 5%           | 43%          | 0%           | 0%           | 0%           | 0%           | 62%          | 60%          | 0%           | 41%          | 30%          | 25%          | 0%           | 18%          |
| 73                        | 90%          | 85%          | 10%          | 62%          | 90%          | 85%          | 5%           | 60%          | 100%         | 99%          | 70%          | 90%          | 90%          | 85%          | 0%           | 58%          |
| <b>Mean</b>               | <b>88%</b>   | <b>85%</b>   | <b>24%</b>   | <b>65%</b>   | <b>73%</b>   | <b>71%</b>   | <b>15%</b>   | <b>53%</b>   | <b>91%</b>   | <b>89%</b>   | <b>36%</b>   | <b>72%</b>   | <b>78%</b>   | <b>74%</b>   | <b>20%</b>   | <b>57%</b>   |
| <b>SE</b>                 | <b>0.078</b> | <b>9%</b>    | <b>10%</b>   | <b>9%</b>    | <b>24%</b>   | <b>24%</b>   | <b>12%</b>   | <b>18%</b>   | <b>9%</b>    | <b>10%</b>   | <b>20%</b>   | <b>12%</b>   | <b>16%</b>   | <b>17%</b>   | <b>20%</b>   | <b>15%</b>   |
| <b>t-test to grp 1</b>    | <b>0.203</b> | <b>0.233</b> | <b>0.143</b> | <b>0.132</b> | <b>0.550</b> | <b>0.578</b> | <b>0.163</b> | <b>0.376</b> | <b>0.956</b> | <b>1.000</b> | <b>0.226</b> | <b>0.518</b> | <b>0.337</b> | <b>0.304</b> | <b>0.091</b> | <b>0.146</b> |
| <b>% Inhibition</b>       | <b>11%</b>   | <b>12%</b>   | <b>60%</b>   | <b>23%</b>   | <b>18%</b>   | <b>17%</b>   | <b>66%</b>   | <b>27%</b>   | <b>1%</b>    | <b>0%</b>    | <b>46%</b>   | <b>13%</b>   | <b>18%</b>   | <b>21%</b>   | <b>71%</b>   | <b>34%</b>   |

**Table 13.** Histopathological analysis of cartilage, bone, and synovium in Tacrolimus-treated animals in MIA Trial 2.

| Group 3<br>Tacrolimus 0.6 | Mean of All Cartilage | Matrix Damage Score | Bone Resorption    |              |              |              |              |              | Subchondral Bone Sclerosis Score/Surface | Osteophyte      |              | Total Joint Score |              | Synovitis Comments |
|---------------------------|-----------------------|---------------------|--------------------|--------------|--------------|--------------|--------------|--------------|------------------------------------------|-----------------|--------------|-------------------|--------------|--------------------|
|                           |                       |                     | Percent of Surface |              |              |              |              | Score        |                                          | Measure $\mu$ m | with Matrix  | w/o Matrix        |              |                    |
|                           |                       |                     | Score              | MTP          | MFC          | LTP          | LFC          |              |                                          |                 |              |                   | Mean         |                    |
| 27                        | 73%                   | 4                   | 4                  | 40%          | 100%         | 30%          | 100%         | 68%          | 0                                        | 4               | 800          | 12                | 8            | Marked fibrosis    |
| 45                        | 81%                   | 5                   | 4                  | 100%         | 50%          | 100%         | 100%         | 88%          | 0                                        | 4               | 800          | 13                | 8            | Marked fibrosis    |
| 51                        | 26%                   | 2                   | 2                  | 30%          | 0%           | 50%          | 20%          | 25%          | 0                                        | 0               | 0            | 4                 | 2            | Normal synovium    |
| 73                        | 67%                   | 4                   | 5                  | 100%         | 100%         | 100%         | 100%         | 100%         | 0                                        | 3               | 600          | 12                | 8            | Moderate fibrosis  |
| <b>Mean</b>               | <b>62%</b>            | <b>3.8</b>          | <b>3.8</b>         | <b>68%</b>   | <b>63%</b>   | <b>70%</b>   | <b>80%</b>   | <b>70%</b>   | <b>0.0</b>                               | <b>2.8</b>      | <b>550.0</b> | <b>10.3</b>       | <b>6.5</b>   |                    |
| <b>SE</b>                 | <b>12%</b>            | <b>0.6</b>          | <b>0.6</b>         | <b>19%</b>   | <b>24%</b>   | <b>18%</b>   | <b>20%</b>   | <b>16%</b>   | <b>0.0</b>                               | <b>0.9</b>      | <b>189.3</b> | <b>2.1</b>        | <b>1.5</b>   |                    |
| <b>t-test to grp 1</b>    | <b>0.241</b>          | <b>0.387</b>        | <b>0.094</b>       | <b>0.166</b> | <b>0.253</b> | <b>0.143</b> | <b>0.356</b> | <b>0.144</b> | <b>0.356</b>                             | <b>0.153</b>    | <b>0.153</b> | <b>0.143</b>      | <b>0.093</b> |                    |
| <b>% Inhibition</b>       | <b>24%</b>            | <b>17%</b>          | <b>25%</b>         | <b>31%</b>   | <b>33%</b>   | <b>30%</b>   | <b>20%</b>   | <b>28%</b>   | <b>100%</b>                              | <b>39%</b>      | <b>39%</b>   | <b>28%</b>        | <b>33%</b>   |                    |

**4) Curcumin (50 mg/kg, p.o.)**

**Table 14.** Histopathological analysis of proteoglycan and matrix loss in Curcumin-treated animals in MIA Trial 2.

| Group 4<br>Curcumin 50 | MIP          |              |              |              | MFC          |              |              |              | LTP          |              |              |              | LFC          |              |              |              |
|------------------------|--------------|--------------|--------------|--------------|--------------|--------------|--------------|--------------|--------------|--------------|--------------|--------------|--------------|--------------|--------------|--------------|
|                        | % loss of    |              |              |              | % loss of    |              |              |              | % loss of    |              |              |              | % loss of    |              |              |              |
|                        | Cell         | PG           | Matrix       | Mean         | Cell         | PG           | Matrix       | Mean         | Cell         | PG           | Matrix       | Mean         | Cell         | PG           | Matrix       | Mean         |
| 5                      | 100%         | 99%          | 70%          | 90%          | 100%         | 99%          | 70%          | 90%          | 100%         | 99%          | 80%          | 93%          | 100%         | 99%          | 70%          | 90%          |
| 21                     | 100%         | 99%          | 70%          | 90%          | 100%         | 99%          | 50%          | 83%          | 100%         | 99%          | 80%          | 93%          | 100%         | 100%         | 100%         | 100%         |
| 30                     | 100%         | 99%          | 50%          | 83%          | 100%         | 99%          | 50%          | 83%          | 100%         | 99%          | 70%          | 90%          | 100%         | 99%          | 80%          | 93%          |
| 35                     | 100%         | 99%          | 30%          | 76%          | 100%         | 99%          | 50%          | 83%          | 100%         | 99%          | 80%          | 93%          | 100%         | 99%          | 80%          | 93%          |
| <b>Mean</b>            | <b>100%</b>  | <b>99%</b>   | <b>55%</b>   | <b>85%</b>   | <b>100%</b>  | <b>99%</b>   | <b>55%</b>   | <b>85%</b>   | <b>100%</b>  | <b>99%</b>   | <b>78%</b>   | <b>92%</b>   | <b>100%</b>  | <b>99%</b>   | <b>83%</b>   | <b>94%</b>   |
| <b>SE</b>              | <b>0</b>     | <b>0%</b>    | <b>10%</b>   | <b>3%</b>    | <b>0%</b>    | <b>0%</b>    | <b>5%</b>    | <b>2%</b>    | <b>0%</b>    | <b>0%</b>    | <b>3%</b>    | <b>1%</b>    | <b>0%</b>    | <b>0%</b>    | <b>6%</b>    | <b>2%</b>    |
| <b>t-test to grp 1</b> | <b>0.356</b> | <b>0.356</b> | <b>0.861</b> | <b>0.992</b> | <b>0.222</b> | <b>0.200</b> | <b>0.471</b> | <b>0.295</b> | <b>0.356</b> | <b>0.356</b> | <b>0.463</b> | <b>0.395</b> | <b>0.356</b> | <b>0.363</b> | <b>0.465</b> | <b>0.402</b> |
| <b>% Inhibition</b>    | <b>-1%</b>   | <b>-2%</b>   | <b>6%</b>    | <b>0%</b>    | <b>-13%</b>  | <b>-15%</b>  | <b>-26%</b>  | <b>-16%</b>  | <b>-10%</b>  | <b>-11%</b>  | <b>-15%</b>  | <b>-11%</b>  | <b>-5%</b>   | <b>-6%</b>   | <b>-18%</b>  | <b>-9%</b>   |



**Table 15.** Histopathological analysis of cartilage, bone, and synovium in Curcumin-treated animals in MIA Trial 2.

| Group 4<br>Curcumin 50 | Mean of All Cartilage | Matrix Damage Score | Bone Resorption |                    |       |       |       |       | Subchondral Bone Sclerosis Score/Surface | Osteophyte      |             | Total Joint Score |       | Synovitis Comments |
|------------------------|-----------------------|---------------------|-----------------|--------------------|-------|-------|-------|-------|------------------------------------------|-----------------|-------------|-------------------|-------|--------------------|
|                        |                       |                     | Score           | Percent of Surface |       |       |       | Score |                                          | Measure $\mu$ m | with Matrix | w/o Matrix        |       |                    |
|                        |                       |                     |                 | MIP                | MFC   | LTP   | LFC   | Mean  |                                          |                 |             |                   |       |                    |
| 5                      | 91%                   | 5                   | 5               | 100%               | 100%  | 100%  | 100%  | 100%  | 0                                        | 5               | 1000        | 15                | 10    | Moderate fibrosis  |
| 21                     | 91%                   | 5                   | 5               | 100%               | 100%  | 100%  | 100%  | 100%  | 0                                        | 5               | 1000        | 15                | 10    | Moderate fibrosis  |
| 30                     | 87%                   | 5                   | 4               | 60%                | 50%   | 100%  | 100%  | 78%   | 0                                        | 5               | 1200        | 14                | 9     | Moderate fibrosis  |
| 35                     | 86%                   | 5                   | 5               | 100%               | 100%  | 100%  | 100%  | 100%  | 0                                        | 4               | 800         | 14                | 9     | Moderate fibrosis  |
| Mean                   | 89%                   | 5.0                 | 4.8             | 90%                | 88%   | 100%  | 100%  | 94%   | 0.0                                      | 4.8             | 1000.0      | 14.5              | 9.5   |                    |
| SE                     | 1%                    | 0.0                 | 0.3             | 10%                | 13%   | 0%    | 0%    | 6%    | 0.0                                      | 0.3             | 81.6        | 0.3               | 0.3   |                    |
| t-test to grp 1        | 0.446                 | 0.356               | 0.356           | 0.494              | 0.670 | ##### | ##### | 0.590 | 0.356                                    | 0.670           | 0.468       | 0.834             | 0.730 |                    |
| % Inhibition           | -9%                   | -11%                | 5%              | 8%                 | 7%    | 0%    | 0%    | 4%    | 100%                                     | -6%             | -11%        | -2%               | 3%    |                    |

**5) Fluocinolone (0.01 mg/kg, s.c.)**

**Table 16.** Histopathological analysis of proteoglycan and matrix loss in Fluocinolone-treated animals in MIA Trial 2.

| Group 5<br>Fluocinolone 0.01 | MIP       |       |        |       | MFC       |       |        |       | LTP       |       |        |       | LFC       |       |        |       |
|------------------------------|-----------|-------|--------|-------|-----------|-------|--------|-------|-----------|-------|--------|-------|-----------|-------|--------|-------|
|                              | % loss of |       |        |       | % loss of |       |        |       | % loss of |       |        |       | % loss of |       |        |       |
|                              | Cell      | PG    | Matrix | Mean  | Cell      | PG    | Matrix | Mean  | Cell      | PG    | Matrix | Mean  | Cell      | PG    | Matrix | Mean  |
| 3                            | 40%       | 35%   | 0%     | 25%   | 0%        | 0%    | 0%     | 0%    | 50%       | 45%   | 0%     | 32%   | 0%        | 0%    | 0%     | 0%    |
| 46                           | 100%      | 99%   | 20%    | 73%   | 100%      | 99%   | 5%     | 68%   | 100%      | 99%   | 60%    | 86%   | 100%      | 99%   | 70%    | 90%   |
| 48                           | 100%      | 99%   | 5%     | 68%   | 95%       | 90%   | 5%     | 63%   | 95%       | 90%   | 50%    | 78%   | 95%       | 90%   | 50%    | 78%   |
| 65                           | 100%      | 99%   | 10%    | 70%   | 95%       | 90%   | 5%     | 63%   | 100%      | 99%   | 40%    | 80%   | 99%       | 95%   | 50%    | 81%   |
| Mean                         | 85%       | 83%   | 9%     | 59%   | 73%       | 70%   | 4%     | 49%   | 86%       | 83%   | 38%    | 69%   | 74%       | 71%   | 43%    | 62%   |
| SE                           | 0.15      | 16%   | 4%     | 11%   | 24%       | 23%   | 1%     | 16%   | 12%       | 13%   | 13%    | 13%   | 25%       | 24%   | 15%    | 21%   |
| t-test to grp 1              | 0.396     | 0.427 | 0.036  | 0.103 | 0.548     | 0.547 | 0.027  | 0.257 | 0.750     | 0.724 | 0.149  | 0.433 | 0.423     | 0.399 | 0.238  | 0.333 |
| % Inhibition                 | 14%       | 14%   | 85%    | 30%   | 18%       | 19%   | 91%    | 33%   | 5%        | 7%    | 44%    | 17%   | 23%       | 24%   | 39%    | 28%   |

**Table 17.** Histopathological analysis of cartilage, bone, and synovium in Fluocinolone-treated animals in MIA Trial 2.

| Group 5<br>Fluocinolone 0.01 | Mean of All Cartilage | Matrix Damage Score | Bone Resorption |                    |       |       |       |       | Subchondral Bone Sclerosis Score/Surface | Osteophyte      |             | Total Joint Score |       | Synovitis Comments                                  |
|------------------------------|-----------------------|---------------------|-----------------|--------------------|-------|-------|-------|-------|------------------------------------------|-----------------|-------------|-------------------|-------|-----------------------------------------------------|
|                              |                       |                     | Score           | Percent of Surface |       |       |       | Score |                                          | Measure $\mu$ m | with Matrix | w/o Matrix        |       |                                                     |
|                              |                       |                     |                 | MIP                | MFC   | LTP   | LFC   | Mean  |                                          |                 |             |                   |       |                                                     |
| 3                            | 14%                   | 1                   | 1               | 15%                | 0%    | 5%    | 0%    | 5%    | 0                                        | 0               | 0           | 2                 | 1     | Calcified cartilage retention GP<br>Normal synovium |
| 46                           | 79%                   | 4                   | 3               | 15%                | 20%   | 75%   | 100%  | 53%   | 0                                        | 3               | 600         | 10                | 6     | Mild fibrosis                                       |
| 48                           | 72%                   | 4                   | 4               | 90%                | 50%   | 70%   | 60%   | 68%   | 0                                        | 4               | 800         | 12                | 8     | Calcified cartilage retention GP<br>Mild fibrosis   |
| 65                           | 74%                   | 4                   | 4               | 60%                | 80%   | 80%   | 100%  | 80%   | 0                                        | 5               | 1000        | 13                | 9     | Calcified cartilage retention GP<br>Mild fibrosis   |
| Mean                         | 60%                   | 3.3                 | 3.0             | 45%                | 38%   | 58%   | 65%   | 51%   | 0.0                                      | 3.0             | 600.0       | 9.3               | 6.0   |                                                     |
| SE                           | 15%                   | 0.8                 | 0.7             | 18%                | 18%   | 18%   | 24%   | 16%   | 0.0                                      | 1.1             | 216.0       | 2.5               | 1.8   |                                                     |
| t-test to grp 1              | 0.262                 | 0.215               | 0.030           | 0.030              | 0.023 | 0.052 | 0.189 | 0.031 | 0.356                                    | 0.254           | 0.254       | 0.117             | 0.094 |                                                     |
| % Inhibition                 | 27%                   | 28%                 | 40%             | 54%                | 60%   | 43%   | 35%   | 48%   | 100%                                     | 33%             | 33%         | 35%               | 38%   |                                                     |

## 6) Clonidine (0.1 mg/kg, s.c.)

**Table 18.** Histopathological analysis of proteoglycan and matrix loss in Clonidine-treated animals in MIA Trial 2.

| Group 6<br>Clonidine 0.1 | MIP          |              |              |              | MFC          |              |              |              | LTP          |              |              |              | LFC          |              |              |              |
|--------------------------|--------------|--------------|--------------|--------------|--------------|--------------|--------------|--------------|--------------|--------------|--------------|--------------|--------------|--------------|--------------|--------------|
|                          | % loss of    |              |              |              | % loss of    |              |              |              | % loss of    |              |              |              | % loss of    |              |              |              |
|                          | Cell         | PG           | Matrix       | Mean         | Cell         | PG           | Matrix       | Mean         | Cell         | PG           | Matrix       | Mean         | Cell         | PG           | Matrix       | Mean         |
| 8                        | 100%         | 99%          | 20%          | 73%          | 100%         | 99%          | 70%          | 90%          | 90%          | 85%          | 0%           | 58%          | 100%         | 99%          | 50%          | 83%          |
| 26                       | 80%          | 75%          | 5%           | 53%          | 50%          | 45%          | 20%          | 38%          | 65%          | 60%          | 30%          | 52%          | 60%          | 55%          | 10%          | 42%          |
| 40                       | 95%          | 90%          | 10%          | 65%          | 95%          | 90%          | 50%          | 78%          | 100%         | 99%          | 70%          | 90%          | 100%         | 99%          | 50%          | 83%          |
| <b>Mean</b>              | <b>92%</b>   | <b>88%</b>   | <b>12%</b>   | <b>64%</b>   | <b>82%</b>   | <b>78%</b>   | <b>47%</b>   | <b>69%</b>   | <b>85%</b>   | <b>81%</b>   | <b>33%</b>   | <b>67%</b>   | <b>87%</b>   | <b>84%</b>   | <b>37%</b>   | <b>69%</b>   |
| <b>SE</b>                | <b>0.06</b>  | <b>7%</b>    | <b>4%</b>    | <b>6%</b>    | <b>16%</b>   | <b>17%</b>   | <b>15%</b>   | <b>16%</b>   | <b>10%</b>   | <b>11%</b>   | <b>20%</b>   | <b>12%</b>   | <b>13%</b>   | <b>15%</b>   | <b>13%</b>   | <b>14%</b>   |
| <b>t-test to grp 1</b>   | <b>0.234</b> | <b>0.232</b> | <b>0.082</b> | <b>0.084</b> | <b>0.686</b> | <b>0.680</b> | <b>0.891</b> | <b>0.832</b> | <b>0.663</b> | <b>0.620</b> | <b>0.189</b> | <b>0.351</b> | <b>0.538</b> | <b>0.558</b> | <b>0.168</b> | <b>0.319</b> |
| <b>% Inhibition</b>      | <b>7%</b>    | <b>9%</b>    | <b>80%</b>   | <b>25%</b>   | <b>8%</b>    | <b>9%</b>    | <b>-7%</b>   | <b>5%</b>    | <b>7%</b>    | <b>9%</b>    | <b>51%</b>   | <b>19%</b>   | <b>9%</b>    | <b>10%</b>   | <b>48%</b>   | <b>20%</b>   |

**Table 19.** Histopathological analysis of cartilage, bone, and synovium in Clonidine-treated animals in MIA Trial 2

| Group 6<br>Clonidine 0.1 | Mean of All Cartilage | Matrix Damage Score | Bone Resorption    |              |              |              |              |              | Subchondral Bone Sclerosis Score/Surface | Osteophyte   |              | Total Joint Score |              | Synovitis Comments                                             |
|--------------------------|-----------------------|---------------------|--------------------|--------------|--------------|--------------|--------------|--------------|------------------------------------------|--------------|--------------|-------------------|--------------|----------------------------------------------------------------|
|                          |                       |                     | Percent of Surface |              |              |              |              | Mean         |                                          | Measure      | with Matrix  | w/o Matrix        |              |                                                                |
|                          |                       |                     | Score              | MIP          | MFC          | LTP          | LFC          |              |                                          |              |              |                   |              |                                                                |
| 8                        | 76%                   | 4                   | 3                  | 50%          | 50%          | 0%           | 100%         | 50%          | 1                                        | 5            | 1200         | 13                | 9            | Marked fibrosis                                                |
| 26                       | 46%                   | 3                   | 3                  | 70%          | 40%          | 60%          | 60%          | 58%          | 0                                        | 4            | 800          | 10                | 7            | Calcified cartilage retention GP, medial only<br>Mild fibrosis |
| 40                       | 79%                   | 4                   | 5                  | 100%         | 100%         | 100%         | 100%         | 100%         | 0                                        | 3            | 600          | 12                | 8            | Moderate fibrosis                                              |
| <b>Mean</b>              | <b>67%</b>            | <b>3.7</b>          | <b>3.7</b>         | <b>73%</b>   | <b>63%</b>   | <b>53%</b>   | <b>87%</b>   | <b>69%</b>   | <b>0.3</b>                               | <b>4.0</b>   | <b>866.7</b> | <b>11.7</b>       | <b>8.0</b>   |                                                                |
| <b>SE</b>                | <b>10%</b>            | <b>0.3</b>          | <b>0.7</b>         | <b>15%</b>   | <b>19%</b>   | <b>29%</b>   | <b>13%</b>   | <b>16%</b>   | <b>0.3</b>                               | <b>0.6</b>   | <b>176.4</b> | <b>0.9</b>        | <b>0.6</b>   |                                                                |
| <b>t-test to grp 1</b>   | <b>0.337</b>          | <b>0.259</b>        | <b>0.062</b>       | <b>0.111</b> | <b>0.137</b> | <b>0.113</b> | <b>0.286</b> | <b>0.083</b> | <b>0.846</b>                             | <b>0.542</b> | <b>0.867</b> | <b>0.147</b>      | <b>0.106</b> |                                                                |
| <b>% Inhibition</b>      | <b>18%</b>            | <b>19%</b>          | <b>27%</b>         | <b>25%</b>   | <b>32%</b>   | <b>47%</b>   | <b>13%</b>   | <b>29%</b>   | <b>-33%</b>                              | <b>11%</b>   | <b>4%</b>    | <b>18%</b>        | <b>18%</b>   |                                                                |

## MIA Trial 3: Histopathology

### Semi-quantitative Analysis of Histological Sections for MIA Trial 3

Histopathological analysis was completed by Bolder BioPATH for Trial 3 with three animals from each group treated with MIA (Figures 66-81 below). Intra-articular injection of saline alone was the vehicle control.

#### 1) Vehicle Control (Saline, i.a.)

**Table 20.** Histopathological analysis of proteoglycan and matrix loss in MIA Trial 3 IA Vehicle Controls.

| Group 1<br>Vehicle | MTP          |              |              |              | MFC          |              |              |              | LTP          |              |              |              | LFC          |              |              |              |
|--------------------|--------------|--------------|--------------|--------------|--------------|--------------|--------------|--------------|--------------|--------------|--------------|--------------|--------------|--------------|--------------|--------------|
|                    | % loss of    |              |              |              | % loss of    |              |              |              | % loss of    |              |              |              | % loss of    |              |              |              |
|                    | Cell         | PG           | Matrix       | Mean         | Cell         | PG           | Matrix       | Mean         | Cell         | PG           | Matrix       | Mean         | Cell         | PG           | Matrix       | Mean         |
| 3                  | 100          | 100          | 50           | 83.333       | 100          | 100          | 50           | 83.333       | 100          | 100          | 50           | 83.333       | 100          | 100          | 50           | 83.333       |
| 15                 | 0            | 0            | 0            | 0            | 0            | 0            | 0            | 0            | 0            | 0            | 0            | 0            | 0            | 0            | 0            | 0            |
| 27                 | 100          | 75           | 10           | 61.667       | 90           | 75           | 10           | 58.333       | 75           | 50           | 5            | 43.333       | 5            | 5            | 0            | 3.3333       |
| <b>Mean</b>        | <b>66.7</b>  | <b>58.3</b>  | <b>20.0</b>  | <b>48.3</b>  | <b>63.3</b>  | <b>58.3</b>  | <b>20.0</b>  | <b>47.2</b>  | <b>58.3</b>  | <b>50.0</b>  | <b>18.3</b>  | <b>42.2</b>  | <b>35.0</b>  | <b>35.0</b>  | <b>16.7</b>  | <b>28.9</b>  |
| <b>SE</b>          | <b>33.3</b>  | <b>30.0</b>  | <b>15.3</b>  | <b>25.0</b>  | <b>31.8</b>  | <b>30.0</b>  | <b>15.3</b>  | <b>24.7</b>  | <b>30.0</b>  | <b>28.9</b>  | <b>15.9</b>  | <b>24.1</b>  | <b>32.5</b>  | <b>32.5</b>  | <b>16.7</b>  | <b>27.2</b>  |
| <b>%</b>           | <b>0%</b>    | <b>0%</b>    | <b>0%</b>    | <b>0%</b>    | <b>0%</b>    | <b>0%</b>    | <b>0%</b>    | <b>0%</b>    | <b>0%</b>    | <b>0%</b>    | <b>0%</b>    | <b>0%</b>    | <b>0%</b>    | <b>0%</b>    | <b>0%</b>    | <b>0%</b>    |
| <b>t-test</b>      | <b>1.000</b> | <b>1.000</b> | <b>1.000</b> | <b>1.000</b> | <b>1.000</b> | <b>1.000</b> | <b>1.000</b> | <b>1.000</b> | <b>1.000</b> | <b>1.000</b> | <b>1.000</b> | <b>1.000</b> | <b>1.000</b> | <b>1.000</b> | <b>1.000</b> | <b>1.000</b> |

**Table 21.** Histopathological analysis of cartilage, bone, and synovium in MIA Trial 3 IA Vehicle Controls

| Group 1<br>Vehicle | Mean of<br>All<br>Cartilage | Matrix<br>Damage<br>Score | Bone Resorption |         |       |       |       |       | Subchond<br>Bone<br>Sclerosis | Osteophyte<br>Measure<br>µm | Total Joint Score |               | Synovitis |                  |
|--------------------|-----------------------------|---------------------------|-----------------|---------|-------|-------|-------|-------|-------------------------------|-----------------------------|-------------------|---------------|-----------|------------------|
|                    |                             |                           | Score           | Percent |       |       |       | Mean  |                               |                             | with<br>Matrix    | w/o<br>Matrix |           |                  |
|                    |                             |                           |                 | MTP     | MFC   | LTP   | LFC   |       |                               |                             |                   |               |           |                  |
| 3                  | 83.3                        | 5                         | 4               | 75%     | 70%   | 90%   | 100%  | 84%   | 0                             | 4                           | 880<br>(MFC)      | 13            | 8         | Mild subacute    |
| 15                 | 0.0                         | 0                         | 0               | 0%      | 0%    | 0%    | 0%    | 0%    | 0                             | 0                           | 0                 | 0             | 0         | Minimal subacute |
| 27                 | 41.7                        | 3                         | 1               | 10%     | 5%    | 25%   | 0%    | 10%   | 0                             | 0                           | 0                 | 4             | 1         | Mild subacute    |
| <b>Mean</b>        | 41.7                        | 2.7                       | 1.7             | 28%     | 25%   | 38%   | 33%   | 31%   | 0.0                           | 1.3                         | 293.3             | 5.7           | 3.0       |                  |
| <b>SE</b>          | 24.1                        | 1.5                       | 1.2             | 0.2     | 0.2   | 0.3   | 0.3   | 26%   | 0.0                           | 1.3                         | 293.3             | 3.8           | 2.5       |                  |
| <b>%</b>           | 0%                          | 0%                        | 0%              | 0%      | 0%    | 0%    | 0%    | 0%    | #DIV/0!                       | 0%                          | 0%                | 0%            | 0%        |                  |
| <b>t-test</b>      | 1.000                       | 1.000                     | 1.000           | 1.000   | 1.000 | 1.000 | 1.000 | 1.000 | #DIV/0!                       | 1.000                       | 1.000             | 1.000         | 1.000     |                  |

## 2) IA Clonidine (4.5 µg)

Animals treated with intra-articular Clonidine (4.5 ug) were not significantly different from the vehicle controls. Lesion severity was increased compared to the vehicle controls, with a total joint score of 8.7. All animals had minimal to mild subacute synovitis.

**Table 22.** Histopathological analysis of proteoglycan and matrix loss in MIA Trial 3 IA Clonidine-treated animals.

| Group 2<br>Cmpd A | MTP       |       |        |        | MFC       |       |        |        | LTP       |       |        |       | LFC       |       |        |       |
|-------------------|-----------|-------|--------|--------|-----------|-------|--------|--------|-----------|-------|--------|-------|-----------|-------|--------|-------|
|                   | % loss of |       |        |        | % loss of |       |        |        | % loss of |       |        |       | % loss of |       |        |       |
|                   | Cell      | PG    | Matrix | Mean   | Cell      | PG    | Matrix | Mean   | Cell      | PG    | Matrix | Mean  | Cell      | PG    | Matrix | Mean  |
| 8                 | 60        | 40    | 10     | 36.667 | 0         | 0     | 0      | 0      | 0         | 0     | 0      | 0     | 0         | 0     | 0      | 0     |
| 10                | 100       | 100   | 25     | 75     | 100       | 100   | 25     | 75     | 100       | 75    | 5      | 60    | 90        | 75    | 0      | 55    |
| 20                | 100       | 100   | 10     | 70     | 100       | 90    | 10     | 66.667 | 100       | 75    | 20     | 65    | 100       | 100   | 10     | 70    |
| <b>Mean</b>       | 86.7      | 80.0  | 15.0   | 60.6   | 66.7      | 63.3  | 11.7   | 47.2   | 66.7      | 50.0  | 8.3    | 41.7  | 63.3      | 58.3  | 3.3    | 41.7  |
| <b>SE</b>         | 13.3      | 20.0  | 5.0    | 12.0   | 33.3      | 31.8  | 7.3    | 23.7   | 33.3      | 25.0  | 6.0    | 20.9  | 31.8      | 30.0  | 3.3    | 21.3  |
| <b>%</b>          | -30%      | -37%  | 25%    | -25%   | -5%       | -9%   | 42%    | 0%     | -14%      | 0%    | 55%    | 1%    | -81%      | -67%  | 80%    | -44%  |
| <b>t-test</b>     | 0.607     | 0.581 | 0.771  | 0.682  | 0.946     | 0.915 | 0.648  | 1.000  | 0.862     | 1.000 | 0.588  | 0.987 | 0.567     | 0.626 | 0.477  | 0.730 |

**Table 23.** Histopathological analysis of cartilage, bone and synovium in MIA Trial 3 IA Clonidine-treated animals.

| Group 2<br>Cmpd A | Mean of<br>All<br>Cartilage | Matrix<br>Damage<br>Score | Bone Resorption |              |              |              |              |              | Subchond<br>Bone<br>Sclerosis | Osteophyte<br>Measure<br>µm | Total Joint Score |               | Synovitis    |                  |
|-------------------|-----------------------------|---------------------------|-----------------|--------------|--------------|--------------|--------------|--------------|-------------------------------|-----------------------------|-------------------|---------------|--------------|------------------|
|                   |                             |                           | Score           | Percent      |              |              |              | Mean         |                               |                             | with<br>Matrix    | w/o<br>Matrix |              |                  |
|                   |                             |                           |                 | MTP          | MFC          | LTP          | LFC          |              |                               |                             |                   |               |              |                  |
| 8                 | 9.2                         | 1                         | 1               | 40%          | 0%           | 0%           | 0%           | 10%          | 0                             | 0                           | 0                 | 2             | 1            | Minimal subacute |
| 10                | 66.3                        | 4                         | 4               | 70%          | 90%          | 92%          | 67%          | 80%          | 0                             | 4                           | 880<br>(MTP)      | 12            | 8            | Mild subacute    |
| 20                | 67.9                        | 4                         | 4               | 85%          | 50%          | 92%          | 85%          | 78%          | 0                             | 4                           | 800<br>(MTP)      | 12            | 8            | Mild subacute    |
| <b>Mean</b>       | <b>47.8</b>                 | <b>3.0</b>                | <b>3.0</b>      | <b>65%</b>   | <b>47%</b>   | <b>61%</b>   | <b>51%</b>   | <b>56%</b>   | <b>0.0</b>                    | <b>2.7</b>                  | <b>560.0</b>      | <b>8.7</b>    | <b>5.7</b>   |                  |
| <b>SE</b>         | <b>19.3</b>                 | <b>1.0</b>                | <b>1.0</b>      | <b>0.1</b>   | <b>0.3</b>   | <b>0.3</b>   | <b>0.3</b>   | <b>23%</b>   | <b>0.0</b>                    | <b>1.3</b>                  | <b>281.0</b>      | <b>3.3</b>    | <b>2.3</b>   |                  |
| <b>%</b>          | <b>-15%</b>                 | <b>-13%</b>               | <b>-80%</b>     | <b>-129%</b> | <b>-87%</b>  | <b>-60%</b>  | <b>-52%</b>  | <b>-79%</b>  | <b>#DIV/0!</b>                | <b>-100%</b>                | <b>-91%</b>       | <b>-53%</b>   | <b>-89%</b>  |                  |
| <b>t-test</b>     | <b>0.853</b>                | <b>0.859</b>              | <b>0.442</b>    | <b>0.246</b> | <b>0.563</b> | <b>0.603</b> | <b>0.702</b> | <b>0.520</b> | <b>#DIV/0!</b>                | <b>0.519</b>                | <b>0.547</b>      | <b>0.587</b>  | <b>0.481</b> |                  |

### 3) IA Tacrolimus (30 ng)

Animals treated with intra-articular Tacrolimus (30 ng) had significantly increased matrix loss in the MTP and LTP. Bone resorption was also significantly increased in the MTP and MFC, which resulted in a significant increase in the overall bone resorption score. All animals had subacute synovitis (mild to marked) with fibrosis. Significant t values are highlighted in red.

**Table 24.** Histopathological analysis of proteoglycan and matrix in MIA Trial 3 IA Tacrolimus-treated animals.

| Group 3<br>Cmpd B | MTP          |              |              |              | MFC          |              |              |              | LTP          |              |              |              | LFC          |              |              |              |
|-------------------|--------------|--------------|--------------|--------------|--------------|--------------|--------------|--------------|--------------|--------------|--------------|--------------|--------------|--------------|--------------|--------------|
|                   | % loss of    |              |              | Mean         | % loss of    |              |              | Mean         | % loss of    |              |              | Mean         | % loss of    |              |              | Mean         |
|                   | Cell         | PG           | Matrix       |              | Cell         | PG           | Matrix       |              | Cell         | PG           | Matrix       |              | Cell         | PG           | Matrix       |              |
| 13                | 100          | 100          | 75           | 91.667       | 100          | 100          | 50           | 83.333       | 100          | 100          | 75           | 91.667       | 100          | 100          | 100          | 100          |
| 17                | 100          | 100          | 100          | 100          | 100          | 100          | 100          | 100          | 100          | 100          | 100          | 100          | 100          | 100          | 100          | 100          |
| 23                | 100          | 100          | 90           | 96.667       | 100          | 100          | 25           | 75           | 100          | 100          | 75           | 91.667       | 100          | 100          | 40           | 80           |
| <b>Mean</b>       | <b>100.0</b> | <b>100.0</b> | <b>88.3</b>  | <b>96.1</b>  | <b>100.0</b> | <b>100.0</b> | <b>58.3</b>  | <b>86.1</b>  | <b>100.0</b> | <b>100.0</b> | <b>83.3</b>  | <b>94.4</b>  | <b>100.0</b> | <b>100.0</b> | <b>80.0</b>  | <b>93.3</b>  |
| <b>SE</b>         | <b>0.0</b>   | <b>0.0</b>   | <b>7.3</b>   | <b>2.4</b>   | <b>0.0</b>   | <b>0.0</b>   | <b>22.0</b>  | <b>7.3</b>   | <b>0.0</b>   | <b>0.0</b>   | <b>8.3</b>   | <b>2.8</b>   | <b>0.0</b>   | <b>0.0</b>   | <b>20.0</b>  | <b>6.7</b>   |
| <b>%</b>          | <b>-50%</b>  | <b>-71%</b>  | <b>-342%</b> | <b>-99%</b>  | <b>-58%</b>  | <b>-71%</b>  | <b>-192%</b> | <b>-82%</b>  | <b>-71%</b>  | <b>-100%</b> | <b>-355%</b> | <b>-124%</b> | <b>-186%</b> | <b>-186%</b> | <b>-380%</b> | <b>-223%</b> |
| <b>t-test</b>     | <b>0.374</b> | <b>0.238</b> | <b>0.016</b> | <b>0.129</b> | <b>0.313</b> | <b>0.238</b> | <b>0.226</b> | <b>0.206</b> | <b>0.238</b> | <b>0.158</b> | <b>0.022</b> | <b>0.097</b> | <b>0.116</b> | <b>0.116</b> | <b>0.072</b> | <b>0.083</b> |

**Table 25.** Histopathology of cartilage, bone and synovium in MIA Trial 3 IA Tacrolimus-treated animals.

| Group 3<br>Cmpd B | Mean of<br>All<br>Cartilage | Matrix<br>Damage<br>Score | Bone Resorption |              |              |              |              |              | Subchond<br>Bone<br>Sclerosis | Osteophyte<br>Measure<br>µm | Total Joint Score |                | Synovitis    |                                  |
|-------------------|-----------------------------|---------------------------|-----------------|--------------|--------------|--------------|--------------|--------------|-------------------------------|-----------------------------|-------------------|----------------|--------------|----------------------------------|
|                   |                             |                           | Score           | Percent      |              |              |              | Mean         |                               |                             | with<br>Matrix    | w/ o<br>Matrix |              |                                  |
|                   |                             |                           |                 | MTP          | MFC          | LTP          | LFC          |              |                               |                             |                   |                |              |                                  |
| 13                | 91.7                        | 5                         | 5               | 100%         | 100%         | 100%         | 100%         | 100%         | 0                             | 5                           | 1000<br>(MFC)     | 15             | 10           | Marked subacute<br>with fibrosis |
| 17                | 100.0                       | 5                         | 5               | 100%         | 100%         | 100%         | 100%         | 100%         | 0                             | 0                           | 0                 | 10             | 5            | Mild subacute<br>with fibrosis   |
| 23                | 85.8                        | 5                         | 5               | 100%         | 100%         | 100%         | 100%         | 100%         | 0                             | 5                           | 1000<br>(MTP)     | 15             | 10           | Mild subacute<br>with fibrosis   |
| <b>Mean</b>       | <b>92.5</b>                 | <b>5.0</b>                | <b>5.0</b>      | <b>100%</b>  | <b>100%</b>  | <b>100%</b>  | <b>100%</b>  | <b>100%</b>  | <b>0.0</b>                    | <b>3.3</b>                  | <b>666.7</b>      | <b>13.3</b>    | <b>8.3</b>   |                                  |
| <b>SE</b>         | <b>4.1</b>                  | <b>0.0</b>                | <b>0.0</b>      | <b>0.0</b>   | <b>0.0</b>   | <b>0.0</b>   | <b>0.0</b>   | <b>0%</b>    | <b>0.0</b>                    | <b>1.7</b>                  | <b>333.3</b>      | <b>1.7</b>     | <b>1.7</b>   |                                  |
| <b>%</b>          | <b>-122%</b>                | <b>-88%</b>               | <b>-200%</b>    | <b>-253%</b> | <b>-300%</b> | <b>-161%</b> | <b>-200%</b> | <b>-220%</b> | <b>#DIV/0!</b>                | <b>-150%</b>                | <b>-127%</b>      | <b>-135%</b>   | <b>-178%</b> |                                  |
| <b>t-test</b>     | <b>0.106</b>                | <b>0.184</b>              | <b>0.050</b>    | <b>0.038</b> | <b>0.029</b> | <b>0.083</b> | <b>0.116</b> | <b>0.060</b> | <b>#DIV/0!</b>                | <b>0.402</b>                | <b>0.448</b>      | <b>0.141</b>   | <b>0.152</b> |                                  |

#### 4) IA Fluocinolone (15 ng)

Animals treated with intra-articular Fluocinolone (15 ng) were not significantly different from the vehicle controls. Lesion severity was increased compared to the vehicle controls, with a total joint score of 10.3. All animals had minimal to mild subacute synovitis.

**Table 26.** Histopathology of proteoglycan and matrix loss in MIA Trial 3 IA Fluocinolone-treated animals.

| Group 4<br>Cmpd C | MTP          |              |              |              | MFC          |              |              |              | LTP          |              |              |              | LFC          |              |              |              |
|-------------------|--------------|--------------|--------------|--------------|--------------|--------------|--------------|--------------|--------------|--------------|--------------|--------------|--------------|--------------|--------------|--------------|
|                   | % loss of    |              |              |              | % loss of    |              |              |              | % loss of    |              |              |              | % loss of    |              |              |              |
|                   | Cell         | PG           | Matrix       | Mean         | Cell         | PG           | Matrix       | Mean         | Cell         | PG           | Matrix       | Mean         | Cell         | PG           | Matrix       | Mean         |
| 25                | 100          | 100          | 40           | 80           | 100          | 100          | 10           | 70           | 100          | 75           | 25           | 66.667       | 100          | 100          | 25           | 75           |
| 28                | 100          | 100          | 25           | 75           | 100          | 100          | 40           | 80           | 100          | 100          | 100          | 100          | 100          | 100          | 90           | 96.667       |
| 39                | 2            | 0            | 0            | 0.6667       | 0            | 0            | 0            | 0            | 0            | 0            | 0            | 0            | 2            | 0            | 0            | 0.6667       |
| <b>Mean</b>       | <b>67.3</b>  | <b>66.7</b>  | <b>21.7</b>  | <b>51.9</b>  | <b>66.7</b>  | <b>66.7</b>  | <b>16.7</b>  | <b>50.0</b>  | <b>66.7</b>  | <b>58.3</b>  | <b>41.7</b>  | <b>55.6</b>  | <b>67.3</b>  | <b>66.7</b>  | <b>38.3</b>  | <b>57.4</b>  |
| <b>SE</b>         | <b>32.7</b>  | <b>33.3</b>  | <b>11.7</b>  | <b>25.7</b>  | <b>33.3</b>  | <b>33.3</b>  | <b>12.0</b>  | <b>25.2</b>  | <b>33.3</b>  | <b>30.0</b>  | <b>30.0</b>  | <b>29.4</b>  | <b>32.7</b>  | <b>33.3</b>  | <b>26.8</b>  | <b>29.1</b>  |
| <b>%</b>          | <b>-1%</b>   | <b>-14%</b>  | <b>-8%</b>   | <b>-7%</b>   | <b>-5%</b>   | <b>-14%</b>  | <b>17%</b>   | <b>-6%</b>   | <b>-14%</b>  | <b>-17%</b>  | <b>-127%</b> | <b>-32%</b>  | <b>-92%</b>  | <b>-90%</b>  | <b>-130%</b> | <b>-99%</b>  |
| <b>t-test</b>     | <b>0.989</b> | <b>0.862</b> | <b>0.935</b> | <b>0.926</b> | <b>0.946</b> | <b>0.862</b> | <b>0.872</b> | <b>0.941</b> | <b>0.862</b> | <b>0.851</b> | <b>0.530</b> | <b>0.743</b> | <b>0.522</b> | <b>0.534</b> | <b>0.530</b> | <b>0.513</b> |

**Table 27.** Histopathology of cartilage, bone, & synovium in MIA Trial 3 IA Fluocinolone-treated animals.

| Group 4<br>Cmpd C | Mean of<br>All<br>Cartilage | Matrix<br>Damage<br>Score | Bone Resorption |              |              |              |              |              | Subchond<br>Bone<br>Sclerosis | Osteophyte<br>Measure<br>µm | Total Joint Score |               | Synovitis    |                  |
|-------------------|-----------------------------|---------------------------|-----------------|--------------|--------------|--------------|--------------|--------------|-------------------------------|-----------------------------|-------------------|---------------|--------------|------------------|
|                   |                             |                           | Score           | Percent      |              |              |              | Mean         |                               |                             | with<br>Matrix    | w/o<br>Matrix |              |                  |
|                   |                             |                           |                 | MTP          | MFC          | LTP          | LFC          |              |                               |                             |                   |               |              |                  |
| 25                | 72.9                        | 4                         | 5               | 100%         | 90%          | 100%         | 100%         | 98%          | 0                             | 4                           | 880<br>(MTP)      | 13            | 9            | Mild subacute    |
| 28                | 87.9                        | 5                         | 5               | 100%         | 100%         | 100%         | 100%         | 100%         | 0                             | 3                           | 640<br>(MTP)      | 13            | 8            | Mild subacute    |
| 39                | 0.3                         | 1                         | 1               | 1%           | 25%          | 0%           | 0%           | 7%           | 0                             | 3                           | 600<br>(MFC)      | 5             | 4            | Minimal subacute |
| <b>Mean</b>       | <b>53.7</b>                 | <b>3.3</b>                | <b>3.7</b>      | <b>67%</b>   | <b>72%</b>   | <b>67%</b>   | <b>67%</b>   | <b>68%</b>   | <b>0.0</b>                    | <b>3.3</b>                  | <b>706.7</b>      | <b>10.3</b>   | <b>7.0</b>   |                  |
| <b>SE</b>         | <b>27.0</b>                 | <b>1.2</b>                | <b>1.3</b>      | <b>33%</b>   | <b>24%</b>   | <b>33%</b>   | <b>33%</b>   | <b>31%</b>   | <b>0.0</b>                    | <b>0.3</b>                  | <b>87.4</b>       | <b>2.7</b>    | <b>1.5</b>   |                  |
| <b>%</b>          | <b>-29%</b>                 | <b>-25%</b>               | <b>-120%</b>    | <b>-136%</b> | <b>-187%</b> | <b>-74%</b>  | <b>-100%</b> | <b>-118%</b> | <b>#DIV/0!</b>                | <b>-150%</b>                | <b>-141%</b>      | <b>-82%</b>   | <b>-133%</b> |                  |
| <b>t-test</b>     | <b>0.756</b>                | <b>0.742</b>              | <b>0.328</b>    | <b>0.394</b> | <b>0.225</b> | <b>0.544</b> | <b>0.519</b> | <b>0.416</b> | <b>#DIV/0!</b>                | <b>0.219</b>                | <b>0.248</b>      | <b>0.375</b>  | <b>0.246</b> |                  |

### 5) IA Meloxicam (100 µg)

Animals treated with intra-articular Meloxicam (100 µg) were not significantly different from the vehicle controls. Lesion severity was decreased compared to the vehicle controls, with a total joint score of 3 (47% decrease). All animals had minimal to moderate subacute synovitis.

**Table 28.** Histopathology of proteoglycan and matrix loss in MIA Trial 3 IA Meloxicam-treated animals.

| Group 5<br>Cmpd D | MTP          |              |              |              | MFC          |              |              |              | LTP          |              |              |              | LFC          |              |              |              |
|-------------------|--------------|--------------|--------------|--------------|--------------|--------------|--------------|--------------|--------------|--------------|--------------|--------------|--------------|--------------|--------------|--------------|
|                   | % loss of    |              |              |              | % loss of    |              |              |              | % loss of    |              |              |              | % loss of    |              |              |              |
|                   | Cell         | PG           | Matrix       | Mean         | Cell         | PG           | Matrix       | Mean         | Cell         | PG           | Matrix       | Mean         | Cell         | PG           | Matrix       | Mean         |
| 21                | 2            | 1            | 0            | 1            | 0            | 0            | 0            | 0            | 0            | 0            | 0            | 0            | 0            | 0            | 0            | 0            |
| 30                | 70           | 60           | 5            | 45           | 40           | 12.5         | 0            | 17.5         | 0            | 0            | 0            | 0            | 0            | 0            | 0            | 0            |
| 42                | 80           | 50           | 5            | 45           | 20           | 5            | 0            | 8.3333       | 0            | 0            | 0            | 0            | 0            | 0            | 0            | 0            |
| <b>Mean</b>       | <b>50.7</b>  | <b>37.0</b>  | <b>3.3</b>   | <b>30.3</b>  | <b>20.0</b>  | <b>5.8</b>   | <b>0.0</b>   | <b>8.6</b>   | <b>0.0</b>   | <b>0.0</b>   | <b>0.0</b>   | <b>0.0</b>   | <b>0.0</b>   | <b>0.0</b>   | <b>0.0</b>   | <b>0.0</b>   |
| <b>SE</b>         | <b>24.5</b>  | <b>18.2</b>  | <b>1.7</b>   | <b>14.7</b>  | <b>11.5</b>  | <b>3.6</b>   | <b>0.0</b>   | <b>5.1</b>   | <b>0.0</b>   | <b>0.0</b>   | <b>0.0</b>   | <b>0.0</b>   | <b>0.0</b>   | <b>0.0</b>   | <b>0.0</b>   | <b>0.0</b>   |
| <b>%</b>          | <b>24%</b>   | <b>37%</b>   | <b>83%</b>   | <b>37%</b>   | <b>68%</b>   | <b>90%</b>   | <b>100%</b>  | <b>82%</b>   | <b>100%</b>  | <b>100%</b>  | <b>100%</b>  | <b>100%</b>  | <b>100%</b>  | <b>100%</b>  | <b>100%</b>  | <b>100%</b>  |
| <b>t-test</b>     | <b>0.719</b> | <b>0.577</b> | <b>0.339</b> | <b>0.568</b> | <b>0.269</b> | <b>0.158</b> | <b>0.261</b> | <b>0.200</b> | <b>0.124</b> | <b>0.158</b> | <b>0.313</b> | <b>0.154</b> | <b>0.343</b> | <b>0.343</b> | <b>0.374</b> | <b>0.349</b> |

**Table 29.** Histopathology of cartilage, bone, and synovium in MIA Trial 3 IA Meloxicam-treated animals.

| Group 5<br>Cmpd D | Mean of<br>All<br>Cartilage | Matrix<br>Damage<br>Score | Bone Resorption |              |              |              |              |              | Subchond<br>Bone<br>Sclerosis | Osteophyte<br>Measure<br>µm | Total Joint Score |               | Synovitis    |                   |
|-------------------|-----------------------------|---------------------------|-----------------|--------------|--------------|--------------|--------------|--------------|-------------------------------|-----------------------------|-------------------|---------------|--------------|-------------------|
|                   |                             |                           | Score           | Percent      |              |              |              | Mean         |                               |                             | with<br>Matrix    | w/o<br>Matrix |              |                   |
|                   |                             |                           |                 | MTP          | MFC          | LTP          | LFC          |              |                               |                             |                   |               |              |                   |
| 21                | 0.3                         | 1                         | 0               | 0%           | 0%           | 0%           | 0%           | 0%           | 0                             | 0                           | 0                 | 1             | 0            | Minimal subacute  |
| 30                | 15.6                        | 1                         | 2               | 25%          | 25%          | 0%           | 0%           | 13%          | 0                             | 0                           | 0                 | 3             | 2            | Moderate subacute |
| 42                | 13.3                        | 1                         | 1               | 20%          | 20%          | 0%           | 0%           | 10%          | 1<br>(MTP)                    | 2<br>(MFC)                  | 440               | 5             | 4            | Minimal subacute  |
| <b>Mean</b>       | <b>9.7</b>                  | <b>1.0</b>                | <b>1.0</b>      | <b>15%</b>   | <b>15%</b>   | <b>0%</b>    | <b>0%</b>    | <b>8%</b>    | <b>0.3</b>                    | <b>0.7</b>                  | <b>146.7</b>      | <b>3.0</b>    | <b>2.0</b>   |                   |
| <b>SE</b>         | <b>4.8</b>                  | <b>0.0</b>                | <b>0.6</b>      | <b>8%</b>    | <b>8%</b>    | <b>0%</b>    | <b>0%</b>    | <b>4%</b>    | <b>0.3</b>                    | <b>0.7</b>                  | <b>146.7</b>      | <b>1.2</b>    | <b>1.2</b>   |                   |
| <b>%</b>          | <b>77%</b>                  | <b>63%</b>                | <b>40%</b>      | <b>47%</b>   | <b>40%</b>   | <b>100%</b>  | <b>100%</b>  | <b>76%</b>   | <b>#DIV/0!</b>                | <b>50%</b>                  | <b>50%</b>        | <b>47%</b>    | <b>33%</b>   |                   |
| <b>t-test</b>     | <b>0.263</b>                | <b>0.315</b>              | <b>0.643</b>    | <b>0.618</b> | <b>0.696</b> | <b>0.226</b> | <b>0.374</b> | <b>0.424</b> | <b>0.374</b>                  | <b>0.678</b>                | <b>0.678</b>      | <b>0.543</b>  | <b>0.736</b> |                   |

## 6) IA Tranilast (500 ng)

Animals treated with intra-articular Tranilast (500 ng) had significantly increased matrix loss in the MTP. Bone resorption was also significantly increased in the MTP and MFC, which resulted in a significant increase in the overall bone resorption score. All animals had mild subacute synovitis with fibrosis.

**Table 30.** Histopathological analysis of proteoglycan and matrix loss in MIA Trial 3 IA Tranilast-treated animals.

| Group 6<br>Cmpd E | MTP          |              |              |              | MFC          |              |              |              | LTP          |              |              |              | LFC          |              |              |              |
|-------------------|--------------|--------------|--------------|--------------|--------------|--------------|--------------|--------------|--------------|--------------|--------------|--------------|--------------|--------------|--------------|--------------|
|                   | % loss of    |              |              |              | % loss of    |              |              |              | % loss of    |              |              |              | % loss of    |              |              |              |
|                   | Cell         | PG           | Matrix       | Mean         | Cell         | PG           | Matrix       | Mean         | Cell         | PG           | Matrix       | Mean         | Cell         | PG           | Matrix       | Mean         |
| 7                 | 100          | 100          | 90           | 96.667       | 100          | 100          | 40           | 80           | 100          | 100          | 50           | 83.333       | 100          | 100          | 40           | 80           |
| 11                | 100          | 100          | 90           | 96.667       | 100          | 100          | 80           | 93.333       | 100          | 100          | 75           | 91.667       | 100          | 100          | 75           | 91.667       |
| 22                | 100          | 100          | 60           | 86.667       | 100          | 100          | 80           | 93.333       | 100          | 100          | 75           | 91.667       | 100          | 100          | 75           | 91.667       |
| <b>Mean</b>       | <b>100.0</b> | <b>100.0</b> | <b>80.0</b>  | <b>93.3</b>  | <b>100.0</b> | <b>100.0</b> | <b>66.7</b>  | <b>88.9</b>  | <b>100.0</b> | <b>100.0</b> | <b>66.7</b>  | <b>88.9</b>  | <b>100.0</b> | <b>100.0</b> | <b>63.3</b>  | <b>87.8</b>  |
| <b>SE</b>         | <b>0.0</b>   | <b>0.0</b>   | <b>10.0</b>  | <b>3.3</b>   | <b>0.0</b>   | <b>0.0</b>   | <b>13.3</b>  | <b>4.4</b>   | <b>0.0</b>   | <b>0.0</b>   | <b>8.3</b>   | <b>2.8</b>   | <b>0.0</b>   | <b>0.0</b>   | <b>11.7</b>  | <b>3.9</b>   |
| <b>%</b>          | <b>-50%</b>  | <b>-71%</b>  | <b>-300%</b> | <b>-93%</b>  | <b>-58%</b>  | <b>-71%</b>  | <b>-233%</b> | <b>-88%</b>  | <b>-71%</b>  | <b>-100%</b> | <b>-264%</b> | <b>-111%</b> | <b>-186%</b> | <b>-186%</b> | <b>-280%</b> | <b>-204%</b> |
| <b>t-test</b>     | <b>0.374</b> | <b>0.238</b> | <b>0.030</b> | <b>0.149</b> | <b>0.313</b> | <b>0.238</b> | <b>0.083</b> | <b>0.172</b> | <b>0.238</b> | <b>0.158</b> | <b>0.055</b> | <b>0.126</b> | <b>0.116</b> | <b>0.116</b> | <b>0.084</b> | <b>0.099</b> |

**Table 31.** Histopathological analysis of cartilage, bone, and synovium in MIA Trial 3 IA Tranilast-treated animals.

| Group 6<br>Cmpd E | Mean of      | Matrix       | Bone Resorption |              |              |              |              |              | Subchond       | Osteophyte   | Total Joint Score |              | Synovitis    |                                |
|-------------------|--------------|--------------|-----------------|--------------|--------------|--------------|--------------|--------------|----------------|--------------|-------------------|--------------|--------------|--------------------------------|
|                   | All          | Damage       | Percent         |              |              |              |              |              | Bone           | Measure      | with              | w/o          |              |                                |
|                   | Cartilage    | Score        | Score           | MTP          | MFC          | LTP          | LFC          | Mean         | Sclerosis      | Score        | µm                | Matrix       | Matrix       |                                |
| 7                 | 85.0         | 5            | 5               | 100%         | 100%         | 100%         | 100%         | 100%         | 0              | 5            | 1000<br>(MTP)     | 15           | 10           | Mild subacute<br>with fibrosis |
| 11                | 93.3         | 5            | 5               | 100%         | 100%         | 100%         | 100%         | 100%         | 0              | 4            | 800<br>(MFC)      | 14           | 9            | Mild subacute<br>with fibrosis |
| 22                | 90.8         | 5            | 5               | 90%          | 100%         | 100%         | 100%         | 98%          | 0              | 4            | 880<br>(MFC)      | 14           | 9            | Mild subacute<br>with fibrosis |
| <b>Mean</b>       | <b>89.7</b>  | <b>5.0</b>   | <b>5.0</b>      | <b>97%</b>   | <b>100%</b>  | <b>100%</b>  | <b>100%</b>  | <b>99%</b>   | <b>0.0</b>     | <b>4.3</b>   | <b>893.3</b>      | <b>14.3</b>  | <b>9.3</b>   |                                |
| <b>SE</b>         | <b>2.5</b>   | <b>0.0</b>   | <b>0.0</b>      | <b>3%</b>    | <b>0%</b>    | <b>0%</b>    | <b>0%</b>    | <b>1%</b>    | <b>0.0</b>     | <b>0.3</b>   | <b>58.1</b>       | <b>0.3</b>   | <b>0.3</b>   |                                |
| <b>%</b>          | <b>-115%</b> | <b>-88%</b>  | <b>-200%</b>    | <b>-241%</b> | <b>-300%</b> | <b>-161%</b> | <b>-200%</b> | <b>-217%</b> | <b>#DIV/0!</b> | <b>-225%</b> | <b>-205%</b>      | <b>-153%</b> | <b>-211%</b> |                                |
| <b>t-test</b>     | <b>0.118</b> | <b>0.184</b> | <b>0.050</b>    | <b>0.045</b> | <b>0.029</b> | <b>0.083</b> | <b>0.116</b> | <b>0.062</b> | <b>#DIV/0!</b> | <b>0.094</b> | <b>0.115</b>      | <b>0.088</b> | <b>0.067</b> |                                |

## 7) IA Trimacinalone Hexacetonide (TH) (0.15 mg)

Animals treated with IA Trimacinalone Hexacetonide (0.15 mg) had significantly increased matrix loss in the MTP. Lesion severity was non-significantly increased, in general, with a total joint score of 8.3. All animals had subacute synovitis and hypocellular marrow. Lesion morphology suggests that this compound inhibited MIA lesions, but that the cartilage was ground away mechanically.

**Table 32.** Histopathology of proteoglycan and matrix in MIA Trial 3 IA TH-treated animals.

| Group 7<br>Cmpd F | MTP          |              |              |              | MFC          |              |              |              | LTP          |              |              |              | LFC          |              |              |              |
|-------------------|--------------|--------------|--------------|--------------|--------------|--------------|--------------|--------------|--------------|--------------|--------------|--------------|--------------|--------------|--------------|--------------|
|                   | % loss of    |              |              |              | % loss of    |              |              |              | % loss of    |              |              |              | % loss of    |              |              |              |
|                   | Cell         | PG           | Matrix       | Mean         | Cell         | PG           | Matrix       | Mean         | Cell         | PG           | Matrix       | Mean         | Cell         | PG           | Matrix       | Mean         |
| 14                | 100          | 100          | 100          | 100          | 90           | 90           | 90           | 90           | 15           | 5            | 1            | 7            | 0            | 0            | 0            | 0            |
| 29                | 100          | 100          | 100          | 100          | 100          | 100          | 100          | 100          | 100          | 100          | 100          | 100          | 100          | 100          | 100          | 100          |
| 45                | 95           | 95           | 50           | 80           | 80           | 40           | 10           | 43.333       | 2            | 1            | 0            | 1            | 30           | 5            | 0            | 11.667       |
| <b>Mean</b>       | <b>98.3</b>  | <b>98.3</b>  | <b>83.3</b>  | <b>93.3</b>  | <b>90.0</b>  | <b>76.7</b>  | <b>66.7</b>  | <b>77.8</b>  | <b>39.0</b>  | <b>35.3</b>  | <b>33.7</b>  | <b>36.0</b>  | <b>43.3</b>  | <b>35.0</b>  | <b>33.3</b>  | <b>37.2</b>  |
| <b>SE</b>         | <b>1.7</b>   | <b>1.7</b>   | <b>16.7</b>  | <b>6.7</b>   | <b>5.8</b>   | <b>18.6</b>  | <b>28.5</b>  | <b>17.5</b>  | <b>30.7</b>  | <b>32.4</b>  | <b>33.2</b>  | <b>32.0</b>  | <b>29.6</b>  | <b>32.5</b>  | <b>33.3</b>  | <b>31.6</b>  |
| <b>%</b>          | <b>-48%</b>  | <b>-69%</b>  | <b>-317%</b> | <b>-93%</b>  | <b>-42%</b>  | <b>-31%</b>  | <b>-233%</b> | <b>-65%</b>  | <b>33%</b>   | <b>29%</b>   | <b>-84%</b>  | <b>15%</b>   | <b>-24%</b>  | <b>0%</b>    | <b>-100%</b> | <b>-29%</b>  |
| <b>t-test</b>     | <b>0.396</b> | <b>0.255</b> | <b>0.049</b> | <b>0.157</b> | <b>0.456</b> | <b>0.631</b> | <b>0.222</b> | <b>0.369</b> | <b>0.676</b> | <b>0.752</b> | <b>0.698</b> | <b>0.884</b> | <b>0.859</b> | <b>1.000</b> | <b>0.678</b> | <b>0.851</b> |

**Table 33.** Histopathology of cartilage, bone, and synovium in MIA Trial 3 IA TH-treated animals.

| Group 7<br>Cmpd F | Mean of<br>All<br>Cartilage | Matrix<br>Damage<br>Score | Bone Resorption |              |              |              |              |              | Subchond<br>Bone<br>Sclerosis | Osteophyte<br>Measure<br>µm | Total Joint Score |               | Synovitis    |                                         |
|-------------------|-----------------------------|---------------------------|-----------------|--------------|--------------|--------------|--------------|--------------|-------------------------------|-----------------------------|-------------------|---------------|--------------|-----------------------------------------|
|                   |                             |                           | Percent         |              |              |              |              |              |                               |                             | with<br>Matrix    | w/o<br>Matrix |              |                                         |
|                   |                             |                           | Score           | MTP          | MFC          | LTP          | LFC          | Mean         |                               |                             |                   |               |              |                                         |
| 14                | 49.3                        | 3                         | 1               | 0%           | 5%           | 1%           | 0%           | 2%           | 1                             | 3                           | 680<br>(MFC)      | 8             | 5            | Minimal subacute<br>Marrow hypocellular |
| 29                | 100.0                       | 5                         | 5               | 90%          | 100%         | 100%         | 100%         | 98%          | 0                             | 3                           | 680<br>(MFC)      | 13            | 8            | Severe subacute<br>Marrow hypocellular  |
| 45                | 34.0                        | 2                         | 1               | 5%           | 0%           | 2%           | 5%           | 3%           | 1                             | 0                           | 0                 | 4             | 2            | Minimal subacute<br>Marrow hypocellular |
| <b>Mean</b>       | <b>61.1</b>                 | <b>3.3</b>                | <b>2.3</b>      | <b>32%</b>   | <b>35%</b>   | <b>34%</b>   | <b>35%</b>   | <b>34%</b>   | <b>0.7</b>                    | <b>2.0</b>                  | <b>453.3</b>      | <b>8.3</b>    | <b>5.0</b>   |                                         |
| <b>SE</b>         | <b>20.0</b>                 | <b>0.9</b>                | <b>1.3</b>      | <b>29%</b>   | <b>33%</b>   | <b>33%</b>   | <b>33%</b>   | <b>32%</b>   | <b>0.3</b>                    | <b>1.0</b>                  | <b>226.7</b>      | <b>2.6</b>    | <b>1.7</b>   |                                         |
| <b>%</b>          | <b>-47%</b>                 | <b>-25%</b>               | <b>-40%</b>     | <b>-12%</b>  | <b>-40%</b>  | <b>10%</b>   | <b>-5%</b>   | <b>-9%</b>   | <b>#DIV/0!</b>                | <b>-50%</b>                 | <b>-55%</b>       | <b>-47%</b>   | <b>-67%</b>  |                                         |
| <b>t-test</b>     | <b>0.568</b>                | <b>0.715</b>              | <b>0.729</b>    | <b>0.933</b> | <b>0.813</b> | <b>0.929</b> | <b>0.973</b> | <b>0.950</b> | <b>0.116</b>                  | <b>0.710</b>                | <b>0.688</b>      | <b>0.596</b>  | <b>0.548</b> |                                         |

## 8) Systemic Clonidine (100 µg/kg)

Animals treated with Clonidine systemically (100 µg/kg) were not significantly different from the vehicle controls. Lesion severity was increased compared to the vehicle controls, with a total joint score of 10.7. All animals had minimal to mild subacute synovitis and one had fibrosis.

**Table 34.** Histopathological analysis of proteoglycan and matrix loss in MIA Trial 3 Clonidine-treated animals.

| Group 8<br>Clonidine | MTP          |              |              |              | MFC          |              |              |              | LTP          |              |              |              | LFC          |              |              |              |
|----------------------|--------------|--------------|--------------|--------------|--------------|--------------|--------------|--------------|--------------|--------------|--------------|--------------|--------------|--------------|--------------|--------------|
|                      | % loss of    |              |              |              | % loss of    |              |              |              | % loss of    |              |              |              | % loss of    |              |              |              |
|                      | Cell         | PG           | Matrix       | Mean         | Cell         | PG           | Matrix       | Mean         | Cell         | PG           | Matrix       | Mean         | Cell         | PG           | Matrix       | Mean         |
| 1                    | 100          | 100          | 50           | 83.333       | 100          | 75           | 30           | 68.333       | 100          | 100          | 75           | 91.667       | 100          | 75           | 25           | 66.667       |
| 12                   | 100          | 100          | 90           | 96.667       | 100          | 100          | 75           | 91.667       | 100          | 100          | 75           | 91.667       | 100          | 100          | 75           | 91.667       |
| 18                   | 65           | 35           | 5            | 35           | 10           | 5            | 0            | 5            | 60           | 30           | 5            | 31.667       | 50           | 25           | 0            | 25           |
| <b>Mean</b>          | <b>88.3</b>  | <b>78.3</b>  | <b>48.3</b>  | <b>71.7</b>  | <b>70.0</b>  | <b>60.0</b>  | <b>35.0</b>  | <b>55.0</b>  | <b>86.7</b>  | <b>76.7</b>  | <b>51.7</b>  | <b>71.7</b>  | <b>83.3</b>  | <b>66.7</b>  | <b>33.3</b>  | <b>61.1</b>  |
| <b>SE</b>            | <b>11.7</b>  | <b>21.7</b>  | <b>24.6</b>  | <b>18.7</b>  | <b>30.0</b>  | <b>28.4</b>  | <b>21.8</b>  | <b>25.9</b>  | <b>13.3</b>  | <b>23.3</b>  | <b>23.3</b>  | <b>20.0</b>  | <b>16.7</b>  | <b>22.0</b>  | <b>22.0</b>  | <b>19.4</b>  |
| <b>%</b>             | <b>-33%</b>  | <b>-34%</b>  | <b>-142%</b> | <b>-48%</b>  | <b>-11%</b>  | <b>-3%</b>   | <b>-75%</b>  | <b>-16%</b>  | <b>-49%</b>  | <b>-53%</b>  | <b>-182%</b> | <b>-70%</b>  | <b>-138%</b> | <b>-90%</b>  | <b>-100%</b> | <b>-112%</b> |
| <b>t-test</b>        | <b>0.573</b> | <b>0.618</b> | <b>0.383</b> | <b>0.496</b> | <b>0.886</b> | <b>0.970</b> | <b>0.603</b> | <b>0.839</b> | <b>0.437</b> | <b>0.512</b> | <b>0.303</b> | <b>0.400</b> | <b>0.257</b> | <b>0.466</b> | <b>0.579</b> | <b>0.390</b> |



**Table 35.** Histopathological analysis of cartilage, bone, and synovium in MIA Trial 3 Clonidine-treated animals.

| Group 8<br>Clonidine | Mean of<br>All<br>Cartilage | Matrix<br>Damage<br>Score | Bone Resorption |              |              |              |              |              | Subchond<br>Bone<br>Sclerosis | Osteophyte<br>Measure<br>µm | Total Joint Score |                | Synovitis    |                                |
|----------------------|-----------------------------|---------------------------|-----------------|--------------|--------------|--------------|--------------|--------------|-------------------------------|-----------------------------|-------------------|----------------|--------------|--------------------------------|
|                      |                             |                           | Score           | Percent      |              |              |              |              |                               |                             | Score             | with<br>Matrix |              | w/ o<br>Matrix                 |
|                      |                             |                           |                 | MTP          | MFC          | LTP          | LFC          | Mean         |                               |                             |                   |                |              |                                |
| 1                    | 77.5                        | 4                         | 5               | 100%         | 90%          | 100%         | 100%         | 98%          | 0                             | 5                           | 1000<br>(MTP)     | 14             | 10           | Mild subacute<br>with fibrosis |
| 12                   | 92.9                        | 5                         | 5               | 100%         | 100%         | 100%         | 100%         | 100%         | 0                             | 3                           | 680<br>(MFC)      | 13             | 8            | Mild subacute                  |
| 18                   | 24.2                        | 2                         | 3               | 50%          | 10%          | 60%          | 15%          | 34%          | 0                             | 0                           | 0                 | 5              | 3            | Minimal subacute               |
| <b>Mean</b>          | <b>64.9</b>                 | <b>3.7</b>                | <b>4.3</b>      | <b>83%</b>   | <b>67%</b>   | <b>87%</b>   | <b>72%</b>   | <b>77%</b>   | <b>0.0</b>                    | <b>2.7</b>                  | <b>560.0</b>      | <b>10.7</b>    | <b>7.0</b>   |                                |
| <b>SE</b>            | <b>20.8</b>                 | <b>0.9</b>                | <b>0.7</b>      | <b>17%</b>   | <b>28%</b>   | <b>13%</b>   | <b>28%</b>   | <b>22%</b>   | <b>0.0</b>                    | <b>1.5</b>                  | <b>294.8</b>      | <b>2.8</b>     | <b>2.1</b>   |                                |
| <b>%</b>             | <b>-56%</b>                 | <b>-38%</b>               | <b>-160%</b>    | <b>-194%</b> | <b>-167%</b> | <b>-126%</b> | <b>-115%</b> | <b>-147%</b> | <b>#DIV/0!</b>                | <b>-100%</b>                | <b>-91%</b>       | <b>-88%</b>    | <b>-133%</b> |                                |
| <b>t-test</b>        | <b>0.506</b>                | <b>0.588</b>              | <b>0.124</b>    | <b>0.129</b> | <b>0.315</b> | <b>0.182</b> | <b>0.430</b> | <b>0.251</b> | <b>#DIV/0!</b>                | <b>0.536</b>                | <b>0.556</b>      | <b>0.355</b>   | <b>0.288</b> |                                |

## Conclusions

Results of this study indicated that Meloxicam had a somewhat beneficial effect on lesions of MIA-induced arthritis, but the effect was not statistically significant. All other treatments increased lesion severity; however, this was likely a result of lesion variability in the control group in conjunction with the extremely small group size. One control rat had no cartilage lesions (potentially due to mistargeting of the MIA), one was moderate, and one was severe. Variability was evident for all groups except those treated with Tacrolimus (all severe), Meloxicam (all less severe), and Tranilast (all severe). Treatment with Trimacinelone consistently resulted in marrow hypocellularity and lesions that were more suggestive of mechanical cartilage abrasion than purely MIA induced lesions, suggesting the animals continued to use their joint in spite of the injury. These results should be confirmed with histopathological analysis of larger group sizes.

### MIA Trial 3: Representative Images

**Figure 55.** Three representative images from each group from MIA Trial 3. Group 1 was treated with intra-articular (IA) saline (vehicle), group 2 with IA clonidine (4.5  $\mu\text{g}$ ), group 3 with IA Tacrolimus (30 ng), group 4 with IA Fluocinolone (15 ng), group 5 with Meloxicam (100  $\mu\text{g}$ ), group 6 with Tranilast (500 ng), group 7 with Triamcinolone hexacetonide (150  $\mu\text{g}$ ), and group 8 with systemic clonidine (100  $\mu\text{g}/\text{kg}$ ). Note that in the manuscript group 8 was moved into the second position in Table 3 MIA Trial 3. Representative images from this figure are also found in the manuscript (Figure 4).

1. Grp 1, Vehicle, An 3, 16x.

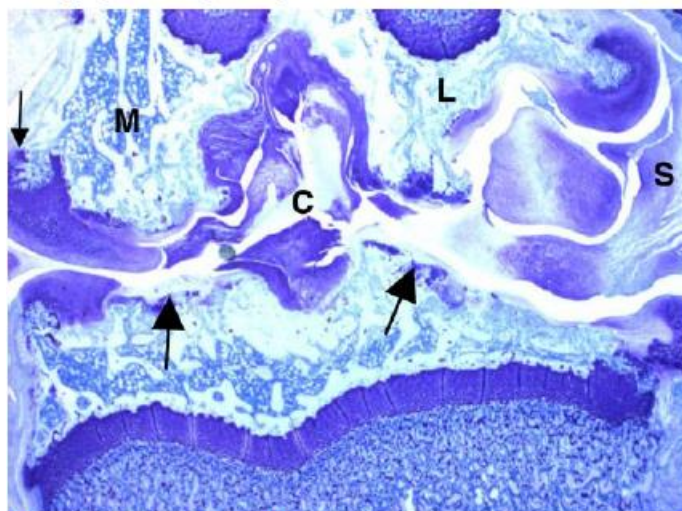

1. Knee from a vehicle treated animal has severe loss of cartilage on all four surfaces, mild subacute synovitis, and a large osteophyte. M and L identify medial and lateral aspects of the joint. C identifies cruciates. S identifies synovium. Large arrows identify representative affected cartilage surfaces; small arrow identifies osteophyte.

2. Grp 1, Vehicle, An 15, 16x.

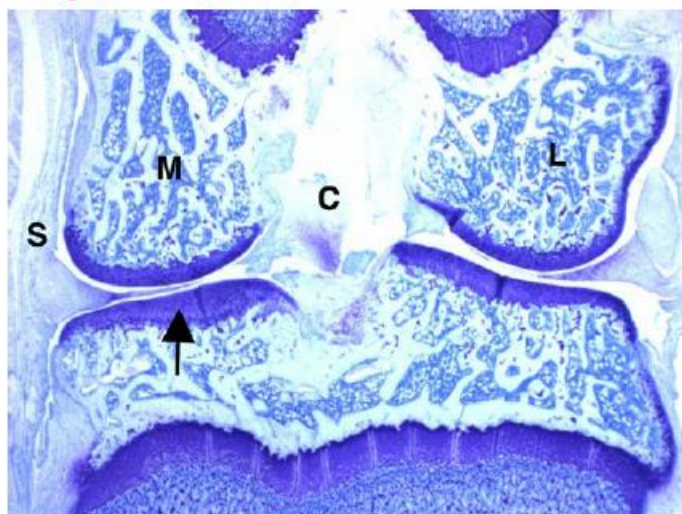

2. Knee from a vehicle treated animal has minimal subacute synovitis with no cartilage loss. M and L identify medial and lateral aspects of the joint. C identifies cruciates. S identifies synovium. Large arrow identifies normal cartilage.

3. Grp 1, Vehicle, An 27, 16x.

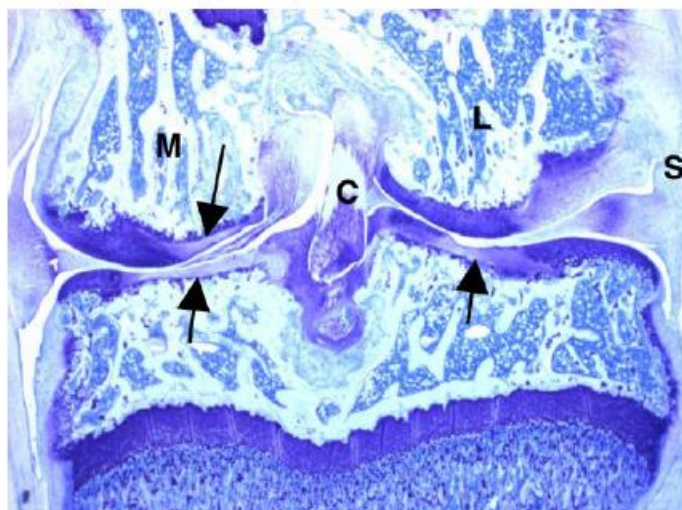

3. Knee from a vehicle treated animal has loss of cartilage on all four surfaces and mild subacute synovitis. M and L identify medial and lateral aspects of the joint. C identifies cruciates. S identifies synovium. Large arrows identify representative affected cartilage surfaces.

1. Grp 2, Cmpd A, An 8, 16x.

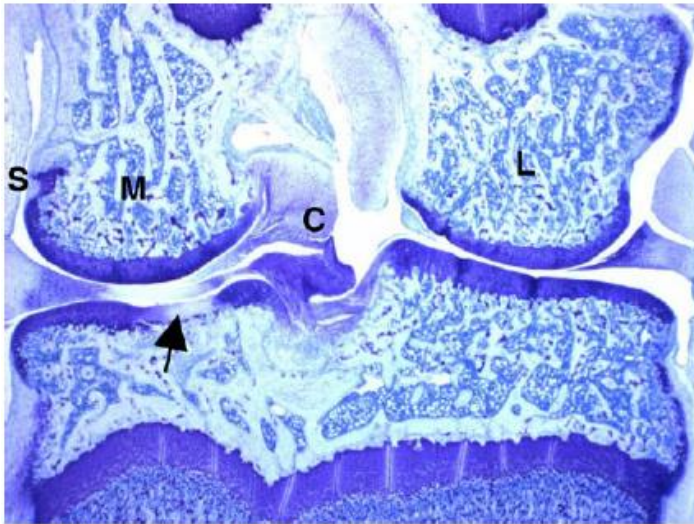

1. Knee from an animal treated with compound A has mild loss of cartilage on the medial tibial plateau and minimal subacute synovitis. M and L identify medial and lateral aspects of the joint. C identifies cruciates. S identifies synovium. Large arrow identifies representative affected cartilage surface.

2. Grp 2, Cmpd A, An 10, 16x.

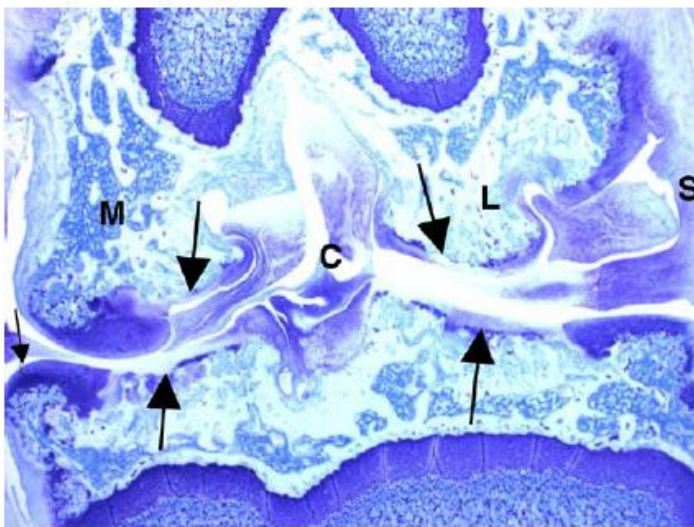

2. Knee from an animal treated with compound A has severe loss of cartilage on all four surfaces, mild subacute synovitis, and a large osteophyte. M and L identify medial and lateral aspects of the joint. C identifies cruciates. S identifies synovium. Large arrows identify representative affected cartilage surfaces; small arrow identifies osteophyte.

3. Grp 2, Cmpd A, An 20, 16x.

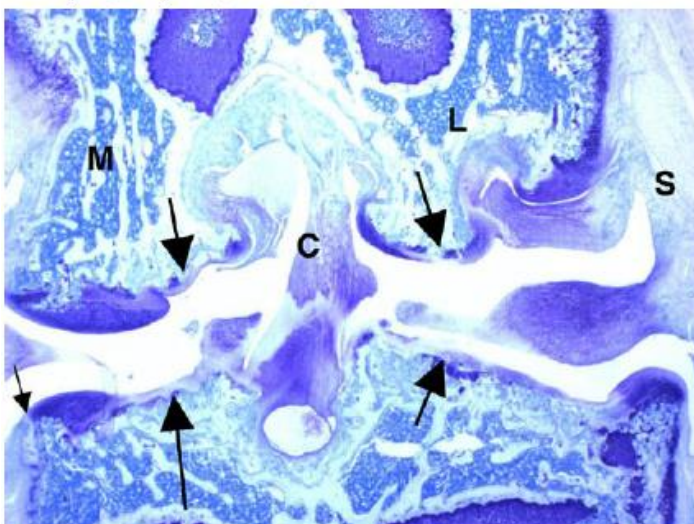

3. Knee from an animal treated with compound A has severe loss of cartilage on all four surfaces, mild subacute synovitis, and a large osteophyte. M and L identify medial and lateral aspects of the joint. C identifies cruciates. S identifies synovium. Large arrows identify representative affected cartilage surfaces; small arrow identifies osteophyte.

1. Grp 3, Cmpd B, An 13, 16x.

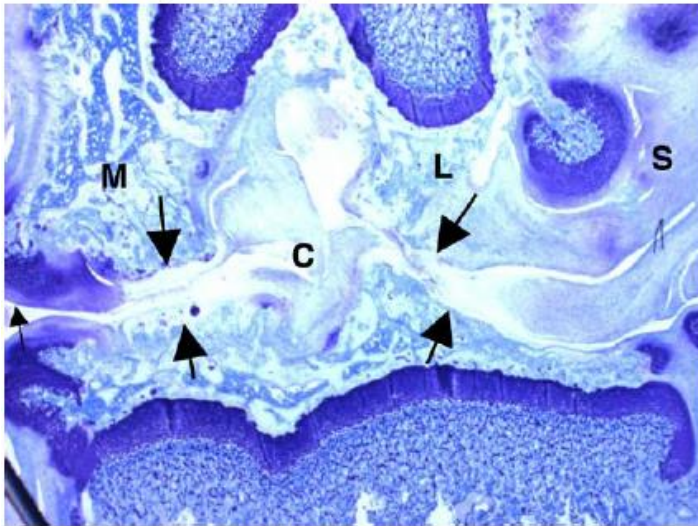

1. Knee from an animal treated with compound B has severe loss of cartilage on all four surfaces, marked subacute synovitis with fibrosis, and a very large osteophyte. M and L identify medial and lateral aspects of the joint. C identifies cruciates. S identifies synovium. Large arrows identify representative affected cartilage surfaces; small arrow identifies osteophyte.

2. Grp 3, Cmpd B, An 17, 16x.

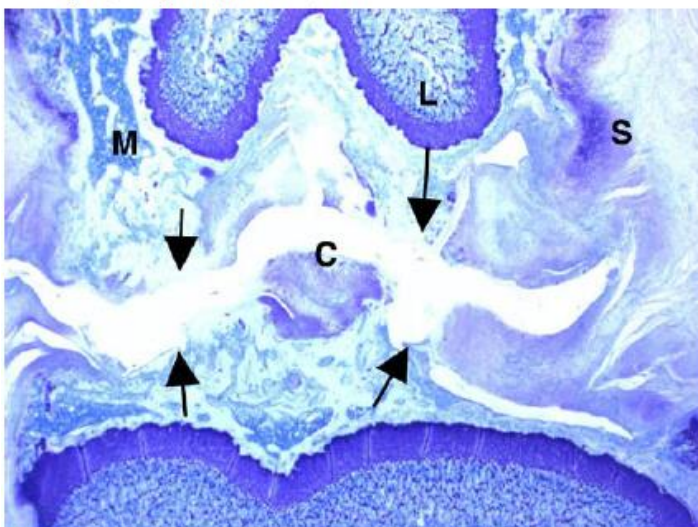

2. Knee from an animal treated with compound B has severe loss of cartilage on all four surfaces and mild subacute synovitis with fibrosis. M and L identify medial and lateral aspects of the joint. C identifies cruciates. S identifies synovium. Large arrows identify representative affected cartilage surfaces.

3. Grp 3, Cmpd B, An 23, 16x.

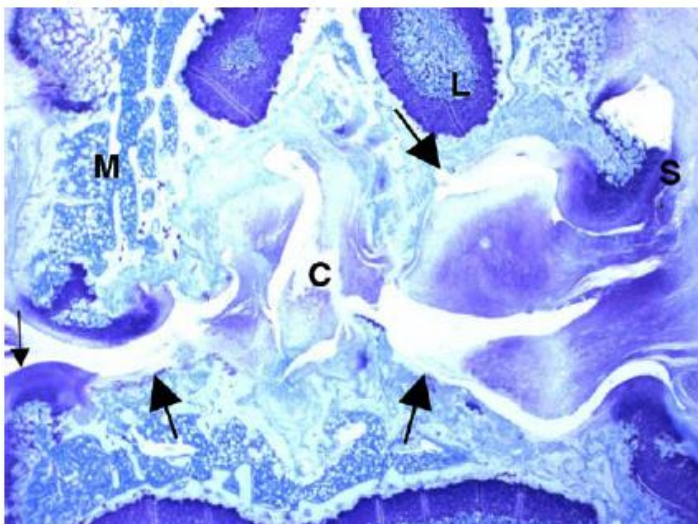

3. Knee from an animal treated with compound B has severe loss of cartilage on all four surfaces, mild subacute synovitis with fibrosis, and a very large osteophyte. M and L identify medial and lateral aspects of the joint. C identifies cruciates. S identifies synovium. Large arrows identify representative affected cartilage surfaces; small arrow identifies osteophyte.

1. Grp 4, Cmpd C, An 25, 16x.

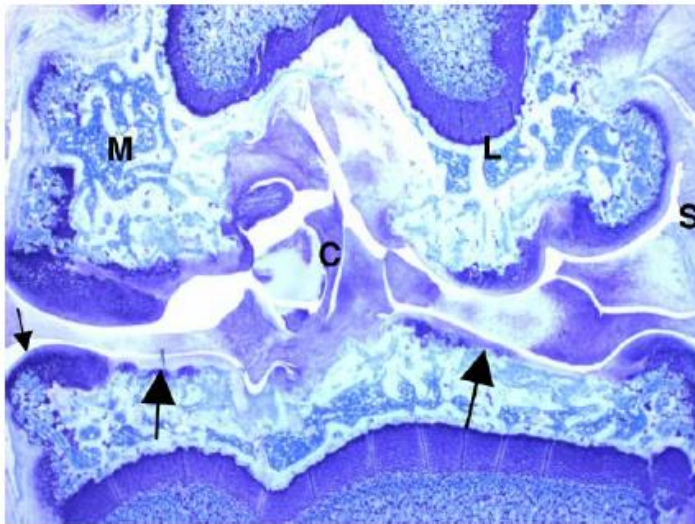

1. Knee from an animal treated with compound C has severe loss of cartilage on all four surfaces, mild subacute synovitis, and a large osteophyte. M and L identify medial and lateral aspects of the joint. C identifies cruciates. S identifies synovium. Large arrows identify representative affected cartilage surfaces; small arrow identifies osteophyte.

2. Grp 4, Cmpd C, An 28, 16x.

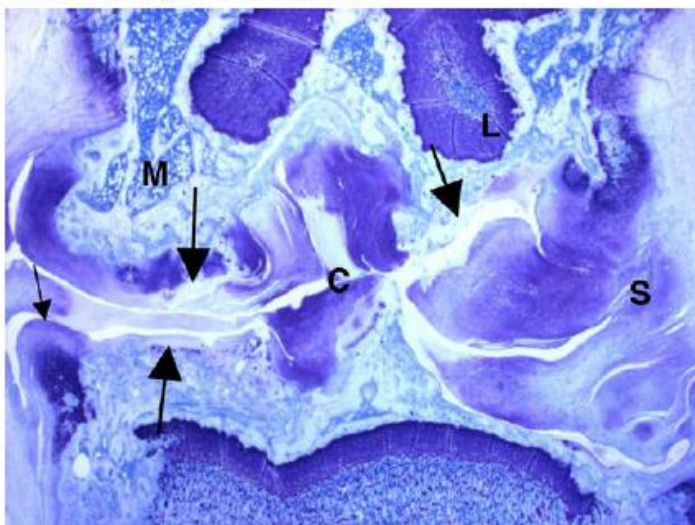

2. Knee from an animal treated with compound C has severe loss of cartilage on all four surfaces, mild subacute synovitis, and a large osteophyte. M and L identify medial and lateral aspects of the joint. C identifies cruciates. S identifies synovium. Large arrows identify representative affected cartilage surfaces; small arrow identifies osteophyte.

3. Grp 4, Cmpd C, An 39, 16x.

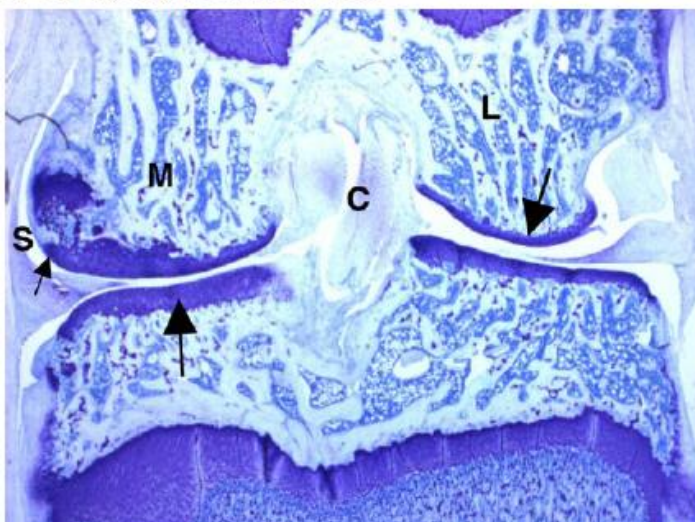

3. Knee from an animal treated with compound C has very slight loss of cartilage on the medial tibial plateau and lateral femoral condyle, minimal subacute synovitis, and a large osteophyte. M and L identify medial and lateral aspects of the joint. C identifies cruciates. S identifies synovium. Large arrows identify representative affected cartilage surfaces; small arrow identifies osteophyte.

1. Grp 5, Cmpd D, An 21, 16x.

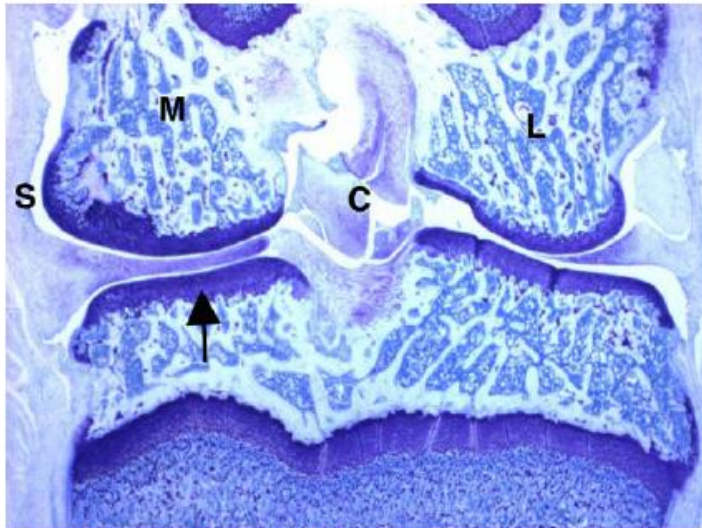

1. Knee from an animal treated with compound D has very slight loss of cartilage on the medial tibial plateau and minimal subacute synovitis. M and L identify medial and lateral aspects of the joint. C identifies cruciates. S identifies synovium. Large arrow identifies representative affected cartilage surface.

2. Grp 5, Cmpd D, An 30, 16x.

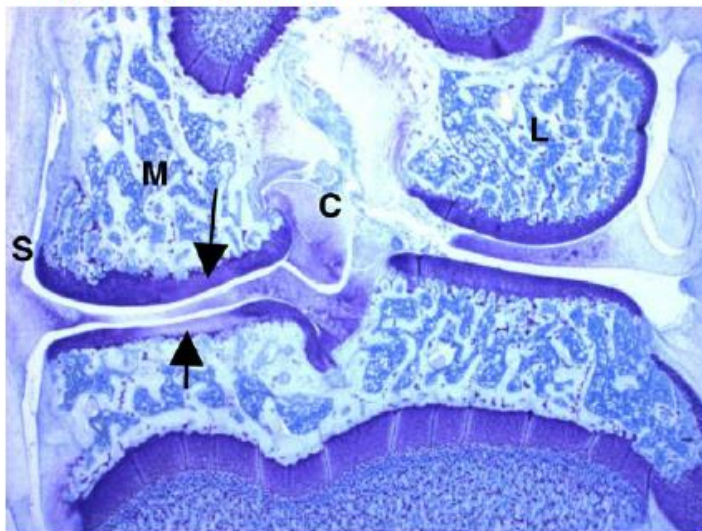

2. Knee from an animal treated with compound D has very slight loss of cartilage on the medial tibial plateau and medial femoral condyle with moderate subacute synovitis. M and L identify medial and lateral aspects of the joint. C identifies cruciates. S identifies synovium. Large arrow identifies representative affected cartilage surface.

3. Grp 5, Cmpd D, An 42, 16x.

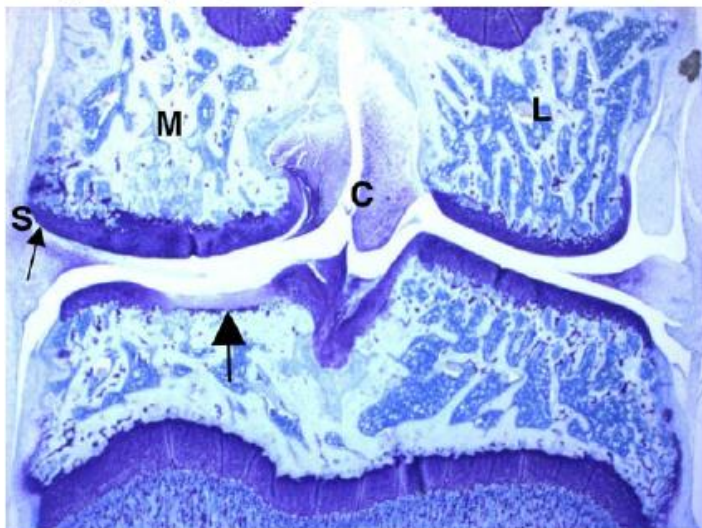

3. Knee from an animal treated with compound D has loss of cartilage on the medial tibial plateau and medial femoral condyle, minimal subacute synovitis, and a medium osteophyte. M and L identify medial and lateral aspects of the joint. C identifies cruciates. S identifies synovium. Large arrow identifies representative affected cartilage surface; small arrow identifies osteophyte.

1. Grp 6, Cmpd E, An 7, 16x.

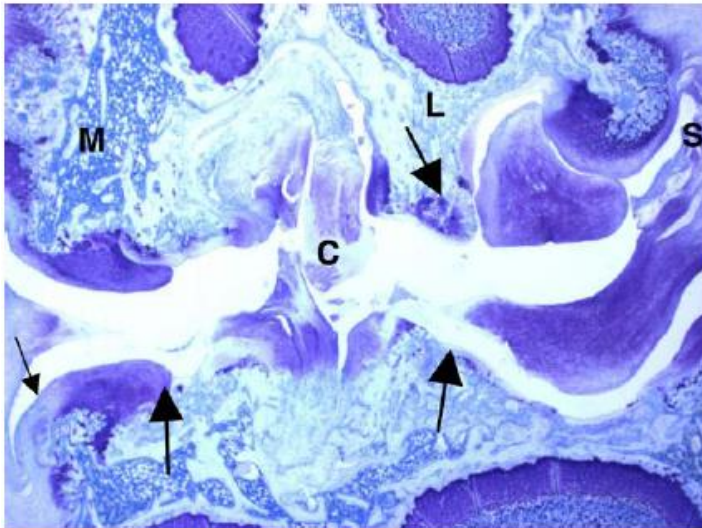

1. Knee from an animal treated with compound E has severe loss of cartilage on all four surfaces, mild subacute synovitis with fibrosis, and a very large osteophyte. M and L identify medial and lateral aspects of the joint. C identifies cruciates. S identifies synovium. Large arrows identify representative affected cartilage surfaces; small arrow identifies osteophyte.

2. Grp 6, Cmpd E, An 11, 16x.

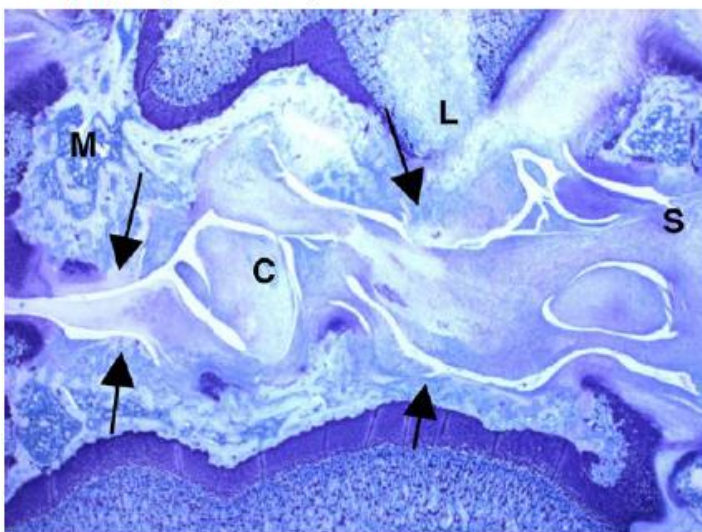

2. Knee from an animal treated with compound E has severe loss of cartilage on all four surfaces, mild subacute synovitis with fibrosis, and a large osteophyte. M and L identify medial and lateral aspects of the joint. C identifies cruciates. S identifies synovium. Large arrows identify representative affected cartilage surfaces.

3. Grp 6, Cmpd E, An 22, 16x.

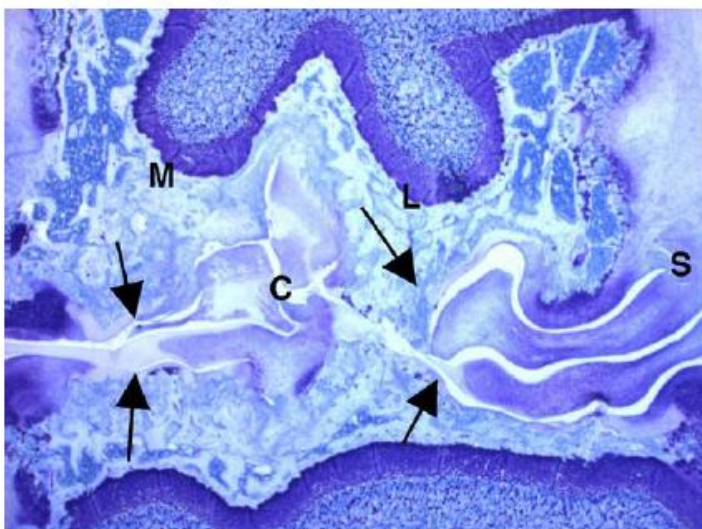

3. Knee from an animal treated with compound E has severe loss of cartilage on all four surfaces, mild subacute synovitis with fibrosis, and a large osteophyte. M and L identify medial and lateral aspects of the joint. C identifies cruciates. S identifies synovium. Large arrows identify representative affected cartilage surfaces.

1. Grp 7, Cmpd F, An 14, 16x.

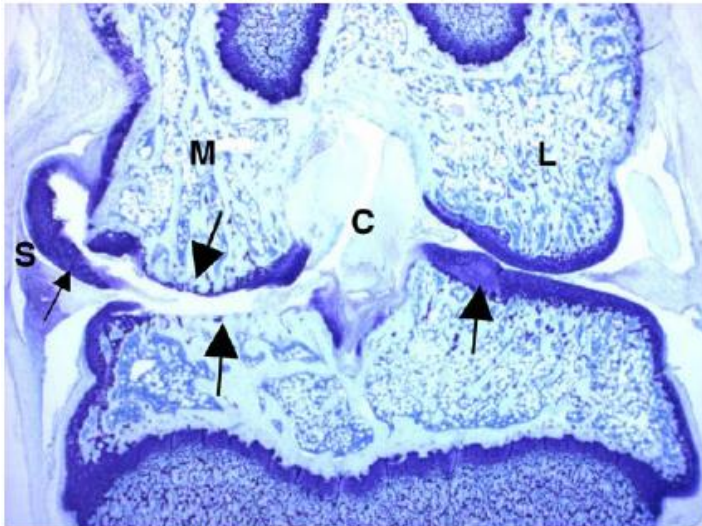

1. Knee from an animal treated with compound F has loss of cartilage on three surfaces, minimal subacute synovitis, and a large osteophyte. M and L identify medial and lateral aspects of the joint. C identifies cruciates. S identifies synovium. Large arrows identify representative affected cartilage surfaces; small arrow identifies osteophyte.

2. Grp 7, Cmpd F, An 29, 16x.

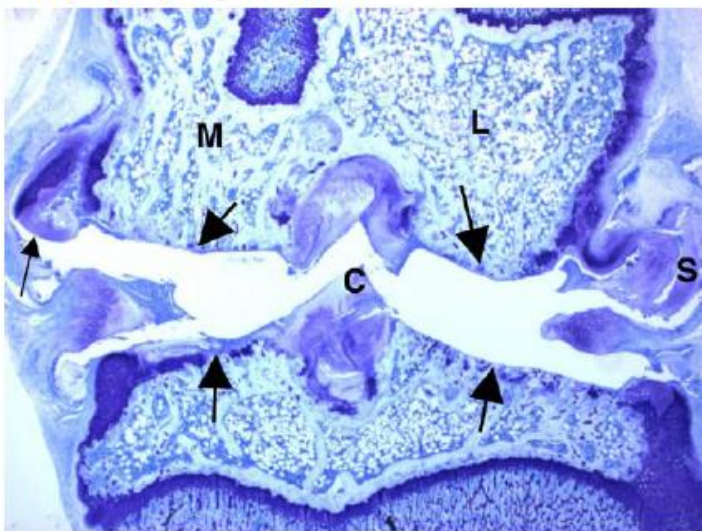

2. Knee from an animal treated with compound F has total loss of cartilage on all four surfaces, severe subacute synovitis, and a large osteophyte. M and L identify medial and lateral aspects of the joint. C identifies cruciates. S identifies synovium. Large arrows identify representative affected cartilage surfaces; small arrow identifies osteophyte.

3. Grp 7, Cmpd F, An 45, 16x.

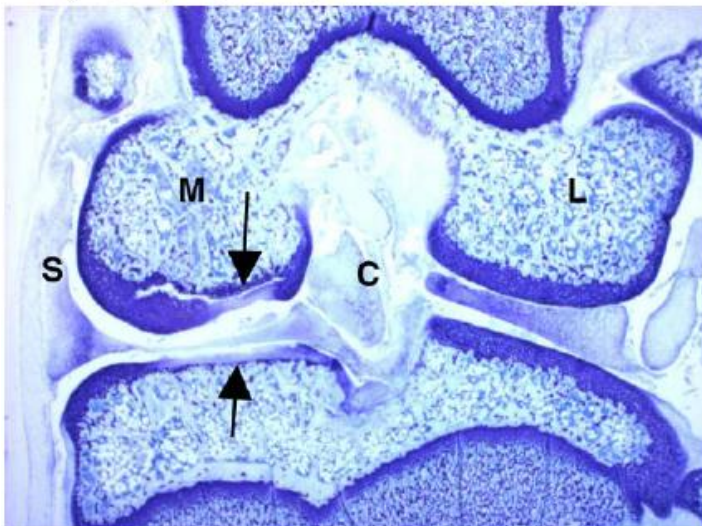

3. Knee from an animal treated with compound F has loss of cartilage on all four surfaces and minimal subacute synovitis. M and L identify medial and lateral aspects of the joint. C identifies cruciates. S identifies synovium. Large arrows identify representative affected cartilage surfaces.



1. Grp 8, Clonidine, An 1, 16x.

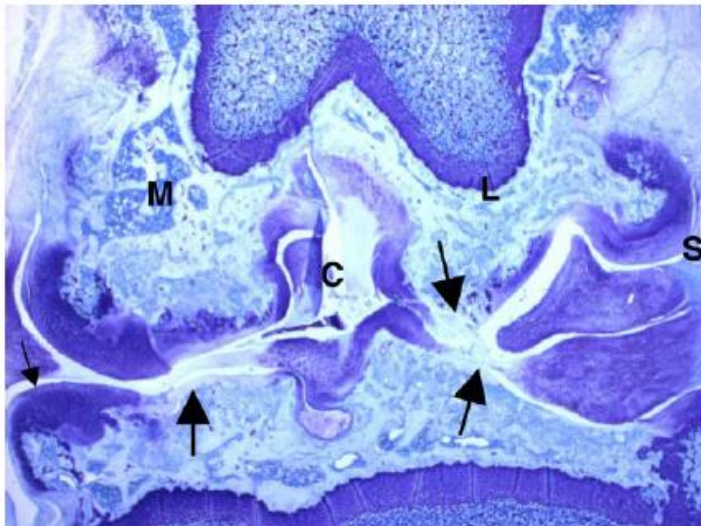

1. Knee from an animal treated with Clonidine has loss of cartilage on all four surfaces, mild subacute synovitis with fibrosis, and a very large osteophyte. M and L identify medial and lateral aspects of the joint. C identifies cruciates. S identifies synovium. Large arrows identify representative affected cartilage surfaces; small arrow identifies osteophyte.

2. Grp 8, Clonidine, An 12, 16x.

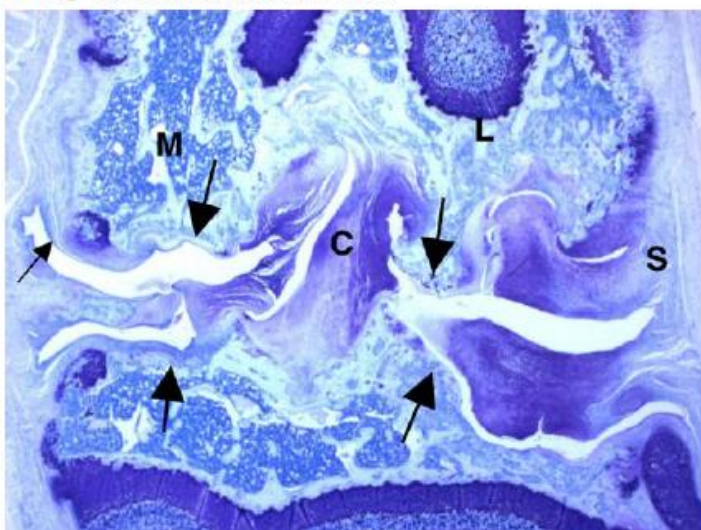

2. Knee from an animal treated with Clonidine has severe loss of cartilage on all four surfaces, mild subacute synovitis, and a large osteophyte. M and L identify medial and lateral aspects of the joint. C identifies cruciates. S identifies synovium. Large arrows identify representative affected cartilage surfaces; small arrow identifies osteophyte.

3. Grp 8, Clonidine, An 18, 16x.

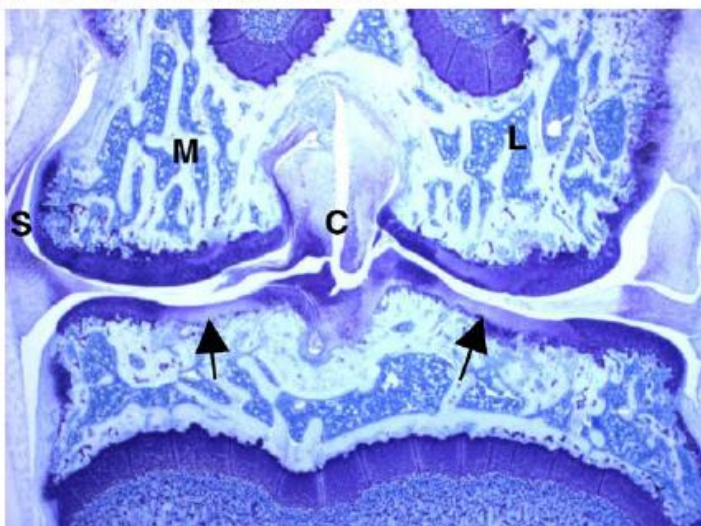

3. Knee from an animal treated with Clonidine has loss of cartilage on all four surfaces and minimal subacute synovitis. M and L identify medial and lateral aspects of the joint. C identifies cruciates. S identifies synovium. Large arrows identify representative affected cartilage surfaces.

## **MMT/MCLT Model Functional Assessment**

Using the MMT/MCLT model, a number of the same agents were tested via systemic delivery and using incapacitance /weight bearing as a measure of pain.

### **MMT/MCLT Trial 1: Weight Bearing Results**

In the first MMT/MCLT trial morphine, Tacrolimus, Fluocinolone, Clonidine, Alendronate, Curcumin, and Withaferin were tested. Alendronate was used as a control for bone degeneration, and Withaferin was added as a nutraceutical which showed promise in in vitro testing.

All animals resumed weight bearing upon recovery from anesthesia after surgery and there was no evidence of excessive post-operative swelling indicative of joint infection. Animals given Tacrolimus (both doses) had blood in the stool from day 7 to study termination. Animals in all IP-dosed compound treatment groups except for the Alendronate group gained significantly less weight over the course of the study than the Saline vehicle controls. Effects on body weight were dose responsive for Tacrolimus and Fluocinolone, with both high doses resulting in approximately 85% less weight gain and the low doses showing approximately 60% less weight gain. Effects on weight bearing scores are discussed below.

#### **1) Morphine**

At pre-treatment baseline on day 7, rats to be given Saline or Morphine had significant right to left weight bearing difference (favoring more weight on the left). Significance was also seen in the Saline group throughout the remainder of the study and in the Morphine group throughout the remainder of day 7. The baseline measure of right vs. left was significantly different for the Morphine group on day 21. Left/right weight distribution differences in Morphine-treated rats on days 7 and 14 decreased (toward the right) to the greatest degree at one hour post dose, and returned to baseline levels by twenty-four hours post dose. They were also observed to be sedated by treatment during the one-hour post dose testing. On day 21, Morphine-treated rats leaned progressively more toward the right leg from baseline to five hours post-dose, then returned to baseline levels at twenty-four hours. The one and three hour time points were also not significantly different between left and right.

#### **2) Tacrolimus**

At pre-treatment baseline on day 7, rats to be given Tacrolimus (0.3 or 0.6 mg/kg i.p.daily) had similar and significant right to left weight bearing differences (favoring more weight on the left) compared to the vehicle control rats. The difference in hind paw weight distribution was very close to the Saline vehicle controls at this time point. At one hour post treatment, rats given 0.3 mg/kg of Tacrolimus had similar weight bearing values to those observed at baseline, while rats given 0.6 mg/kg favored the left leg to a lesser degree, similar to the Morphine controls. At the remaining day 7 time points (3, 5, and 24 hours), rats given 0.3 mg/kg had left/right weight differences that dropped to less than half of the one hour value at three hours, then returned to the baseline level by twenty-four hours. Rats given 0.6 mg/kg Tacrolimus were similar to the Saline vehicle controls at all three time points. Effects of the 0.6 mg/kg dose were comparable to Morphine. The force exerted on the right leg expressed as a percentage of the total hind leg force showed similar results. At no time point was the data significantly different from the baseline.

At pre-treatment baseline and one hour post-dose on day 14, differences in force exerted on the left and right legs of rats to be given Tacrolimus were not significant, although they still leaned to the left. Left/right distribution was similar to Morphine controls and considerably reduced (toward the right) compared to the vehicle controls. The same was true for the percentage of the total hind leg force on the right leg. At three hours post dose, the 0.6 mg/kg group bore significantly less weight on the right leg than the left, but differences at five and twenty-four hours were not significant. Left/right distribution for both doses was similar to the Morphine controls at three, five, and twenty-four hours, with the exception of the high dose at three hours, which was increased (toward the left) even above the Saline controls. At no time point was the data significantly different from the baseline. At baseline on day 21, differences in force exerted on the left and right legs of rats to be given 0.6 mg/kg of Tacrolimus were significant. This was also true at five hours. Left/right distribution was similar to baseline at all time points except for the three hour, at which point the low (0.3 mg/kg) dose animals leaned slightly to the right. The percentage of total hind leg force on the right leg showed similar results. At no time point was the data significantly different from the baseline.

### **3) Fluocinolone**

On day 7, rats given Fluocinolone (5 or 10 ug/kg i.p. daily) placed more weight on their left legs than their rights (with sporadic exceptions). This difference was significant for the low dose group at one hour. Left/right distribution and the percentage of weight on the right leg were generally improved (toward the right) compared to the Morphine and Saline controls, as well as the Tacrolimus groups. There was no discernable pattern to the change in weight bearing over the course of the day, and at no time point was the data significantly different from the baseline. On day 14, rats given Fluocinolone (5 or 10 ug/kg i.p. daily) placed more weight on their left legs than their rights (with sporadic exceptions). This difference was significant for the low dose group at five and twenty-four hours. Left/right distribution and the percentage of weight on the right leg were generally improved (toward the right) compared to the Saline controls, and were frequently comparable to the morphine controls. There was no discernable pattern to the change in weight bearing over the course of the day, and at no time point was the data significantly different from the baseline. On day 21, rats given 10 ug Fluocinolone placed significantly more weight on their left legs than their rights at all time points except for three hours. The 5 ug group leaned non-significantly to the left. Left/right distribution was very slightly improved (toward the right) compared to the Saline vehicle controls, with benefit in the high dose group peaking at three hours post-dose before returning to near baseline levels by twenty-four hours. The percentage of hind paw force on the right leg was comparable to that of the vehicle controls. At no time point was the data significantly different from the baseline.

### **4) Clonidine and Alendronate**

On day 7, animals treated with Clonidine (100 ug/kg s.c. daily) or Alendronate (30 ug i.p. daily) bore significantly more weight on their left legs at all time points except for one hour post-dose. However, left/right distribution for was improved compared to the Saline controls at all time points except for three hours post-dose. Rats given Clonidine were improved compared to the Morphine controls as well at all time points, while rats given Alendronate were improved at all time points except for one hour post-dose. The percent of total hind leg force on the right leg was comparable to the vehicle controls at most time points, although improvement was seen at one hour (Clonidine) and five hours (both Clonidine and Alendronate). At no time point was the data significantly

different from the baseline. On day 14, animals treated with Clonidine bore significantly more weight on their left legs at baseline, and animals treated with Alendronate bore significantly more weight on the left at baseline, five hours, and twenty-four hours. Left/right weight distribution for Clonidine improved (toward right) from baseline to three hours (comparable to morphine), then increased (toward the left) to above the baseline and Saline control levels at twenty-four hours.

Animals treated with Alendronate followed a similar pattern, with peak benefit at one hour post-dose. A similar pattern was seen in the percentage of total hind leg force on the right leg. At no time point was the data significantly different from the baseline. On day 21, animals treated with Alendronate bore significantly more weight on their left legs at baseline, three, five, and twenty-four hours. Left/right weight distribution for Clonidine improved (toward right) from baseline to five hours (comparable to Morphine), then increased (toward the left) at twenty-four hours. Alendronate had comparable benefit at one hour, but was otherwise similar to the vehicle controls. A similar pattern was seen in the percentage of total hind leg force on the right leg, although the effect due to Clonidine peaked at three hours. At no time point was the data significantly different from the baseline.

### **5) Curcumin and Withaferin**

On day 7, animals treated with orally dosed 50 mg/kg Curcumin or orally dosed 50 mg/kg Withaferin bore significantly more weight on their left legs at all time points except for one hour post-dose. Left/right weight distribution for animals treated with Curcumin was similar to the Saline controls at all time points except for five hours post-dose, at which time treated animals favored, to a greater degree, more weight on the left. Distribution for animals treated with Withaferin was comparable to that of the Morphine controls. The percentage of total hind leg force on the right leg was comparable to the Saline controls for the Curcumin group and slightly increased at all time points for the Withaferin group. At no time point was the data significantly different from the baseline.

On day 14, animals treated with Withaferin bore significantly more weight on their left legs at baseline and five hours post-dose. Curcumin treated animals bore slightly more weight on their right legs at three and five hours post-dose. Left/right weight distribution for Curcumin treated animals at all post-treatment time points was comparable to Morphine, while left/right distribution for Withaferin treated animals was similar to that of the Saline controls. A similar pattern was seen in the percentage of total hind leg force on the right leg. At no time point was the data significantly different from the baseline.

On day 21, animals treated with Withaferin bore significantly more weight on their left legs at three, five, and twenty-four hours post-dose. Left/right weight distribution at baseline and one hour was comparable to Morphine for both compounds. Animals treated with Curcumin remained similar to Morphine treated animals at three, five, and twenty-four hours, while Withaferin treated animals trended closer to the Saline controls. A similar pattern was seen in the percentage of total hind leg force on the right leg, although differences were less distinct. At no time point was the data significantly different from the baseline.

Below are shown results of incapacitance testing calculated as a ratio of injured to non-injured WB for days 7, 14, and 21 (**Figure 56 A, B, and C**). The average value for baseline is shown as a line (\*:p < .05, 2 tailed, unpaired t-test, versus saline vehicle control).

**Figure 56 - Day 7, 14, and 21 incapacitance results displayed as a ratio of injured to non-injured and compared with baseline control (shown as a line).**

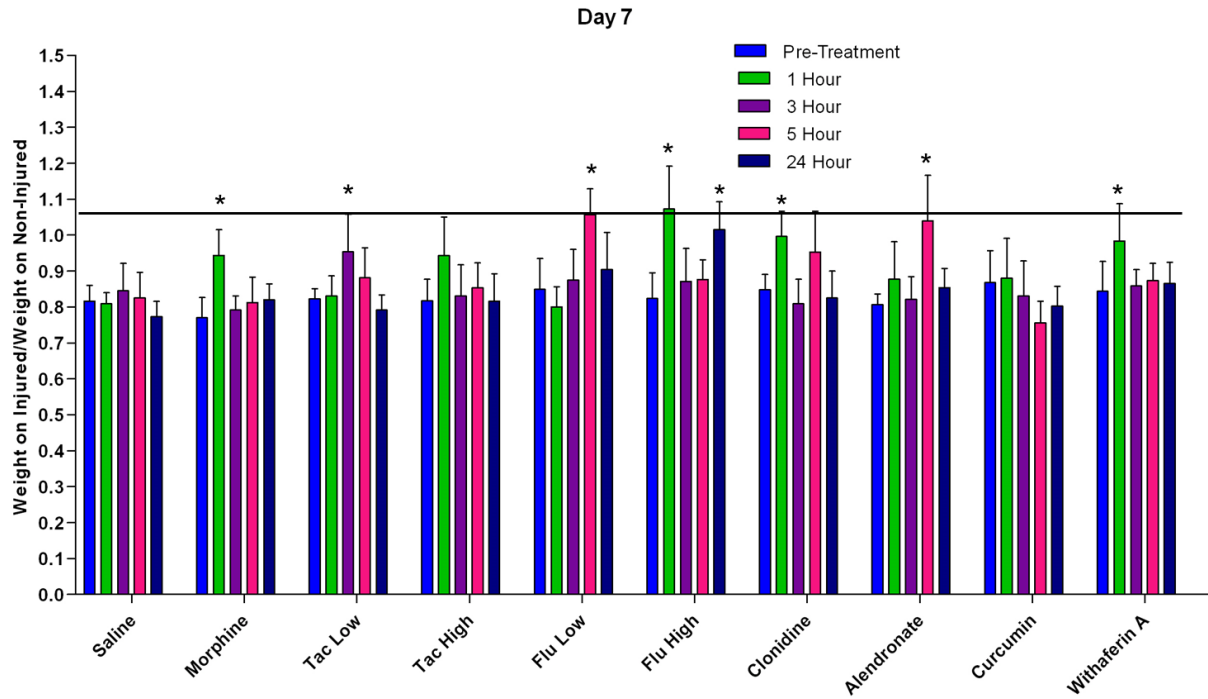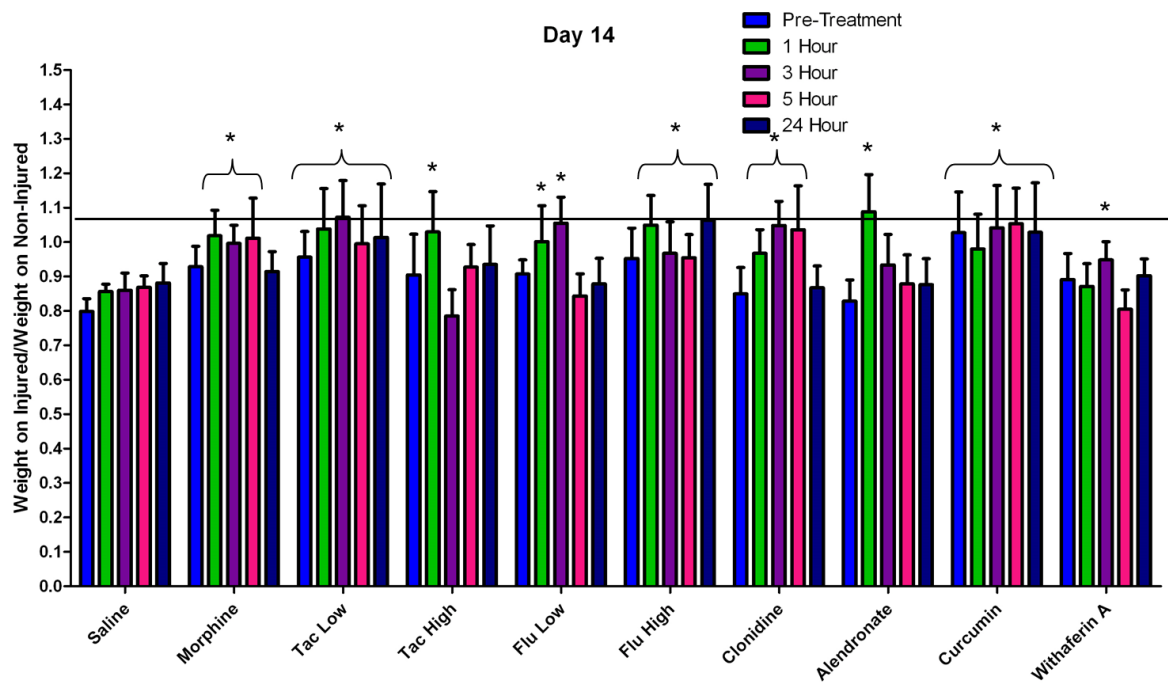

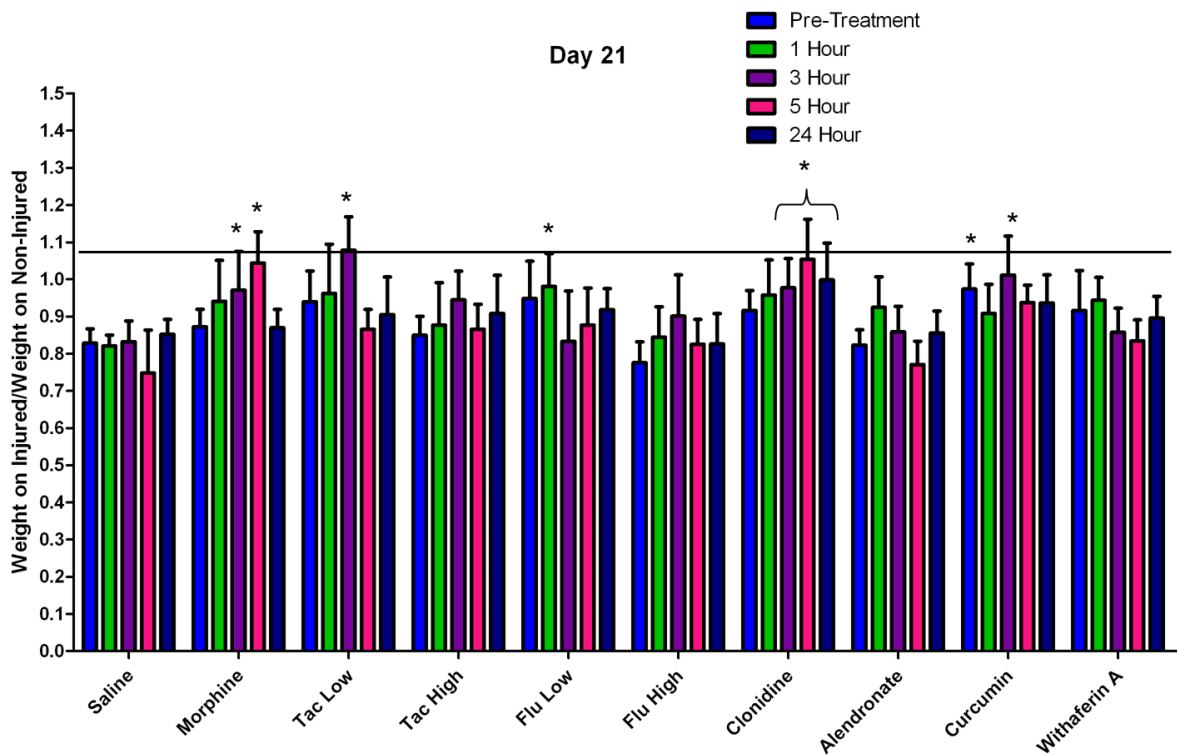

## MMT/MCLT Trial 2: Weight bearing Results

Drugs of continuing interest were tested using intra-articular administration.

All animals resumed weight bearing post-surgery upon recovery from anesthesia and there was no evidence of excessive post-operative swelling indicative of joint infection. There was no significant variation in body weight gain over the course of the study. The animals of every group bore significantly less weight on the injuring right legs as compared to the left at all time points. Weight bearing data is included in the Appendix.

### 1) Saline (Group 1 Appendix)

The Vehicle control animals injected intra-articularly once a week with saline bore 43.8-46.4% of the total hind paw weight on their right legs over the course of the study. There was no pattern to the changes at later time points compared to pre-treatment on days 7 or 14, but on day 21, weight distribution was progressively worse.

### 2) Clonidine (Group 2 Appendix)

Control animals treated with subcutaneous weekly injections of 100 ug/kg Clonidine leaned significantly more on the left leg than the right (presumably due to increased pain) compared to the vehicle controls on day 21 at the pre-treatment time point. This was true of both the right/left ratio and the percent of hind paw weight on the right leg. There were no other significant differences in left/right weight bearing compared to the controls, but the percentage of the total body weight carried on the hind legs was significantly increased on days 7 (3 and 5 hr), 14 (5 hr), and 21 (3 and 5 hr). This parameter was significantly decreased at pre-treatment on day 21.

### 3) IA Clonidine (Group 3 Appendix)

Animals treated with intra-articular (IA) weekly injections of Clonidine (4.5 ug) showed significantly more discomfort as measured by weight bearing when compared with the vehicle controls at the 5 hour time point on days 7 and 14 and the 3 hour time point on day 21. This was evident in both the right/left ratio and the percent of hind paw weight on the right leg. There were no other significant differences in left/right weight bearing compared to the controls, but the percentage of the total body weight carried on the hind legs was significantly increased on days 7 (1 hr) and 21 (1 hr). This parameter was significantly decreased at pre-treatment on day 14 (1 hr). Weight bearing on the left leg at 1, 3, and 5 hours was generally greater than at pre-treatment.

#### **4) IA Triamcinolone Hexacetonide (TH) (Group 4 Appendix)**

Animals treated with TH IA injections once a week (0.15 mg, i.a.) bore significantly less weight on the surgical leg at the three hour time point on day 21. This was evident in both the right/left ratio and the percent of hind paw weight on the right leg. There were no other significant differences in left/right weight bearing compared to the controls, but the percentage of the total body weight carried on the hind legs was significantly increased on days 14 (1 and 5 hrs) and 21 (1 and 5 hrs). Weight bearing on the right leg at 1, 3, and 5 hours was generally less than at pre-treatment.

#### **5) IA Tacrolimus (Group 5 & 6 Appendix)**

Animals treated with 15 ng IA Tacrolimus once a week had significantly increased pain at the pre-treatment time point on day 21 based on the ratio of weight on the right leg vs. the left. This data was not significant when expressed as a percentage of the total hind leg force. Shifting of weight from the injured paw to the left leg tended to increase at the later time points after injection of the 15 ng Tacrolimus as compared to pre-treatment, except on day 14. In contrast, this was a significant shift in animals treated with 30 ng IA Tacrolimus once a week at the five hour time point on day 7 and the three hour time point on day 21. This was evident in both the right/left ratio and the percent of hind paw weight on the right leg. There were no other significant differences in left/right weight bearing compared to the controls. Presumed pain as indicated by this shift in weight bearing at 1, 3, and 5 hours was greater than at pre-treatment.

#### **6) IA Fluocinolone (Group 7 Appendix)**

Animals treated with 15 ng IA Fluocinolone had significantly increased favoring of the right paw at the three hour time point on day 14. This was evident in both the right/left ratio and the percent of hind paw weight on the right leg. There were no other significant differences in left/right weight bearing compared to the controls, but the percentage of the total body weight carried on the hind legs was significantly increased on day 21 (pre-treatment). The change in weight bearing toward greater use of the left paw at 1, 3, and 5 hours was greater than at pre-treatment.

#### **7) IA Curcumin (Group 8 Appendix)**

Animals treated with 30 µg IA Curcumin once a week had significantly increased changes in weight bearing indicating discomfort at the three and five hour time points on days 14 and 21. This was evident in both the right/left ratio and the percent of hind paw weight on the right leg. There were no other significant differences in left/right weight bearing compared to the controls, but the percentage of the total body weight carried on the hind legs was significantly increased on day 14 (3 and 5 hrs). Pain at 1, 3, and 5 hours was generally greater than at pre-treatment.

## MMT/MCLT Model Histopathology Results

All studies completed at Bolder BioPATH included a complete analysis of the joint histopathology for each test animal including joint space and synovial tissue.

### **MMT/MCLT Trial 1: Representative Images**

Shown in **Figure 57** below are representative images (50x) from animals of treatment groups in the first MMT/MCLT Trial with systemic delivery of therapeutic agents. Marrow is depicted by “M” and the region of cartilage damage is depicted with an arrow. In these higher power images the osteophytes are out of view. A. Saline, B. Morphine, C. Tacrolimus (0.3 mg/kg), D. Tacrolimus (0.6 mg/kg), E. Fluocinolone ((0.005 mg/kg), F. Fluocinolone (0.010 mg/kg), G. Clonidine (0.1 mg/kg), H. Alendronate (10 µg/kg), I. Curcumin (50 mg/kg), J. Withaferin (50 mg/kg).

**Figure 57. Representative images from Trial 1 MMT/MCLT**

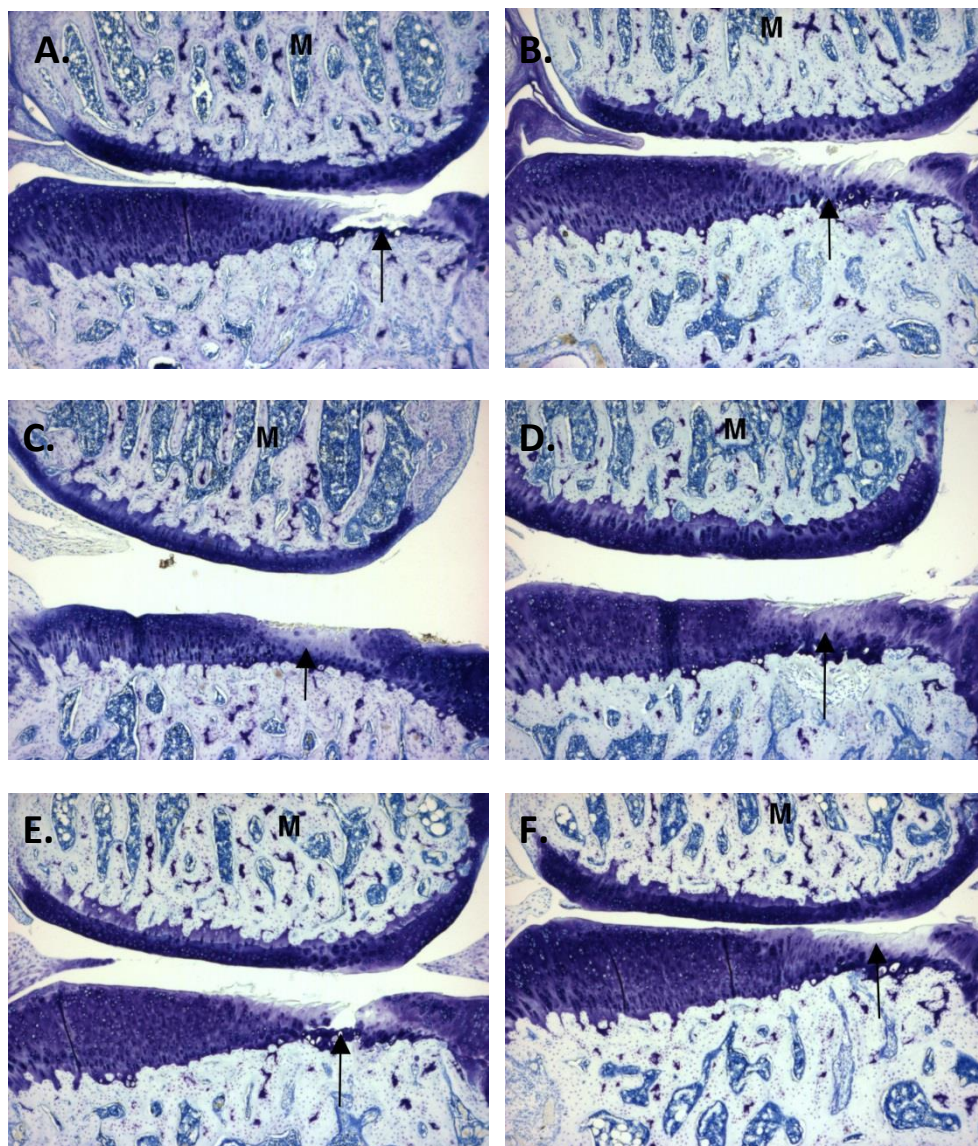



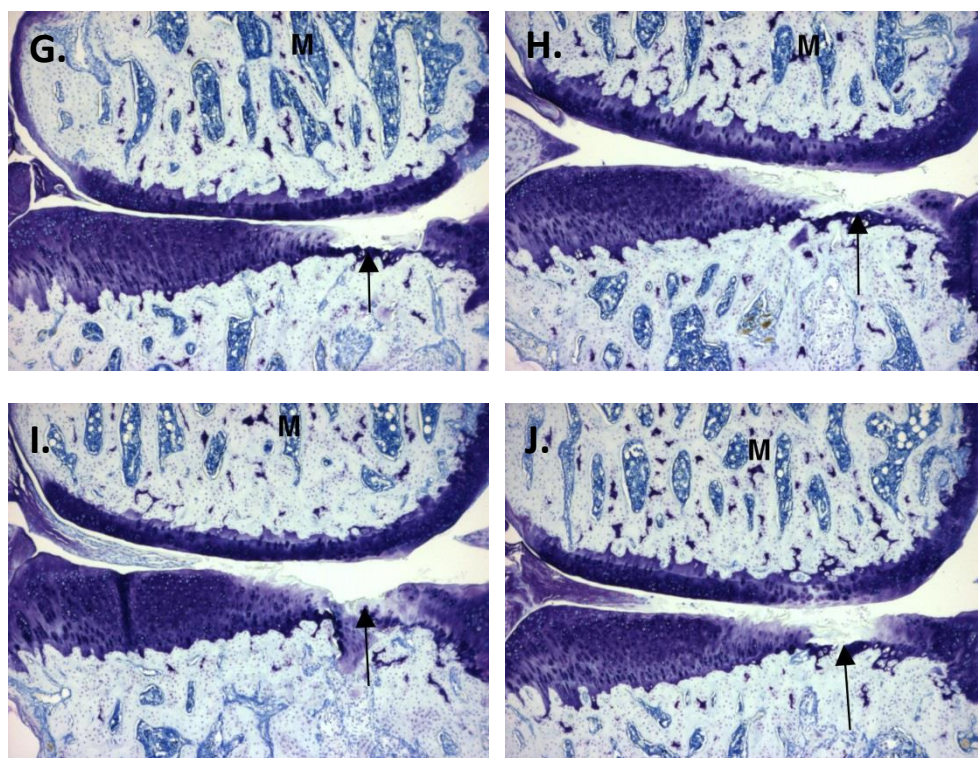

## MMT/MCLT Trial 1: Semi-quantitative Analysis of Histological Sections

### 1) Vehicle (Saline)

Animals treated with vehicle alone had tibial cartilage degeneration that was most severe in the outer 2/3 of the tibial plateau and less severe in the inner 1/3. Osteophytes were present in all animals and ranged from large to very large, with a mean measurement of 513  $\mu\text{m}$ . Femoral cartilage degeneration was seen in all animals and ranged from minimal to marked when present. The mean total joint score for this group was 12.09.

**Table 36.** Histopathology of MMT/MCLT animals treated with vehicle alone (Group 1; Systemic delivery)

| Treatment Group<br>Animal # | Knee | Medial Tibial<br>Cartilage Degeneration Score* |                     |                    |                    | Tibial Cartilage<br>Degeneration<br>Width |                             | Depth Ratio<br>Any Matrix<br>Change# |           | Medial Tibial<br>Osteophyte |                              | Medial<br>Femur<br>Cartilage<br>Degeneration<br>Score* | Bone<br>Score | Total<br>Joint<br>Score<br>w/o<br>Femur | Total<br>Joint<br>Score |
|-----------------------------|------|------------------------------------------------|---------------------|--------------------|--------------------|-------------------------------------------|-----------------------------|--------------------------------------|-----------|-----------------------------|------------------------------|--------------------------------------------------------|---------------|-----------------------------------------|-------------------------|
|                             |      | 3 Zone<br>total                                | Zone 1<br>(Outside) | Zone 2<br>(Middle) | Zone 3<br>(Inside) | Total<br>( $\mu\text{m}$ )**              | Sig<br>( $\mu\text{m}$ )*** | Mean                                 | Zone<br>2 | Score<br>##                 | Measure<br>( $\mu\text{m}$ ) |                                                        |               |                                         |                         |
|                             |      |                                                |                     |                    |                    |                                           |                             |                                      |           |                             |                              |                                                        |               |                                         |                         |
| 01<br>Vehicle               |      |                                                |                     |                    |                    |                                           |                             |                                      |           |                             |                              |                                                        |               |                                         |                         |
| 1                           | R    | 7.00                                           | 4.67                | 2.33               | 0.00               | 1433                                      | 783                         | 0.39                                 | 0.23      | 3.67                        | 467                          | 2.33                                                   | 3.00          | 10.67                                   | 13.00                   |
| 2                           | R    | 7.00                                           | 5.00                | 2.00               | 0.00               | 1333                                      | 767                         | 0.42                                 | 0.27      | 4.00                        | 553                          | 2.67                                                   | 3.00          | 11.00                                   | 13.67                   |
| 3                           | R    | 7.00                                           | 4.67                | 2.33               | 0.00               | 1100                                      | 767                         | 0.35                                 | 0.16      | 5.00                        | 600                          | 1.33                                                   | 4.00          | 12.00                                   | 13.33                   |
| 4                           | R    | 6.00                                           | 4.33                | 1.67               | 0.00               | 1100                                      | 667                         | 0.30                                 | 0.06      | 3.67                        | 480                          | 1.00                                                   | 3.00          | 9.67                                    | 10.67                   |
| 5                           | R    | 5.67                                           | 3.67                | 2.00               | 0.00               | 1333                                      | 633                         | 0.29                                 | 0.06      | 4.67                        | 610                          | 2.00                                                   | 4.00          | 10.33                                   | 12.33                   |
| 6                           | R    | 8.00                                           | 5.00                | 3.00               | 0.00               | 1367                                      | 900                         | 0.45                                 | 0.34      | 3.00                        | 440                          | 3.33                                                   | 3.00          | 11.00                                   | 14.33                   |
| 7                           | R    | 6.67                                           | 3.67                | 2.67               | 0.33               | 1333                                      | 700                         | 0.34                                 | 0.29      | 4.33                        | 540                          | 1.00                                                   | 3.00          | 11.00                                   | 12.00                   |
| 8                           | R    | 5.00                                           | 3.33                | 1.67               | 0.00               | 1500                                      | 600                         | 0.32                                 | 0.06      | 3.00                        | 413                          | 1.00                                                   | 3.00          | 8.00                                    | 9.00                    |
| Mean                        |      | 6.54                                           | 4.29                | 2.21               | 0.04               | 1312.50                                   | 727.08                      | 0.36                                 | 0.18      | 3.92                        | 512.92                       | 1.83                                                   | 3.25          | 10.46                                   | 12.29                   |
| SE                          |      | 0.33                                           | 0.23                | 0.17               | 0.04               | 50.76                                     | 34.21                       | 0.02                                 | 0.04      | 0.26                        | 25.99                        | 0.31                                                   | 0.16          | 0.42                                    | 0.62                    |
| %                           |      | 0%                                             | 0%                  | 0%                 | 0%                 | 0%                                        | 0%                          | 0%                                   | 0%        | 0%                          | 0%                           | 0%                                                     | 0%            | 0%                                      | 0%                      |

### 2) Morphine

Animals treated with Morphine were similar to the controls for all general pathology parameters. Collagen degeneration widths were not significantly affected, nor were cartilage matrix areas. Mean growth plate and MCL thickness measurements were identical to the controls.

**Table 37. Histopathology of MMT/MCLT animals treated with morphine (Group 2; Systemic delivery)**

| Treatment Group<br>Animal #  | Knee | Medial Tibial<br>Cartilage Degeneration Score* |                     |                    |                    | Tibial Cartilage<br>Degeneration<br>Width |                | Depth Ratio<br>Any Matrix<br>Change# |              | Medial Tibial<br>Osteophyte |                 | Medial<br>Femur<br>Cartilage<br>Degeneration<br>Score* | Bone<br>Score | Total<br>Joint<br>Score<br>w/o<br>Femur | Total<br>Joint<br>Score |
|------------------------------|------|------------------------------------------------|---------------------|--------------------|--------------------|-------------------------------------------|----------------|--------------------------------------|--------------|-----------------------------|-----------------|--------------------------------------------------------|---------------|-----------------------------------------|-------------------------|
|                              |      | 3 Zone<br>total                                | Zone 1<br>(Outside) | Zone 2<br>(Middle) | Zone 3<br>(Inside) | Total<br>(µm)**                           | Sig<br>(µm)*** | Mean                                 | Zone<br>2    | Score<br>##                 | Measure<br>(µm) |                                                        |               |                                         |                         |
|                              |      |                                                |                     |                    |                    |                                           |                |                                      |              |                             |                 |                                                        |               |                                         |                         |
| <b>02</b><br><b>Morphine</b> |      |                                                |                     |                    |                    |                                           |                |                                      |              |                             |                 |                                                        |               |                                         |                         |
| 1                            | R    | 6.33                                           | 4.00                | 2.33               | 0.00               | 1233                                      | 733            | 0.38                                 | 0.17         | 4.33                        | 587             | 3.00                                                   | 3.00          | 10.67                                   | 13.67                   |
| 2                            | R    | 5.33                                           | 3.67                | 1.67               | 0.00               | 1367                                      | 600            | 0.26                                 | 0.01         | 4.00                        | 540             | 1.33                                                   | 3.00          | 9.33                                    | 10.67                   |
| 3                            | R    | 7.00                                           | 4.67                | 2.33               | 0.00               | 1333                                      | 767            | 0.43                                 | 0.29         | 5.00                        | 663             | 1.33                                                   | 4.00          | 12.00                                   | 13.33                   |
| 4                            | R    | 6.00                                           | 4.00                | 2.00               | 0.00               | 1133                                      | 667            | 0.32                                 | 0.06         | 4.00                        | 527             | 1.33                                                   | 3.00          | 10.00                                   | 11.33                   |
| 5                            | R    | 7.67                                           | 5.00                | 2.67               | 0.00               | 1300                                      | 767            | 0.40                                 | 0.24         | 5.00                        | 600             | 2.33                                                   | 4.00          | 12.67                                   | 15.00                   |
| 6                            | R    | 6.67                                           | 4.67                | 2.00               | 0.00               | 1033                                      | 700            | 0.32                                 | 0.00         | 4.00                        | 500             | 1.33                                                   | 4.00          | 10.67                                   | 12.00                   |
| 7                            | R    | 6.00                                           | 4.67                | 1.33               | 0.00               | 1200                                      | 600            | 0.35                                 | 0.06         | 5.00                        | 647             | 6.67                                                   | 4.00          | 11.00                                   | 17.67                   |
| 8                            | R    | 4.67                                           | 3.33                | 1.00               | 0.33               | 1633                                      | 500            | 0.27                                 | 0.02         | 4.00                        | 527             | 1.33                                                   | 4.00          | 8.67                                    | 10.00                   |
| <b>Mean</b>                  |      | <b>6.21</b>                                    | <b>4.25</b>         | <b>1.92</b>        | <b>0.04</b>        | <b>1279.17</b>                            | <b>666.67</b>  | <b>0.34</b>                          | <b>0.11</b>  | <b>4.42</b>                 | <b>573.75</b>   | <b>2.33</b>                                            | <b>3.63</b>   | <b>10.63</b>                            | <b>12.96</b>            |
| <b>SE</b>                    |      | <b>0.33</b>                                    | <b>0.21</b>         | <b>0.20</b>        | <b>0.04</b>        | <b>63.60</b>                              | <b>33.33</b>   | <b>0.02</b>                          | <b>0.04</b>  | <b>0.18</b>                 | <b>21.22</b>    | <b>0.66</b>                                            | <b>0.18</b>   | <b>0.46</b>                             | <b>0.89</b>             |
| <b>ttest to G1</b>           |      | <b>0.491</b>                                   | <b>0.895</b>        | <b>0.276</b>       | <b>1.000</b>       | <b>0.688</b>                              | <b>0.227</b>   | <b>0.550</b>                         | <b>0.200</b> | <b>0.131</b>                | <b>0.091</b>    | <b>0.504</b>                                           | <b>0.149</b>  | <b>0.795</b>                            | <b>0.548</b>            |
| <b>%</b>                     |      | <b>5%</b>                                      | <b>1%</b>           | <b>13%</b>         | <b>0%</b>          | <b>3%</b>                                 | <b>8%</b>      | <b>5%</b>                            | <b>42%</b>   | <b>-13%</b>                 | <b>-12%</b>     | <b>-27%</b>                                            | <b>-12%</b>   | <b>-2%</b>                              | <b>-5%</b>              |

\*Cartilage degeneration score=depth (0-5) for each 1/3 then summed (mean of 3 step section)  
 \*\*Width of any cartilage lesion (mean of 3 step section)  
 \*\*\*Width of cartilage degeneration extending >50% of total thickness (mean of 3 step section)  
 #Mean Lesion depth in µm vs depth to tidemark in center of zone in the Tibial plateau (mean of 3 step section)  
 ##Osteophyte scores 1=small up to 299 µm, 2=medium 300-399 µm, 3=large 400-499 µm, 4=very large 500-599 µm, 5=very large ≥600 µm

### 3) Tacrolimus (0.3 mg/kg, i.p.)

Animals treated IP with 0.3 mg/kg of Tacrolimus had significantly decreased cartilage degeneration scores (zones 1, 2, and the 3-zone total) in the medial tibia (35 %). The width of significant cartilage degeneration was significantly decreased (39%), as were the mean (29%) and zone 2 (59%) depth ratio of any matrix change, osteophyte scores (39%) and measurements (28%), femoral cartilage degeneration scores (73%), and the total joint score both with (42%) and without (37%) the femur. Subchondral bone scores were reduced non-significantly by 19%. The widths of severe (97%) and moderate (91%) collagen degeneration were significantly decreased, resulting in significant decreases to combined widths of severe+marked+moderate+mild (33%), severe+marked+moderate (88%), and severe+marked (86%) degeneration. The areas of viable (26%) and any (59%) cartilage matrix were significantly increased. Growth plate thickness was significantly decreased compared to the vehicle controls. Five animals had decreased metaphyseal/diaphyseal new bone.

**Table 38. Histopathology of MMT/MCLT animals treated with Tacrolimus (Group 3; Systemic low dose)**

| Treatment Group<br>Animal #       | Knee | Medial Tibial<br>Cartilage Degeneration Score* |                     |                    |                    | Tibial Cartilage<br>Degeneration<br>Width |                | Depth Ratio<br>Any Matrix<br>Change# |              | Medial Tibial<br>Osteophyte |                 | Medial<br>Femur<br>Cartilage<br>Degeneration<br>Score* | Bone<br>Score | Total<br>Joint<br>Score<br>w/o<br>Femur | Total<br>Joint<br>Score |
|-----------------------------------|------|------------------------------------------------|---------------------|--------------------|--------------------|-------------------------------------------|----------------|--------------------------------------|--------------|-----------------------------|-----------------|--------------------------------------------------------|---------------|-----------------------------------------|-------------------------|
|                                   |      | 3 Zone<br>total                                | Zone 1<br>(Outside) | Zone 2<br>(Middle) | Zone 3<br>(Inside) | Total<br>(µm)**                           | Sig<br>(µm)*** | Mean                                 | Zone<br>2    | Score<br>##                 | Measure<br>(µm) |                                                        |               |                                         |                         |
|                                   |      |                                                |                     |                    |                    |                                           |                |                                      |              |                             |                 |                                                        |               |                                         |                         |
| <b>03</b><br><b>A1 0.3 mg/ kg</b> |      |                                                |                     |                    |                    |                                           |                |                                      |              |                             |                 |                                                        |               |                                         |                         |
| 1                                 | R    | 4.00                                           | 2.33                | 1.67               | 0.00               | 1167                                      | 433            | 0.19                                 | 0.12         | 3.00                        | 413             | 0.33                                                   | 2.00          | 7.00                                    | 7.33                    |
| 2                                 | R    | 4.67                                           | 3.33                | 1.33               | 0.00               | 1300                                      | 567            | 0.30                                 | 0.02         | 3.00                        | 413             | 1.00                                                   | 2.00          | 7.67                                    | 8.67                    |
| 3                                 | R    | 3.33                                           | 2.33                | 1.00               | 0.00               | 1067                                      | 333            | 0.21                                 | 0.10         | 3.00                        | 427             | 0.33                                                   | 4.00          | 6.33                                    | 6.67                    |
| 4                                 | R    | 4.33                                           | 2.67                | 1.67               | 0.00               | 1400                                      | 500            | 0.28                                 | 0.07         | 1.00                        | 280             | 0.00                                                   | 3.00          | 5.33                                    | 5.33                    |
| 5                                 | R    | 6.67                                           | 4.00                | 2.67               | 0.00               | 1333                                      | 733            | 0.37                                 | 0.23         | 2.33                        | 353             | 1.00                                                   | 2.00          | 9.00                                    | 10.00                   |
| 6                                 | R    | 4.67                                           | 2.67                | 2.00               | 0.00               | 1033                                      | 567            | 0.26                                 | 0.00         | 3.00                        | 450             | 0.33                                                   | 4.00          | 7.67                                    | 8.00                    |
| 7                                 | R    | 3.67                                           | 3.00                | 0.67               | 0.00               | 867                                       | 300            | 0.33                                 | 0.01         | 2.67                        | 390             | 1.00                                                   | 2.00          | 6.33                                    | 7.33                    |
| 8                                 | R    | 2.67                                           | 1.67                | 1.00               | 0.00               | 933                                       | 100            | 0.12                                 | 0.06         | 1.00                        | 240             | 0.00                                                   | 2.00          | 3.67                                    | 3.67                    |
| <b>Mean</b>                       |      | <b>4.25</b>                                    | <b>2.75</b>         | <b>1.50</b>        | <b>0.00</b>        | <b>1137.50</b>                            | <b>441.67</b>  | <b>0.26</b>                          | <b>0.07</b>  | <b>2.38</b>                 | <b>370.83</b>   | <b>0.50</b>                                            | <b>2.63</b>   | <b>6.63</b>                             | <b>7.13</b>             |
| <b>SE</b>                         |      | <b>0.42</b>                                    | <b>0.25</b>         | <b>0.23</b>        | <b>0.00</b>        | <b>68.84</b>                              | <b>69.22</b>   | <b>0.03</b>                          | <b>0.03</b>  | <b>0.31</b>                 | <b>26.40</b>    | <b>0.15</b>                                            | <b>0.32</b>   | <b>0.58</b>                             | <b>0.69</b>             |
| <b>ttest to G1</b>                |      | <b>0.001</b>                                   | <b>0.000</b>        | <b>0.025</b>       | <b>0.334</b>       | <b>0.060</b>                              | <b>0.002</b>   | <b>0.011</b>                         | <b>0.042</b> | <b>0.002</b>                | <b>0.002</b>    | <b>0.002</b>                                           | <b>0.107</b>  | <b>0.000</b>                            | <b>0.000</b>            |
| <b>%</b>                          |      | <b>35%</b>                                     | <b>36%</b>          | <b>32%</b>         | <b>100%</b>        | <b>13%</b>                                | <b>39%</b>     | <b>29%</b>                           | <b>59%</b>   | <b>39%</b>                  | <b>28%</b>      | <b>73%</b>                                             | <b>19%</b>    | <b>37%</b>                              | <b>42%</b>              |

Animals treated IP with 0.6 mg/kg of Tacrolimus daily had significantly decreased cartilage degeneration scores (zones 1, 2, and the 3-zone total) in the medial tibia (45%). The widths of total (28%) and significant (55%) cartilage degeneration were significantly decreased as well, as were the mean (40%) and zone 2 (87%) depth ratio of any matrix change, osteophyte scores (39%) and measurements (28%), femoral cartilage degeneration scores (48%), and the total joint score both with (43%) and without (43%) the femur. The width of normal collagen was significantly increased by 19%. The widths of total (19%), severe (100%) and marked (97%) collagen degeneration were significantly decreased, resulting in significant decreases to combined widths of

severe+marked+moderate+mild (53%), severe+marked+moderate (96%), and severe+marked (99%) degeneration. The areas of viable (33%) and any (69%) cartilage matrix were significantly increased. Growth plate thickness was significantly decreased compared to the vehicle controls. All animals had decreased metaphyseal/diaphyseal new bone.

#### 4) Tacrolimus (0.6 mg/kg, i.p.)

**Table 39.** Histopathology of MMT/MCLT animals treated with Tacrolimus (Group 4; Systemic high dose)

| Treatment Group<br>Animal # | Knee | Medial Tibial<br>Cartilage Degeneration Score* |                     |                    |                    | Tibial Cartilage<br>Degeneration<br>Width |                | Depth Ratio<br>Any Matrix<br>Change# |              | Medial Tibial<br>Osteophyte |                 | Medial<br>Femur<br>Cartilage<br>Degeneration<br>Score* | Bone<br>Score | Total<br>Joint<br>Score<br>w/o<br>Femur | Total<br>Joint<br>Score |
|-----------------------------|------|------------------------------------------------|---------------------|--------------------|--------------------|-------------------------------------------|----------------|--------------------------------------|--------------|-----------------------------|-----------------|--------------------------------------------------------|---------------|-----------------------------------------|-------------------------|
|                             |      | 3 Zone<br>total                                | Zone 1<br>(Outside) | Zone 2<br>(Middle) | Zone 3<br>(Inside) | Total<br>(µm)**                           | Sig<br>(µm)*** | Mean                                 | Zone<br>2    | Score<br>##                 | Measure<br>(µm) |                                                        |               |                                         |                         |
|                             |      |                                                |                     |                    |                    |                                           |                |                                      |              |                             |                 |                                                        |               |                                         |                         |
| <b>04</b><br>A2 0.6 mg/kg   |      |                                                |                     |                    |                    |                                           |                |                                      |              |                             |                 |                                                        |               |                                         |                         |
| 1                           | R    | 2.33                                           | 2.00                | 0.33               | 0.00               | 833                                       | 100            | 0.19                                 | 0.01         | 2.33                        | 353             | 0.00                                                   | 4.00          | 4.67                                    | 4.67                    |
| 2                           | R    | 4.00                                           | 2.33                | 1.67               | 0.00               | 1033                                      | 400            | 0.20                                 | 0.04         | 3.00                        | 460             | 1.00                                                   | 3.00          | 7.00                                    | 8.00                    |
| 3                           | R    | 5.00                                           | 3.33                | 1.67               | 0.00               | 967                                       | 567            | 0.30                                 | 0.02         | 2.00                        | 353             | 2.33                                                   | 4.00          | 7.00                                    | 9.33                    |
| 4                           | R    | 3.33                                           | 2.00                | 1.33               | 0.00               | 1000                                      | 267            | 0.14                                 | 0.09         | 2.67                        | 393             | 1.00                                                   | 3.00          | 6.00                                    | 7.00                    |
| 5                           | R    | 4.00                                           | 2.67                | 1.33               | 0.00               | 933                                       | 400            | 0.23                                 | 0.00         | 3.00                        | 400             | 1.33                                                   | 3.00          | 7.00                                    | 8.33                    |
| 6                           | R    | 5.00                                           | 3.33                | 1.67               | 0.00               | 967                                       | 600            | 0.28                                 | 0.04         | 2.00                        | 313             | 1.33                                                   | 3.00          | 7.00                                    | 8.33                    |
| 7                           | R    | 3.00                                           | 2.00                | 1.00               | 0.00               | 833                                       | 167            | 0.24                                 | 0.00         | 2.00                        | 320             | 0.00                                                   | 2.00          | 5.00                                    | 5.00                    |
| 8                           | R    | 2.33                                           | 1.67                | 0.67               | 0.00               | 1000                                      | 100            | 0.15                                 | 0.00         | 2.00                        | 367             | 0.67                                                   | 2.00          | 4.33                                    | 5.00                    |
| <b>Mean</b>                 |      | <b>3.63</b>                                    | <b>2.42</b>         | <b>1.21</b>        | <b>0.00</b>        | <b>945.83</b>                             | <b>325.00</b>  | <b>0.22</b>                          | <b>0.02</b>  | <b>2.38</b>                 | <b>370.00</b>   | <b>0.96</b>                                            | <b>3.00</b>   | <b>6.00</b>                             | <b>6.96</b>             |
| <b>SE</b>                   |      | <b>0.38</b>                                    | <b>0.22</b>         | <b>0.18</b>        | <b>0.00</b>        | <b>26.68</b>                              | <b>70.08</b>   | <b>0.02</b>                          | <b>0.01</b>  | <b>0.16</b>                 | <b>16.81</b>    | <b>0.27</b>                                            | <b>0.27</b>   | <b>0.41</b>                             | <b>0.65</b>             |
| <b>ttest to G1</b>          |      | <b>0.000</b>                                   | <b>0.000</b>        | <b>0.001</b>       | <b>0.334</b>       | <b>0.000</b>                              | <b>0.000</b>   | <b>0.000</b>                         | <b>0.002</b> | <b>0.000</b>                | <b>0.000</b>    | <b>0.054</b>                                           | <b>0.438</b>  | <b>0.000</b>                            | <b>0.000</b>            |
| <b>%</b>                    |      | <b>45%</b>                                     | <b>44%</b>          | <b>45%</b>         | <b>100%</b>        | <b>28%</b>                                | <b>55%</b>     | <b>40%</b>                           | <b>87%</b>   | <b>39%</b>                  | <b>28%</b>      | <b>48%</b>                                             | <b>8%</b>     | <b>43%</b>                              | <b>43%</b>              |

\*Cartilage degeneration score=depth (0-5) for each 1/3 then summed (mean of 3 step section)  
 \*\*Width of any cartilage lesion (mean of 3 step section)  
 \*\*\*Width of cartilage degeneration extending >50% of total thickness (mean of 3 step section)  
 #Mean Lesion depth in µm vs depth to tidemark in center of zone in the Tibial plateau (mean of 3 step section)  
 ##Osteophyte scores 1=small up to 299 µm, 2=medium 300-399 µm, 3=large 400-499 µm, 4=very large 500-599 µm, 5=very large ≥600 µm

#### 5) Fluocinolone (5 µg/kg, i.p.)

Animals treated IP with 5 µg/kg daily of Fluocinolone had significantly reduced bone scores compared to the vehicle controls (27%). Other general pathology parameters were similar to the controls. Collagen degeneration widths were not significantly affected. The area of viable cartilage matrix was significantly increased by 17%. Growth plate thickness was significantly decreased compared to the vehicle controls.

**Table 40.** Histopathology of MMT/MCLT animals treated with fluocinolone (Group 5; Systemic low dose)

| Treatment Group<br>Animal # | Knee | Medial Tibial<br>Cartilage Degeneration Score* |                     |                    |                    | Tibial Cartilage<br>Degeneration<br>Width |                | Depth Ratio<br>Any Matrix<br>Change# |              | Medial Tibial<br>Osteophyte |                 | Medial<br>Femur<br>Cartilage<br>Degeneration<br>Score* | Bone<br>Score | Total<br>Joint<br>Score<br>w/o<br>Femur | Total<br>Joint<br>Score |
|-----------------------------|------|------------------------------------------------|---------------------|--------------------|--------------------|-------------------------------------------|----------------|--------------------------------------|--------------|-----------------------------|-----------------|--------------------------------------------------------|---------------|-----------------------------------------|-------------------------|
|                             |      | 3 Zone<br>total                                | Zone 1<br>(Outside) | Zone 2<br>(Middle) | Zone 3<br>(Inside) | Total<br>(µm)**                           | Sig<br>(µm)*** | Mean                                 | Zone<br>2    | Score<br>##                 | Measure<br>(µm) |                                                        |               |                                         |                         |
|                             |      |                                                |                     |                    |                    |                                           |                |                                      |              |                             |                 |                                                        |               |                                         |                         |
| <b>05</b><br>B1 5 µg/kg     |      |                                                |                     |                    |                    |                                           |                |                                      |              |                             |                 |                                                        |               |                                         |                         |
| 1                           | R    | 6.33                                           | 5.00                | 1.33               | 0.00               | 933                                       | 667            | 0.34                                 | 0.02         | 3.00                        | 400             | 1.00                                                   | 2.00          | 9.33                                    | 10.33                   |
| 2                           | R    | 6.33                                           | 4.33                | 2.00               | 0.00               | 1300                                      | 667            | 0.39                                 | 0.15         | 4.67                        | 567             | 1.67                                                   | 2.00          | 11.00                                   | 12.67                   |
| 3                           | R    | 6.67                                           | 4.67                | 2.00               | 0.00               | 1067                                      | 700            | 0.41                                 | 0.22         | 2.33                        | 387             | 0.67                                                   | 2.00          | 9.00                                    | 9.67                    |
| 4                           | R    | 5.67                                           | 4.00                | 1.67               | 0.00               | 1300                                      | 600            | 0.38                                 | 0.16         | 3.00                        | 400             | 1.67                                                   | 3.00          | 8.67                                    | 10.33                   |
| 5                           | R    | 5.67                                           | 4.00                | 1.33               | 0.33               | 1100                                      | 533            | 0.33                                 | 0.03         | 3.33                        | 467             | 1.67                                                   | 2.00          | 9.00                                    | 10.67                   |
| 6                           | R    | 3.33                                           | 2.33                | 1.00               | 0.00               | 1000                                      | 233            | 0.27                                 | 0.04         | 3.00                        | 433             | 1.33                                                   | 3.00          | 6.33                                    | 7.67                    |
| 7                           | R    | 7.67                                           | 4.67                | 3.00               | 0.00               | 1433                                      | 733            | 0.37                                 | 0.21         | 3.67                        | 493             | 1.67                                                   | 3.00          | 11.33                                   | 13.00                   |
| 8                           | R    | 7.00                                           | 4.33                | 2.67               | 0.00               | 1100                                      | 733            | 0.34                                 | 0.11         | 3.67                        | 493             | 1.00                                                   | 2.00          | 10.67                                   | 11.67                   |
| <b>Mean</b>                 |      | <b>6.08</b>                                    | <b>4.17</b>         | <b>1.88</b>        | <b>0.04</b>        | <b>1154.17</b>                            | <b>608.33</b>  | <b>0.35</b>                          | <b>0.12</b>  | <b>3.33</b>                 | <b>455.00</b>   | <b>1.33</b>                                            | <b>2.38</b>   | <b>9.42</b>                             | <b>10.75</b>            |
| <b>SE</b>                   |      | <b>0.46</b>                                    | <b>0.29</b>         | <b>0.24</b>        | <b>0.04</b>        | <b>60.73</b>                              | <b>58.67</b>   | <b>0.02</b>                          | <b>0.03</b>  | <b>0.24</b>                 | <b>21.85</b>    | <b>0.14</b>                                            | <b>0.18</b>   | <b>0.57</b>                             | <b>0.61</b>             |
| <b>ttest to G1</b>          |      | <b>0.432</b>                                   | <b>0.740</b>        | <b>0.277</b>       | <b>1.000</b>       | <b>0.065</b>                              | <b>0.102</b>   | <b>0.773</b>                         | <b>0.214</b> | <b>0.123</b>                | <b>0.110</b>    | <b>0.169</b>                                           | <b>0.003</b>  | <b>0.164</b>                            | <b>0.096</b>            |
| <b>%</b>                    |      | <b>7%</b>                                      | <b>3%</b>           | <b>15%</b>         | <b>0%</b>          | <b>12%</b>                                | <b>16%</b>     | <b>2%</b>                            | <b>35%</b>   | <b>15%</b>                  | <b>11%</b>      | <b>27%</b>                                             | <b>27%</b>    | <b>10%</b>                              | <b>13%</b>              |

Animals treated IP with 10 µg/kg of Fluocinolone had significantly reduced widths of significant cartilage degeneration (18%). Osteophyte scores (30%) and measurements (23%) were also significantly decreased, as was the total joint score without the femur (18%). Collagen degeneration widths were not significantly affected. The area of viable cartilage matrix was significantly increased by 20%. The mean growth plate thickness was significantly reduced.

## 6) Fluocinolone (10 µg/kg, i.p.)

**Table 41.** Histopathology of MMT/MCLT animals treated with fluocinolone (Group 6; Systemic high dose)

| Treatment Group<br>Animal #     | Knee | Medial Tibial<br>Cartilage Degeneration Score* |                     |                    |                    | Tibial Cartilage<br>Degeneration<br>Width |                | Depth Ratio<br>Any Matrix<br>Change# |              | Medial Tibial<br>Osteophyte |                 | Medial<br>Femur<br>Cartilage<br>Degeneration<br>Score* | Bone<br>Score | Total<br>Joint<br>Score<br>w/o<br>Femur | Total<br>Joint<br>Score |
|---------------------------------|------|------------------------------------------------|---------------------|--------------------|--------------------|-------------------------------------------|----------------|--------------------------------------|--------------|-----------------------------|-----------------|--------------------------------------------------------|---------------|-----------------------------------------|-------------------------|
|                                 |      | 3 Zone<br>total                                | Zone 1<br>(Outside) | Zone 2<br>(Middle) | Zone 3<br>(Inside) | Total<br>(µm)**                           | Sig<br>(µm)*** | Mean                                 | Zone<br>2    | Score<br>##                 | Measure<br>(µm) |                                                        |               |                                         |                         |
|                                 |      |                                                |                     |                    |                    |                                           |                |                                      |              |                             |                 |                                                        |               |                                         |                         |
| <b>06</b><br><b>B2 10 µg/kg</b> |      |                                                |                     |                    |                    |                                           |                |                                      |              |                             |                 |                                                        |               |                                         |                         |
| 1                               | R    | 6.33                                           | 4.33                | 2.00               | 0.00               | 1133                                      | 633            | 0.34                                 | 0.05         | 3.00                        | 413             | 2.00                                                   | 4.00          | 9.33                                    | 11.33                   |
| 2                               | R    | 4.67                                           | 3.33                | 1.33               | 0.00               | 1000                                      | 433            | 0.28                                 | 0.06         | 1.33                        | 280             | 3.00                                                   | 1.00          | 6.00                                    | 9.00                    |
| 3                               | R    | 7.00                                           | 4.67                | 2.33               | 0.00               | 1133                                      | 767            | 0.39                                 | 0.16         | 3.00                        | 427             | 2.33                                                   | 2.00          | 10.00                                   | 12.33                   |
| 4                               | R    | 7.67                                           | 4.67                | 2.67               | 0.33               | 1600                                      | 800            | 0.42                                 | 0.31         | 4.67                        | 587             | 3.00                                                   | 3.00          | 12.33                                   | 15.33                   |
| 5                               | R    | 5.33                                           | 4.00                | 1.33               | 0.00               | 1267                                      | 567            | 0.33                                 | 0.05         | 3.00                        | 400             | 1.33                                                   | 3.00          | 8.33                                    | 9.67                    |
| 6                               | R    | 6.00                                           | 4.00                | 2.00               | 0.00               | 1100                                      | 667            | 0.35                                 | 0.10         | 2.67                        | 380             | 2.00                                                   | 3.00          | 8.67                                    | 10.67                   |
| 7                               | R    | 4.67                                           | 3.00                | 1.67               | 0.00               | 1400                                      | 467            | 0.29                                 | 0.13         | 2.00                        | 333             | 1.00                                                   | 3.00          | 6.67                                    | 7.67                    |
| 8                               | R    | 5.00                                           | 3.00                | 2.00               | 0.00               | 1067                                      | 433            | 0.32                                 | 0.03         | 2.33                        | 333             | 1.00                                                   | 2.00          | 7.33                                    | 8.33                    |
| <b>Mean</b>                     |      | <b>5.83</b>                                    | <b>3.88</b>         | <b>1.92</b>        | <b>0.04</b>        | <b>1212.50</b>                            | <b>595.83</b>  | <b>0.34</b>                          | <b>0.11</b>  | <b>2.75</b>                 | <b>394.17</b>   | <b>1.96</b>                                            | <b>2.63</b>   | <b>8.58</b>                             | <b>10.54</b>            |
| <b>SE</b>                       |      | <b>0.39</b>                                    | <b>0.24</b>         | <b>0.16</b>        | <b>0.04</b>        | <b>70.69</b>                              | <b>51.35</b>   | <b>0.02</b>                          | <b>0.03</b>  | <b>0.34</b>                 | <b>32.50</b>    | <b>0.28</b>                                            | <b>0.32</b>   | <b>0.71</b>                             | <b>0.88</b>             |
| <b>ttest to G1</b>              |      | <b>0.191</b>                                   | <b>0.235</b>        | <b>0.231</b>       | <b>1.000</b>       | <b>0.270</b>                              | <b>0.052</b>   | <b>0.464</b>                         | <b>0.177</b> | <b>0.017</b>                | <b>0.013</b>    | <b>0.773</b>                                           | <b>0.107</b>  | <b>0.040</b>                            | <b>0.125</b>            |
| <b>%</b>                        |      | <b>11%</b>                                     | <b>10%</b>          | <b>13%</b>         | <b>0%</b>          | <b>8%</b>                                 | <b>18%</b>     | <b>6%</b>                            | <b>41%</b>   | <b>30%</b>                  | <b>23%</b>      | <b>-7%</b>                                             | <b>19%</b>    | <b>18%</b>                              | <b>14%</b>              |

\*Cartilage degeneration score=depth (0-5) for each 1/3 then summed (mean of 3 step section)  
\*\*Width of any cartilage lesion (mean of 3 step section)  
\*\*\*Width of cartilage degeneration extending >50% of total thickness (mean of 3 step section)  
#Mean Lesion depth in µm vs depth to tidemark in center of zone in theTibial plateau (mean of 3 step section)  
##Osteophyte scores 1=small up to 299 µm, 2=medium 300-399 µm, 3=large 400-499 µm, 4=very large 500-599 µm, 5=very large ≥600 µm

## 7) Clonidine (100 µg/kg, i.p.)

Animals treated IP with 100 ug/kg daily of Clonidine were similar to the controls for all general pathology parameters. Collagen degeneration widths, cartilage areas, and growth plate and MCL thickness were also not significantly affected.

**Table 42.** Histopathology of MMT/MCLT animals treated with clonidine (Group 7; Systemic delivery)

| Treatment Group<br>Animal #      | Knee | Medial Tibial<br>Cartilage Degeneration Score* |                     |                    |                    | Tibial Cartilage<br>Degeneration<br>Width |                | Depth Ratio<br>Any Matrix<br>Change# |              | Medial Tibial<br>Osteophyte |                 | Medial<br>Femur<br>Cartilage<br>Degeneration<br>Score* | Bone<br>Score | Total<br>Joint<br>Score<br>w/o<br>Femur | Total<br>Joint<br>Score |
|----------------------------------|------|------------------------------------------------|---------------------|--------------------|--------------------|-------------------------------------------|----------------|--------------------------------------|--------------|-----------------------------|-----------------|--------------------------------------------------------|---------------|-----------------------------------------|-------------------------|
|                                  |      | 3 Zone<br>total                                | Zone 1<br>(Outside) | Zone 2<br>(Middle) | Zone 3<br>(Inside) | Total<br>(µm)**                           | Sig<br>(µm)*** | Mean                                 | Zone<br>2    | Score<br>##                 | Measure<br>(µm) |                                                        |               |                                         |                         |
|                                  |      |                                                |                     |                    |                    |                                           |                |                                      |              |                             |                 |                                                        |               |                                         |                         |
| <b>07</b><br><b>C1 100 µg/kg</b> |      |                                                |                     |                    |                    |                                           |                |                                      |              |                             |                 |                                                        |               |                                         |                         |
| 1                                | R    | 5.67                                           | 4.00                | 1.67               | 0.00               | 1033                                      | 567            | 0.34                                 | 0.03         | 4.33                        | 580             | 1.00                                                   | 4.00          | 10.00                                   | 11.00                   |
| 2                                | R    | 7.67                                           | 5.00                | 2.67               | 0.00               | 1233                                      | 833            | 0.35                                 | 0.06         | 3.00                        | 447             | 2.67                                                   | 2.00          | 10.67                                   | 13.33                   |
| 3                                | R    | 5.33                                           | 3.67                | 1.67               | 0.00               | 1067                                      | 633            | 0.35                                 | 0.15         | 4.00                        | 580             | 1.00                                                   | 2.00          | 9.33                                    | 10.33                   |
| 4                                | R    | 5.00                                           | 4.00                | 1.00               | 0.00               | 1200                                      | 467            | 0.32                                 | 0.26         | 4.67                        | 587             | 1.33                                                   | 2.00          | 9.67                                    | 11.00                   |
| 5                                | R    | 7.00                                           | 4.00                | 3.00               | 0.00               | 1367                                      | 867            | 0.35                                 | 0.25         | 3.33                        | 473             | 1.00                                                   | 3.00          | 10.33                                   | 11.33                   |
| 6                                | R    | 6.00                                           | 4.00                | 2.00               | 0.00               | 1267                                      | 733            | 0.33                                 | 0.07         | 3.00                        | 433             | 1.00                                                   | 4.00          | 9.00                                    | 10.00                   |
| 7                                | R    | 7.67                                           | 4.67                | 3.00               | 0.00               | 1200                                      | 933            | 0.47                                 | 0.44         | 5.00                        | 700             | 1.33                                                   | 2.00          | 12.67                                   | 14.00                   |
| 8                                | R    | 4.67                                           | 3.67                | 1.00               | 0.00               | 1033                                      | 500            | 0.30                                 | 0.00         | 4.00                        | 520             | 1.00                                                   | 4.00          | 8.67                                    | 9.67                    |
| <b>Mean</b>                      |      | <b>6.13</b>                                    | <b>4.13</b>         | <b>2.00</b>        | <b>0.00</b>        | <b>1175.00</b>                            | <b>691.67</b>  | <b>0.35</b>                          | <b>0.16</b>  | <b>3.92</b>                 | <b>540.00</b>   | <b>1.29</b>                                            | <b>2.88</b>   | <b>10.04</b>                            | <b>11.33</b>            |
| <b>SE</b>                        |      | <b>0.42</b>                                    | <b>0.17</b>         | <b>0.29</b>        | <b>0.00</b>        | <b>42.61</b>                              | <b>62.28</b>   | <b>0.02</b>                          | <b>0.05</b>  | <b>0.27</b>                 | <b>31.60</b>    | <b>0.20</b>                                            | <b>0.35</b>   | <b>0.44</b>                             | <b>0.55</b>             |
| <b>ttest to G1</b>               |      | <b>0.448</b>                                   | <b>0.567</b>        | <b>0.542</b>       | <b>0.334</b>       | <b>0.057</b>                              | <b>0.626</b>   | <b>0.791</b>                         | <b>0.712</b> | <b>1.000</b>                | <b>0.519</b>    | <b>0.171</b>                                           | <b>0.349</b>  | <b>0.507</b>                            | <b>0.265</b>            |
| <b>%</b>                         |      | <b>6%</b>                                      | <b>4%</b>           | <b>9%</b>          | <b>100%</b>        | <b>10%</b>                                | <b>5%</b>      | <b>2%</b>                            | <b>14%</b>   | <b>0%</b>                   | <b>-5%</b>      | <b>30%</b>                                             | <b>12%</b>    | <b>4%</b>                               | <b>8%</b>               |

### 8) Alendronate (10 µg/kg, i.p.)

Animals treated IP with 10 ug/kg of Alendronate had significantly decreased widths of total cartilage degeneration (10%). Other general pathology parameters were similar to the controls for all general pathology parameters. Collagen degeneration widths, cartilage areas, and growth plate and MCL thickness were also not significantly affected. All animals had retained calcified cartilage at the physis/metaphysis.

**Table 43.** Histopathology of MMT/MCLT animals treated with Alendronate (Group 8; Systemic delivery)

| Treatment Group<br>Animal # | Knee | Medial Tibial<br>Cartilage Degeneration Score* |                     |                    |                    | Tibial Cartilage<br>Degeneration<br>Width |                | Depth Ratio<br>Any Matrix<br>Change# |              | Medial Tibial<br>Osteophyte |                 | Medial<br>Femur<br>Cartilage<br>Degeneration<br>Score* | Bone<br>Score | Total<br>Joint<br>Score<br>w/o<br>Femur | Total<br>Joint<br>Score |
|-----------------------------|------|------------------------------------------------|---------------------|--------------------|--------------------|-------------------------------------------|----------------|--------------------------------------|--------------|-----------------------------|-----------------|--------------------------------------------------------|---------------|-----------------------------------------|-------------------------|
|                             |      | 3 Zone<br>total                                | Zone 1<br>(Outside) | Zone 2<br>(Middle) | Zone 3<br>(Inside) | Total<br>(µm)**                           | Sig<br>(µm)*** | Mean                                 | Zone<br>2    | Score<br>##                 | Measure<br>(µm) |                                                        |               |                                         |                         |
| <b>08</b>                   |      |                                                |                     |                    |                    |                                           |                |                                      |              |                             |                 |                                                        |               |                                         |                         |
| <b>D1 10 µg/kg</b>          |      |                                                |                     |                    |                    |                                           |                |                                      |              |                             |                 |                                                        |               |                                         |                         |
| 1                           | R    | 5.33                                           | 3.33                | 2.00               | 0.00               | 1167                                      | 533            | 0.30                                 | 0.15         | 4.00                        | 500             | 1.33                                                   | 4.00          | 9.33                                    | 10.67                   |
| 2                           | R    | 6.33                                           | 4.00                | 2.33               | 0.00               | 1133                                      | 733            | 0.34                                 | 0.04         | 4.67                        | 567             | 0.67                                                   | 2.00          | 11.00                                   | 11.67                   |
| 3                           | R    | 6.33                                           | 4.00                | 2.33               | 0.00               | 1200                                      | 767            | 0.38                                 | 0.23         | 3.00                        | 413             | 2.00                                                   | 2.00          | 9.33                                    | 11.33                   |
| 4                           | R    | 7.67                                           | 5.00                | 2.67               | 0.00               | 1233                                      | 833            | 0.44                                 | 0.32         | 4.00                        | 540             | 2.33                                                   | 3.00          | 11.67                                   | 14.00                   |
| 5                           | R    | 5.33                                           | 3.67                | 1.67               | 0.00               | 1067                                      | 600            | 0.30                                 | 0.13         | 3.33                        | 433             | 1.00                                                   | 4.00          | 8.67                                    | 9.67                    |
| 6                           | R    | 5.00                                           | 3.33                | 1.67               | 0.00               | 1367                                      | 600            | 0.33                                 | 0.09         | 3.00                        | 440             | 1.00                                                   | 3.00          | 8.00                                    | 9.00                    |
| 7                           | R    | 5.00                                           | 3.33                | 1.67               | 0.00               | 1100                                      | 533            | 0.34                                 | 0.10         | 4.00                        | 540             | 0.33                                                   | 3.00          | 9.00                                    | 9.33                    |
| 8                           | R    | 5.67                                           | 3.67                | 2.00               | 0.00               | 1133                                      | 600            | 0.37                                 | 0.17         | 3.00                        | 400             | 5.67                                                   | 1.00          | 8.67                                    | 14.33                   |
| <b>Mean</b>                 |      | <b>5.83</b>                                    | <b>3.79</b>         | <b>2.04</b>        | <b>0.00</b>        | <b>1175.00</b>                            | <b>650.00</b>  | <b>0.35</b>                          | <b>0.15</b>  | <b>3.63</b>                 | <b>479.17</b>   | <b>1.79</b>                                            | <b>2.75</b>   | <b>9.46</b>                             | <b>11.25</b>            |
| <b>SE</b>                   |      | <b>0.32</b>                                    | <b>0.20</b>         | <b>0.13</b>        | <b>0.00</b>        | <b>33.18</b>                              | <b>39.84</b>   | <b>0.02</b>                          | <b>0.03</b>  | <b>0.22</b>                 | <b>23.04</b>    | <b>0.60</b>                                            | <b>0.37</b>   | <b>0.44</b>                             | <b>0.72</b>             |
| <b>ttest to G1</b>          |      | <b>0.148</b>                                   | <b>0.123</b>        | <b>0.446</b>       | <b>0.334</b>       | <b>0.040</b>                              | <b>0.164</b>   | <b>0.765</b>                         | <b>0.599</b> | <b>0.406</b>                | <b>0.348</b>    | <b>0.952</b>                                           | <b>0.233</b>  | <b>0.124</b>                            | <b>0.289</b>            |
| <b>%</b>                    |      | <b>11%</b>                                     | <b>12%</b>          | <b>8%</b>          | <b>100%</b>        | <b>10%</b>                                | <b>11%</b>     | <b>2%</b>                            | <b>15%</b>   | <b>7%</b>                   | <b>7%</b>       | <b>2%</b>                                              | <b>15%</b>    | <b>10%</b>                              | <b>8%</b>               |

\*Cartilage degeneration score=depth (0-5) for each 1/3 then summed (mean of 3 step section)  
 \*\*Width of any cartilage lesion (mean of 3 step section)  
 \*\*\*Width of cartilage degeneration extending >50% of total thickness (mean of 3 step section)  
 #Mean Lesion depth in µm vs depth to tidemark in center of zone in the Tibial plateau (mean of 3 step section)  
 ##Osteophyte scores 1=small up to 299 µm, 2=medium 300-399 µm, 3=large 400-499 µm, 4=very large 500-599 µm, 5=very large ≥600 µm

### 9) Curcumin (50 mg/kg, p.o.)

Animals treated PO with 50 mg/kg of Curcumin were similar to the controls for all general pathology parameters. Collagen degeneration widths, cartilage areas, and growth plate and MCL thickness were also not significantly affected.

**Table 44.** Histopathology of MMT/MCLT animals treated with Curcumin (Group 9; Oral delivery)

| Treatment Group<br>Animal # | Knee | Medial Tibial<br>Cartilage Degeneration Score* |                     |                    |                    | Tibial Cartilage<br>Degeneration<br>Width |                | Depth Ratio<br>Any Matrix<br>Change# |              | Medial Tibial<br>Osteophyte |                 | Medial<br>Femur<br>Cartilage<br>Degeneration<br>Score* | Bone<br>Score | Total<br>Joint<br>Score<br>w/o<br>Femur | Total<br>Joint<br>Score |
|-----------------------------|------|------------------------------------------------|---------------------|--------------------|--------------------|-------------------------------------------|----------------|--------------------------------------|--------------|-----------------------------|-----------------|--------------------------------------------------------|---------------|-----------------------------------------|-------------------------|
|                             |      | 3 Zone<br>total                                | Zone 1<br>(Outside) | Zone 2<br>(Middle) | Zone 3<br>(Inside) | Total<br>(µm)**                           | Sig<br>(µm)*** | Mean                                 | Zone<br>2    | Score<br>##                 | Measure<br>(µm) |                                                        |               |                                         |                         |
| <b>09</b>                   |      |                                                |                     |                    |                    |                                           |                |                                      |              |                             |                 |                                                        |               |                                         |                         |
| <b>E1 50 mg/kg</b>          |      |                                                |                     |                    |                    |                                           |                |                                      |              |                             |                 |                                                        |               |                                         |                         |
| 1                           | R    | 7.33                                           | 4.67                | 2.67               | 0.00               | 1400                                      | 767            | 0.42                                 | 0.30         | 5.00                        | 767             | 0.67                                                   | 4.00          | 12.33                                   | 13.00                   |
| 2                           | R    | 7.00                                           | 4.00                | 3.00               | 0.00               | 1333                                      | 833            | 0.51                                 | 0.54         | 5.00                        | 767             | 2.33                                                   | 3.00          | 12.00                                   | 14.33                   |
| 3                           | R    | 6.00                                           | 4.00                | 2.00               | 0.00               | 1433                                      | 667            | 0.32                                 | 0.03         | 5.00                        | 600             | 1.00                                                   | 4.00          | 11.00                                   | 12.00                   |
| 4                           | R    | 6.67                                           | 4.67                | 2.00               | 0.00               | 1100                                      | 700            | 0.45                                 | 0.38         | 4.33                        | 577             | 2.00                                                   | 3.00          | 11.00                                   | 13.00                   |
| 5                           | R    | 5.00                                           | 3.00                | 2.00               | 0.00               | 1167                                      | 767            | 0.26                                 | 0.05         | 3.00                        | 413             | 2.67                                                   | 4.00          | 8.00                                    | 10.67                   |
| 6                           | R    | 7.33                                           | 4.33                | 2.67               | 0.33               | 1333                                      | 767            | 0.40                                 | 0.54         | 3.00                        | 447             | 6.00                                                   | 2.00          | 10.33                                   | 16.33                   |
| 7                           | R    | 5.67                                           | 3.67                | 2.00               | 0.00               | 1233                                      | 600            | 0.32                                 | 0.10         | 4.00                        | 580             | 2.00                                                   | 2.00          | 9.67                                    | 11.67                   |
| 8                           | R    | 7.00                                           | 4.33                | 2.67               | 0.00               | 1500                                      | 833            | 0.42                                 | 0.26         | 4.67                        | 593             | 1.00                                                   | 3.00          | 11.67                                   | 12.67                   |
| <b>Mean</b>                 |      | <b>6.50</b>                                    | <b>4.08</b>         | <b>2.38</b>        | <b>0.04</b>        | <b>1312.50</b>                            | <b>741.67</b>  | <b>0.39</b>                          | <b>0.27</b>  | <b>4.25</b>                 | <b>592.92</b>   | <b>2.21</b>                                            | <b>3.13</b>   | <b>10.75</b>                            | <b>12.96</b>            |
| <b>SE</b>                   |      | <b>0.30</b>                                    | <b>0.20</b>         | <b>0.15</b>        | <b>0.04</b>        | <b>48.36</b>                              | <b>28.70</b>   | <b>0.03</b>                          | <b>0.07</b>  | <b>0.30</b>                 | <b>45.22</b>    | <b>0.60</b>                                            | <b>0.30</b>   | <b>0.50</b>                             | <b>0.62</b>             |
| <b>ttest to G1</b>          |      | <b>0.927</b>                                   | <b>0.503</b>        | <b>0.464</b>       | <b>1.000</b>       | <b>1.000</b>                              | <b>0.749</b>   | <b>0.452</b>                         | <b>0.288</b> | <b>0.414</b>                | <b>0.147</b>    | <b>0.587</b>                                           | <b>0.717</b>  | <b>0.662</b>                            | <b>0.456</b>            |
| <b>%</b>                    |      | <b>1%</b>                                      | <b>5%</b>           | <b>-8%</b>         | <b>0%</b>          | <b>0%</b>                                 | <b>-2%</b>     | <b>-8%</b>                           | <b>-50%</b>  | <b>-9%</b>                  | <b>-16%</b>     | <b>-20%</b>                                            | <b>4%</b>     | <b>-3%</b>                              | <b>-5%</b>              |

## 10) Withaferin (50 mg/kg, p.o.)

Animals treated PO with 50 mg/kg of Withaferin were similar to the controls for all general pathology parameters. Collagen degeneration widths, cartilage areas, and growth plate and MCL thickness were also not significantly affected.

**Table 45.** Histopathology of MMT/MCLT animals treated with Withaferin (Group 10; Oral delivery)

| Treatment Group<br>Animal # | Knee | Medial Tibial<br>Cartilage Degeneration Score* |                     |                    |                    | Tibial Cartilage<br>Degeneration<br>Width |                | Depth Ratio<br>Any Matrix<br>Change# |              | Medial Tibial<br>Osteophyte |                 | Medial<br>Femur<br>Cartilage<br>Degeneration<br>Score* | Bone<br>Score | Total<br>Joint<br>Score<br>w/o<br>Femur | Total<br>Joint<br>Score |
|-----------------------------|------|------------------------------------------------|---------------------|--------------------|--------------------|-------------------------------------------|----------------|--------------------------------------|--------------|-----------------------------|-----------------|--------------------------------------------------------|---------------|-----------------------------------------|-------------------------|
|                             |      | 3 Zone<br>total                                | Zone 1<br>(Outside) | Zone 2<br>(Middle) | Zone 3<br>(Inside) | Total<br>(µm)**                           | Sig<br>(µm)*** | Mean                                 | Zone<br>2    | Score<br>##                 | Measure<br>(µm) |                                                        |               |                                         |                         |
| <b>10</b>                   |      |                                                |                     |                    |                    |                                           |                |                                      |              |                             |                 |                                                        |               |                                         |                         |
| <b>F1 50 mg/kg</b>          |      |                                                |                     |                    |                    |                                           |                |                                      |              |                             |                 |                                                        |               |                                         |                         |
| 1                           | R    | 5.00                                           | 3.33                | 1.67               | 0.00               | 1567                                      | 533            | 0.37                                 | 0.15         | 4.00                        | 520             | 2.00                                                   | 3.00          | 9.00                                    | 11.00                   |
| 2                           | R    | 5.00                                           | 4.00                | 1.00               | 0.00               | 1000                                      | 533            | 0.33                                 | 0.00         | 3.33                        | 460             | 5.33                                                   | 4.00          | 8.33                                    | 13.67                   |
| 3                           | R    | 7.00                                           | 4.67                | 2.33               | 0.00               | 1200                                      | 667            | 0.36                                 | 0.16         | 4.67                        | 593             | 1.00                                                   | 3.00          | 11.67                                   | 12.67                   |
| 4                           | R    | 6.33                                           | 4.00                | 2.33               | 0.00               | 1367                                      | 600            | 0.44                                 | 0.35         | 4.67                        | 567             | 1.00                                                   | 3.00          | 11.00                                   | 12.00                   |
| 5                           | R    | 8.00                                           | 5.00                | 2.67               | 0.33               | 1600                                      | 833            | 0.49                                 | 0.49         | 4.00                        | 513             | 2.00                                                   | 2.00          | 12.00                                   | 14.00                   |
| 6                           | R    | 4.67                                           | 3.67                | 1.00               | 0.00               | 1000                                      | 567            | 0.29                                 | 0.02         | 4.00                        | 527             | 1.33                                                   | 3.00          | 8.67                                    | 10.00                   |
| 7                           | R    | 6.67                                           | 4.33                | 2.33               | 0.00               | 1233                                      | 767            | 0.42                                 | 0.28         | 4.67                        | 593             | 1.00                                                   | 2.00          | 11.33                                   | 12.33                   |
| 8                           | R    | 5.67                                           | 4.00                | 1.67               | 0.00               | 1133                                      | 600            | 0.32                                 | 0.01         | 2.33                        | 350             | 1.00                                                   | 3.00          | 8.00                                    | 9.00                    |
| <b>Mean</b>                 |      | <b>6.04</b>                                    | <b>4.13</b>         | <b>1.88</b>        | <b>0.04</b>        | <b>1262.50</b>                            | <b>637.50</b>  | <b>0.38</b>                          | <b>0.18</b>  | <b>3.96</b>                 | <b>515.42</b>   | <b>1.83</b>                                            | <b>2.88</b>   | <b>10.00</b>                            | <b>11.83</b>            |
| <b>SE</b>                   |      | <b>0.41</b>                                    | <b>0.19</b>         | <b>0.23</b>        | <b>0.04</b>        | <b>82.00</b>                              | <b>39.06</b>   | <b>0.02</b>                          | <b>0.06</b>  | <b>0.28</b>                 | <b>28.46</b>    | <b>0.52</b>                                            | <b>0.23</b>   | <b>0.58</b>                             | <b>0.61</b>             |
| <b>ttest to G1</b>          |      | <b>0.360</b>                                   | <b>0.585</b>        | <b>0.255</b>       | <b>1.000</b>       | <b>0.612</b>                              | <b>0.106</b>   | <b>0.590</b>                         | <b>0.997</b> | <b>0.915</b>                | <b>0.949</b>    | <b>1.000</b>                                           | <b>0.201</b>  | <b>0.535</b>                            | <b>0.606</b>            |
| <b>%</b>                    |      | <b>8%</b>                                      | <b>4%</b>           | <b>15%</b>         | <b>0%</b>          | <b>4%</b>                                 | <b>12%</b>     | <b>-5%</b>                           | <b>0%</b>    | <b>-1%</b>                  | <b>0%</b>       | <b>0%</b>                                              | <b>12%</b>    | <b>4%</b>                               | <b>4%</b>               |

\*Cartilage degeneration score=depth (0-5) for each 1/3 then summed (mean of 3 step section)  
 \*\*Width of any cartilage lesion (mean of 3 step section)  
 \*\*\*Width of cartilage degeneration extending >50% of total thickness (mean of 3 step section)  
 #Mean Lesion depth in µm vs depth to tidemark in center of zone in the Tibial plateau (mean of 3 step section)  
 ##Osteophyte scores 1=small up to 299 µm, 2=medium 300-399 µm, 3=large 400-499 µm, 4=very large 500-599 µm, 5=very large ≥600 µm

## Conclusions

Results of the histopathological analysis indicate that IP treatment with Tacrolimus (0.3 or 0.6 mg/kg) had significant beneficial effects on most parameters of medial meniscal tear induced osteoarthritis in rats, although these effects came in conjunction with decreased weight gain, occasional blood in the stool, and decreased metaphyseal/diaphyseal new bone, as well as decreased growth plate thickness. These effects on growth plate and bone formation are likely a result of decreased growth associated with decreased food consumption. Since these animals had blood in the stool it is likely that they may have been lethargic, which could have contributed to the observed beneficial effects on cartilage pathology. Treatment with 5 or 10 µg of Fluocinolone had more sporadic significant benefit on cartilage parameters without the effect on new bone, although growth plate thickness was decreased, as were subchondral bone scores. Decreased general activity likely contributed to the sporadic efficacy on cartilage parameters. Treatment with Alendronate caused retention of calcified cartilage in the physis/metaphysis, but in general did not beneficially affect cartilage parameters, as was the case with compounds Clonidine, Curcumin, and Withaferin.

Evaluation of weight bearing (incapacitance meter) did not reveal a consistent pattern of effect for any treatment except Morphine. Morphine treatment was effective on day 7 (1 hour), day 14 (1, 3, and 5 hours), and day 21 (1, 3, and 5 hours) based on the absence of a significant difference between load bearing of right and left legs. Comparisons made to baseline (left-right differential) indicated decreased discomfort at these same time points, but changes were not significant. Evaluation of the data as a percentage of the force on the right leg showed the same pattern. Larger group sizes could have potentially revealed significant differences.

Evaluation of the weight bearing data for Tacrolimus and Fluocinolone was complicated by toxicity, as indicated by decreased weight gain and clinical signs such as blood in the stool with Tacrolimus. If malaise and decreased activity were associated with dosing, this could have influenced weight bearing at all time points. These agents need to be tested at doses that don't induce clinical signs of toxicity in order to evaluate their true effect on cartilage degeneration and pain.

## MMT/MCLT Trial 2: Representative Images

Representative images from MCLT/MMT animal joints of the different treatments in Trial 2 are shown below in **Figures 58 and 59**. Group 1 was treated with intra-articular (IA) saline weekly. Group 2 was treated with subcutaneous clonidine weekly (100 ug/kg). Group 3 was treated with IA clonidine weekly (4.5 ug). Group 4 was treated with IA triamcinolone hexacetonide weekly (150 ug). Group 5 was treated with IA low dose tacrolimus weekly (15 ng). Group 6 was treated with IA high dose tacrolimus weekly (30 ng). Group 7 was treated with IA fluocinolone weekly (15 ng). Group 8 was treated with intra-articular curcumin weekly (30 ug).

**Figure 58.** Representative cross-sectional images from vehicle-treated MCLT/MMT animals (Trial 2).

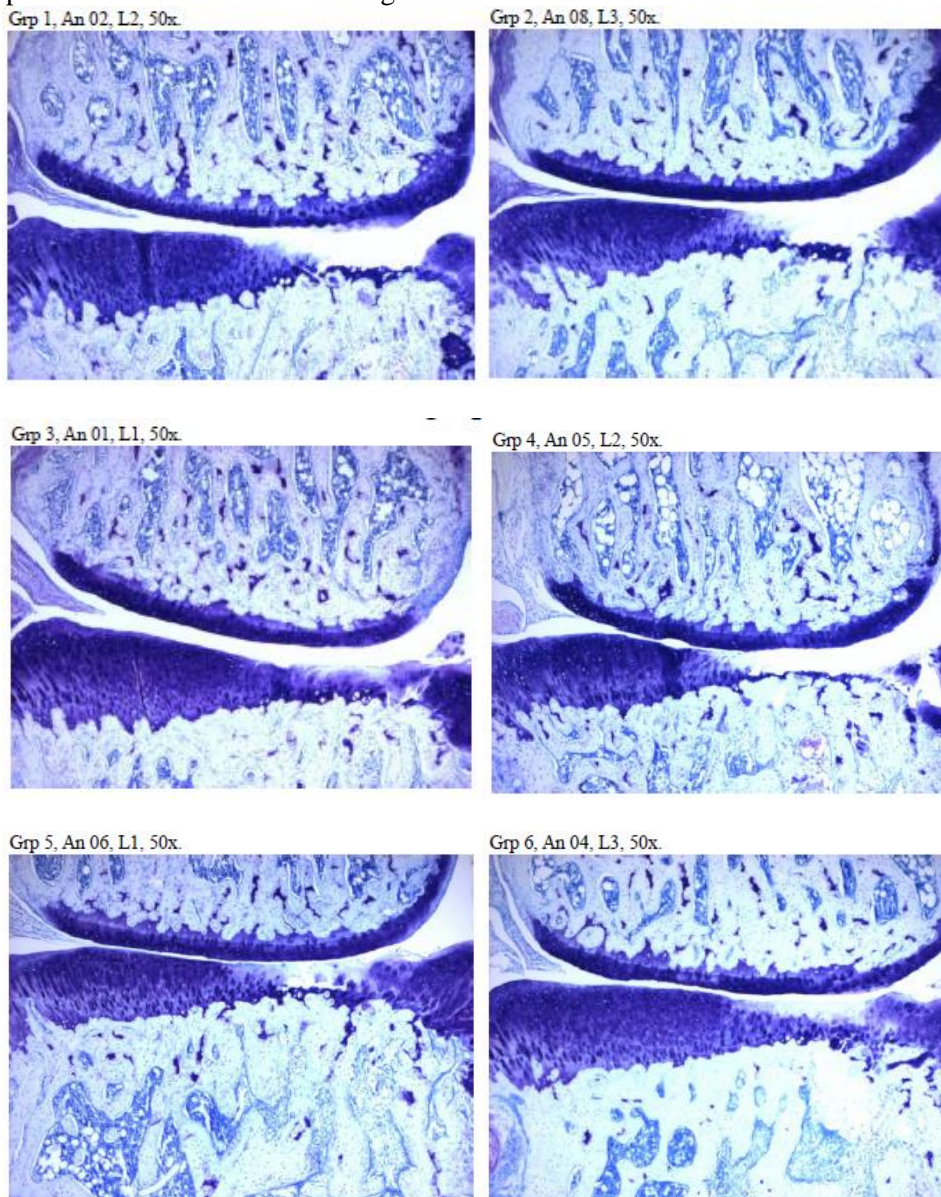

Grp 7, An 09, L3, 50x.

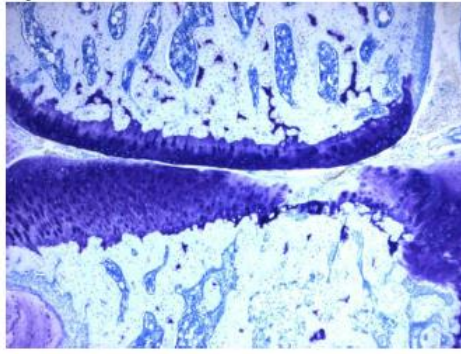

Grp 8, An 09, L3, 50x.

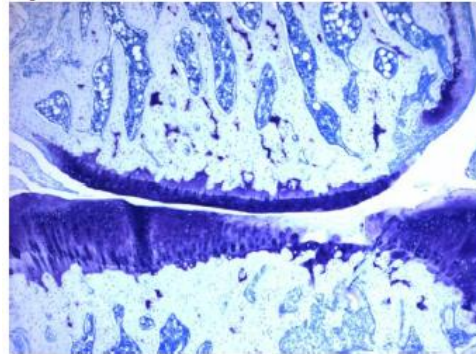

Shown below is a representative photomicrograph of a large osteophyte and synoviocytis seen in the synovial space in animal 2 of group 4 in Trial 2 (Triamcinolone hexacetonide treated animals). Analysis of the joint space was completed for each animal (discussed below but data not shown).

**Figure 59** – Cross section of the joint space for Triamcinolone Hexacetonide treated rats (Trial 2) depicting a cartilage lesion (large arrow), an Osteophyte (small arrow), and a close up of the synovial membrane.

Large arrow= Cartilage lesion  
Small arrow=Osteophyte  
M=Bone marrow

S=Synovium  
E=Exudate

Grp 4, An 2, L3, 25x.

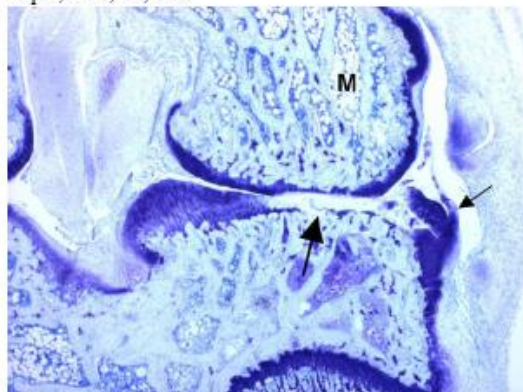

Grp 4, An 2, L3, 400x.

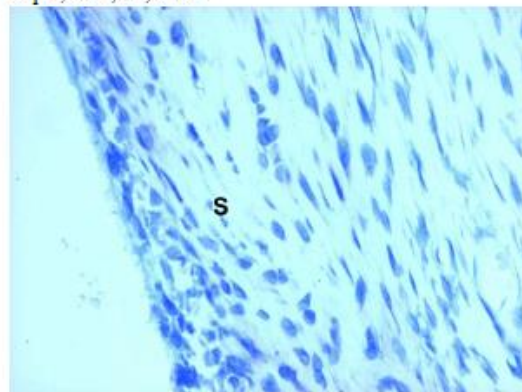

## MMT/MCLT Trial 2: Semi-quantitative Analysis of Histological Sections

### 1) Saline (Vehicle)

Animals treated with IA saline alone had tibial cartilage degeneration that was most severe in the outer 2/3 of the tibial plateau and less severe in the inner 1/3 (see Figure 51 above). Osteophytes were present in all animals and ranged from medium to very large, with a mean measurement of 471 um. Femoral cartilage degeneration was seen in nine of ten animals and ranged from minimal to mild when present. The mean total joint score for this group was 10.23. Eight of ten animals had minimal to mild synovitis (e.g., Figure 69 above).



**Table 46. Histopathology of MMT/MCLT animals treated with saline (Group 1; IA delivery)**

| Treatment Group<br>Animal # | Knee | Medial Tibial<br>Cartilage Degeneration Score* |                     |                    |                    | Tibial Cartilage<br>Degeneration<br>Width |                | Depth Ratio<br>Any Matrix<br>Change# |             | Medial Tibial<br>Osteophyte |                 | Medial<br>Femur<br>Cartilage<br>Degeneration<br>Score* | Bone<br>Score | Total<br>Joint<br>Score<br>w/ o<br>Femur | Total<br>Joint<br>Score |
|-----------------------------|------|------------------------------------------------|---------------------|--------------------|--------------------|-------------------------------------------|----------------|--------------------------------------|-------------|-----------------------------|-----------------|--------------------------------------------------------|---------------|------------------------------------------|-------------------------|
|                             |      | 3 Zone<br>total                                | Zone 1<br>(Outside) | Zone 2<br>(Middle) | Zone 3<br>(Inside) | Total<br>(µm)**                           | Sub<br>(µm)*** | Mean                                 | Zone<br>2   | Score<br>##                 | Measure<br>(µm) |                                                        |               |                                          |                         |
|                             |      |                                                |                     |                    |                    |                                           |                |                                      |             |                             |                 |                                                        |               |                                          |                         |
| <b>01<br/>Vehicle</b>       |      |                                                |                     |                    |                    |                                           |                |                                      |             |                             |                 |                                                        |               |                                          |                         |
| 1                           | R    | 4.00                                           | 3.00                | 1.00               | 0.00               | 1000                                      | 400            | 0.27                                 | 0.00        | 2.00                        | 327             | 0.67                                                   | 4.00          | 6.00                                     | 6.67                    |
| 2                           | R    | 8.00                                           | 5.00                | 3.00               | 0.00               | 1333                                      | 900            | 0.41                                 | 0.23        | 3.00                        | 417             | 2.00                                                   | 4.00          | 11.00                                    | 13.00                   |
| 3                           | R    | 8.00                                           | 4.67                | 3.33               | 0.00               | 1500                                      | 900            | 0.43                                 | 0.29        | 4.67                        | 567             | 0.67                                                   | 3.00          | 12.67                                    | 13.33                   |
| 4                           | R    | 4.33                                           | 3.33                | 1.00               | 0.00               | 967                                       | 533            | 0.26                                 | 0.03        | 2.33                        | 333             | 1.00                                                   | 3.00          | 6.67                                     | 7.67                    |
| 5                           | R    | 5.33                                           | 3.67                | 1.67               | 0.00               | 1367                                      | 667            | 0.35                                 | 0.09        | 3.33                        | 467             | 1.00                                                   | 4.00          | 8.67                                     | 9.67                    |
| 6                           | R    | 7.67                                           | 5.00                | 2.33               | 0.33               | 1400                                      | 833            | 0.39                                 | 0.20        | 4.33                        | 567             | 2.00                                                   | 3.00          | 12.00                                    | 14.00                   |
| 7                           | R    | 5.67                                           | 4.33                | 1.33               | 0.00               | 967                                       | 733            | 0.37                                 | 0.10        | 3.67                        | 467             | 0.00                                                   | 4.00          | 9.33                                     | 9.33                    |
| 8                           | R    | 6.33                                           | 4.00                | 2.33               | 0.00               | 1267                                      | 867            | 0.43                                 | 0.32        | 4.33                        | 567             | 1.67                                                   | 3.00          | 10.67                                    | 12.33                   |
| 9                           | R    | 3.00                                           | 2.00                | 1.00               | 0.00               | 1267                                      | 333            | 0.17                                 | 0.01        | 4.00                        | 500             | 1.67                                                   | 2.00          | 7.00                                     | 8.67                    |
| 10                          | R    | 3.67                                           | 2.33                | 1.33               | 0.00               | 1033                                      | 333            | 0.20                                 | 0.24        | 4.00                        | 500             | 0.00                                                   | 2.00          | 7.67                                     | 7.67                    |
| <b>Mean</b>                 |      | <b>5.60</b>                                    | <b>3.73</b>         | <b>1.83</b>        | <b>0.03</b>        | <b>1210.00</b>                            | <b>650.00</b>  | <b>0.33</b>                          | <b>0.15</b> | <b>3.57</b>                 | <b>471.00</b>   | <b>1.07</b>                                            | <b>3.20</b>   | <b>9.17</b>                              | <b>10.23</b>            |
| <b>SE</b>                   |      | <b>0.59</b>                                    | <b>0.34</b>         | <b>0.27</b>        | <b>0.03</b>        | <b>63.26</b>                              | <b>73.74</b>   | <b>0.03</b>                          | <b>0.04</b> | <b>0.28</b>                 | <b>28.27</b>    | <b>0.24</b>                                            | <b>0.25</b>   | <b>0.74</b>                              | <b>0.85</b>             |
| <b>%</b>                    |      | <b>0%</b>                                      | <b>0%</b>           | <b>0%</b>          | <b>0%</b>          | <b>0%</b>                                 | <b>0%</b>      | <b>0%</b>                            | <b>0%</b>   | <b>0%</b>                   | <b>0%</b>       | <b>0%</b>                                              | <b>0%</b>     | <b>0%</b>                                | <b>0%</b>               |

\*Cartilage degeneration score=depth (0-5) for each 1/3 then summed (mean of 3 step section)  
\*\*Width of any cartilage lesion (mean of 3 step section)  
\*\*\*Width of cartilage degeneration extending >50% of total thickness (mean of 3 step section)  
#Mean Lesion depth in µm vs depth to tidemark in center of zone in theTibial plateau (mean of 3 step section)  
##Osteophyte scores 1=small up to 299 µm, 2=medium 300-399 µm, 3=large 400-499 µm, 4=very large 500-599 µm, 5=very large ≥600 µm

## 2) Clonidine (100 µg/kg, s.c. 1x/wk)

Animals treated with subcutaneously delivered Clonidine (100 ug/kg) once a week had slightly elevated scores and measurements compared to the saline controls for all general pathology parameters. Osteophyte scores and measurements were significantly increased by 26 and 25%, respectively. The percent area of cartilage matrix was significantly decreased by 77%. Collagen degeneration and growth plate and MCL thicknesses were not significantly affected, although severe and marked collagen loss scores were slightly elevated. Three animals had minimal subacute synovitis.

**Table 47. Histopathology of MMT/MCLT animals treated with clonidine (Group 2; SC delivery)**

| Treatment Group<br>Animal # | Knee | Medial Tibial<br>Cartilage Degeneration Score* |                     |                    |                    | Tibial Cartilage<br>Degeneration<br>Width |                | Depth Ratio<br>Any Matrix<br>Change# |              | Medial Tibial<br>Osteophyte |                 | Medial<br>Femur<br>Cartilage<br>Degeneration<br>Score* | Bone<br>Score | Total<br>Joint<br>Score<br>w/ o<br>Femur | Total<br>Joint<br>Score |
|-----------------------------|------|------------------------------------------------|---------------------|--------------------|--------------------|-------------------------------------------|----------------|--------------------------------------|--------------|-----------------------------|-----------------|--------------------------------------------------------|---------------|------------------------------------------|-------------------------|
|                             |      | 3 Zone<br>total                                | Zone 1<br>(Outside) | Zone 2<br>(Middle) | Zone 3<br>(Inside) | Total<br>(µm)**                           | Sub<br>(µm)*** | Mean                                 | Zone<br>2    | Score<br>##                 | Measure<br>(µm) |                                                        |               |                                          |                         |
|                             |      |                                                |                     |                    |                    |                                           |                |                                      |              |                             |                 |                                                        |               |                                          |                         |
| <b>02<br/>Clonidine</b>     |      |                                                |                     |                    |                    |                                           |                |                                      |              |                             |                 |                                                        |               |                                          |                         |
| 1                           | R    | 6.67                                           | 5.00                | 1.67               | 0.00               | 1133                                      | 800            | 0.37                                 | 0.14         | 5.00                        | 600             | 0.67                                                   | 4.00          | 11.67                                    | 12.33                   |
| 2                           | R    | 6.33                                           | 4.33                | 2.00               | 0.00               | 1133                                      | 800            | 0.45                                 | 0.44         | 4.00                        | 550             | 0.00                                                   | 3.00          | 10.33                                    | 10.33                   |
| 3                           | R    | 5.33                                           | 4.33                | 1.00               | 0.00               | 933                                       | 667            | 0.34                                 | 0.05         | 4.33                        | 563             | 0.00                                                   | 3.00          | 9.67                                     | 9.67                    |
| 4                           | R    | 5.00                                           | 4.00                | 1.00               | 0.00               | 1000                                      | 667            | 0.34                                 | 0.05         | 4.00                        | 517             | 0.33                                                   | 4.00          | 9.00                                     | 9.33                    |
| 5                           | R    | 5.67                                           | 4.67                | 1.00               | 0.00               | 1033                                      | 683            | 0.34                                 | 0.03         | 4.67                        | 600             | 0.00                                                   | 3.00          | 10.33                                    | 10.33                   |
| 6                           | R    | 6.00                                           | 4.00                | 2.00               | 0.00               | 1167                                      | 800            | 0.46                                 | 0.36         | 5.00                        | 600             | 1.00                                                   | 3.00          | 11.00                                    | 12.00                   |
| 7                           | R    | 4.67                                           | 3.67                | 1.00               | 0.00               | 1033                                      | 567            | 0.30                                 | 0.04         | 4.67                        | 600             | 2.33                                                   | 2.00          | 9.33                                     | 11.67                   |
| 8                           | R    | 7.33                                           | 5.00                | 2.33               | 0.00               | 1133                                      | 833            | 0.42                                 | 0.27         | 5.00                        | 783             | 2.00                                                   | 3.00          | 12.33                                    | 14.33                   |
| 9                           | R    | 4.00                                           | 3.00                | 1.00               | 0.00               | 1067                                      | 400            | 0.27                                 | 0.06         | 3.67                        | 480             | 0.00                                                   | 3.00          | 7.67                                     | 7.67                    |
| 10                          | R    | 6.67                                           | 4.67                | 2.00               | 0.00               | 1100                                      | 767            | 0.38                                 | 0.17         | 4.67                        | 583             | 1.33                                                   | 3.00          | 11.33                                    | 12.67                   |
| <b>Mean</b>                 |      | <b>5.77</b>                                    | <b>4.27</b>         | <b>1.50</b>        | <b>0.00</b>        | <b>1073.33</b>                            | <b>698.33</b>  | <b>0.37</b>                          | <b>0.16</b>  | <b>4.50</b>                 | <b>587.67</b>   | <b>0.77</b>                                            | <b>3.10</b>   | <b>10.27</b>                             | <b>11.03</b>            |
| <b>SE</b>                   |      | <b>0.33</b>                                    | <b>0.20</b>         | <b>0.17</b>        | <b>0.00</b>        | <b>23.20</b>                              | <b>42.49</b>   | <b>0.02</b>                          | <b>0.05</b>  | <b>0.15</b>                 | <b>25.29</b>    | <b>0.28</b>                                            | <b>0.18</b>   | <b>0.44</b>                              | <b>0.61</b>             |
| <b>ttest to G1</b>          |      | <b>0.807</b>                                   | <b>0.188</b>        | <b>0.317</b>       | <b>0.331</b>       | <b>0.058</b>                              | <b>0.577</b>   | <b>0.286</b>                         | <b>0.865</b> | <b>0.009</b>                | <b>0.007</b>    | <b>0.421</b>                                           | <b>0.749</b>  | <b>0.218</b>                             | <b>0.455</b>            |
| <b>%</b>                    |      | <b>-3%</b>                                     | <b>-14%</b>         | <b>18%</b>         | <b>100%</b>        | <b>11%</b>                                | <b>-7%</b>     | <b>-12%</b>                          | <b>-7%</b>   | <b>-26%</b>                 | <b>-25%</b>     | <b>28%</b>                                             | <b>3%</b>     | <b>-12%</b>                              | <b>-8%</b>              |

\*Cartilage degeneration score=depth (0-5) for each 1/3 then summed (mean of 3 step section)  
\*\*Width of any cartilage lesion (mean of 3 step section)  
\*\*\*Width of cartilage degeneration extending >50% of total thickness (mean of 3 step section)  
#Mean Lesion depth in µm vs depth to tidemark in center of zone in theTibial plateau (mean of 3 step section)  
##Osteophyte scores 1=small up to 299 µm, 2=medium 300-399 µm, 3=large 400-499 µm, 4=very large 500-599 µm, 5=very large ≥600 µm

## 3) IA Clonidine (4.5 µg)

Animals treated with IA clonidine (4.5 ug/weekly injection) had significantly decreased depth ratios of any matrix change in zone 2 (72%). Other general pathology parameters were not significantly affected. However, the total joint score was non-significantly decreased by 11% and bone scores were nonsignificantly decreased by 9%. Collagen degeneration, cartilage areas, and growth plate and MCL thicknesses were not significantly affected. All animals had mild subacute synovitis.

**Table 48.** Histopathology of MMT/MCLT animals treated with clonidine (Group 3; IA delivery)

| Treatment Group<br>Animal # | Knee | Medial Tibial<br>Cartilage Degeneration Score* |                     |                    |                    | Tibial Cartilage<br>Degeneration<br>Width |                | Depth Ratio<br>Any Matrix<br>Change# |              | Medial Tibial<br>Osteophyte |                 | Medial<br>Femur<br>Cartilage<br>Degeneration<br>Score* | Bone<br>Score | Total<br>Joint<br>Score<br>w/ o<br>Femur | Total<br>Joint<br>Score |
|-----------------------------|------|------------------------------------------------|---------------------|--------------------|--------------------|-------------------------------------------|----------------|--------------------------------------|--------------|-----------------------------|-----------------|--------------------------------------------------------|---------------|------------------------------------------|-------------------------|
|                             |      | 3 Zone<br>total                                | Zone 1<br>(Outside) | Zone 2<br>(Middle) | Zone 3<br>(Inside) | Total<br>(µm)**                           | Sub<br>(µm)*** | Mean                                 | Zone<br>2    | Score<br>##                 | Measure<br>(µm) |                                                        |               |                                          |                         |
|                             |      |                                                |                     |                    |                    |                                           |                |                                      |              |                             |                 |                                                        |               |                                          |                         |
| <b>03<br/>A1</b>            |      |                                                |                     |                    |                    |                                           |                |                                      |              |                             |                 |                                                        |               |                                          |                         |
| 1                           | R    | 4.33                                           | 3.33                | 1.00               | 0.00               | 1033                                      | 567            | 0.31                                 | 0.10         | 3.00                        | 400             | 2.33                                                   | 2.00          | 7.33                                     | 9.67                    |
| 2                           | R    | 5.00                                           | 3.33                | 1.67               | 0.00               | 1333                                      | 667            | 0.24                                 | 0.01         | 4.00                        | 530             | 1.00                                                   | 3.00          | 9.00                                     | 10.00                   |
| 3                           | R    | 4.33                                           | 3.33                | 1.00               | 0.00               | 1233                                      | 533            | 0.28                                 | 0.03         | 3.67                        | 483             | 0.33                                                   | 4.00          | 8.00                                     | 8.33                    |
| 4                           | R    | 3.33                                           | 2.33                | 1.00               | 0.00               | 1000                                      | 400            | 0.18                                 | 0.00         | 3.33                        | 463             | 0.00                                                   | 2.00          | 6.67                                     | 6.67                    |
| 5                           | R    | 5.67                                           | 4.00                | 1.67               | 0.00               | 1267                                      | 733            | 0.38                                 | 0.20         | 5.00                        | 700             | 0.67                                                   | 3.00          | 10.67                                    | 11.33                   |
| 6                           | R    | 5.00                                           | 4.67                | 0.33               | 0.00               | 900                                       | 600            | 0.32                                 | 0.02         | 4.00                        | 517             | 0.00                                                   | 3.00          | 9.00                                     | 9.00                    |
| 7                           | R    | 4.00                                           | 3.33                | 0.67               | 0.00               | 967                                       | 500            | 0.29                                 | 0.03         | 2.67                        | 397             | 0.00                                                   | 4.00          | 6.67                                     | 6.67                    |
| 8                           | R    | 4.33                                           | 3.67                | 0.67               | 0.00               | 1100                                      | 500            | 0.30                                 | 0.00         | 3.00                        | 413             | 1.00                                                   | 2.00          | 7.33                                     | 8.33                    |
| 9                           | R    | 6.33                                           | 4.67                | 1.67               | 0.00               | 967                                       | 767            | 0.34                                 | 0.00         | 3.00                        | 447             | 0.33                                                   | 3.00          | 9.33                                     | 9.67                    |
| 10                          | R    | 6.00                                           | 4.00                | 2.00               | 0.00               | 1467                                      | 800            | 0.31                                 | 0.04         | 4.67                        | 583             | 1.00                                                   | 3.00          | 10.67                                    | 11.67                   |
| <b>Mean</b>                 |      | <b>4.83</b>                                    | <b>3.67</b>         | <b>1.17</b>        | <b>0.00</b>        | <b>1126.67</b>                            | <b>606.67</b>  | <b>0.30</b>                          | <b>0.04</b>  | <b>3.63</b>                 | <b>493.33</b>   | <b>0.67</b>                                            | <b>2.90</b>   | <b>8.47</b>                              | <b>9.13</b>             |
| <b>SE</b>                   |      | <b>0.30</b>                                    | <b>0.22</b>         | <b>0.17</b>        | <b>0.00</b>        | <b>59.38</b>                              | <b>41.51</b>   | <b>0.02</b>                          | <b>0.02</b>  | <b>0.25</b>                 | <b>29.88</b>    | <b>0.23</b>                                            | <b>0.23</b>   | <b>0.47</b>                              | <b>0.54</b>             |
| <b>ttest to G1</b>          |      | <b>0.260</b>                                   | <b>0.870</b>        | <b>0.054</b>       | <b>0.331</b>       | <b>0.350</b>                              | <b>0.615</b>   | <b>0.366</b>                         | <b>0.019</b> | <b>0.860</b>                | <b>0.594</b>    | <b>0.240</b>                                           | <b>0.391</b>  | <b>0.437</b>                             | <b>0.289</b>            |
| <b>%</b>                    |      | <b>14%</b>                                     | <b>2%</b>           | <b>36%</b>         | <b>100%</b>        | <b>7%</b>                                 | <b>7%</b>      | <b>10%</b>                           | <b>72%</b>   | <b>-2%</b>                  | <b>-5%</b>      | <b>38%</b>                                             | <b>9%</b>     | <b>8%</b>                                | <b>11%</b>              |

\*Cartilage degeneration score=depth (0-5) for each 1/3 then summed (mean of 3 step section)  
\*\*Width of any cartilage lesion (mean of 3 step section)  
\*\*\*Width of cartilage degeneration extending >50% of total thickness (mean of 3 step section)  
#Mean Lesion depth in µm vs depth to tidemark in center of zone in theTibial plateau (mean of 3 step section)  
##Osteophyte scores 1=small up to 299 µm, 2=medium 300-399 µm, 3=large 400-499 µm, 4=very large 500-599 µm, 5=very large ≥600 µm

**4) IA Triamcinolone Hexacetonide (TH; 0.15 mg)**

Animals treated with 0.15 mg/week IA TH had significantly increased cartilage degeneration in zone 1 (28%), which contributed to a significant 35% increase in the 3-zone total. The widths of total (23%) and substantial (33%) cartilage degeneration were also significantly increased, as were the depth ratio of any matrix change, both the mean (38%) and in zone 2 (137%). Osteophyte scores (51%) and measurements (42%) were significantly decreased. The total joint score was non-significantly increased by 10%. The width of severe collagen degeneration was significantly increased by 176% and the widths of mild (44%) and minimal (53%) degeneration were significantly decreased. Corresponding significant increases were seen in the combined widths of severe+marked+moderate+mild (60%), severe+marked+moderate (114%), and severe+marked (153%) degeneration. Combined widths of mild+minimal (50%) and moderate+mild+minimal (46%) degeneration were significantly decreased. The percent area of viable cartilage matrix and the percent area of any matrix were significantly decreased by 37 and 199%, respectively. Growth plate and MCL thickness were both significantly decreased. All animals had hypocellular fibrous repair and marked bone marrow hypocellularity.

**Table 49.** Histopathology of MMT/MCLT animals treated with Triamcinolone Hexacetonide (Group 4; IA delivery)

| Treatment Group<br>Animal # | Knee | Medial Tibial<br>Cartilage Degeneration Score* |                     |                    |                    | Tibial Cartilage<br>Degeneration<br>Width |                | Depth Ratio<br>Any Matrix<br>Change# |              | Medial Tibial<br>Osteophyte |                 | Medial<br>Femur<br>Cartilage<br>Degeneration<br>Score* | Bone<br>Score | Total<br>Joint<br>Score<br>w/ o<br>Femur | Total<br>Joint<br>Score |
|-----------------------------|------|------------------------------------------------|---------------------|--------------------|--------------------|-------------------------------------------|----------------|--------------------------------------|--------------|-----------------------------|-----------------|--------------------------------------------------------|---------------|------------------------------------------|-------------------------|
|                             |      | 3 Zone<br>total                                | Zone 1<br>(Outside) | Zone 2<br>(Middle) | Zone 3<br>(Inside) | Total<br>(µm)**                           | Sub<br>(µm)*** | Mean                                 | Zone<br>2    | Score<br>##                 | Measure<br>(µm) |                                                        |               |                                          |                         |
|                             |      |                                                |                     |                    |                    |                                           |                |                                      |              |                             |                 |                                                        |               |                                          |                         |
| <b>04<br/>B</b>             |      |                                                |                     |                    |                    |                                           |                |                                      |              |                             |                 |                                                        |               |                                          |                         |
| 1                           | R    | 7.67                                           | 5.00                | 2.67               | 0.00               | 1933                                      | 933            | 0.48                                 | 0.45         | 2.00                        | 333             | 1.33                                                   | 4.00          | 9.67                                     | 11.00                   |
| 2                           | R    | 10.00                                          | 5.00                | 4.00               | 1.00               | 2000                                      | 1100           | 0.71                                 | 1.00         | 2.67                        | 383             | 5.67                                                   | 4.00          | 12.67                                    | 18.33                   |
| 3                           | R    | 7.00                                           | 4.67                | 2.00               | 0.33               | 1633                                      | 800            | 0.45                                 | 0.30         | 1.33                        | 267             | 1.33                                                   | 4.00          | 8.33                                     | 9.67                    |
| 4                           | R    | 7.67                                           | 5.00                | 2.67               | 0.00               | 1367                                      | 867            | 0.38                                 | 0.14         | 2.00                        | 313             | 1.67                                                   | 3.00          | 9.67                                     | 11.33                   |
| 5                           | R    | 7.67                                           | 5.00                | 2.67               | 0.00               | 1400                                      | 900            | 0.39                                 | 0.15         | 3.00                        | 400             | 0.67                                                   | 4.00          | 10.67                                    | 11.33                   |
| 6                           | R    | 6.00                                           | 4.67                | 1.33               | 0.00               | 1333                                      | 700            | 0.34                                 | 0.02         | 0.00                        | 0               | 1.00                                                   | 3.00          | 6.00                                     | 7.00                    |
| 7                           | R    | 8.00                                           | 5.00                | 3.00               | 0.00               | 1367                                      | 967            | 0.51                                 | 0.53         | 2.33                        | 350             | 3.00                                                   | 4.00          | 10.33                                    | 13.33                   |
| 8                           | R    | 9.00                                           | 5.00                | 3.33               | 0.67               | 1600                                      | 933            | 0.52                                 | 0.54         | 2.33                        | 343             | 2.33                                                   | 4.00          | 11.33                                    | 13.67                   |
| 9                           | R    | 8.00                                           | 5.00                | 3.00               | 0.00               | 1133                                      | 967            | 0.47                                 | 0.39         | 1.67                        | 320             | 3.33                                                   | 3.00          | 9.67                                     | 13.00                   |
| 10                          | R    | 4.33                                           | 3.33                | 1.00               | 0.00               | 1133                                      | 467            | 0.25                                 | 0.07         | 0.00                        | 0               | 0.00                                                   | 2.00          | 4.33                                     | 4.33                    |
| <b>Mean</b>                 |      | <b>7.53</b>                                    | <b>4.77</b>         | <b>2.57</b>        | <b>0.20</b>        | <b>1490.00</b>                            | <b>863.33</b>  | <b>0.45</b>                          | <b>0.36</b>  | <b>1.73</b>                 | <b>271.00</b>   | <b>2.03</b>                                            | <b>3.50</b>   | <b>9.27</b>                              | <b>11.30</b>            |
| <b>SE</b>                   |      | <b>0.49</b>                                    | <b>0.17</b>         | <b>0.29</b>        | <b>0.11</b>        | <b>94.68</b>                              | <b>55.43</b>   | <b>0.04</b>                          | <b>0.09</b>  | <b>0.33</b>                 | <b>46.63</b>    | <b>0.52</b>                                            | <b>0.22</b>   | <b>0.78</b>                              | <b>1.21</b>             |
| <b>ttest to G1</b>          |      | <b>0.021</b>                                   | <b>0.013</b>        | <b>0.080</b>       | <b>0.175</b>       | <b>0.024</b>                              | <b>0.033</b>   | <b>0.022</b>                         | <b>0.053</b> | <b>0.000</b>                | <b>0.002</b>    | <b>0.107</b>                                           | <b>0.382</b>  | <b>0.927</b>                             | <b>0.480</b>            |
| <b>%</b>                    |      | <b>-35%</b>                                    | <b>-28%</b>         | <b>-40%</b>        | <b>-500%</b>       | <b>-23%</b>                               | <b>-33%</b>    | <b>-38%</b>                          | <b>-137%</b> | <b>51%</b>                  | <b>42%</b>      | <b>-91%</b>                                            | <b>-9%</b>    | <b>-1%</b>                               | <b>-10%</b>             |

\*Cartilage degeneration score=depth (0-5) for each 1/3 then summed (mean of 3 step section)  
\*\*Width of any cartilage lesion (mean of 3 step section)  
\*\*\*Width of cartilage degeneration extending >50% of total thickness (mean of 3 step section)  
#Mean Lesion depth in µm vs depth to tidemark in center of zone in theTibial plateau (mean of 3 step section)  
##Osteophyte scores 1=small up to 299 µm, 2=medium 300-399 µm, 3=large 400-499 µm, 4=very large 500-599 µm, 5=very large ≥600 µm

## 5) IA Tacrolimus (15 ng)

Animals treated with 15 ng IA Tacrolimus once a week had significantly decreased cartilage degeneration scores in zone 2 of the medial tibia (42%). The width of total cartilage degeneration was also significantly decreased (12%). Other general pathology parameters were not significantly affected, although the total joint score was non-significantly reduced by 16%. The width of severe collagen degeneration was significantly decreased by 86%. Cartilage areas and growth plate and MCL thickness were not significantly affected. All animals had minimal to mild subacute synovitis.

Animals treated with 30 ng IA Tacrolimus once a week had significantly decreased cartilage degeneration scores in zone 2 of the medial tibia (35%). Other general pathology parameters were not significantly affected, although the total joint score was non-significantly reduced by 13%. The width of severe collagen degeneration was significantly decreased by 87%. Cartilage areas and growth plate and MCL thickness were not significantly affected. All animals had minimal to mild subacute synovitis.

**Table 50.** Histopathology of MMT/MCLT animals treated with low dose Tacrolimus (Group 5; IA delivery)

| Treatment Group<br>Animal # | Knee | Medial Tibial<br>Cartilage Degeneration Score* |                     |                    |                    | Tibial Cartilage<br>Degeneration<br>Width |                | Depth Ratio<br>Any Matrix<br>Change# |              | Medial Tibial<br>Osteophyte |                 | Medial<br>Femur<br>Cartilage<br>Degeneration<br>Score* | Bone<br>Score | Total<br>Joint<br>Score<br>w/ o<br>Femur | Total<br>Joint<br>Score |
|-----------------------------|------|------------------------------------------------|---------------------|--------------------|--------------------|-------------------------------------------|----------------|--------------------------------------|--------------|-----------------------------|-----------------|--------------------------------------------------------|---------------|------------------------------------------|-------------------------|
|                             |      | 3 Zone<br>total                                | Zone 1<br>(Outside) | Zone 2<br>(Middle) | Zone 3<br>(Inside) | Total<br>(µm)**                           | Sub<br>(µm)*** | Mean                                 | Zone<br>2    | Score<br>##                 | Measure<br>(µm) |                                                        |               |                                          |                         |
|                             |      |                                                |                     |                    |                    |                                           |                |                                      |              |                             |                 |                                                        |               |                                          |                         |
| <b>05<br/>C1</b>            |      |                                                |                     |                    |                    |                                           |                |                                      |              |                             |                 |                                                        |               |                                          |                         |
| 1                           | R    | 2.67                                           | 2.00                | 0.67               | 0.00               | 1100                                      | 267            | 0.06                                 | 0.06         | 3.00                        | 400             | 0.00                                                   | 4.00          | 5.67                                     | 5.67                    |
| 2                           | R    | 3.33                                           | 2.33                | 1.00               | 0.00               | 1067                                      | 333            | 0.14                                 | 0.02         | 3.67                        | 467             | 0.67                                                   | 2.00          | 7.00                                     | 7.67                    |
| 3                           | R    | 3.33                                           | 3.00                | 0.33               | 0.00               | 900                                       | 467            | 0.24                                 | 0.00         | 3.00                        | 443             | 0.00                                                   | 2.00          | 6.33                                     | 6.33                    |
| 4                           | R    | 4.33                                           | 3.33                | 1.00               | 0.00               | 1067                                      | 500            | 0.26                                 | 0.06         | 3.00                        | 433             | 1.67                                                   | 2.00          | 7.33                                     | 9.00                    |
| 5                           | R    | 4.67                                           | 4.00                | 0.67               | 0.00               | 1000                                      | 533            | 0.29                                 | 0.04         | 3.33                        | 447             | 3.67                                                   | 2.00          | 8.00                                     | 11.67                   |
| 6                           | R    | 5.67                                           | 4.00                | 1.67               | 0.00               | 1100                                      | 733            | 0.37                                 | 0.17         | 4.00                        | 500             | 0.00                                                   | 3.00          | 9.67                                     | 9.67                    |
| 7                           | R    | 6.00                                           | 4.33                | 1.67               | 0.00               | 1133                                      | 733            | 0.31                                 | 0.07         | 1.33                        | 267             | 0.33                                                   | 2.00          | 7.33                                     | 7.67                    |
| 8                           | R    | 4.33                                           | 3.33                | 1.00               | 0.00               | 1000                                      | 567            | 0.24                                 | 0.00         | 4.67                        | 583             | 1.00                                                   | 4.00          | 9.00                                     | 10.00                   |
| 9                           | R    | 6.00                                           | 4.33                | 1.67               | 0.00               | 1233                                      | 767            | 0.40                                 | 0.22         | 4.00                        | 500             | 1.00                                                   | 3.00          | 10.00                                    | 11.00                   |
| 10                          | R    | 4.00                                           | 3.00                | 1.00               | 0.00               | 1000                                      | 467            | 0.22                                 | 0.00         | 3.00                        | 427             | 0.33                                                   | 2.00          | 7.00                                     | 7.33                    |
| <b>Mean</b>                 |      | <b>4.43</b>                                    | <b>3.37</b>         | <b>1.07</b>        | <b>0.00</b>        | <b>1060.00</b>                            | <b>536.67</b>  | <b>0.25</b>                          | <b>0.06</b>  | <b>3.30</b>                 | <b>446.67</b>   | <b>0.87</b>                                            | <b>2.60</b>   | <b>7.73</b>                              | <b>8.60</b>             |
| <b>SE</b>                   |      | <b>0.37</b>                                    | <b>0.26</b>         | <b>0.15</b>        | <b>0.00</b>        | <b>28.89</b>                              | <b>53.39</b>   | <b>0.03</b>                          | <b>0.02</b>  | <b>0.28</b>                 | <b>25.81</b>    | <b>0.36</b>                                            | <b>0.27</b>   | <b>0.45</b>                              | <b>0.63</b>             |
| <b>ttest to G1</b>          |      | <b>0.110</b>                                   | <b>0.397</b>        | <b>0.024</b>       | <b>0.331</b>       | <b>0.045</b>                              | <b>0.229</b>   | <b>0.102</b>                         | <b>0.059</b> | <b>0.512</b>                | <b>0.533</b>    | <b>0.645</b>                                           | <b>0.118</b>  | <b>0.115</b>                             | <b>0.140</b>            |
| <b>%</b>                    |      | <b>21%</b>                                     | <b>10%</b>          | <b>42%</b>         | <b>100%</b>        | <b>12%</b>                                | <b>17%</b>     | <b>23%</b>                           | <b>59%</b>   | <b>7%</b>                   | <b>5%</b>       | <b>19%</b>                                             | <b>19%</b>    | <b>16%</b>                               | <b>16%</b>              |

\*Cartilage degeneration score=depth (0-5) for each 1/3 then summed (mean of 3 step section)  
\*\*Width of any cartilage lesion (mean of 3 step section)  
\*\*\*Width of cartilage degeneration extending >50% of total thickness (mean of 3 step section)  
#Mean Lesion depth in µm vs depth to tidemark in center of zone in the Tibial plateau (mean of 3 step section)  
##Osteophyte scores 1=small up to 299 µm, 2=medium 300-399 µm, 3=large 400-499 µm, 4=very large 500-599 µm, 5=very large ≥600 µm

## 6) IA Tacrolimus (30 ng)

**Table 51.** Histopathology of MMT/MCLT animals treated with high dose Tacrolimus (Group 6; IA delivery)

| Treatment Group<br>Animal # | Knee | Medial Tibial<br>Cartilage Degeneration Score* |                     |                    |                    | Tibial Cartilage<br>Degeneration<br>Width |                | Depth Ratio<br>Any Matrix<br>Change# |              | Medial Tibial<br>Osteophyte |                 | Medial<br>Femur<br>Cartilage<br>Degeneration<br>Score* | Bone<br>Score | Total<br>Joint<br>Score<br>w/ o<br>Femur | Total<br>Joint<br>Score |
|-----------------------------|------|------------------------------------------------|---------------------|--------------------|--------------------|-------------------------------------------|----------------|--------------------------------------|--------------|-----------------------------|-----------------|--------------------------------------------------------|---------------|------------------------------------------|-------------------------|
|                             |      | 3 Zone<br>total                                | Zone 1<br>(Outside) | Zone 2<br>(Middle) | Zone 3<br>(Inside) | Total<br>(µm)**                           | Sub<br>(µm)*** | Mean                                 | Zone<br>2    | Score<br>##                 | Measure<br>(µm) |                                                        |               |                                          |                         |
|                             |      |                                                |                     |                    |                    |                                           |                |                                      |              |                             |                 |                                                        |               |                                          |                         |
| <b>06<br/>C2</b>            |      |                                                |                     |                    |                    |                                           |                |                                      |              |                             |                 |                                                        |               |                                          |                         |
| 1                           | R    | 4.67                                           | 4.00                | 0.67               | 0.00               | 1067                                      | 600            | 0.33                                 | 0.11         | 4.33                        | 550             | 0.00                                                   | 3.00          | 9.00                                     | 9.00                    |
| 2                           | R    | 4.67                                           | 3.67                | 1.00               | 0.00               | 1000                                      | 567            | 0.30                                 | 0.05         | 3.33                        | 433             | 0.33                                                   | 4.00          | 8.00                                     | 8.33                    |
| 3                           | R    | 5.00                                           | 4.00                | 1.00               | 0.00               | 1067                                      | 700            | 0.27                                 | 0.11         | 3.00                        | 400             | 1.00                                                   | 2.00          | 8.00                                     | 9.00                    |
| 4                           | R    | 4.00                                           | 3.00                | 1.00               | 0.00               | 900                                       | 433            | 0.20                                 | 0.01         | 2.67                        | 383             | 1.00                                                   | 2.00          | 6.67                                     | 7.67                    |
| 5                           | R    | 4.33                                           | 2.67                | 1.67               | 0.00               | 1333                                      | 533            | 0.30                                 | 0.15         | 3.00                        | 413             | 2.00                                                   | 2.00          | 7.33                                     | 9.33                    |
| 6                           | R    | 3.67                                           | 2.67                | 1.00               | 0.00               | 1067                                      | 367            | 0.19                                 | 0.02         | 2.00                        | 307             | 0.00                                                   | 1.00          | 5.67                                     | 5.67                    |
| 7                           | R    | 6.00                                           | 4.00                | 1.67               | 0.33               | 1233                                      | 733            | 0.36                                 | 0.13         | 5.00                        | 600             | 1.00                                                   | 3.00          | 11.00                                    | 12.00                   |
| 8                           | R    | 3.67                                           | 2.67                | 1.00               | 0.00               | 967                                       | 467            | 0.23                                 | 0.01         | 1.67                        | 273             | 0.67                                                   | 2.00          | 5.33                                     | 6.00                    |
| 9                           | R    | 6.00                                           | 4.33                | 1.67               | 0.00               | 1133                                      | 667            | 0.27                                 | 0.05         | 3.67                        | 497             | 1.00                                                   | 4.00          | 9.67                                     | 10.67                   |
| 10                          | R    | 5.33                                           | 4.00                | 1.33               | 0.00               | 1133                                      | 700            | 0.35                                 | 0.13         | 5.00                        | 717             | 1.00                                                   | 3.00          | 10.33                                    | 11.33                   |
| <b>Mean</b>                 |      | <b>4.73</b>                                    | <b>3.50</b>         | <b>1.20</b>        | <b>0.03</b>        | <b>1090.00</b>                            | <b>576.67</b>  | <b>0.28</b>                          | <b>0.08</b>  | <b>3.37</b>                 | <b>457.33</b>   | <b>0.80</b>                                            | <b>2.60</b>   | <b>8.10</b>                              | <b>8.90</b>             |
| <b>SE</b>                   |      | <b>0.27</b>                                    | <b>0.21</b>         | <b>0.11</b>        | <b>0.03</b>        | <b>40.08</b>                              | <b>39.77</b>   | <b>0.02</b>                          | <b>0.02</b>  | <b>0.36</b>                 | <b>42.89</b>    | <b>0.19</b>                                            | <b>0.31</b>   | <b>0.60</b>                              | <b>0.66</b>             |
| <b>ttest to G1</b>          |      | <b>0.197</b>                                   | <b>0.565</b>        | <b>0.046</b>       | <b>1.000</b>       | <b>0.126</b>                              | <b>0.393</b>   | <b>0.176</b>                         | <b>0.080</b> | <b>0.669</b>                | <b>0.793</b>    | <b>0.389</b>                                           | <b>0.146</b>  | <b>0.279</b>                             | <b>0.233</b>            |
| <b>%</b>                    |      | <b>15%</b>                                     | <b>6%</b>           | <b>35%</b>         | <b>0%</b>          | <b>10%</b>                                | <b>11%</b>     | <b>15%</b>                           | <b>50%</b>   | <b>6%</b>                   | <b>3%</b>       | <b>25%</b>                                             | <b>19%</b>    | <b>12%</b>                               | <b>13%</b>              |

\*Cartilage degeneration score=depth (0-5) for each 1/3 then summed (mean of 3 step section)  
\*\*Width of any cartilage lesion (mean of 3 step section)  
\*\*\*Width of cartilage degeneration extending >50% of total thickness (mean of 3 step section)  
#Mean Lesion depth in µm vs depth to tidemark in center of zone in the Tibial plateau (mean of 3 step section)  
##Osteophyte scores 1=small up to 299 µm, 2=medium 300-399 µm, 3=large 400-499 µm, 4=very large 500-599 µm, 5=very large ≥600 µm

## 7) Fluocinolone (15 ng)

Animals treated with 15 ng IA Fluocinolone once a week were not significantly different from the controls for any parameter. All animals had minimal to moderate subacute synovitis.

**Table 52.** Histopathology of MMT/MCLT animals treated with Fluocinolone (Group 7; IA delivery)

| Treatment Group<br>Animal # | Knee | Medial Tibial<br>Cartilage Degeneration Score* |                     |                    |                    | Tibial Cartilage<br>Degeneration<br>Width |                | Depth Ratio<br>Any Matrix<br>Change# |              | Medial Tibial<br>Osteophyte |                 | Medial<br>Femur<br>Cartilage<br>Degeneration<br>Score* | Bone<br>Score | Total<br>Joint<br>Score<br>w/ o<br>Femur | Total<br>Joint<br>Score |
|-----------------------------|------|------------------------------------------------|---------------------|--------------------|--------------------|-------------------------------------------|----------------|--------------------------------------|--------------|-----------------------------|-----------------|--------------------------------------------------------|---------------|------------------------------------------|-------------------------|
|                             |      | 3 Zone<br>total                                | Zone 1<br>(Outside) | Zone 2<br>(Middle) | Zone 3<br>(Inside) | Total<br>(µm)**                           | Sub<br>(µm)*** | Mean                                 | Zone<br>2    | Score<br>##                 | Measure<br>(µm) |                                                        |               |                                          |                         |
|                             |      |                                                |                     |                    |                    |                                           |                |                                      |              |                             |                 |                                                        |               |                                          |                         |
| <b>07</b>                   |      |                                                |                     |                    |                    |                                           |                |                                      |              |                             |                 |                                                        |               |                                          |                         |
| D                           |      |                                                |                     |                    |                    |                                           |                |                                      |              |                             |                 |                                                        |               |                                          |                         |
| 1                           | R    | 6.00                                           | 5.00                | 1.00               | 0.00               | 1033                                      | 633            | 0.34                                 | 0.03         | 3.67                        | 480             | 0.00                                                   | 2.00          | 9.67                                     | 9.67                    |
| 2                           | R    | 4.67                                           | 3.67                | 1.00               | 0.00               | 1033                                      | 500            | 0.33                                 | 0.02         | 2.67                        | 367             | 1.00                                                   | 2.00          | 7.33                                     | 8.33                    |
| 3                           | R    | 5.33                                           | 4.33                | 1.00               | 0.00               | 933                                       | 533            | 0.33                                 | 0.00         | 2.33                        | 390             | 0.00                                                   | 3.00          | 7.67                                     | 7.67                    |
| 4                           | R    | 4.67                                           | 3.67                | 1.00               | 0.00               | 1033                                      | 533            | 0.30                                 | 0.00         | 3.00                        | 427             | 1.67                                                   | 3.00          | 7.67                                     | 9.33                    |
| 5                           | R    | 5.67                                           | 4.33                | 1.33               | 0.00               | 1200                                      | 667            | 0.35                                 | 0.04         | 4.33                        | 550             | 0.00                                                   | 2.00          | 10.00                                    | 10.00                   |
| 6                           | R    | 5.33                                           | 4.00                | 1.33               | 0.00               | 1033                                      | 700            | 0.30                                 | 0.01         | 4.00                        | 513             | 1.00                                                   | 3.00          | 9.33                                     | 10.33                   |
| 7                           | R    | 7.67                                           | 5.00                | 2.33               | 0.33               | 1100                                      | 867            | 0.40                                 | 0.18         | 3.00                        | 453             | 2.33                                                   | 4.00          | 10.67                                    | 13.00                   |
| 8                           | R    | 3.33                                           | 2.33                | 1.00               | 0.00               | 1067                                      | 267            | 0.08                                 | 0.05         | 3.67                        | 483             | 1.00                                                   | 3.00          | 7.00                                     | 8.00                    |
| 9                           | R    | 5.33                                           | 4.00                | 1.00               | 0.33               | 1367                                      | 633            | 0.37                                 | 0.11         | 5.00                        | 600             | 0.00                                                   | 3.00          | 10.33                                    | 10.33                   |
| 10                          | R    | 6.33                                           | 4.67                | 1.67               | 0.00               | 1267                                      | 733            | 0.39                                 | 0.18         | 4.00                        | 500             | 1.00                                                   | 3.00          | 10.33                                    | 11.33                   |
| <b>Mean</b>                 |      | <b>5.43</b>                                    | <b>4.10</b>         | <b>1.27</b>        | <b>0.07</b>        | <b>1106.67</b>                            | <b>606.67</b>  | <b>0.32</b>                          | <b>0.06</b>  | <b>3.57</b>                 | <b>476.33</b>   | <b>0.80</b>                                            | <b>2.80</b>   | <b>9.00</b>                              | <b>9.80</b>             |
| <b>SE</b>                   |      | <b>0.36</b>                                    | <b>0.25</b>         | <b>0.14</b>        | <b>0.04</b>        | <b>41.51</b>                              | <b>51.11</b>   | <b>0.03</b>                          | <b>0.02</b>  | <b>0.26</b>                 | <b>22.41</b>    | <b>0.25</b>                                            | <b>0.20</b>   | <b>0.45</b>                              | <b>0.51</b>             |
| <b>ttest to G1</b>          |      | <b>0.812</b>                                   | <b>0.392</b>        | <b>0.081</b>       | <b>0.556</b>       | <b>0.189</b>                              | <b>0.635</b>   | <b>0.809</b>                         | <b>0.056</b> | <b>1.000</b>                | <b>0.884</b>    | <b>0.453</b>                                           | <b>0.227</b>  | <b>0.850</b>                             | <b>0.668</b>            |
| <b>%</b>                    |      | <b>3%</b>                                      | <b>-10%</b>         | <b>31%</b>         | <b>-100%</b>       | <b>9%</b>                                 | <b>7%</b>      | <b>3%</b>                            | <b>59%</b>   | <b>0%</b>                   | <b>-1%</b>      | <b>25%</b>                                             | <b>13%</b>    | <b>2%</b>                                | <b>4%</b>               |

\*Cartilage degeneration score=depth (0-5) for each 1/3 then summed (mean of 3 step section)  
 \*\*Width of any cartilage lesion (mean of 3 step section)  
 \*\*\*Width of cartilage degeneration extending >50% of total thickness (mean of 3 step section)  
 #Mean Lesion depth in µm vs depth to tidemark in center of zone in the Tibial plateau (mean of 3 step section)  
 ##Osteophyte scores 1=small up to 299 µm, 2=medium 300-399 µm, 3=large 400-499 µm, 4=very large 500-599 µm, 5=very large ≥600 µm

## 8) Curcumin (30 µg)

Animals treated with 30 µg IA Curcumin once a week had significantly decreased cartilage degeneration scores in zone 2 of the medial tibia (40%). The depth ratio of any matrix change in zone 2 was also significantly decreased (69%). Other general pathology parameters were not significantly affected, although the total joint score was non-significantly reduced by 7%. Collagen degeneration, cartilage areas, and growth plate and MCL thicknesses were not significantly affected. All animals had minimal to moderate subacute synovitis.

**Table 53.** Histopathology of MMT/MCLT animals treated with Curcumin (Group 8; IA delivery)

| Treatment Group<br>Animal # | Knee | Medial Tibial<br>Cartilage Degeneration Score* |                     |                    |                    | Tibial Cartilage<br>Degeneration<br>Width |                | Depth Ratio<br>Any Matrix<br>Change# |              | Medial Tibial<br>Osteophyte |                 | Medial<br>Femur<br>Cartilage<br>Degeneration<br>Score* | Bone<br>Score | Total<br>Joint<br>Score<br>w/ o<br>Femur | Total<br>Joint<br>Score |
|-----------------------------|------|------------------------------------------------|---------------------|--------------------|--------------------|-------------------------------------------|----------------|--------------------------------------|--------------|-----------------------------|-----------------|--------------------------------------------------------|---------------|------------------------------------------|-------------------------|
|                             |      | 3 Zone<br>total                                | Zone 1<br>(Outside) | Zone 2<br>(Middle) | Zone 3<br>(Inside) | Total<br>(µm)**                           | Sub<br>(µm)*** | Mean                                 | Zone<br>2    | Score<br>##                 | Measure<br>(µm) |                                                        |               |                                          |                         |
|                             |      |                                                |                     |                    |                    |                                           |                |                                      |              |                             |                 |                                                        |               |                                          |                         |
| <b>08</b>                   |      |                                                |                     |                    |                    |                                           |                |                                      |              |                             |                 |                                                        |               |                                          |                         |
| E                           |      |                                                |                     |                    |                    |                                           |                |                                      |              |                             |                 |                                                        |               |                                          |                         |
| 1                           | R    | 4.00                                           | 3.67                | 0.33               | 0.00               | 900                                       | 533            | 0.24                                 | 0.00         | 3.00                        | 427             | 1.00                                                   | 3.00          | 7.00                                     | 8.00                    |
| 2                           | R    | 5.33                                           | 4.00                | 1.00               | 0.33               | 1600                                      | 633            | 0.30                                 | 0.01         | 2.33                        | 360             | 1.33                                                   | 3.00          | 7.67                                     | 9.00                    |
| 3                           | R    | 6.67                                           | 4.67                | 1.67               | 0.33               | 1333                                      | 700            | 0.34                                 | 0.02         | 4.00                        | 517             | 0.67                                                   | 4.00          | 10.67                                    | 11.33                   |
| 4                           | R    | 5.67                                           | 4.33                | 1.33               | 0.00               | 1000                                      | 667            | 0.30                                 | 0.00         | 3.00                        | 433             | 1.00                                                   | 4.00          | 8.67                                     | 9.67                    |
| 5                           | R    | 3.67                                           | 3.33                | 0.33               | 0.00               | 1000                                      | 400            | 0.31                                 | 0.02         | 3.00                        | 417             | 6.00                                                   | 3.00          | 6.67                                     | 12.67                   |
| 6                           | R    | 4.00                                           | 3.00                | 1.00               | 0.00               | 967                                       | 467            | 0.20                                 | 0.02         | 2.33                        | 340             | 0.33                                                   | 4.00          | 6.33                                     | 6.67                    |
| 7                           | R    | 5.33                                           | 4.00                | 1.33               | 0.00               | 1067                                      | 633            | 0.32                                 | 0.08         | 4.00                        | 533             | 0.67                                                   | 2.00          | 9.33                                     | 10.00                   |
| 8                           | R    | 6.33                                           | 4.67                | 1.67               | 0.00               | 1067                                      | 733            | 0.36                                 | 0.09         | 4.33                        | 550             | 4.33                                                   | 4.00          | 10.67                                    | 15.00                   |
| 9                           | R    | 4.67                                           | 3.67                | 1.00               | 0.00               | 967                                       | 500            | 0.27                                 | 0.03         | 3.33                        | 447             | 0.00                                                   | 2.00          | 8.00                                     | 8.00                    |
| 10                          | R    | 3.33                                           | 2.00                | 1.33               | 0.00               | 1267                                      | 333            | 0.21                                 | 0.20         | 1.00                        | 220             | 1.00                                                   | 1.00          | 4.33                                     | 5.33                    |
| <b>Mean</b>                 |      | <b>4.90</b>                                    | <b>3.73</b>         | <b>1.10</b>        | <b>0.07</b>        | <b>1116.67</b>                            | <b>560.00</b>  | <b>0.29</b>                          | <b>0.05</b>  | <b>3.03</b>                 | <b>424.33</b>   | <b>1.63</b>                                            | <b>3.00</b>   | <b>7.93</b>                              | <b>9.57</b>             |
| <b>SE</b>                   |      | <b>0.36</b>                                    | <b>0.26</b>         | <b>0.15</b>        | <b>0.04</b>        | <b>68.90</b>                              | <b>42.40</b>   | <b>0.02</b>                          | <b>0.02</b>  | <b>0.31</b>                 | <b>31.60</b>    | <b>0.61</b>                                            | <b>0.33</b>   | <b>0.63</b>                              | <b>0.91</b>             |
| <b>ttest to G1</b>          |      | <b>0.324</b>                                   | <b>1.000</b>        | <b>0.030</b>       | <b>0.556</b>       | <b>0.332</b>                              | <b>0.304</b>   | <b>0.233</b>                         | <b>0.023</b> | <b>0.220</b>                | <b>0.286</b>    | <b>0.400</b>                                           | <b>0.637</b>  | <b>0.220</b>                             | <b>0.599</b>            |
| <b>%</b>                    |      | <b>13%</b>                                     | <b>0%</b>           | <b>40%</b>         | <b>-100%</b>       | <b>8%</b>                                 | <b>14%</b>     | <b>13%</b>                           | <b>69%</b>   | <b>15%</b>                  | <b>10%</b>      | <b>-53%</b>                                            | <b>6%</b>     | <b>13%</b>                               | <b>7%</b>               |

\*Cartilage degeneration score=depth (0-5) for each 1/3 then summed (mean of 3 step section)  
 \*\*Width of any cartilage lesion (mean of 3 step section)  
 \*\*\*Width of cartilage degeneration extending >50% of total thickness (mean of 3 step section)  
 #Mean Lesion depth in µm vs depth to tidemark in center of zone in the Tibial plateau (mean of 3 step section)  
 ##Osteophyte scores 1=small up to 299 µm, 2=medium 300-399 µm, 3=large 400-499 µm, 4=very large 500-599 µm, 5=very large ≥600 µm

## Conclusions

The histopathology results in this study were the most informative and indicated that treatment with IA Clonidine, Tacrolimus, or Curcumin had minor, sporadically significant beneficial effects on histopathology parameters of medial meniscal tear induced osteoarthritis in rats in conjunction with increased synovitis and evidence of decreased load bearing. Fluocinolone at this dose had no effect and Triamcinolone hexacetonide significantly increased lesion development, in conjunction with decreased growth plate width and MCL thickness, hypocellular fibrous repair, and bone marrow hypocellularity. It is possible that these observations were the result of increased use of the limb (less pain), although the weight bearing measure did not completely reflect this.

No treatment had consistently significant effects on load bearing, but this may have been due to the measuring weight bearing immediately following IA injections. All IA injections sporadically decreased weight bearing on the injured leg, and to a significant degree compared to the controls. (For this reason results from load bearing are not included here.) Systemic clonidine treatment had minimal, non-significant effects on load bearing at one hour only on days 7 and 21, but was generally unimpressive. Daily clonidine treatment may have given more positive results as the half-life of clonidine is between 6-24 hours. The increased lesion severity relative to the saline treated controls (IA treatment) is a result of IA treatment being compared to SC treatment. IA saline injections consistently decrease lesion severity in this model and the degree of decrease is directly related to frequency and timing of injections post-surgery.

## Appendix

### Experimental design / drug key

**Table 54.** Experimental Design and Key for MIA Trial 1.

| Group (Termed)     | Compound               | Dose      | Volume (ml/kg) | Route of Admin | Group size (n) |
|--------------------|------------------------|-----------|----------------|----------------|----------------|
| 1 (Day 28)         | Saline Vehicle Control | 5 ml/kg   | 5              | s.c.           | 10             |
| 2                  | Clonidine              | 0.1 mg/kg | 5              | s.c.           | 10             |
| 3                  | Fluocinolone           | 2 ug/kg   | 5              | s.c.           | 10             |
| 4                  | Morphine               | 6 mg/kg   | 5              | s.c.           | 10             |
| (Day 07) Histology | Vehicle Saline         | 5 ml/kg   | 5              | s.c.           | 3              |
| (Day 14) Histology | Vehicle Saline         | 5 ml/kg   | 5              | s.c.           | 3              |
| (Day 21) Histology | Vehicle Saline         | 5 ml/kg   | 5              | s.c.           | 3              |

**Table 55.** Experimental Design and Key for MIA Trial 2.

| Group | Compound                     | Dose (mg/kg) | Volume (ml/kg) | Route of Admin | Group size (n) |
|-------|------------------------------|--------------|----------------|----------------|----------------|
| 1     | Saline Vehicle Control       | NA           | 5              | s.c.           | 10             |
| 3     | A1 Tacrolimus                | 0.3          | 1              | i.p.           | 10             |
| 4     | A2 Tacrolimus                | 0.6          | 1              | i.p.           | 10             |
| 5     | B Curcumin                   | 50           | 5              | p.o. gavage    | 10             |
| 6     | C Fluocinolone               | 0.01         | 5              | s.c.           | 10             |
| 2     | Clonidine Control (systemic) | 0.1          | 5              | s.c.           | 10             |

**Table 56.** Experimental Design and Key for MIA Trial 3.

| Group | Compound                     | Dose      | Volume | Route of Admin | Group size (n) |
|-------|------------------------------|-----------|--------|----------------|----------------|
| 1     | Saline Vehicle Control       | n.a.      | 30 µl  | i.a.           | 10             |
| 2     | Clonidine Control (systemic) | 100 µg/kg | 30 µl  | s.c.           | 10             |
| 3     | A Clonidine                  | 4.5 µg    | 30 µl  | i.a.           | 10             |
| 4     | B Tacrolimus                 | 30 ng     | 30 µl  | i.a.           | 10             |
| 5     | C Fluocinolone               | 15 ng     | 30 µl  | i.a.           | 10             |
| 6     | D Meloxicam                  | 100 µg    | 30 µl  | i.a.           | 10             |
| 7     | E Tranilast                  | 500 ng    | 30 µl  | i.a.           | 10             |
| 8     | F Triamcinolone Hex          | 150 ug    | 30 µl  | i.a.           | 10             |

**Table 57.** Experimental Design and Key for MMT/MCLT Trial 1.

| Group | Compound             | Dose      | Route of Admin | Group Size (n) |
|-------|----------------------|-----------|----------------|----------------|
| 1     | Vehicle (Saline)     |           | i.p.           | 8              |
| 2     | Morphine             | 10 mg/kg  | i.p.           | 8              |
| 3     | A1 Tacrolimus low    | 0.3 mg/kg | i.p.           | 8              |
| 4     | A2 Tacrolimus high   | 0.6 mg/kg | i.p.           | 8              |
| 5     | B1 Fluocinolone low  | 5 ug/kg   | i.p.           | 8              |
| 6     | B2 Fluocinolone high | 10 ug/kg  | i.p.           | 8              |
| 7     | C1 Clonidine         | 100 ug/kg | i.p.           | 8              |
| 8     | D1 Alendronate       | 10 ug/kg  | i.p.           | 8              |
| 9     | E1 Curcumin          | 50 mg/kg  | p.o.           | 8              |
| 10    | F1 Withaferin        | 50 mg/kg  | p.o.           | 8              |

**Table 58.** Experimental Design and Key for MMT/MCLT Trial 2.

| Group | Compound               | Dose      | Volume | Route of Admin | Group Size (n) |
|-------|------------------------|-----------|--------|----------------|----------------|
| 1     | Saline Vehicle Control | n.a.      | 30 µl  | i.a.           | 10             |
| 2     | Clonidine              | 100 µg/kg | 30 µl  | s.c.           | 10             |
| 3     | Drug A - Clonidine     | 4.5 µg    | 30 µl  | i.a.           | 10             |
| 4     | Drug B - Triamcinolone | 0.15 mg   | 30 µl  | i.a.           | 10             |
| 5     | Drug C1 - Tacrolimus   | 15 ng     | 30 µl  | i.a.           | 10             |
| 6     | Drug C2 - Tacrolimus   | 30 ng     | 30 µl  | i.a.           | 10             |
| 7     | Drug D - Fluocinolone  | 15 ng     | 30 µl  | i.a.           | 10             |
| 8     | Drug E - Curcumin      | 30 µg     | 30 µl  | i.a.           | 10             |

## Weight Bearing Data for MIA Trial 1

**Table 59.** Individual animal WB score data for MIA Trial 1 Day 7. Scores calculated as indicated in the methods.

| Rat # | Treatment                    | Weight Bearing Score (%) |                |              |              |              |               |
|-------|------------------------------|--------------------------|----------------|--------------|--------------|--------------|---------------|
|       |                              | Pre-MIA Baseline         | Day 7 Baseline | Day 7 1 hour | Day 7 3 hour | Day 7 5 hour | Day 7 24 hour |
| 14    | Vehicle (5 ml/kg, s.c.)      | 49.5                     | 34.7           | 33.7         | 23.5         | 40.6         | 28.7          |
| 17    | Vehicle (5 ml/kg, s.c.)      | 51.7                     | 15.7           | 29.4         | 40.9         | 32.2         | 28.8          |
| 23    | Vehicle (5 ml/kg, s.c.)      | 48.2                     | 34.9           | 19.7         | 16.7         | 21.5         | 27.6          |
| 30    | Vehicle (5 ml/kg, s.c.)      | 53.0                     | 27.9           | 43.2         | 38.4         | 36.8         | 32.0          |
| 31    | Vehicle (5 ml/kg, s.c.)      | 47.7                     | 36.2           | 36.1         | 34.9         | 42.3         | 28.2          |
| 40    | Vehicle (5 ml/kg, s.c.)      | 50.1                     | 33.2           | 12.3         | 29.2         | 22.4         | 35.6          |
| 41    | Vehicle (5 ml/kg, s.c.)      | 51.7                     | 23.3           | 18.3         | 33.2         | 20.7         | 31.6          |
| 43    | Vehicle (5 ml/kg, s.c.)      | 50.9                     | 30.2           | 51.5         | 22.4         | 40.9         | 36.4          |
| 49    | Vehicle (5 ml/kg, s.c.)      | 50.5                     | 28.8           | 30.9         | 35.9         | 23.1         | 32.3          |
| 57    | Vehicle (5 ml/kg, s.c.)      | 47.9                     | 29.4           | 43.7         | 23.6         | 30.9         | 34.8          |
| 10    | Clonidine (100 µg/kg, s.c.)  | 51.5                     | 36.5           | 62.3         | 41.3         | 41.2         | 37.2          |
| 11    | Clonidine (100 µg/kg, s.c.)  | 49.8                     | 16.7           | 24.5         | 49.4         | 42.1         | 36.1          |
| 18    | Clonidine (100 µg/kg, s.c.)  | 49.6                     | 29.6           | 44.0         | 36.7         | 42.3         | 36.4          |
| 28    | Clonidine (100 µg/kg, s.c.)  | 48.6                     | 21.4           | 42.8         | 18.7         | 37.0         | 34.6          |
| 32    | Clonidine (100 µg/kg, s.c.)  | 49.6                     | 32.2           | 55.3         | 38.1         | 45.0         | 29.5          |
| 35    | Clonidine (100 µg/kg, s.c.)  | 49.2                     | 28.1           | 54.2         | 39.4         | 34.8         | 30.1          |
| 36    | Clonidine (100 µg/kg, s.c.)  | 50.5                     | 30.9           | 25.6         | 24.8         | 24.0         | 32.6          |
| 37    | Clonidine (100 µg/kg, s.c.)  | 48.9                     | 34.7           | 51.1         | 50.7         | 39.4         | 37.8          |
| 44    | Clonidine (100 µg/kg, s.c.)  | 47.1                     | 35.5           | 54.2         | 23.5         | 41.4         | 38.9          |
| 45    | Clonidine (100 µg/kg, s.c.)  | 48.7                     | 29.0           | 36.7         | 35.9         | 36.9         | 34.2          |
| 4     | Fluocinolone (2 µg/kg, s.c.) | 50.7                     | 24.6           | 39.8         | 40.5         | 32.5         | 27.9          |
| 13    | Fluocinolone (2 µg/kg, s.c.) | 49.9                     | 29.0           | 28.5         | 29.3         | 16.7         | 33.5          |
| 15    | Fluocinolone (2 µg/kg, s.c.) | 48.9                     | 32.2           | 24.8         | 39.4         | 50.3         | 42.9          |
| 16    | Fluocinolone (2 µg/kg, s.c.) | 50.4                     | 36.5           | 52.6         | 52.3         | 47.7         | 28.4          |
| 25    | Fluocinolone (2 µg/kg, s.c.) | 50.5                     | 33.6           | 33.5         | 48.3         | 24.7         | 32.8          |
| 34    | Fluocinolone (2 µg/kg, s.c.) | 47.3                     | 16.9           | 26.5         | 22.1         | 29.5         | 30.6          |
| 39    | Fluocinolone (2 µg/kg, s.c.) | 51.3                     | 21.5           | 48.8         | 14.5         | 14.9         | 17.6          |
| 42    | Fluocinolone (2 µg/kg, s.c.) | 49.9                     | 35.9           | 46.2         | 24.4         | 43.6         | 40.6          |
| 47    | Fluocinolone (2 µg/kg, s.c.) | 50.6                     | 31.5           | 59.0         | 58.2         | 44.3         | 39.9          |
| 58    | Fluocinolone (2 µg/kg, s.c.) | 50.8                     | 29.7           | 57.5         | 55.9         | 31.5         | 33.6          |
| 1     | Morphine (6 mg/kg, s.c.)     | 55.5                     | 37.0           | 55.7         | 48.4         | 40.3         | 38.8          |
| 2     | Morphine (6 mg/kg, s.c.)     | 50.2                     | 17.1           | 43.3         | 48.4         | 44.7         | 34.3          |
| 6     | Morphine (6 mg/kg, s.c.)     | 50.4                     | 33.0           | 29.3         | 39.4         | 33.9         | 42.7          |
| 7     | Morphine (6 mg/kg, s.c.)     | 51.5                     | 34.3           | 53.1         | 40.2         | 33.6         | 25.9          |
| 8     | Morphine (6 mg/kg, s.c.)     | 52.2                     | 31.7           | 45.1         | 53.0         | 31.0         | 42.9          |
| 19    | Morphine (6 mg/kg, s.c.)     | 53.4                     | 29.9           | 53.0         | 36.1         | 42.1         | 34.9          |
| 20    | Morphine (6 mg/kg, s.c.)     | 49.4                     | 24.9           | 42.2         | 40.6         | 47.8         | 36.4          |
| 26    | Morphine (6 mg/kg, s.c.)     | 47.9                     | 28.2           | 41.0         | 43.6         | 46.8         | 26.1          |
| 48    | Morphine (6 mg/kg, s.c.)     | 51.3                     | 22.1           | 36.9         | 31.7         | 38.2         | 32.6          |
| 50    | Morphine (6 mg/kg, s.c.)     | 52.3                     | 34.9           | 51.5         | 40.0         | 30.9         | 37.5          |
| 12    | Vehicle (5 ml/kg, s.c.)      | 52.0                     | 29.3           |              |              |              |               |
| 22    | Vehicle (5 ml/kg, s.c.)      | 49.7                     | 25.2           |              |              |              |               |
| 29    | Vehicle (5 ml/kg, s.c.)      | 51.0                     | 32.1           |              |              |              |               |
| 38    | Vehicle (5 ml/kg, s.c.)      | 47.2                     | 34.4           |              |              |              |               |
| 46    | Vehicle (5 ml/kg, s.c.)      | 47.1                     | 19.9           |              |              |              |               |
| 52    | Vehicle (5 ml/kg, s.c.)      | 49.0                     | 22.5           |              |              |              |               |
| 54    | Vehicle (5 ml/kg, s.c.)      | 48.0                     | 28.8           |              |              |              |               |
| 55    | Vehicle (5 ml/kg, s.c.)      | 51.3                     | 33.1           |              |              |              |               |
| 56    | Vehicle (5 ml/kg, s.c.)      | 51.3                     | 34.9           |              |              |              |               |
| 3     | No Treatment                 | 49.7                     | 39.2           |              |              |              |               |
| 21    | No Treatment                 | 50.8                     | 37.6           |              |              |              |               |



**Table 60.** Individual animal WB score data for MIA Trial 1 Day 14.

| Rat # | Treatment                    | Weight Bearing Score (%) |               |               |               |                |
|-------|------------------------------|--------------------------|---------------|---------------|---------------|----------------|
|       |                              | Day 14 Baseline          | Day 14 1 hour | Day 14 3 hour | Day 14 5 hour | Day 14 24 hour |
| 14    | Vehicle (5 ml/kg, s.c.)      | 30.2                     | 20.3          | 12.7          | 37.5          | 33.4           |
| 17    | Vehicle (5 ml/kg, s.c.)      | 27.5                     | 14.8          | 26.8          | 20.3          | 27.0           |
| 23    | Vehicle (5 ml/kg, s.c.)      | 21.5                     | 48.0          | 34.6          | 48.2          | 30.6           |
| 30    | Vehicle (5 ml/kg, s.c.)      | 21.1                     | 18.8          | 24.0          | 17.6          | 31.4           |
| 31    | Vehicle (5 ml/kg, s.c.)      | 23.2                     | 25.7          | 38.9          | 38.4          | 36.8           |
| 40    | Vehicle (5 ml/kg, s.c.)      | 21.5                     | 22.3          | 36.2          | 32.4          | 25.0           |
| 41    | Vehicle (5 ml/kg, s.c.)      | 24.6                     | 27.3          | 33.2          | 35.0          | 27.9           |
| 43    | Vehicle (5 ml/kg, s.c.)      | 27.3                     | 26.9          | 33.6          | 34.4          | 32.7           |
| 49    | Vehicle (5 ml/kg, s.c.)      | 35.0                     | 21.5          | 16.7          | 48.2          | 25.7           |
| 57    | Vehicle (5 ml/kg, s.c.)      | 39.3                     | 44.4          | 50.5          | 42.5          | 37.7           |
| 10    | Clonidine (100 µg/kg, s.c.)  | 35.4                     | 42.1          | 49.3          | 29.4          | 39.4           |
| 11    | Clonidine (100 µg/kg, s.c.)  | 43.6                     | 37.6          | 46.7          | 28.0          | 40.5           |
| 18    | Clonidine (100 µg/kg, s.c.)  | 23.0                     | 31.6          | 20.4          | 28.1          | 26.5           |
| 28    | Clonidine (100 µg/kg, s.c.)  | 34.9                     | 44.2          | 14.1          | 25.8          | 25.1           |
| 32    | Clonidine (100 µg/kg, s.c.)  | 26.5                     | 45.8          | 46.9          | 27.1          | 24.4           |
| 35    | Clonidine (100 µg/kg, s.c.)  | 23.8                     | 45.3          | 38.0          | 33.4          | 33.0           |
| 36    | Clonidine (100 µg/kg, s.c.)  | 18.8                     | 24.9          | 47.0          | 20.9          | 26.1           |
| 37    | Clonidine (100 µg/kg, s.c.)  | 42.8                     | 49.1          | 28.3          | 37.8          | 34.2           |
| 44    | Clonidine (100 µg/kg, s.c.)  | 29.5                     | 30.4          | 26.6          | 45.7          | 16.6           |
| 45    | Clonidine (100 µg/kg, s.c.)  | 28.7                     | 23.3          | 34.3          | 34.5          | 32.9           |
| 4     | Fluocinolone (2 µg/kg, s.c.) | 44.6                     | 45.5          | 45.6          | 42.4          | 43.5           |
| 13    | Fluocinolone (2 µg/kg, s.c.) | 23.6                     | 10.6          | 20.9          | 22.9          | 34.9           |
| 15    | Fluocinolone (2 µg/kg, s.c.) | 44.0                     | 35.1          | 37.9          | 35.1          | 42.8           |
| 16    | Fluocinolone (2 µg/kg, s.c.) | 46.2                     | 31.4          | 40.0          | 40.4          | 40.1           |
| 25    | Fluocinolone (2 µg/kg, s.c.) | 30.2                     | 44.0          | 34.7          | 34.2          | 29.1           |
| 34    | Fluocinolone (2 µg/kg, s.c.) | 20.5                     | 30.9          | 20.1          | 28.2          | 25.8           |
| 39    | Fluocinolone (2 µg/kg, s.c.) | 31.2                     | 14.4          | 15.9          | 15.3          | 19.1           |
| 42    | Fluocinolone (2 µg/kg, s.c.) | 36.2                     | 27.9          | 40.4          | 37.1          | 33.4           |
| 47    | Fluocinolone (2 µg/kg, s.c.) | 34.1                     | 33.8          | 39.3          | 35.9          | 41.4           |
| 58    | Fluocinolone (2 µg/kg, s.c.) | 26.7                     | 32.9          | 17.5          | 48.0          | 36.3           |
| 1     | Morphine (6 mg/kg, s.c.)     | 37.6                     | 40.9          | 46.8          | 38.2          | 32.8           |
| 2     | Morphine (6 mg/kg, s.c.)     | 43.3                     | 44.7          | 48.5          | 38.6          | 32.3           |
| 6     | Morphine (6 mg/kg, s.c.)     | 38.0                     | 37.3          | 42.3          | 47.3          | 28.9           |
| 7     | Morphine (6 mg/kg, s.c.)     | 33.8                     | 30.4          | 30.4          | 34.8          | 30.7           |
| 8     | Morphine (6 mg/kg, s.c.)     | 41.5                     | 44.7          | 43.4          | 44.4          | 35.2           |
| 19    | Morphine (6 mg/kg, s.c.)     | 23.3                     | 47.1          | 28.6          | 24.7          | 34.3           |
| 20    | Morphine (6 mg/kg, s.c.)     | 32.2                     | 35.2          | 35.2          | 32.0          | 23.7           |
| 26    | Morphine (6 mg/kg, s.c.)     | 17.4                     | 46.9          | 41.0          | 39.3          | 28.0           |
| 48    | Morphine (6 mg/kg, s.c.)     | 30.4                     | 36.8          | 32.7          | 42.9          | 25.9           |
| 50    | Morphine (6 mg/kg, s.c.)     | 26.7                     | 41.4          | 26.9          | 31.9          | 29.4           |
| 12    | Vehicle (5 ml/kg, s.c.)      | 16.6                     |               |               |               |                |
| 22    | Vehicle (5 ml/kg, s.c.)      | 24.2                     |               |               |               |                |
| 29    | Vehicle (5 ml/kg, s.c.)      | 42.5                     |               |               |               |                |
| 38    | Vehicle (5 ml/kg, s.c.)      | 46.4                     |               |               |               |                |
| 46    | Vehicle (5 ml/kg, s.c.)      | 38.4                     |               |               |               |                |
| 52    | Vehicle (5 ml/kg, s.c.)      | 32.4                     |               |               |               |                |
| 54    | Vehicle (5 ml/kg, s.c.)      |                          |               |               |               |                |
| 55    | Vehicle (5 ml/kg, s.c.)      |                          |               |               |               |                |
| 56    | Vehicle (5 ml/kg, s.c.)      |                          |               |               |               |                |
| 3     | No Treatment                 |                          |               |               |               |                |
| 21    | No Treatment                 |                          |               |               |               |                |

**Table 61.** Individual animal WB score data for MIA Trial 1 Day 21.

| Rat # | Treatment                    | Weight Bearing Score (%) |               |               |               |                |
|-------|------------------------------|--------------------------|---------------|---------------|---------------|----------------|
|       |                              | Day 21 Baseline          | Day 21 1 hour | Day 21 3 hour | Day 21 5 hour | Day 21 24 hour |
| 14    | Vehicle (5 ml/kg, s.c.)      | 28.8                     | 30.3          | 20.6          | 27.5          | 36.5           |
| 17    | Vehicle (5 ml/kg, s.c.)      | 26.1                     | 35.0          | 26.8          | 39.3          | 26.1           |
| 23    | Vehicle (5 ml/kg, s.c.)      | 21.8                     | 19.2          | 30.7          | 22.9          | 24.9           |
| 30    | Vehicle (5 ml/kg, s.c.)      | 22.7                     | 27.6          | 17.6          | 16.4          | 24.8           |
| 31    | Vehicle (5 ml/kg, s.c.)      | 27.4                     | 40.9          | 34.7          | 31.8          | 26.2           |
| 40    | Vehicle (5 ml/kg, s.c.)      | 15.5                     | 23.4          | 25.4          | 27.8          | 38.5           |
| 41    | Vehicle (5 ml/kg, s.c.)      | 20.8                     | 29.3          | 24.7          | 21.2          | 32.4           |
| 43    | Vehicle (5 ml/kg, s.c.)      | 25.4                     | 27.7          | 37.0          | 26.1          | 32.1           |
| 49    | Vehicle (5 ml/kg, s.c.)      | 22.3                     | 20.6          | 25.0          | 24.8          | 17.1           |
| 57    | Vehicle (5 ml/kg, s.c.)      | 33.4                     | 30.5          | 38.2          | 37.0          | 28.7           |
| 10    | Clonidine (100 µg/kg, s.c.)  | 30.0                     | 40.2          | 39.9          | 25.1          | 32.7           |
| 11    | Clonidine (100 µg/kg, s.c.)  | 22.9                     | 33.4          | 28.8          | 31.9          | 36.1           |
| 18    | Clonidine (100 µg/kg, s.c.)  | 27.5                     | 35.7          | 29.3          | 21.0          | 31.1           |
| 28    | Clonidine (100 µg/kg, s.c.)  | 28.2                     | 42.1          | 39.3          | 34.0          | 27.2           |
| 32    | Clonidine (100 µg/kg, s.c.)  | 26.8                     | 35.8          | 30.7          | 32.6          | 30.9           |
| 35    | Clonidine (100 µg/kg, s.c.)  | 32.6                     | 47.5          | 44.5          | 34.6          | 23.0           |
| 36    | Clonidine (100 µg/kg, s.c.)  | 24.2                     | 42.4          | 18.7          | 27.1          | 23.2           |
| 37    | Clonidine (100 µg/kg, s.c.)  | 36.6                     | 48.3          | 46.1          | 38.9          | 40.6           |
| 44    | Clonidine (100 µg/kg, s.c.)  | 26.2                     | 49.0          | 46.5          | 38.4          | 35.5           |
| 45    | Clonidine (100 µg/kg, s.c.)  | 29.5                     | 45.8          | 28.5          | 27.0          | 21.0           |
| 4     | Fluocinolone (2 µg/kg, s.c.) | 38.8                     | 45.9          | 47.5          | 31.7          | 36.3           |
| 13    | Fluocinolone (2 µg/kg, s.c.) | 29.7                     | 31.0          | 27.8          | 23.8          | 23.4           |
| 15    | Fluocinolone (2 µg/kg, s.c.) | 22.6                     | 33.4          | 24.6          | 25.4          | 33.1           |
| 16    | Fluocinolone (2 µg/kg, s.c.) | 43.0                     | 41.6          | 46.4          | 30.8          | 43.8           |
| 25    | Fluocinolone (2 µg/kg, s.c.) | 41.8                     | 27.9          | 31.5          | 22.2          | 30.5           |
| 34    | Fluocinolone (2 µg/kg, s.c.) | 23.4                     | 31.4          | 21.2          | 25.7          | 26.2           |
| 39    | Fluocinolone (2 µg/kg, s.c.) | 21.6                     | 26.9          | 18.5          | 19.9          | 27.3           |
| 42    | Fluocinolone (2 µg/kg, s.c.) | 33.2                     | 41.6          | 31.2          | 29.0          | 20.3           |
| 47    | Fluocinolone (2 µg/kg, s.c.) | 29.2                     | 45.6          | 29.3          | 28.2          | 36.8           |
| 58    | Fluocinolone (2 µg/kg, s.c.) | 35.7                     | 43.6          | 26.0          | 34.0          | 24.1           |
| 1     | Morphine (6 mg/kg, s.c.)     | 24.5                     | 43.6          | 42.9          | 30.0          | 30.5           |
| 2     | Morphine (6 mg/kg, s.c.)     | 37.2                     | 45.1          | 42.6          | 43.3          | 29.3           |
| 6     | Morphine (6 mg/kg, s.c.)     | 30.5                     | 48.2          | 39.8          | 23.8          | 25.8           |
| 7     | Morphine (6 mg/kg, s.c.)     | 32.2                     | 48.2          | 40.1          | 21.6          | 32.9           |
| 8     | Morphine (6 mg/kg, s.c.)     | 37.2                     | 38.8          | 44.5          | 39.4          | 37.3           |
| 19    | Morphine (6 mg/kg, s.c.)     | 29.1                     | 36.8          | 34.2          | 28.2          | 23.3           |
| 20    | Morphine (6 mg/kg, s.c.)     | 39.1                     | 40.2          | 26.2          | 31.4          | 35.6           |
| 26    | Morphine (6 mg/kg, s.c.)     | 37.3                     | 35.1          | 32.2          | 25.0          | 27.4           |
| 48    | Morphine (6 mg/kg, s.c.)     | 37.7                     | 37.4          | 42.1          | 30.1          | 16.2           |
| 50    | Morphine (6 mg/kg, s.c.)     | 21.1                     | 47.3          | 40.1          | 26.7          | 34.2           |
| 12    | Vehicle (5 ml/kg, s.c.)      | 41.0                     |               |               |               |                |
| 22    | Vehicle (5 ml/kg, s.c.)      | 25.5                     |               |               |               |                |
| 29    | Vehicle (5 ml/kg, s.c.)      | 44.6                     |               |               |               |                |
| 38    | Vehicle (5 ml/kg, s.c.)      |                          |               |               |               |                |
| 46    | Vehicle (5 ml/kg, s.c.)      |                          |               |               |               |                |
| 52    | Vehicle (5 ml/kg, s.c.)      |                          |               |               |               |                |
| 54    | Vehicle (5 ml/kg, s.c.)      |                          |               |               |               |                |
| 55    | Vehicle (5 ml/kg, s.c.)      |                          |               |               |               |                |
| 56    | Vehicle (5 ml/kg, s.c.)      |                          |               |               |               |                |
| 3     | No Treatment                 | 26.0                     |               |               |               |                |
| 21    | No Treatment                 | 19.5                     |               |               |               |                |

**Table 62.** Individual animal WB score data for MIA Trial 1 Day 28.

| Rat # | Treatment                    | Weight Bearing Score (%) |               |               |               |                |
|-------|------------------------------|--------------------------|---------------|---------------|---------------|----------------|
|       |                              | Day 28 Baseline          | Day 28 1 hour | Day 28 3 hour | Day 28 5 hour | Day 28 24 hour |
| 14    | Vehicle (5 ml/kg, s.c.)      | 26.7                     | 31.6          | 24.6          | 23.2          | 31.0           |
| 17    | Vehicle (5 ml/kg, s.c.)      | 31.2                     | 19.7          | 25.6          | 29.4          | 29.9           |
| 23    | Vehicle (5 ml/kg, s.c.)      | 26.1                     | 28.4          | 40.3          | 23.2          | 21.9           |
| 30    | Vehicle (5 ml/kg, s.c.)      | 26.5                     | 25.9          | 21.8          | 30.4          | 35.0           |
| 31    | Vehicle (5 ml/kg, s.c.)      | 32.2                     | 47.1          | 26.3          | 34.5          | 30.1           |
| 40    | Vehicle (5 ml/kg, s.c.)      | 29.1                     | 27.3          | 18.9          | 24.9          | 24.5           |
| 41    | Vehicle (5 ml/kg, s.c.)      | 26.3                     | 20.4          | 31.4          | 32.6          | 28.6           |
| 43    | Vehicle (5 ml/kg, s.c.)      | 35.8                     | 30.0          | 30.2          | 35.9          | 28.3           |
| 49    | Vehicle (5 ml/kg, s.c.)      | 29.1                     | 28.1          | 36.3          | 35.4          | 22.8           |
| 57    | Vehicle (5 ml/kg, s.c.)      | 34.1                     | 40.0          | 38.0          | 40.2          | 34.1           |
| 10    | Clonidine (100 µg/kg, s.c.)  | 30.2                     | 48.7          | 41.1          | 39.4          | 34.1           |
| 11    | Clonidine (100 µg/kg, s.c.)  | 32.4                     | 34.5          | 35.5          | 31.5          | 31.9           |
| 18    | Clonidine (100 µg/kg, s.c.)  | 34.0                     | 43.1          | 27.1          | 30.0          | 29.1           |
| 28    | Clonidine (100 µg/kg, s.c.)  | 34.1                     | 33.9          | 28.5          | 17.4          | 26.6           |
| 32    | Clonidine (100 µg/kg, s.c.)  | 30.2                     | 44.5          | 42.5          | 40.7          | 31.5           |
| 35    | Clonidine (100 µg/kg, s.c.)  | 27.9                     | 43.8          | 40.4          | 30.2          | 31.1           |
| 36    | Clonidine (100 µg/kg, s.c.)  | 30.4                     | 41.8          | 49.6          | 35.1          | 26.8           |
| 37    | Clonidine (100 µg/kg, s.c.)  | 31.5                     | 42.8          | 47.5          | 43.3          | 35.6           |
| 44    | Clonidine (100 µg/kg, s.c.)  | 32.6                     | 34.6          | 37.3          | 40.9          | 26.9           |
| 45    | Clonidine (100 µg/kg, s.c.)  | 40.0                     | 49.0          | 34.7          | 39.1          | 27.4           |
| 4     | Fluocinolone (2 µg/kg, s.c.) | 41.1                     | 47.5          | 35.3          | 42.2          | 25.5           |
| 13    | Fluocinolone (2 µg/kg, s.c.) | 34.3                     | 29.3          | 29.7          | 26.1          | 31.9           |
| 15    | Fluocinolone (2 µg/kg, s.c.) | 24.4                     | 30.8          | 19.8          | 26.4          | 23.3           |
| 16    | Fluocinolone (2 µg/kg, s.c.) | 35.9                     | 43.6          | 43.9          | 34.2          | 31.7           |
| 25    | Fluocinolone (2 µg/kg, s.c.) | 38.8                     | 33.6          | 38.7          | 37.4          | 36.7           |
| 34    | Fluocinolone (2 µg/kg, s.c.) | 32.9                     | 29.9          | 30.0          | 20.9          | 16.9           |
| 39    | Fluocinolone (2 µg/kg, s.c.) | 35.0                     | 19.8          | 27.3          | 30.8          | 24.4           |
| 42    | Fluocinolone (2 µg/kg, s.c.) | 34.4                     | 30.8          | 44.1          | 43.8          | 37.8           |
| 47    | Fluocinolone (2 µg/kg, s.c.) | 32.8                     | 35.9          | 24.5          | 37.8          | 27.2           |
| 58    | Fluocinolone (2 µg/kg, s.c.) | 26.1                     | 29.9          | 26.2          | 36.7          | 30.2           |
| 1     | Morphine (6 mg/kg, s.c.)     | 38.5                     | 48.9          | 42.1          | 37.6          | 20.7           |
| 2     | Morphine (6 mg/kg, s.c.)     | 34.8                     | 47.8          | 41.7          | 36.3          | 27.0           |
| 6     | Morphine (6 mg/kg, s.c.)     | 25.5                     | 45.4          | 35.9          | 35.9          | 31.2           |
| 7     | Morphine (6 mg/kg, s.c.)     | 23.8                     | 44.5          | 39.7          | 33.7          | 31.6           |
| 8     | Morphine (6 mg/kg, s.c.)     | 35.1                     | 44.3          | 38.6          | 43.0          | 29.7           |
| 19    | Morphine (6 mg/kg, s.c.)     | 31.4                     | 43.9          | 41.8          | 30.9          | 31.5           |
| 20    | Morphine (6 mg/kg, s.c.)     | 40.6                     | 42.4          | 30.1          | 33.2          | 32.5           |
| 26    | Morphine (6 mg/kg, s.c.)     | 38.4                     | 43.1          | 45.7          | 35.0          | 28.1           |
| 48    | Morphine (6 mg/kg, s.c.)     | 30.5                     | 41.5          | 41.2          | 26.7          | 22.7           |
| 50    | Morphine (6 mg/kg, s.c.)     | 28.1                     | 26.5          | 25.5          | 30.8          | 32.3           |
| 12    | Vehicle (5 ml/kg, s.c.)      |                          |               |               |               |                |
| 22    | Vehicle (5 ml/kg, s.c.)      |                          |               |               |               |                |
| 29    | Vehicle (5 ml/kg, s.c.)      |                          |               |               |               |                |
| 38    | Vehicle (5 ml/kg, s.c.)      |                          |               |               |               |                |
| 46    | Vehicle (5 ml/kg, s.c.)      |                          |               |               |               |                |
| 52    | Vehicle (5 ml/kg, s.c.)      |                          |               |               |               |                |
| 54    | Vehicle (5 ml/kg, s.c.)      |                          |               |               |               |                |
| 55    | Vehicle (5 ml/kg, s.c.)      |                          |               |               |               |                |
| 56    | Vehicle (5 ml/kg, s.c.)      |                          |               |               |               |                |
| 3     | No Treatment                 |                          |               |               |               |                |
| 21    | No Treatment                 |                          |               |               |               |                |

**Digital Randall-Selitto Data for MIA Trial 2**

**Table 63.** Individual animal joint compression data for MIA 2 Day 7.

| Rat # | Treatment                       | Day 7 Joint Compression (g) |         |        |         |        |         |        |         |         |         |
|-------|---------------------------------|-----------------------------|---------|--------|---------|--------|---------|--------|---------|---------|---------|
|       |                                 | Baseline                    |         | 1 hour |         | 3 hour |         | 5 hour |         | 24 hour |         |
|       |                                 | lpsi.                       | Contra. | lpsi.  | Contra. | lpsi.  | Contra. | lpsi.  | Contra. | lpsi.   | Contra. |
| 9     | Vehicle (saline, 5 ml/kg, s.c.) | 103.5                       | 198.9   | 96.9   | 593.7   | 140.8  | 450.8   | 179.4  | 445.4   | 110.3   | 226.9   |
| 14    | Vehicle (saline, 5 ml/kg, s.c.) | 96.6                        | 556.1   | 143.6  | 401.9   | 139.9  | 424.6   | 86.2   | 473.8   | 70.0    | 581.8   |
| 15    | Vehicle (saline, 5 ml/kg, s.c.) | 119.1                       | 497.8   | 156.9  | 455.3   | 69.5   | 307.6   | 161.9  | 493.9   | 100.7   | 510.1   |
| 19    | Vehicle (saline, 5 ml/kg, s.c.) | 163.2                       | 338.9   | 199.2  | 260.4   | 148.2  | 534.1   | 97.7   | 508.4   | 162.2   | 253.1   |
| 31    | Vehicle (saline, 5 ml/kg, s.c.) | 111.5                       | 381.1   | 120.6  | 399.4   | 159.6  | 434.4   | 89.3   | 393.8   | 62.7    | 401.5   |
| 34    | Vehicle (saline, 5 ml/kg, s.c.) | 136.0                       | 465.4   | 119.2  | 600.0   | 137.6  | 381.0   | 133.8  | 414.9   | 103.8   | 460.0   |
| 52    | Vehicle (saline, 5 ml/kg, s.c.) | 152.1                       | 456.3   | 177.0  | 439.4   | 166.8  | 312.0   | 130.2  | 376.5   | 123.7   | 383.9   |
| 64    | Vehicle (saline, 5 ml/kg, s.c.) | 76.3                        | 246.8   | 136.1  | 255.5   | 109.3  | 306.9   | 86.1   | 201.5   | 87.6    | 283.9   |
| 76    | Vehicle (saline, 5 ml/kg, s.c.) | 90.8                        | 500.9   | 156.7  | 471.3   | 110.1  | 458.5   | 101.6  | 596.0   | 134.4   | 440.1   |
| 77    | Vehicle (saline, 5 ml/kg, s.c.) | 174.7                       | 482.9   | 168.3  | 306.4   | 158.6  | 408.4   | 152.6  | 476.8   | 129.3   | 444.9   |
| 1     | Compound A (0.3 mg/kg, i.p.)    | 109.1                       | 377.3   | 170.2  | 498.6   | 108.5  | 333.5   | 183.9  | 355.8   | 162.2   | 241.0   |
| 4     | Compound A (0.3 mg/kg, i.p.)    | 154.0                       | 373.6   | 97.8   | 267.4   | 218.4  | 335.6   | 103.2  | 262.2   | 49.1    | 489.3   |
| 7     | Compound A (0.3 mg/kg, i.p.)    | 61.6                        | 288.7   | 132.0  | 225.2   | 153.1  | 266.9   | 133.7  | 292.6   | 156.6   | 460.1   |
| 11    | Compound A (0.3 mg/kg, i.p.)    | 164.2                       | 360.9   | 108.0  | 266.6   | 133.2  | 353.6   | 107.3  | 265.7   | 106.3   | 334.0   |
| 17    | Compound A (0.3 mg/kg, i.p.)    | 128.8                       | 370.6   | 173.7  | 293.1   | 159.2  | 315.4   | 126.0  | 426.4   | 110.1   | 378.3   |
| 20    | Compound A (0.3 mg/kg, i.p.)    | 91.1                        | 374.0   | 113.1  | 469.0   | 138.8  | 424.4   | 133.4  | 456.5   | 170.0   | 282.1   |
| 23    | Compound A (0.3 mg/kg, i.p.)    | 121.1                       | 329.0   | 95.9   | 431.4   | 165.8  | 398.7   | 208.2  | 376.6   | 86.3    | 409.4   |
| 28    | Compound A (0.3 mg/kg, i.p.)    | 97.2                        | 366.0   | 126.5  | 462.2   | 104.6  | 232.2   | 131.2  | 321.4   | 171.2   | 480.4   |
| 59    | Compound A (0.3 mg/kg, i.p.)    | 177.3                       | 403.2   | 110.0  | 333.5   | 116.2  | 465.3   | 135.6  | 405.2   | 165.9   | 470.6   |
| 60    | Compound A (0.3 mg/kg, i.p.)    | 114.5                       | 419.0   | 197.9  | 417.5   | 358.7  | 409.3   | 143.2  | 233.7   | 139.7   | 339.1   |
| 6     | Compound A (0.6 mg/kg, i.p.)    | 102.2                       | 482.7   | 232.5  | 548.8   | 149.9  | 600.0   | 207.6  | 317.7   | 126.7   | 404.9   |
| 27    | Compound A (0.6 mg/kg, i.p.)    | 135.6                       | 324.5   | 163.6  | 338.1   | 168.1  | 342.0   | 86.4   | 345.4   | 98.8    | 266.5   |
| 45    | Compound A (0.6 mg/kg, i.p.)    | 172.5                       | 416.6   | 134.7  | 446.5   | 118.9  | 289.1   | 74.8   | 510.0   | 110.0   | 378.0   |
| 49    | Compound A (0.6 mg/kg, i.p.)    | 111.4                       | 264.3   | 168.1  | 383.6   | 178.0  | 355.8   | 145.0  | 398.9   | 91.0    | 418.5   |
| 51    | Compound A (0.6 mg/kg, i.p.)    | 126.6                       | 429.4   | 135.2  | 405.1   | 184.3  | 381.9   | 200.6  | 322.9   | 104.1   | 225.3   |
| 56    | Compound A (0.6 mg/kg, i.p.)    | 162.4                       | 410.5   | 143.8  | 424.1   | 170.5  | 253.6   | 182.7  | 219.0   | 92.5    | 380.1   |
| 57    | Compound A (0.6 mg/kg, i.p.)    | 143.8                       | 410.5   | 208.5  | 376.9   | 146.5  | 515.3   | 73.5   | 400.4   | 159.9   | 428.4   |
| 71    | Compound A (0.6 mg/kg, i.p.)    | 95.8                        | 397.0   | 181.0  | 211.5   | 218.7  | 293.9   | 122.9  | 362.9   | 56.9    | 342.7   |
| 73    | Compound A (0.6 mg/kg, i.p.)    | 87.2                        | 437.4   | 166.7  | 447.5   | 130.6  | 529.2   | 85.4   | 233.9   | 194.2   | 265.1   |
| 75    | Compound A (0.6 mg/kg, i.p.)    | 73.7                        | 558.1   | 131.0  | 579.6   | 181.9  | 259.9   | 182.2  | 354.8   | 139.8   | 484.2   |
| 5     | Compound B (50 mg/kg, p.o.)     | 169.4                       | 264.7   | 157.6  | 566.8   | 147.9  | 295.6   | 62.2   | 416.3   | 73.8    | 284.9   |
| 10    | Compound B (50 mg/kg, p.o.)     | 109.7                       | 312.1   | 172.2  | 453.1   | 206.6  | 419.5   | 171.2  | 255.3   | 140.4   | 210.8   |
| 21    | Compound B (50 mg/kg, p.o.)     | 177.7                       | 457.8   | 346.4  | 455.5   | 103.3  | 194.9   | 141.7  | 320.9   | 177.6   | 452.7   |
| 30    | Compound B (50 mg/kg, p.o.)     | 61.7                        | 499.2   | 110.4  | 322.1   | 181.8  | 433.7   | 129.3  | 374.4   | 127.5   | 352.4   |
| 32    | Compound B (50 mg/kg, p.o.)     | 129.3                       | 323.6   | 127.7  | 374.6   | 120.8  | 312.6   | 105.3  | 450.5   | 186.7   | 421.4   |
| 35    | Compound B (50 mg/kg, p.o.)     | 137.9                       | 402.7   | 239.6  | 380.0   | 264.8  | 446.0   | 193.8  | 382.2   | 118.9   | 427.2   |
| 37    | Compound B (50 mg/kg, p.o.)     | 123.2                       | 508.4   | 240.0  | 443.7   | 264.2  | 371.7   | 156.2  | 380.9   | 110.2   | 486.6   |
| 53    | Compound B (50 mg/kg, p.o.)     | 116.6                       | 331.8   | 58.3   | 484.0   | 252.1  | 354.1   | 173.2  | 471.7   | 121.8   | 317.1   |
| 68    | Compound B (50 mg/kg, p.o.)     | 77.7                        | 338.4   | 170.9  | 412.7   | 74.8   | 369.1   | 171.6  | 264.0   | 149.1   | 298.0   |
| 74    | Compound B (50 mg/kg, p.o.)     | 99.5                        | 309.0   | 222.9  | 223.5   | 166.9  | 415.4   | 57.4   | 290.9   | 116.2   | 361.4   |
| 2     | Compound C (0.01 mg/kg, s.c.)   | 131.1                       | 392.8   | 128.9  | 600.0   | 323.6  | 351.2   | 161.5  | 361.4   | 174.8   | 275.4   |
| 3     | Compound C (0.01 mg/kg, s.c.)   | 178.9                       | 279.9   | 89.6   | 488.3   | 109.0  | 324.4   | 107.0  | 442.1   | 91.1    | 421.2   |
| 42    | Compound C (0.01 mg/kg, s.c.)   | 110.9                       | 246.6   | 104.3  | 514.7   | 79.5   | 298.9   | 134.5  | 277.5   | 68.5    | 328.4   |
| 46    | Compound C (0.01 mg/kg, s.c.)   | 92.1                        | 516.4   | 98.9   | 446.9   | 121.4  | 463.2   | 145.1  | 470.9   | 122.5   | 341.7   |
| 48    | Compound C (0.01 mg/kg, s.c.)   | 139.1                       | 464.1   | 66.4   | 307.1   | 95.9   | 437.8   | 193.7  | 274.6   | 93.9    | 522.7   |
| 58    | Compound C (0.01 mg/kg, s.c.)   | 123.9                       | 400.1   | 83.2   | 303.7   | 151.5  | 420.8   | 130.0  | 244.0   | 181.6   | 381.9   |
| 63    | Compound C (0.01 mg/kg, s.c.)   | 63.7                        | 320.4   | 104.7  | 292.1   | 105.3  | 332.1   | 223.8  | 153.3   | 140.2   | 337.9   |
| 65    | Compound C (0.01 mg/kg, s.c.)   | 79.2                        | 215.1   | 268.3  | 443.7   | 239.2  | 303.0   | 109.2  | 422.6   | 50.1    | 373.5   |
| 66    | Compound C (0.01 mg/kg, s.c.)   | 117.4                       | 459.4   | 176.5  | 307.0   | 165.2  | 325.6   | 132.0  | 367.4   | 116.9   | 310.8   |
| 69    | Compound C (0.01 mg/kg, s.c.)   | 156.3                       | 395.2   | 293.8  | 485.9   | 55.7   | 242.2   | 154.1  | 380.5   | 74.4    | 360.8   |
| 8     | Clonidine (0.1 mg/kg, s.c.)     | 162.1                       | 346.8   | 502.7  | 473.5   | 189.4  | 398.7   | 247.7  | 492.3   | 136.4   | 321.7   |
| 22    | Clonidine (0.1 mg/kg, s.c.)     | 124.2                       | 357.7   | 350.1  | 464.1   | 496.3  | 600.0   | 281.4  | 281.6   | 114.3   | 345.6   |
| 26    | Clonidine (0.1 mg/kg, s.c.)     | 134.2                       | 233.3   | 412.5  | 443.4   | 441.4  | 361.8   | 133.4  | 393.3   | 160.1   | 305.4   |
| 33    | Clonidine (0.1 mg/kg, s.c.)     | 94.4                        | 253.3   | 370.7  | 422.6   | 407.9  | 492.2   | 167.3  | 400.2   | 71.9    | 335.8   |
| 40    | Clonidine (0.1 mg/kg, s.c.)     | 172.2                       | 206.6   | 292.9  | 522.5   | 466.7  | 451.7   | 250.5  | 404.3   | 158.2   | 386.1   |
| 41    | Clonidine (0.1 mg/kg, s.c.)     | 100.8                       | 273.6   | 335.7  | 403.7   | 411.0  | 268.8   | 221.7  | 333.7   | 106.5   | 475.2   |
| 47    | Clonidine (0.1 mg/kg, s.c.)     | 118.0                       | 417.7   | 223.2  | 530.0   | 370.8  | 477.6   | 157.5  | 317.2   | 101.5   | 397.5   |
| 50    | Clonidine (0.1 mg/kg, s.c.)     | 80.6                        | 416.2   | 410.8  | 600.0   | 246.6  | 354.3   | 217.2  | 290.9   | 175.8   | 366.6   |
| 61    | Clonidine (0.1 mg/kg, s.c.)     | 71.5                        | 365.8   | 506.9  | 567.5   | 211.2  | 399.5   | 108.0  | 489.5   | 78.2    | 404.7   |
| 62    | Clonidine (0.1 mg/kg, s.c.)     | 140.7                       | 398.9   | 489.5  | 536.5   | 365.2  | 516.4   | 108.0  | 232.1   | 156.7   | 289.2   |

**Table 64.** Individual animal joint compression data for MIA 2 Day 14.

| Rat # | Treatment                       | Day 14 Joint Compression (g) |         |        |         |        |         |        |         |         |         |
|-------|---------------------------------|------------------------------|---------|--------|---------|--------|---------|--------|---------|---------|---------|
|       |                                 | Baseline                     |         | 1 hour |         | 3 hour |         | 5 hour |         | 24 hour |         |
|       |                                 | lpsi.                        | Contra. | lpsi.  | Contra. | lpsi.  | Contra. | lpsi.  | Contra. | lpsi.   | Contra. |
| 9     | Vehicle (saline, 5 ml/kg, s.c.) | 87.3                         | 470.0   | 96.1   | 484.8   | 113.4  | 449.5   | 52.8   | 384.5   | 101.2   | 531.9   |
| 14    | Vehicle (saline, 5 ml/kg, s.c.) | 99.9                         | 536.5   | 56.8   | 492.2   | 88.9   | 441.5   | 115.5  | 503.6   | 129.1   | 333.3   |
| 15    | Vehicle (saline, 5 ml/kg, s.c.) | 107.7                        | 393.5   | 116.5  | 368.4   | 99.0   | 348.2   | 58.9   | 425.7   | 41.1    | 518.4   |
| 19    | Vehicle (saline, 5 ml/kg, s.c.) | 135.4                        | 401.3   | 71.4   | 309.2   | 68.4   | 341.2   | 77.0   | 400.1   | 32.7    | 462.6   |
| 31    | Vehicle (saline, 5 ml/kg, s.c.) | 61.0                         | 491.1   | 108.0  | 558.3   | 119.1  | 444.4   | 99.2   | 401.5   | 136.5   | 411.4   |
| 34    | Vehicle (saline, 5 ml/kg, s.c.) | 92.4                         | 402.4   | 60.8   | 443.0   | 124.9  | 412.7   | 65.8   | 444.9   | 52.5    | 532.5   |
| 52    | Vehicle (saline, 5 ml/kg, s.c.) | 93.5                         | 419.0   | 122.7  | 413.9   | 103.0  | 368.1   | 111.9  | 311.9   | 76.3    | 432.7   |
| 64    | Vehicle (saline, 5 ml/kg, s.c.) | 94.7                         | 506.7   | 86.9   | 406.7   | 107.0  | 293.9   | 81.3   | 290.3   | 56.6    | 427.0   |
| 76    | Vehicle (saline, 5 ml/kg, s.c.) | 92.7                         | 427.1   | 123.7  | 351.0   | 76.0   | 544.0   | 48.9   | 400.2   | 49.7    | 508.4   |
| 77    | Vehicle (saline, 5 ml/kg, s.c.) | 113.5                        | 589.5   | 107.6  | 438.0   | 109.8  | 505.7   | 50.1   | 295.5   | 60.3    | 363.8   |
| 1     | Compound A (0.3 mg/kg, i.p.)    | 176.6                        | 469.1   | 60.4   | 450.1   | 155.7  | 455.7   | 127.6  | 292.9   | 104.6   | 405.0   |
| 4     | Compound A (0.3 mg/kg, i.p.)    | 78.8                         | 462.9   | 90.4   | 401.1   | 76.1   | 311.8   | 54.0   | 498.0   | 103.4   | 461.9   |
| 7     | Compound A (0.3 mg/kg, i.p.)    | 67.3                         | 358.1   | 128.1  | 363.1   | 82.0   | 393.6   | 56.6   | 340.0   | 66.3    | 415.4   |
| 11    | Compound A (0.3 mg/kg, i.p.)    | 127.8                        | 595.8   | 123.3  | 389.0   | 128.6  | 428.9   | 148.2  | 387.8   | 136.5   | 501.8   |
| 17    | Compound A (0.3 mg/kg, i.p.)    | 49.3                         | 391.4   | 72.9   | 517.1   | 216.4  | 282.1   | 195.7  | 422.2   | 150.9   | 450.0   |
| 20    | Compound A (0.3 mg/kg, i.p.)    | 118.4                        | 463.3   | 122.8  | 365.8   | 79.6   | 238.5   | 137.8  | 515.5   | 57.4    | 294.0   |
| 23    | Compound A (0.3 mg/kg, i.p.)    | 110.7                        | 364.5   | 126.8  | 366.9   | 99.5   | 423.6   | 89.1   | 411.5   | 43.7    | 362.1   |
| 28    | Compound A (0.6 mg/kg, i.p.)    | 106.0                        | 342.0   | 171.4  | 480.6   | 76.7   | 403.3   | 52.2   | 342.9   | 50.2    | 430.4   |
| 59    | Compound A (0.3 mg/kg, i.p.)    | 113.3                        | 361.9   | 102.7  | 305.4   | 90.9   | 257.0   | 75.0   | 243.9   | 120.6   | 299.6   |
| 60    | Compound A (0.3 mg/kg, i.p.)    | 104.1                        | 499.9   | 71.4   | 355.6   | 114.1  | 445.4   | 81.1   | 566.3   | 92.8    | 415.7   |
| 6     | Compound A (0.6 mg/kg, i.p.)    | 115.8                        | 569.2   | 73.9   | 519.0   | 71.8   | 289.2   | 108.5  | 201.8   | 39.1    | 420.5   |
| 27    | Compound A (0.6 mg/kg, i.p.)    | 110.8                        | 319.2   | 137.7  | 543.8   | 99.4   | 435.2   | 107.2  | 432.6   | 90.7    | 467.8   |
| 45    | Compound A (0.6 mg/kg, i.p.)    | 91.3                         | 436.6   | 69.2   | 509.5   | 141.9  | 329.4   | 90.5   | 436.0   | 155.5   | 408.5   |
| 49    | Compound A (0.6 mg/kg, i.p.)    | 54.5                         | 425.1   | 65.8   | 319.2   | 42.5   | 341.9   | 99.5   | 456.1   | 152.3   | 376.6   |
| 51    | Compound A (0.6 mg/kg, i.p.)    | 92.5                         | 436.2   | 87.9   | 560.0   | 87.0   | 347.6   | 75.5   | 288.2   | 52.0    | 443.2   |
| 56    | Compound A (0.6 mg/kg, i.p.)    | 152.8                        | 529.1   | 66.8   | 435.2   | 73.1   | 319.9   | 78.1   | 355.4   | 69.2    | 248.0   |
| 57    | Compound A (0.6 mg/kg, i.p.)    | 73.6                         | 571.7   | 62.3   | 456.1   | 53.5   | 240.7   | 108.7  | 397.7   | 133.3   | 330.6   |
| 71    | Compound A (0.6 mg/kg, i.p.)    | 88.0                         | 360.8   | 99.7   | 359.1   | 87.8   | 600.0   | 49.1   | 555.6   | 120.3   | 302.1   |
| 73    | Compound A (0.6 mg/kg, i.p.)    | 103.2                        | 534.1   | 104.5  | 346.5   | 119.9  | 342.0   | 57.6   | 320.2   | 87.5    | 417.2   |
| 75    | Compound A (0.6 mg/kg, i.p.)    | 90.0                         | 465.1   | 122.5  | 500.6   | 86.9   | 419.7   | 123.9  | 362.4   | 85.7    | 471.1   |
| 5     | Compound B (50 mg/kg, p.o.)     | 48.8                         | 439.4   | 126.4  | 392.5   | 94.7   | 344.9   | 53.7   | 457.7   | 49.8    | 453.9   |
| 10    | Compound B (50 mg/kg, p.o.)     | 122.0                        | 386.6   | 73.8   | 600.0   | 158.7  | 370.5   | 120.1  | 484.1   | 108.2   | 472.1   |
| 21    | Compound B (50 mg/kg, p.o.)     | 55.4                         | 300.8   | 74.0   | 420.2   | 94.4   | 412.4   | 72.6   | 331.6   | 89.8    | 354.3   |
| 30    | Compound B (50 mg/kg, p.o.)     | 95.9                         | 383.7   | 79.9   | 382.7   | 125.2  | 353.5   | 63.2   | 256.2   | 66.6    | 444.5   |
| 32    | Compound B (50 mg/kg, p.o.)     | 97.1                         | 411.7   | 112.9  | 470.6   | 74.4   | 347.9   | 76.7   | 401.6   | 116.2   | 483.8   |
| 35    | Compound B (50 mg/kg, p.o.)     | 128.1                        | 378.6   | 228.8  | 352.9   | 164.0  | 384.0   | 129.5  | 306.0   | 103.4   | 425.8   |
| 37    | Compound B (50 mg/kg, p.o.)     | 119.4                        | 264.7   | 109.4  | 394.4   | 57.8   | 336.9   | 123.2  | 408.1   | 51.4    | 450.7   |
| 53    | Compound B (50 mg/kg, p.o.)     | 91.6                         | 411.3   | 141.2  | 303.0   | 91.0   | 310.1   | 91.5   | 292.2   | 55.8    | 477.2   |
| 68    | Compound B (50 mg/kg, p.o.)     | 91.7                         | 505.0   | 84.7   | 332.6   | 123.0  | 285.3   | 51.3   | 344.6   | 59.2    | 474.0   |
| 74    | Compound B (50 mg/kg, p.o.)     | 99.1                         | 519.3   | 103.1  | 508.5   | 67.0   | 320.9   | 60.4   | 428.8   | 67.6    | 374.1   |
| 2     | Compound C (0.01 mg/kg, s.c.)   | 70.0                         | 395.1   | 132.2  | 421.8   | 73.3   | 372.4   | 110.1  | 309.8   | 89.3    | 309.5   |
| 3     | Compound C (0.01 mg/kg, s.c.)   | 99.6                         | 378.8   | 137.1  | 349.5   | 93.0   | 327.3   | 99.4   | 222.3   | 116.7   | 348.4   |
| 42    | Compound C (0.01 mg/kg, s.c.)   | 87.0                         | 288.9   | 138.3  | 397.3   | 78.9   | 414.2   | 74.8   | 353.3   | 123.0   | 351.5   |
| 46    | Compound C (0.01 mg/kg, s.c.)   | 82.0                         | 364.5   | 78.1   | 402.5   | 143.7  | 343.5   | 107.9  | 402.1   | 71.1    | 419.6   |
| 48    | Compound C (0.01 mg/kg, s.c.)   | 134.3                        | 320.2   | 105.3  | 333.2   | 105.0  | 511.1   | 110.2  | 330.1   | 85.7    | 427.4   |
| 58    | Compound C (0.01 mg/kg, s.c.)   | 78.9                         | 296.1   | 162.1  | 393.4   | 103.8  | 383.0   | 110.4  | 262.0   | 132.8   | 381.3   |
| 63    | Compound C (0.01 mg/kg, s.c.)   | 68.9                         | 250.3   | 97.7   | 325.3   | 69.6   | 236.7   | 104.4  | 265.6   | 90.4    | 412.1   |
| 65    | Compound C (0.01 mg/kg, s.c.)   | 75.5                         | 384.6   | 102.0  | 379.0   | 107.2  | 307.6   | 62.7   | 378.9   | 119.8   | 432.8   |
| 66    | Compound C (0.01 mg/kg, s.c.)   | 98.3                         | 426.5   | 67.8   | 250.4   | 151.7  | 310.2   | 100.2  | 372.2   | 60.6    | 444.9   |
| 69    | Compound C (0.01 mg/kg, s.c.)   | 128.7                        | 351.3   | 85.9   | 260.1   | 98.9   | 350.5   | 103.9  | 261.3   | 102.4   | 360.1   |
| 8     | Clonidine (0.1 mg/kg, s.c.)     | 66.6                         | 382.2   | 270.1  | 449.0   | 409.9  | 342.5   | 104.9  | 350.2   | 45.2    | 289.5   |
| 22    | Clonidine (0.1 mg/kg, s.c.)     | 122.9                        | 407.1   | 464.7  | 473.5   | 205.1  | 375.5   | 122.5  | 415.3   | 92.0    | 268.2   |
| 26    | Clonidine (0.1 mg/kg, s.c.)     | 71.9                         | 430.8   | 219.7  | 394.8   | 130.3  | 305.6   | 114.3  | 405.0   | 52.0    | 348.5   |
| 33    | Clonidine (0.1 mg/kg, s.c.)     | 107.1                        | 600.0   | 419.7  | 388.1   | 269.6  | 410.2   | 109.4  | 451.1   | 115.3   | 344.6   |
| 40    | Clonidine (0.1 mg/kg, s.c.)     | 79.6                         | 553.9   | 357.7  | 456.3   | 261.6  | 370.7   | 130.0  | 466.3   | 134.8   | 365.5   |
| 41    | Clonidine (0.1 mg/kg, s.c.)     | 112.6                        | 372.5   | 318.0  | 385.5   | 275.4  | 273.5   | 166.3  | 415.0   | 115.3   | 527.6   |
| 47    | Clonidine (0.1 mg/kg, s.c.)     | 82.0                         | 347.8   | 179.8  | 284.9   | 85.9   | 437.3   | 44.9   | 308.0   | 40.9    | 385.3   |
| 50    | Clonidine (0.1 mg/kg, s.c.)     | 85.2                         | 487.7   | 229.0  | 439.0   | 195.9  | 359.2   | 133.3  | 294.4   | 109.1   | 470.2   |
| 61    | Clonidine (0.1 mg/kg, s.c.)     | 44.3                         | 408.1   | 296.4  | 391.9   | 250.5  | 338.4   | 114.8  | 561.3   | 63.9    | 375.3   |
| 62    | Clonidine (0.1 mg/kg, s.c.)     | 112.9                        | 600.0   | 434.8  | 352.5   | 344.6  | 300.5   | 77.7   | 483.0   | 46.8    | 276.5   |

**Table 65.** Individual animal joint compression data for MIA 2 Day 21.

| Rat # | Treatment                       | Day 21 Joint Compression (g) |         |        |         |        |         |        |         |         |         |
|-------|---------------------------------|------------------------------|---------|--------|---------|--------|---------|--------|---------|---------|---------|
|       |                                 | Baseline                     |         | 1 hour |         | 3 hour |         | 5 hour |         | 24 hour |         |
|       |                                 | lpsi.                        | Contra. | lpsi.  | Contra. | lpsi.  | Contra. | lpsi.  | Contra. | lpsi.   | Contra. |
| 9     | Vehicle (saline, 5 ml/kg, s.c.) | 165.1                        | 547.0   | 67.3   | 315.2   | 101.7  | 286.8   | 72.8   | 211.0   | 128.8   | 449.3   |
| 14    | Vehicle (saline, 5 ml/kg, s.c.) | 160.5                        | 600.0   | 364.0  | 600.0   | 111.8  | 402.2   | 155.7  | 468.6   | 289.5   | 392.1   |
| 15    | Vehicle (saline, 5 ml/kg, s.c.) | 79.2                         | 553.1   | 309.0  | 600.0   | 234.5  | 357.9   | 375.9  | 235.7   | 184.1   | 366.1   |
| 19    | Vehicle (saline, 5 ml/kg, s.c.) | 113.1                        | 569.5   | 186.2  | 600.0   | 67.5   | 520.5   | 371.2  | 422.4   | 188.6   | 392.0   |
| 31    | Vehicle (saline, 5 ml/kg, s.c.) | 230.4                        | 418.9   | 121.1  | 531.2   | 233.3  | 534.6   | 183.9  | 489.8   | 165.1   | 541.3   |
| 34    | Vehicle (saline, 5 ml/kg, s.c.) | 115.4                        | 514.9   | 292.0  | 600.0   | 227.4  | 219.6   | 154.0  | 278.6   | 229.5   | 513.1   |
| 52    | Vehicle (saline, 5 ml/kg, s.c.) | 112.3                        | 398.9   | 67.8   | 408.0   | 188.6  | 600.0   | 46.8   | 408.2   | 172.7   | 533.1   |
| 64    | Vehicle (saline, 5 ml/kg, s.c.) | 160.8                        | 533.2   | 286.8  | 305.2   | 183.5  | 296.0   | 135.9  | 223.5   | 186.2   | 424.5   |
| 76    | Vehicle (saline, 5 ml/kg, s.c.) | 242.4                        | 600.0   | 600.0  | 600.0   | 279.8  | 544.0   | 175.9  | 552.3   | 187.1   | 387.9   |
| 77    | Vehicle (saline, 5 ml/kg, s.c.) | 203.8                        | 600.0   | 380.6  | 528.0   | 223.6  | 501.1   | 177.0  | 321.9   | 161.9   | 401.4   |
| 1     | Compound A (0.3 mg/kg, i.p.)    | 118.6                        | 324.3   | 261.6  | 374.4   | 204.2  | 471.6   | 53.7   | 284.4   | 188.1   | 331.9   |
| 4     | Compound A (0.3 mg/kg, i.p.)    | 136.6                        | 519.2   | 185.5  | 600.0   | 360.4  | 502.3   | 399.1  | 412.7   | 250.7   | 334.2   |
| 7     | Compound A (0.3 mg/kg, i.p.)    | 123.5                        | 564.6   | 427.7  | 597.4   | 489.5  | 566.3   | 316.1  | 338.4   | 171.0   | 328.8   |
| 11    | Compound A (0.3 mg/kg, i.p.)    | 184.1                        | 552.3   | 327.4  | 460.2   | 72.4   | 318.5   | 351.7  | 334.3   | 62.0    | 280.3   |
| 17    | Compound A (0.3 mg/kg, i.p.)    | 254.4                        | 422.3   | 224.1  | 600.0   | 317.5  | 395.7   | 294.7  | 334.6   | 169.6   | 405.4   |
| 20    | Compound A (0.3 mg/kg, i.p.)    | 204.1                        | 587.8   | 181.5  | 551.0   | 223.0  | 324.1   | 281.0  | 312.5   | 193.8   | 430.9   |
| 23    | Compound A (0.3 mg/kg, i.p.)    | 205.0                        | 414.2   | 118.9  | 455.6   | 98.0   | 286.3   | 78.4   | 225.6   | 152.7   | 376.6   |
| 28    | Compound A (0.3 mg/kg, i.p.)    | 161.5                        | 600.0   | 74.8   | 343.9   | 211.3  | 317.1   | 136.3  | 398.1   | 149.5   | 502.1   |
| 59    | Compound A (0.3 mg/kg, i.p.)    | 126.7                        | 600.0   | 336.8  | 538.8   | 146.6  | 403.8   | 298.6  | 194.8   | 111.2   | 211.3   |
| 60    | Compound A (0.3 mg/kg, i.p.)    | 182.1                        | 491.0   | 99.9   | 600.0   | 308.1  | 441.3   | 423.0  | 479.3   | 59.3    | 596.4   |
| 6     | Compound A (0.6 mg/kg, i.p.)    | 215.1                        | 522.6   | 542.6  | 574.4   | 260.5  | 600.0   | 373.5  | 460.0   | 298.1   | 390.4   |
| 27    | Compound A (0.6 mg/kg, i.p.)    | 96.5                         | 343.7   | 144.0  | 454.1   | 197.3  | 400.5   | 213.6  | 263.1   | 240.8   | 512.0   |
| 45    | Compound A (0.6 mg/kg, i.p.)    | 125.9                        | 435.8   | 127.8  | 468.3   | 290.8  | 525.6   | 107.8  | 474.0   | 189.7   | 461.7   |
| 49    | Compound A (0.6 mg/kg, i.p.)    | 81.1                         | 581.4   | 33.2   | 342.3   | 386.8  | 371.6   | 270.8  | 321.6   | 130.7   | 338.1   |
| 51    | Compound A (0.6 mg/kg, i.p.)    | 89.3                         | 600.0   | 311.4  | 491.9   | 117.4  | 450.3   | 316.6  | 411.9   | 143.6   | 547.0   |
| 56    | Compound A (0.6 mg/kg, i.p.)    | 124.2                        | 410.6   | 198.8  | 355.9   | 239.5  | 376.0   | 147.1  | 338.7   | 216.4   | 484.2   |
| 57    | Compound A (0.6 mg/kg, i.p.)    | 98.6                         | 510.1   | 159.8  | 582.5   | 137.0  | 264.9   | 109.3  | 480.8   | 221.5   | 388.7   |
| 71    | Compound A (0.6 mg/kg, i.p.)    | 99.7                         | 600.0   | 360.7  | 472.2   | 173.1  | 416.7   | 205.1  | 486.8   | 78.3    | 348.1   |
| 73    | Compound A (0.6 mg/kg, i.p.)    | 179.1                        | 600.0   | 307.6  | 454.6   | 118.4  | 319.5   | 86.8   | 408.0   | 111.4   | 420.9   |
| 75    | Compound A (0.6 mg/kg, i.p.)    | 146.8                        | 390.4   | 334.0  | 260.3   | 184.4  | 271.4   | 141.3  | 281.9   | 113.4   | 373.6   |
| 5     | Compound B (50 mg/kg, p.o.)     | 133.7                        | 600.0   | 198.8  | 408.1   | 269.4  | 405.5   | 347.4  | 399.9   | 269.3   | 420.4   |
| 10    | Compound B (50 mg/kg, p.o.)     | 367.6                        | 600.0   | 269.4  | 478.3   | 122.8  | 558.3   | 341.1  | 448.5   | 242.6   | 472.9   |
| 21    | Compound B (50 mg/kg, p.o.)     | 272.2                        | 590.0   | 285.7  | 541.1   | 318.9  | 600.0   | 303.4  | 442.3   | 226.0   | 419.1   |
| 30    | Compound B (50 mg/kg, p.o.)     | 77.0                         | 600.0   | 311.0  | 338.8   | 437.6  | 511.0   | 221.3  | 350.8   | 183.5   | 300.0   |
| 32    | Compound B (50 mg/kg, p.o.)     | 169.4                        | 455.8   | 193.8  | 461.5   | 192.8  | 395.3   | 68.0   | 335.0   | 190.3   | 434.6   |
| 35    | Compound B (50 mg/kg, p.o.)     | 170.4                        | 502.6   | 196.0  | 480.5   | 169.2  | 332.2   | 135.4  | 461.2   | 209.1   | 345.9   |
| 37    | Compound B (50 mg/kg, p.o.)     | 113.0                        | 411.3   | 217.1  | 600.0   | 149.4  | 436.0   | 146.7  | 281.0   | 188.7   | 458.5   |
| 53    | Compound B (50 mg/kg, p.o.)     | 218.0                        | 506.8   | 263.0  | 344.6   | 432.6  | 515.0   | 368.3  | 511.0   | 79.5    | 387.0   |
| 68    | Compound B (50 mg/kg, p.o.)     | 301.7                        | 559.6   | 359.5  | 421.6   | 187.1  | 390.2   | 234.2  | 600.0   | 211.2   | 382.9   |
| 74    | Compound B (50 mg/kg, p.o.)     | 183.8                        | 322.6   | 336.8  | 480.9   | 208.7  | 302.7   | 300.6  | 374.0   | 128.9   | 455.3   |
| 2     | Compound C (0.01 mg/kg, s.c.)   | 91.4                         | 289.6   | 266.0  | 600.0   | 142.0  | 516.3   | 111.5  | 275.3   | 98.8    | 258.6   |
| 3     | Compound C (0.01 mg/kg, s.c.)   | 114.1                        | 433.8   | 113.6  | 600.0   | 153.9  | 399.1   | 161.9  | 262.8   | 119.7   | 257.2   |
| 42    | Compound C (0.01 mg/kg, s.c.)   | 110.0                        | 422.4   | 477.5  | 600.0   | 192.1  | 323.1   | 112.6  | 271.9   | 188.1   | 413.1   |
| 46    | Compound C (0.01 mg/kg, s.c.)   | 188.7                        | 440.6   | 291.8  | 532.6   | 211.0  | 600.0   | 227.4  | 240.7   | 238.8   | 356.0   |
| 48    | Compound C (0.01 mg/kg, s.c.)   | 135.3                        | 600.0   | 228.9  | 424.5   | 145.1  | 414.4   | 161.8  | 365.3   | 167.3   | 306.1   |
| 58    | Compound C (0.01 mg/kg, s.c.)   | 162.0                        | 300.6   | 266.9  | 592.4   | 211.2  | 600.0   | 155.7  | 222.9   | 211.6   | 353.0   |
| 63    | Compound C (0.01 mg/kg, s.c.)   | 137.0                        | 276.3   | 178.5  | 166.9   | 96.5   | 228.3   | 198.6  | 215.8   | 124.1   | 379.4   |
| 65    | Compound C (0.01 mg/kg, s.c.)   | 174.8                        | 600.0   | 237.1  | 562.0   | 95.9   | 277.4   | 188.4  | 378.9   | 192.0   | 247.0   |
| 66    | Compound C (0.01 mg/kg, s.c.)   | 55.4                         | 299.4   | 123.7  | 362.7   | 86.2   | 242.9   | 139.9  | 353.1   | 160.5   | 238.1   |
| 69    | Compound C (0.01 mg/kg, s.c.)   | 127.0                        | 351.6   | 223.8  | 249.5   | 99.3   | 178.2   | 76.4   | 256.1   | 172.7   | 421.5   |
| 8     | Clonidine (0.1 mg/kg, s.c.)     | 198.7                        | 600.0   | 457.9  | 495.5   | 389.9  | 505.2   | 182.7  | 357.0   | 151.1   | 503.0   |
| 22    | Clonidine (0.1 mg/kg, s.c.)     | 228.1                        | 435.5   | 508.5  | 600.0   | 567.0  | 600.0   | 321.5  | 600.0   | 161.7   | 375.9   |
| 26    | Clonidine (0.1 mg/kg, s.c.)     | 201.0                        | 600.0   | 537.1  | 468.2   | 600.0  | 600.0   | 374.7  | 568.6   | 153.6   | 519.8   |
| 33    | Clonidine (0.1 mg/kg, s.c.)     | 189.1                        | 509.7   | 531.0  | 481.7   | 600.0  | 600.0   | 416.4  | 596.4   | 149.9   | 485.9   |
| 40    | Clonidine (0.1 mg/kg, s.c.)     | 183.5                        | 433.3   | 78.8   | 378.4   | 339.8  | 583.1   | 452.1  | 600.0   | 272.2   | 460.4   |
| 41    | Clonidine (0.1 mg/kg, s.c.)     | 210.7                        | 594.5   | 259.9  | 252.0   | 116.2  | 448.3   | 87.1   | 333.6   | 104.0   | 253.3   |
| 47    | Clonidine (0.1 mg/kg, s.c.)     | 176.7                        | 404.7   | 600.0  | 600.0   | 187.5  | 267.7   | 91.9   | 266.3   | 127.4   | 498.4   |
| 50    | Clonidine (0.1 mg/kg, s.c.)     | 187.9                        | 408.4   | 183.2  | 421.2   | 255.9  | 327.1   | 107.6  | 424.8   | 86.4    | 371.0   |
| 61    | Clonidine (0.1 mg/kg, s.c.)     | 189.1                        | 600.0   | 470.7  | 600.0   | 461.2  | 600.0   | 305.5  | 409.6   | 189.7   | 539.6   |
| 62    | Clonidine (0.1 mg/kg, s.c.)     | 136.9                        | 527.1   | 360.9  | 520.2   | 83.5   | 463.8   | 269.2  | 208.5   | 116.0   | 381.1   |

**Table 66.** Individual animal joint compression data for MIA 2 Day 28.

| Rat # | Treatment                       | Day 28 Joint Compression (g) |         |        |         |        |         |        |         |         |         |
|-------|---------------------------------|------------------------------|---------|--------|---------|--------|---------|--------|---------|---------|---------|
|       |                                 | Baseline                     |         | 1 hour |         | 3 hour |         | 5 hour |         | 24 hour |         |
|       |                                 | lpsi.                        | Contra. | lpsi.  | Contra. | lpsi.  | Contra. | lpsi.  | Contra. | lpsi.   | Contra. |
| 9     | Vehicle (saline, 5 ml/kg, s.c.) | 110.4                        | 250.9   | 100.8  | 480.3   | 74.8   | 477.9   | 74.8   | 589.5   | 79.1    | 450.6   |
| 14    | Vehicle (saline, 5 ml/kg, s.c.) | 119.9                        | 479.5   | 164.1  | 600.0   | 106.7  | 473.1   | 167.6  | 507.8   | 143.7   | 469.5   |
| 15    | Vehicle (saline, 5 ml/kg, s.c.) | 176.0                        | 522.3   | 122.0  | 448.3   | 162.7  | 499.1   | 92.7   | 333.2   | 156.6   | 600.0   |
| 19    | Vehicle (saline, 5 ml/kg, s.c.) | 166.6                        | 432.7   | 99.2   | 481.0   | 99.9   | 437.3   | 111.0  | 523.8   | 106.3   | 600.0   |
| 31    | Vehicle (saline, 5 ml/kg, s.c.) | 134.3                        | 561.4   | 122.4  | 332.3   | 104.6  | 570.1   | 141.5  | 459.1   | 174.9   | 568.3   |
| 34    | Vehicle (saline, 5 ml/kg, s.c.) | 132.5                        | 388.7   | 142.0  | 557.7   | 159.2  | 408.9   | 112.2  | 600.0   | 107.9   | 343.6   |
| 52    | Vehicle (saline, 5 ml/kg, s.c.) | 111.6                        | 600.0   | 108.0  | 600.0   | 120.5  | 329.6   | 149.7  | 449.3   | 119.5   | 556.8   |
| 64    | Vehicle (saline, 5 ml/kg, s.c.) | 132.5                        | 377.7   | 123.6  | 505.2   | 121.1  | 499.0   | 133.1  | 368.6   | 88.8    | 358.0   |
| 76    | Vehicle (saline, 5 ml/kg, s.c.) | 168.5                        | 521.3   | 140.7  | 593.9   | 155.9  | 393.5   | 134.9  | 600.0   | 154.4   | 384.1   |
| 77    | Vehicle (saline, 5 ml/kg, s.c.) | 104.6                        | 452.0   | 136.3  | 600.0   | 79.5   | 521.6   | 139.9  | 352.9   | 75.1    | 600.0   |
| 1     | Compound A (0.3 mg/kg, i.p.)    | 116.7                        | 507.3   | 117.0  | 482.7   | 109.4  | 436.2   | 162.2  | 461.1   | 127.2   | 386.7   |
| 4     | Compound A (0.3 mg/kg, i.p.)    | 194.6                        | 416.3   | 119.5  | 505.4   | 122.5  | 430.8   | 127.0  | 395.8   | 84.0    | 398.8   |
| 7     | Compound A (0.3 mg/kg, i.p.)    | 165.2                        | 307.5   | 123.0  | 408.6   | 189.3  | 518.5   | 73.8   | 347.1   | 123.2   | 432.2   |
| 11    | Compound A (0.3 mg/kg, i.p.)    | 148.6                        | 547.6   | 77.7   | 517.6   | 126.9  | 458.8   | 125.2  | 411.7   | 141.7   | 447.4   |
| 17    | Compound A (0.3 mg/kg, i.p.)    | 110.4                        | 265.7   | 175.5  | 381.2   | 114.8  | 176.6   | 179.2  | 535.3   | 158.1   | 531.9   |
| 20    | Compound A (0.3 mg/kg, i.p.)    | 150.1                        | 600.0   | 135.0  | 524.4   | 136.3  | 356.8   | 136.6  | 411.2   | 89.4    | 418.0   |
| 23    | Compound A (0.3 mg/kg, i.p.)    | 89.4                         | 463.6   | 136.6  | 438.0   | 123.1  | 548.7   | 154.0  | 311.0   | 91.9    | 456.8   |
| 28    | Compound A (0.3 mg/kg, i.p.)    | 108.3                        | 529.2   | 167.8  | 465.9   | 136.6  | 307.7   | 69.0   | 319.8   | 130.0   | 499.9   |
| 59    | Compound A (0.3 mg/kg, i.p.)    | 104.2                        | 521.8   | 241.2  | 490.8   | 126.4  | 218.9   | 120.5  | 457.1   | 120.1   | 448.6   |
| 60    | Compound A (0.3 mg/kg, i.p.)    | 148.2                        | 502.8   | 128.9  | 520.1   | 114.4  | 519.1   | 126.2  | 372.5   | 118.6   | 301.6   |
| 6     | Compound A (0.6 mg/kg, i.p.)    | 164.8                        | 348.5   | 188.6  | 600.0   | 176.5  | 594.6   | 97.6   | 573.8   | 168.9   | 555.9   |
| 27    | Compound A (0.6 mg/kg, i.p.)    | 96.4                         | 287.5   | 150.4  | 533.1   | 130.8  | 529.5   | 116.7  | 392.5   | 90.9    | 473.9   |
| 45    | Compound A (0.6 mg/kg, i.p.)    | 135.6                        | 544.4   | 197.6  | 466.2   | 230.1  | 535.1   | 179.5  | 452.9   | 102.3   | 484.0   |
| 49    | Compound A (0.6 mg/kg, i.p.)    | 165.6                        | 355.3   | 88.2   | 498.2   | 122.0  | 442.5   | 133.3  | 540.0   | 132.1   | 507.4   |
| 51    | Compound A (0.6 mg/kg, i.p.)    | 96.9                         | 501.9   | 216.4  | 419.5   | 117.3  | 517.2   | 181.8  | 491.4   | 117.9   | 418.0   |
| 56    | Compound A (0.6 mg/kg, i.p.)    | 126.3                        | 600.0   | 93.3   | 558.9   | 144.0  | 422.3   | 121.6  | 562.0   | 105.3   | 466.0   |
| 57    | Compound A (0.6 mg/kg, i.p.)    | 133.9                        | 386.6   | 166.6  | 560.8   | 141.9  | 373.0   | 186.7  | 387.7   | 135.1   | 336.8   |
| 71    | Compound A (0.6 mg/kg, i.p.)    | 92.5                         | 480.6   | 117.2  | 269.8   | 141.2  | 399.4   | 148.0  | 248.9   | 131.0   | 509.8   |
| 73    | Compound A (0.6 mg/kg, i.p.)    | 100.7                        | 524.4   | 81.3   | 386.3   | 179.2  | 363.0   | 125.9  | 329.2   | 102.9   | 600.0   |
| 75    | Compound A (0.6 mg/kg, i.p.)    | 108.8                        | 529.2   | 173.7  | 366.8   | 122.8  | 351.5   | 138.5  | 439.9   | 98.8    | 571.4   |
| 5     | Compound B (50 mg/kg, p.o.)     | 124.3                        | 580.5   | 112.1  | 519.7   | 159.5  | 554.4   | 148.2  | 568.2   | 136.7   | 573.9   |
| 10    | Compound B (50 mg/kg, p.o.)     | 159.3                        | 414.2   | 88.4   | 444.9   | 227.8  | 469.4   | 154.4  | 513.9   | 163.9   | 504.7   |
| 21    | Compound B (50 mg/kg, p.o.)     | 130.0                        | 554.9   | 120.3  | 576.0   | 92.9   | 479.6   | 166.9  | 495.1   | 151.4   | 600.0   |
| 30    | Compound B (50 mg/kg, p.o.)     | 142.7                        | 355.3   | 108.6  | 552.2   | 104.2  | 367.4   | 57.3   | 535.3   | 138.8   | 374.3   |
| 32    | Compound B (50 mg/kg, p.o.)     | 100.0                        | 334.3   | 108.0  | 540.7   | 124.1  | 452.0   | 91.2   | 269.3   | 126.2   | 473.2   |
| 35    | Compound B (50 mg/kg, p.o.)     | 115.5                        | 600.0   | 128.5  | 435.8   | 129.1  | 389.8   | 131.6  | 417.8   | 117.9   | 448.4   |
| 37    | Compound B (50 mg/kg, p.o.)     | 92.8                         | 475.5   | 171.3  | 428.3   | 177.5  | 308.7   | 102.7  | 332.3   | 132.7   | 499.5   |
| 53    | Compound B (50 mg/kg, p.o.)     | 148.9                        | 532.9   | 157.9  | 279.0   | 171.8  | 505.5   | 62.7   | 262.2   | 114.0   | 600.0   |
| 68    | Compound B (50 mg/kg, p.o.)     | 132.5                        | 581.3   | 199.9  | 495.1   | 132.7  | 469.3   | 149.2  | 270.8   | 140.9   | 471.5   |
| 74    | Compound B (50 mg/kg, p.o.)     | 102.4                        | 600.0   | 133.7  | 352.9   | 107.2  | 343.5   | 96.6   | 289.8   | 111.6   | 539.5   |
| 2     | Compound C (0.01 mg/kg, s.c.)   | 111.0                        | 411.3   | 149.4  | 324.1   | 130.7  | 285.3   | 132.6  | 350.2   | 124.9   | 495.0   |
| 3     | Compound C (0.01 mg/kg, s.c.)   | 122.4                        | 442.6   | 167.2  | 387.3   | 89.3   | 456.8   | 103.5  | 351.1   | 99.9    | 169.3   |
| 42    | Compound C (0.01 mg/kg, s.c.)   | 84.7                         | 600.0   | 155.0  | 336.3   | 146.3  | 418.4   | 105.6  | 427.7   | 117.1   | 493.4   |
| 46    | Compound C (0.01 mg/kg, s.c.)   | 95.6                         | 239.3   | 128.6  | 447.2   | 117.7  | 288.3   | 158.7  | 312.2   | 168.2   | 414.6   |
| 48    | Compound C (0.01 mg/kg, s.c.)   | 146.4                        | 527.3   | 175.8  | 413.2   | 149.9  | 427.1   | 157.8  | 330.6   | 136.0   | 434.7   |
| 58    | Compound C (0.01 mg/kg, s.c.)   | 121.9                        | 436.3   | 160.8  | 377.3   | 177.7  | 321.8   | 59.2   | 180.7   | 105.0   | 331.1   |
| 63    | Compound C (0.01 mg/kg, s.c.)   | 91.2                         | 312.2   | 105.3  | 215.4   | 117.7  | 252.4   | 104.4  | 394.5   | 136.8   | 299.6   |
| 65    | Compound C (0.01 mg/kg, s.c.)   | 127.1                        | 289.3   | 121.0  | 392.4   | 151.8  | 398.3   | 83.5   | 378.7   | 96.7    | 448.6   |
| 66    | Compound C (0.01 mg/kg, s.c.)   | 93.0                         | 426.5   | 114.3  | 388.0   | 111.1  | 361.4   | 171.8  | 490.7   | 113.9   | 456.8   |
| 69    | Compound C (0.01 mg/kg, s.c.)   | 143.1                        | 438.0   | 127.0  | 429.1   | 149.4  | 317.0   | 151.6  | 238.6   | 80.1    | 511.3   |
| 8     | Clonidine (0.1 mg/kg, s.c.)     | 82.8                         | 600.0   | 296.0  | 361.1   | 197.1  | 576.0   | 116.6  | 341.5   | 135.3   | 312.4   |
| 22    | Clonidine (0.1 mg/kg, s.c.)     | 136.4                        | 462.7   | 485.6  | 600.0   | 559.0  | 489.0   | 362.4  | 588.1   | 145.8   | 415.5   |
| 26    | Clonidine (0.1 mg/kg, s.c.)     | 74.3                         | 555.6   | 243.2  | 600.0   | 425.5  | 588.5   | 215.3  | 488.8   | 119.2   | 478.2   |
| 33    | Clonidine (0.1 mg/kg, s.c.)     | 110.4                        | 565.5   | 407.8  | 600.0   | 268.5  | 544.7   | 165.0  | 170.7   | 124.0   | 429.4   |
| 40    | Clonidine (0.1 mg/kg, s.c.)     | 150.7                        | 600.0   | 493.1  | 600.0   | 225.8  | 600.0   | 323.6  | 407.3   | 129.5   | 459.7   |
| 41    | Clonidine (0.1 mg/kg, s.c.)     | 125.8                        | 563.0   | 512.1  | 550.3   | 449.8  | 523.4   | 445.7  | 542.5   | 77.2    | 380.5   |
| 47    | Clonidine (0.1 mg/kg, s.c.)     | 75.3                         | 446.3   | 185.2  | 457.0   | 265.3  | 541.8   | 318.7  | 398.8   | 140.9   | 391.1   |
| 50    | Clonidine (0.1 mg/kg, s.c.)     | 86.7                         | 430.0   | 390.0  | 535.4   | 277.5  | 393.2   | 239.2  | 393.8   | 111.6   | 516.1   |
| 61    | Clonidine (0.1 mg/kg, s.c.)     | 84.8                         | 600.0   | 228.0  | 465.3   | 140.3  | 482.9   | 208.3  | 585.2   | 128.0   | 535.9   |
| 62    | Clonidine (0.1 mg/kg, s.c.)     | 102.9                        | 595.3   | 249.2  | 385.6   | 243.8  | 533.1   | 156.2  | 373.7   | 92.8    | 534.6   |

# Digital Randall-Selitto Data for MIA Trial 3

**Table 67.** Individual joint compression data for MIA Trial 3 Day 7.

| Joint Compression (g) |                               | Day 7 Joint Compression (g) |         |        |         |        |         |        |         |         |         |
|-----------------------|-------------------------------|-----------------------------|---------|--------|---------|--------|---------|--------|---------|---------|---------|
| Rat #                 | Treatment                     | Baseline                    |         | 1 hour |         | 3 hour |         | 5 hour |         | 24 hour |         |
|                       |                               | lpsi.                       | Contra. | lpsi.  | Contra. | lpsi.  | Contra. | lpsi.  | Contra. | lpsi.   | Contra. |
| 3                     | Vehicle (saline, 30 µl, i.a.) | 91.4                        | 482.7   | 119.9  | 412.4   | 81.3   | 486.9   | 97.3   | 443.8   | 101.9   | 433.6   |
| 15                    | Vehicle (saline, 30 µl, i.a.) | 66.5                        | 414.6   | 97.8   | 500.0   | 92.7   | 342.5   | 92.6   | 500.0   | 99.7    | 373.0   |
| 27                    | Vehicle (saline, 30 µl, i.a.) | 116.4                       | 375.3   | 82.8   | 433.1   | 117.9  | 395.2   | 89.8   | 391.5   | 103.9   | 460.4   |
| 32                    | Vehicle (saline, 30 µl, i.a.) | 112.1                       | 500.0   | 90.6   | 393.3   | 97.0   | 459.1   | 288.5  | 459.9   | 86.4    | 380.0   |
| 34                    | Vehicle (saline, 30 µl, i.a.) | 109.8                       | 366.0   | 88.4   | 352.4   | 83.6   | 456.6   | 83.3   | 305.9   | 97.5    | 379.4   |
| 56                    | Vehicle (saline, 30 µl, i.a.) | 100.5                       | 399.1   | 111.4  | 316.3   | 111.0  | 477.7   | 86.1   | 404.2   | 101.2   | 348.0   |
| 72                    | Vehicle (saline, 30 µl, i.a.) | 118.6                       | 402.8   | 82.4   | 411.4   | 101.4  | 310.0   | 107.3  | 335.2   | 113.0   | 424.7   |
| 78                    | Vehicle (saline, 30 µl, i.a.) | 97.5                        | 372.3   | 94.4   | 426.2   | 112.1  | 374.1   | 90.4   | 334.6   | 72.4    | 431.9   |
| 85                    | Vehicle (saline, 30 µl, i.a.) | 123.2                       | 337.1   | 88.2   | 433.2   | 70.3   | 343.9   | 78.3   | 404.1   | 114.5   | 452.9   |
| 88                    | Vehicle (saline, 30 µl, i.a.) | 106.3                       | 333.9   | 77.7   | 344.8   | 63.7   | 472.6   | 87.4   | 377.9   | 92.0    | 430.3   |
| 8                     | Compound A (4.5 µg, i.a.)     | 98.5                        | 422.7   | 114.9  | 317.0   | 75.8   | 443.1   | 129.8  | 394.3   | 111.1   | 438.5   |
| 10                    | Compound A (4.5 µg, i.a.)     | 106.9                       | 451.2   | 110.8  | 407.2   | 73.8   | 409.8   | 90.8   | 319.6   | 117.6   | 396.7   |
| 20                    | Compound A (4.5 µg, i.a.)     | 82.2                        | 484.4   | 91.9   | 500.0   | 113.7  | 399.4   | 121.2  | 393.6   | 101.9   | 436.4   |
| 26                    | Compound A (4.5 µg, i.a.)     | 112.2                       | 452.6   | 161.5  | 330.7   | 126.9  | 419.5   | 104.9  | 317.6   | 94.3    | 500.0   |
| 33                    | Compound A (4.5 µg, i.a.)     | 116.5                       | 464.9   | 111.5  | 423.3   | 82.3   | 407.4   | 111.4  | 324.1   | 95.1    | 500.0   |
| 36                    | Compound A (4.5 µg, i.a.)     | 101.0                       | 344.1   | 99.6   | 375.5   | 75.0   | 340.9   | 84.2   | 453.6   | 107.2   | 387.5   |
| 40                    | Compound A (4.5 µg, i.a.)     | 119.1                       | 435.6   | 138.7  | 420.9   | 131.5  | 451.7   | 99.6   | 353.4   | 136.8   | 500.0   |
| 57                    | Compound A (4.5 µg, i.a.)     | 72.2                        | 468.8   | 153.1  | 420.9   | 139.9  | 357.5   | 99.4   | 490.6   | 100.9   | 488.3   |
| 66                    | Compound A (4.5 µg, i.a.)     | 109.9                       | 364.9   | 117.6  | 297.6   | 135.2  | 437.3   | 111.6  | 489.7   | 113.8   | 500.0   |
| 74                    | Compound A (4.5 µg, i.a.)     | 121.5                       | 407.6   | 121.6  | 428.9   | 106.6  | 446.3   | 138.7  | 230.6   | 89.3    | 498.7   |
| 13                    | Compound B (30 ng, i.a.)      | 73.3                        | 479.1   | 107.7  | 414.6   | 125.5  | 354.6   | 128.5  | 369.1   | 84.0    | 421.4   |
| 17                    | Compound B (30 ng, i.a.)      | 113.0                       | 401.1   | 81.8   | 386.5   | 84.5   | 422.9   | 109.2  | 352.4   | 107.4   | 375.6   |
| 23                    | Compound B (30 ng, i.a.)      | 91.5                        | 404.5   | 97.1   | 298.4   | 78.2   | 445.3   | 104.8  | 328.5   | 89.2    | 351.2   |
| 24                    | Compound B (30 ng, i.a.)      | 101.3                       | 476.7   | 128.1  | 340.1   | 101.4  | 365.2   | 122.0  | 369.2   | 99.1    | 485.3   |
| 41                    | Compound B (30 ng, i.a.)      | 116.9                       | 500.0   | 111.2  | 230.2   | 147.8  | 371.0   | 114.5  | 380.6   | 95.4    | 458.9   |
| 43                    | Compound B (30 ng, i.a.)      | 119.4                       | 417.8   | 85.6   | 370.4   | 74.9   | 334.6   | 90.8   | 430.8   | 109.7   | 356.3   |
| 50                    | Compound B (30 ng, i.a.)      | 83.6                        | 360.2   | 94.1   | 445.7   | 108.0  | 273.0   | 107.7  | 207.1   | 106.0   | 319.5   |
| 77                    | Compound B (30 ng, i.a.)      | 107.3                       | 350.7   | 71.4   | 426.9   | 68.0   | 422.6   | 110.2  | 347.4   | 86.2    | 404.5   |
| 82                    | Compound B (30 ng, i.a.)      | 122.0                       | 417.8   | 113.0  | 406.7   | 113.7  | 468.7   | 107.7  | 462.6   | 114.6   | 470.1   |
| 90                    | Compound B (30 ng, i.a.)      | 110.2                       | 380.6   | 102.6  | 285.9   | 135.8  | 420.1   | 113.8  | 342.9   | 113.0   | 459.7   |
| 25                    | Compound C (15 ng, i.a.)      | 93.7                        | 481.2   | 103.6  | 500.0   | 82.9   | 500.0   | 109.4  | 366.8   | 104.2   | 500.0   |
| 28                    | Compound C (15 ng, i.a.)      | 110.3                       | 367.7   | 85.7   | 249.2   | 77.0   | 351.5   | 82.2   | 397.1   | 105.3   | 473.7   |
| 39                    | Compound C (15 ng, i.a.)      | 76.3                        | 446.2   | 194.2  | 409.8   | 182.1  | 500.0   | 137.1  | 417.1   | 100.1   | 500.0   |
| 49                    | Compound C (15 ng, i.a.)      | 85.0                        | 372.3   | 116.7  | 383.2   | 116.5  | 456.8   | 111.2  | 294.3   | 97.6    | 443.1   |
| 58                    | Compound C (15 ng, i.a.)      | 98.5                        | 288.7   | 125.5  | 348.5   | 190.9  | 358.7   | 117.9  | 425.8   | 111.1   | 500.0   |
| 70                    | Compound C (15 ng, i.a.)      | 107.9                       | 433.5   | 137.4  | 330.8   | 116.6  | 500.0   | 113.5  | 375.7   | 127.8   | 463.8   |
| 87                    | Compound C (15 ng, i.a.)      | 117.6                       | 361.1   | 95.1   | 500.0   | 89.7   | 500.0   | 93.6   | 457.8   | 105.7   | 419.0   |
| 91                    | Compound C (15 ng, i.a.)      | 119.7                       | 361.6   | 125.9  | 500.0   | 83.8   | 451.6   | 110.2  | 439.6   | 99.4    | 437.3   |
| 95                    | Compound C (15 ng, i.a.)      | 122.0                       | 445.1   | 106.0  | 321.4   | 121.3  | 500.0   | 76.2   | 413.1   | 121.9   | 381.3   |
| 98                    | Compound C (15 ng, i.a.)      | 113.3                       | 325.7   | 89.2   | 420.6   | 103.3  | 432.2   | 102.2  | 460.9   | 74.2    | 460.2   |
| 21                    | Compound D (0.1 mg, i.a.)     | 77.5                        | 415.1   | 121.4  | 219.0   | 108.5  | 500.0   | 91.7   | 246.8   | 77.8    | 422.3   |
| 30                    | Compound D (0.1 mg, i.a.)     | 122.3                       | 413.9   | 132.9  | 373.0   | 169.3  | 284.7   | 84.9   | 500.0   | 95.7    | 454.4   |
| 42                    | Compound D (0.1 mg, i.a.)     | 101.6                       | 444.7   | 107.0  | 445.9   | 89.6   | 426.8   | 101.9  | 321.6   | 125.7   | 343.4   |
| 53                    | Compound D (0.1 mg, i.a.)     | 98.6                        | 497.1   | 109.7  | 434.9   | 106.7  | 355.3   | 104.6  | 304.9   | 129.9   | 319.7   |
| 71                    | Compound D (0.1 mg, i.a.)     | 110.3                       | 410.4   | 112.6  | 322.2   | 110.8  | 379.0   | 102.8  | 388.5   | 100.0   | 378.8   |
| 75                    | Compound D (0.1 mg, i.a.)     | 88.4                        | 443.9   | 109.8  | 361.1   | 89.1   | 363.5   | 80.1   | 413.8   | 105.6   | 474.5   |
| 76                    | Compound D (0.1 mg, i.a.)     | 119.9                       | 462.0   | 98.5   | 409.4   | 93.9   | 333.8   | 115.5  | 286.7   | 115.3   | 500.0   |
| 86                    | Compound D (0.1 mg, i.a.)     | 114.0                       | 436.9   | 94.7   | 410.7   | 132.3  | 454.9   | 110.8  | 372.5   | 115.5   | 415.9   |
| 97                    | Compound D (0.1 mg, i.a.)     | 117.8                       | 407.4   | 116.8  | 205.4   | 75.6   | 363.5   | 102.7  | 459.5   | 99.8    | 500.0   |
| 99                    | Compound D (0.1 mg, i.a.)     | 94.1                        | 420.2   | 104.1  | 410.4   | 111.5  | 436.8   | 90.9   | 313.5   | 80.9    | 405.9   |
| 7                     | Compound E (500 ng, i.a.)     | 94.7                        | 393.6   | 93.4   | 449.8   | 85.9   | 356.5   | 115.5  | 356.6   | 95.3    | 425.6   |
| 11                    | Compound E (500 ng, i.a.)     | 102.3                       | 452.8   | 123.8  | 256.4   | 120.6  | 377.1   | 129.8  | 440.9   | 77.0    | 361.7   |
| 22                    | Compound E (500 ng, i.a.)     | 78.7                        | 294.1   | 97.1   | 431.9   | 106.8  | 328.2   | 116.4  | 416.9   | 116.6   | 479.0   |
| 44                    | Compound E (500 ng, i.a.)     | 89.8                        | 415.1   | 97.3   | 428.6   | 97.3   | 386.1   | 93.1   | 312.5   | 105.8   | 377.6   |
| 46                    | Compound E (500 ng, i.a.)     | 115.2                       | 428.7   | 102.0  | 466.5   | 123.7  | 461.2   | 110.0  | 283.7   | 93.1    | 305.0   |
| 52                    | Compound E (500 ng, i.a.)     | 99.1                        | 500.0   | 103.4  | 310.7   | 91.2   | 337.4   | 99.8   | 273.1   | 111.3   | 469.0   |
| 63                    | Compound E (500 ng, i.a.)     | 108.0                       | 318.6   | 120.8  | 360.4   | 147.2  | 378.1   | 116.5  | 328.0   | 107.0   | 461.1   |
| 68                    | Compound E (500 ng, i.a.)     | 122.3                       | 469.9   | 171.5  | 386.8   | 109.0  | 399.4   | 99.9   | 362.8   | 87.8    | 500.0   |
| 89                    | Compound E (500 ng, i.a.)     | 120.0                       | 318.1   | 142.7  | 476.1   | 120.8  | 303.8   | 102.5  | 313.7   | 92.5    | 339.1   |
| 96                    | Compound E (500 ng, i.a.)     | 118.2                       | 500.0   | 100.5  | 447.8   | 127.9  | 500.0   | 72.8   | 414.4   | 80.3    | 500.0   |
| 14                    | Compound F (0.15 mg, i.a.)    | 108.1                       | 487.7   | 112.1  | 343.8   | 96.2   | 302.8   | 134.2  | 405.5   | 86.9    | 464.9   |
| 29                    | Compound F (0.15 mg, i.a.)    | 96.4                        | 422.1   | 69.7   | 327.4   | 97.8   | 333.7   | 88.4   | 371.2   | 94.1    | 379.3   |
| 45                    | Compound F (0.15 mg, i.a.)    | 120.3                       | 433.2   | 84.7   | 331.3   | 129.1  | 352.9   | 74.3   | 332.3   | 113.5   | 474.7   |
| 48                    | Compound F (0.15 mg, i.a.)    | 104.2                       | 475.3   | 120.1  | 418.0   | 103.4  | 353.1   | 103.5  | 329.4   | 81.3    | 399.6   |
| 51                    | Compound F (0.15 mg, i.a.)    | 122.8                       | 455.1   | 104.9  | 446.5   | 139.4  | 382.0   | 123.4  | 286.3   | 99.0    | 426.3   |
| 54                    | Compound F (0.15 mg, i.a.)    | 80.6                        | 445.4   | 114.8  | 443.7   | 132.4  | 464.8   | 97.6   | 500.0   | 101.6   | 319.7   |
| 59                    | Compound F (0.15 mg, i.a.)    | 121.5                       | 413.7   | 107.8  | 381.5   | 108.0  | 500.0   | 98.5   | 363.6   | 94.5    | 302.5   |
| 73                    | Compound F (0.15 mg, i.a.)    | 89.9                        | 432.2   | 107.0  | 500.0   | 103.4  | 308.8   | 95.1   | 388.9   | 99.6    | 363.0   |
| 80                    | Compound F (0.15 mg, i.a.)    | 99.3                        | 367.9   | 80.0   | 375.2   | 104.8  | 270.8   | 105.2  | 498.1   | 77.0    | 367.2   |
| 94                    | Compound F (0.15 mg, i.a.)    | 111.0                       | 388.3   | 84.7   | 334.3   | 106.3  | 296.6   | 92.5   | 406.6   | 98.2    | 393.5   |
| 1                     | Clonidine (0.1 mg/kg, s.c.)   | 122.9                       | 496.9   | 142.0  | 500.0   | 183.8  | 411.8   | 177.7  | 373.1   | 90.8    | 463.7   |
| 12                    | Clonidine (0.1 mg/kg, s.c.)   | 116.1                       | 500.0   | 274.8  | 500.0   | 257.3  | 500.0   | 209.3  | 287.4   | 108.2   | 401.5   |
| 18                    | Clonidine (0.1 mg/kg, s.c.)   | 112.1                       | 397.4   | 251.7  | 500.0   | 369.8  | 500.0   | 167.6  | 225.9   | 116.0   | 439.6   |
| 38                    | Clonidine (0.1 mg/kg, s.c.)   | 108.5                       | 360.0   | 284.3  | 500.0   | 451.1  | 369.5   | 179.4  | 433.5   | 94.6    | 439.5   |
| 47                    | Clonidine (0.1 mg/kg, s.c.)   | 97.4                        | 396.7   | 251.4  | 319.5   | 347.8  | 500.0   | 201.8  | 351.5   | 115.6   | 438.0   |
| 55                    | Clonidine (0.1 mg/kg, s.c.)   | 90.8                        | 500.0   | 368.7  | 309.9   | 211.1  | 406.2   | 163.9  | 422.6   | 91.9    | 212.6   |
| 61                    | Clonidine (0.1 mg/kg, s.c.)   | 118.6                       | 390.9   | 206.0  | 459.9   | 248.0  | 448.6   | 163.2  | 315.9   | 92.4    | 356.3   |
| 64                    | Clonidine (0.1 mg/kg, s.c.)   | 81.3                        | 425.4   | 290.9  | 500.0   | 219.5  | 500.0   | 272.4  | 406.2   | 127.6   | 433.1   |
| 65                    | Clonidine (0.1 mg/kg, s.c.)   | 100.3                       | 490.0   | 230.0  | 490.3   | 235.4  | 500.0   | 98.8   | 419.0   | 113.5   | 362.3   |
| 81                    | Clonidine (0.1 mg/kg, s.c.)   | 104.4                       | 389.2   | 252.6  | 411.3   | 372.3  | 447.6   | 109.4  | 325.3   | 71.2    | 500.0   |



**Table 68. Individual joint compression data for MIA Trial 3 Day 14.**

| Joint Compression (g) |                               | Day 14 Joint Compression (g) |         |        |         |        |         |        |         |         |         |
|-----------------------|-------------------------------|------------------------------|---------|--------|---------|--------|---------|--------|---------|---------|---------|
| Rat #                 | Treatment                     | Baseline                     |         | 1 hour |         | 3 hour |         | 5 hour |         | 24 hour |         |
|                       |                               | Ipsi.                        | Contra. | Ipsi.  | Contra. | Ipsi.  | Contra. | Ipsi.  | Contra. | Ipsi.   | Contra. |
| 3                     | Vehicle (saline, 30 µl, i.a.) | 116.5                        | 500.0   | 79.9   | 500.0   | 83.5   | 316.2   | 106.8  | 471.1   | 101.3   | 486.8   |
| 15                    | Vehicle (saline, 30 µl, i.a.) | 103.6                        | 500.0   | 82.8   | 340.8   | 104.4  | 329.9   | 96.1   | 334.1   | 119.0   | 500.0   |
| 27                    | Vehicle (saline, 30 µl, i.a.) | 88.4                         | 499.8   | 85.9   | 368.0   | 95.1   | 471.4   | 85.0   | 420.5   | 77.8    | 500.0   |
| 32                    | Vehicle (saline, 30 µl, i.a.) | 83.9                         | 305.2   | 106.2  | 444.1   | 81.3   | 432.3   | 113.9  | 453.2   | 81.6    | 414.0   |
| 34                    | Vehicle (saline, 30 µl, i.a.) | 92.0                         | 500.0   | 74.4   | 464.5   | 85.6   | 429.2   | 98.6   | 500.0   | 78.4    | 500.0   |
| 56                    | Vehicle (saline, 30 µl, i.a.) | 86.2                         | 410.8   | 92.5   | 481.8   | 104.2  | 412.7   | 103.9  | 449.8   | 122.5   | 325.4   |
| 72                    | Vehicle (saline, 30 µl, i.a.) | 110.9                        | 399.1   | 100.7  | 500.0   | 126.2  | 324.4   | 84.2   | 422.4   | 106.3   | 500.0   |
| 78                    | Vehicle (saline, 30 µl, i.a.) | 103.6                        | 408.5   | 75.5   | 410.4   | 94.1   | 500.0   | 91.9   | 358.7   | 92.2    | 294.7   |
| 85                    | Vehicle (saline, 30 µl, i.a.) | 114.0                        | 450.7   | 108.2  | 436.4   | 109.1  | 458.0   | 109.8  | 500.0   | 115.8   | 464.4   |
| 88                    | Vehicle (saline, 30 µl, i.a.) | 117.9                        | 413.5   | 103.4  | 246.2   | 78.4   | 316.0   | 127.4  | 366.7   | 111.9   | 330.5   |
| 8                     | Compound A (4.5 µg, i.a.)     | 119.9                        | 500.0   | 97.5   | 381.2   | 119.6  | 500.0   | 104.1  | 500.0   | 126.2   | 361.4   |
| 10                    | Compound A (4.5 µg, i.a.)     | 107.0                        | 500.0   | 85.7   | 434.8   | 92.3   | 427.4   | 133.3  | 465.8   | 115.2   | 444.1   |
| 20                    | Compound A (4.5 µg, i.a.)     | 112.8                        | 495.9   | 106.8  | 376.2   | 113.2  | 393.6   | 105.8  | 347.3   | 90.3    | 454.1   |
| 26                    | Compound A (4.5 µg, i.a.)     | 124.9                        | 452.2   | 110.0  | 417.1   | 115.6  | 323.3   | 113.7  | 466.2   | 107.1   | 428.2   |
| 33                    | Compound A (4.5 µg, i.a.)     | 99.3                         | 415.3   | 81.2   | 327.9   | 104.4  | 362.0   | 86.4   | 312.3   | 101.0   | 443.2   |
| 36                    | Compound A (4.5 µg, i.a.)     | 85.7                         | 500.0   | 117.8  | 408.9   | 117.4  | 371.9   | 83.4   | 358.5   | 103.3   | 470.1   |
| 40                    | Compound A (4.5 µg, i.a.)     | 88.5                         | 500.0   | 115.3  | 338.1   | 93.8   | 352.1   | 110.1  | 397.9   | 116.9   | 482.2   |
| 57                    | Compound A (4.5 µg, i.a.)     | 116.2                        | 414.8   | 105.6  | 412.2   | 100.2  | 432.5   | 94.7   | 477.4   | 75.2    | 417.1   |
| 66                    | Compound A (4.5 µg, i.a.)     | 96.4                         | 500.0   | 98.7   | 274.1   | 79.3   | 418.1   | 100.0  | 500.0   | 116.5   | 426.5   |
| 74                    | Compound A (4.5 µg, i.a.)     | 111.7                        | 460.9   | 268.3  | 463.0   | 117.6  | 401.1   | 99.5   | 361.6   | 107.6   | 301.3   |
| 13                    | Compound B (30 ng, i.a.)      | 107.0                        | 361.1   | 189.6  | 375.1   | 107.4  | 365.5   | 101.2  | 395.1   | 119.1   | 449.8   |
| 17                    | Compound B (30 ng, i.a.)      | 116.2                        | 364.3   | 110.6  | 500.0   | 112.1  | 337.1   | 91.4   | 377.1   | 116.3   | 500.0   |
| 23                    | Compound B (30 ng, i.a.)      | 97.4                         | 371.4   | 96.0   | 276.7   | 95.5   | 286.0   | 84.1   | 500.0   | 118.8   | 280.7   |
| 24                    | Compound B (30 ng, i.a.)      | 110.4                        | 450.0   | 98.5   | 409.1   | 80.1   | 366.1   | 86.4   | 500.0   | 106.7   | 417.3   |
| 41                    | Compound B (30 ng, i.a.)      | 87.9                         | 500.0   | 120.8  | 421.3   | 98.1   | 450.8   | 81.8   | 410.9   | 85.1    | 420.3   |
| 43                    | Compound B (30 ng, i.a.)      | 89.1                         | 487.3   | 111.8  | 293.2   | 122.2  | 462.9   | 99.3   | 305.9   | 91.2    | 499.9   |
| 50                    | Compound B (30 ng, i.a.)      | 98.5                         | 455.6   | 103.1  | 419.6   | 99.9   | 404.8   | 83.8   | 429.9   | 73.7    | 378.1   |
| 77                    | Compound B (30 ng, i.a.)      | 110.6                        | 460.4   | 72.2   | 432.2   | 105.1  | 500.0   | 104.5  | 403.0   | 105.3   | 451.1   |
| 82                    | Compound B (30 ng, i.a.)      | 101.5                        | 395.7   | 87.7   | 438.6   | 120.5  | 377.3   | 119.8  | 330.7   | 99.2    | 500.0   |
| 90                    | Compound B (30 ng, i.a.)      | 70.5                         | 462.5   | 95.1   | 228.6   | 103.7  | 339.9   | 103.1  | 345.5   | 85.8    | 401.6   |
| 25                    | Compound C (15 ng, i.a.)      | 86.7                         | 464.3   | 91.8   | 413.9   | 65.9   | 428.1   | 107.1  | 466.5   | 65.1    | 500.0   |
| 28                    | Compound C (15 ng, i.a.)      | 113.3                        | 344.2   | 107.1  | 359.6   | 96.8   | 439.2   | 98.1   | 418.1   | 85.2    | 347.1   |
| 39                    | Compound C (15 ng, i.a.)      | 111.9                        | 343.6   | 196.4  | 275.6   | 109.8  | 364.0   | 96.6   | 414.2   | 99.8    | 316.1   |
| 49                    | Compound C (15 ng, i.a.)      | 76.7                         | 444.4   | 103.1  | 461.2   | 79.9   | 500.0   | 93.8   | 459.0   | 123.3   | 328.4   |
| 58                    | Compound C (15 ng, i.a.)      | 122.3                        | 373.2   | 105.0  | 334.2   | 99.7   | 317.8   | 108.1  | 330.4   | 79.8    | 431.4   |
| 70                    | Compound C (15 ng, i.a.)      | 83.0                         | 427.0   | 86.6   | 363.1   | 105.0  | 429.0   | 111.4  | 304.2   | 102.6   | 500.0   |
| 87                    | Compound C (15 ng, i.a.)      | 104.5                        | 370.8   | 95.1   | 500.0   | 140.4  | 413.7   | 103.5  | 396.0   | 112.2   | 431.8   |
| 91                    | Compound C (15 ng, i.a.)      | 108.0                        | 472.8   | 98.2   | 418.3   | 107.7  | 370.0   | 112.5  | 388.9   | 81.0    | 315.8   |
| 95                    | Compound C (15 ng, i.a.)      | 100.8                        | 424.1   | 85.3   | 430.4   | 129.3  | 492.4   | 100.2  | 453.7   | 117.2   | 500.0   |
| 98                    | Compound C (15 ng, i.a.)      | 98.4                         | 476.7   | 82.1   | 464.5   | 97.1   | 376.5   | 121.1  | 442.5   | 93.3    | 275.6   |
| 21                    | Compound D (0.1 mg, i.a.)     | 116.8                        | 500.0   | 73.7   | 412.3   | 117.7  | 381.9   | 107.3  | 467.9   | 108.0   | 446.1   |
| 30                    | Compound D (0.1 mg, i.a.)     | 85.5                         | 447.0   | 110.5  | 473.0   | 110.6  | 363.6   | 106.8  | 341.0   | 104.8   | 338.8   |
| 42                    | Compound D (0.1 mg, i.a.)     | 114.3                        | 500.0   | 118.8  | 378.3   | 111.1  | 315.3   | 92.2   | 488.5   | 109.6   | 500.0   |
| 53                    | Compound D (0.1 mg, i.a.)     | 72.6                         | 427.2   | 99.5   | 337.0   | 109.7  | 386.3   | 123.7  | 472.1   | 106.1   | 500.0   |
| 71                    | Compound D (0.1 mg, i.a.)     | 102.4                        | 462.0   | 95.0   | 395.9   | 107.2  | 349.5   | 102.5  | 444.0   | 87.0    | 415.9   |
| 75                    | Compound D (0.1 mg, i.a.)     | 107.5                        | 405.6   | 159.2  | 430.5   | 124.6  | 447.0   | 99.0   | 322.4   | 114.8   | 466.2   |
| 76                    | Compound D (0.1 mg, i.a.)     | 83.6                         | 437.1   | 124.2  | 440.0   | 134.0  | 471.7   | 100.0  | 347.9   | 85.3    | 432.2   |
| 86                    | Compound D (0.1 mg, i.a.)     | 128.6                        | 437.2   | 89.1   | 368.2   | 112.8  | 387.4   | 80.5   | 309.3   | 119.7   | 500.0   |
| 97                    | Compound D (0.1 mg, i.a.)     | 127.6                        | 296.1   | 107.1  | 410.1   | 109.0  | 385.2   | 98.4   | 403.5   | 95.1    | 289.8   |
| 99                    | Compound D (0.1 mg, i.a.)     | 126.8                        | 359.7   | 98.6   | 423.1   | 108.6  | 356.9   | 84.7   | 495.0   | 83.4    | 346.6   |
| 7                     | Compound E (500 ng, i.a.)     | 76.8                         | 500.0   | 147.8  | 500.0   | 107.9  | 500.0   | 103.2  | 393.6   | 109.3   | 454.8   |
| 11                    | Compound E (500 ng, i.a.)     | 126.3                        | 442.7   | 117.2  | 497.5   | 150.4  | 473.0   | 89.3   | 418.3   | 106.1   | 460.5   |
| 22                    | Compound E (500 ng, i.a.)     | 73.5                         | 396.2   | 133.9  | 378.6   | 108.4  | 382.2   | 99.9   | 466.2   | 95.7    | 444.8   |
| 44                    | Compound E (500 ng, i.a.)     | 108.0                        | 454.6   | 110.8  | 462.3   | 97.3   | 366.8   | 131.2  | 382.9   | 85.2    | 500.0   |
| 46                    | Compound E (500 ng, i.a.)     | 116.7                        | 398.4   | 89.8   | 313.6   | 62.9   | 451.7   | 104.2  | 283.1   | 82.1    | 335.1   |
| 52                    | Compound E (500 ng, i.a.)     | 77.7                         | 435.7   | 97.3   | 249.1   | 99.2   | 393.8   | 76.6   | 390.6   | 87.1    | 241.9   |
| 63                    | Compound E (500 ng, i.a.)     | 89.0                         | 462.2   | 83.3   | 431.5   | 87.6   | 297.4   | 94.0   | 317.9   | 77.8    | 500.0   |
| 68                    | Compound E (500 ng, i.a.)     | 93.5                         | 500.0   | 112.0  | 386.3   | 123.7  | 443.2   | 95.8   | 450.7   | 61.1    | 437.2   |
| 89                    | Compound E (500 ng, i.a.)     | 78.1                         | 451.4   | 120.4  | 500.0   | 84.2   | 324.4   | 88.5   | 435.5   | 96.9    | 310.0   |
| 96                    | Compound E (500 ng, i.a.)     | 110.3                        | 420.3   | 111.2  | 315.3   | 136.3  | 357.5   | 119.6  | 409.6   | 94.1    | 426.3   |
| 14                    | Compound F (0.15 mg, i.a.)    | 108.0                        | 273.0   | 103.3  | 500.0   | 128.8  | 500.0   | 92.0   | 479.3   | 77.4    | 447.1   |
| 29                    | Compound F (0.15 mg, i.a.)    | 114.8                        | 429.9   | 148.9  | 404.9   | 103.8  | 298.6   | 115.0  | 397.2   | 95.5    | 388.4   |
| 45                    | Compound F (0.15 mg, i.a.)    | 127.8                        | 363.7   | 100.7  | 468.2   | 117.9  | 472.1   | 113.7  | 500.0   | 113.3   | 317.4   |
| 48                    | Compound F (0.15 mg, i.a.)    | 97.9                         | 439.4   | 120.8  | 419.9   | 98.3   | 500.0   | 105.0  | 265.2   | 92.0    | 411.7   |
| 51                    | Compound F (0.15 mg, i.a.)    | 105.0                        | 500.0   | 100.6  | 484.2   | 95.4   | 382.5   | 102.1  | 478.6   | 115.3   | 297.1   |
| 54                    | Compound F (0.15 mg, i.a.)    | 93.1                         | 422.2   | 156.3  | 500.0   | 115.7  | 312.5   | 93.5   | 484.6   | 103.7   | 411.1   |
| 59                    | Compound F (0.15 mg, i.a.)    | 99.7                         | 391.6   | 126.6  | 316.2   | 77.5   | 405.7   | 83.2   | 355.1   | 89.8    | 345.3   |
| 73                    | Compound F (0.15 mg, i.a.)    | 109.2                        | 400.2   | 140.4  | 338.6   | 124.6  | 292.8   | 112.3  | 448.5   | 89.8    | 241.3   |
| 80                    | Compound F (0.15 mg, i.a.)    | 89.1                         | 445.9   | 116.4  | 444.9   | 113.7  | 485.9   | 89.9   | 421.2   | 77.7    | 500.0   |
| 94                    | Compound F (0.15 mg, i.a.)    | 92.8                         | 471.2   | 69.2   | 474.7   | 92.2   | 323.9   | 91.3   | 349.4   | 120.5   | 294.3   |
| 1                     | Clonidine (0.1 mg/kg, s.c.)   | 86.6                         | 500.0   | 262.6  | 500.0   | 152.6  | 420.9   | 116.2  | 324.1   | 119.7   | 231.1   |
| 12                    | Clonidine (0.1 mg/kg, s.c.)   | 109.7                        | 466.0   | 237.1  | 443.1   | 267.6  | 441.7   | 132.2  | 371.3   | 108.0   | 374.7   |
| 18                    | Clonidine (0.1 mg/kg, s.c.)   | 124.3                        | 320.6   | 290.6  | 500.0   | 221.3  | 450.1   | 159.3  | 493.9   | 96.9    | 361.4   |
| 38                    | Clonidine (0.1 mg/kg, s.c.)   | 116.0                        | 430.6   | 297.4  | 500.0   | 303.7  | 500.0   | 162.5  | 291.4   | 95.4    | 449.1   |
| 47                    | Clonidine (0.1 mg/kg, s.c.)   | 97.8                         | 404.2   | 252.6  | 391.6   | 194.0  | 328.5   | 147.0  | 500.0   | 98.7    | 433.5   |
| 55                    | Clonidine (0.1 mg/kg, s.c.)   | 73.9                         | 378.6   | 298.2  | 500.0   | 172.2  | 446.8   | 91.9   | 447.5   | 82.8    | 500.0   |
| 61                    | Clonidine (0.1 mg/kg, s.c.)   | 111.1                        | 438.7   | 215.3  | 418.1   | 203.7  | 449.8   | 117.9  | 412.6   | 65.8    | 364.5   |
| 64                    | Clonidine (0.1 mg/kg, s.c.)   | 128.1                        | 496.4   | 189.6  | 464.3   | 176.0  | 478.1   | 157.3  | 454.1   | 125.3   | 407.3   |
| 65                    | Clonidine (0.1 mg/kg, s.c.)   | 100.5                        | 500.0   | 179.4  | 500.0   | 193.0  | 422.4   | 138.0  | 388.5   | 81.8    | 500.0   |
| 81                    | Clonidine (0.1 mg/kg, s.c.)   | 96.9                         | 467.5   | 160.8  | 500.0   | 254.3  | 441.7   | 114.1  | 364.1   | 106.3   | 462.4   |

**Table 69.** Individual joint compression data for MIA Trial 3 Day 21.

| Joint Compression (g) |                               | Day 21 Joint Compression (g) |         |        |         |        |         |        |         |         |         |
|-----------------------|-------------------------------|------------------------------|---------|--------|---------|--------|---------|--------|---------|---------|---------|
| Rat #                 | Treatment                     | Baseline                     |         | 1 hour |         | 3 hour |         | 5 hour |         | 24 hour |         |
|                       |                               | Ipsi.                        | Contra. | Ipsi.  | Contra. | Ipsi.  | Contra. | Ipsi.  | Contra. | Ipsi.   | Contra. |
| 3                     | Vehicle (saline, 30 µl, i.a.) | 117.2                        | 477.3   | 85.6   | 500.0   | 106.8  | 345.1   | 93.0   | 459.9   | 94.9    | 368.1   |
| 15                    | Vehicle (saline, 30 µl, i.a.) | 108.5                        | 467.8   | 110.7  | 500.0   | 92.7   | 394.2   | 129.9  | 442.6   | 101.0   | 389.0   |
| 27                    | Vehicle (saline, 30 µl, i.a.) | 85.9                         | 335.8   | 121.9  | 386.9   | 101.6  | 245.1   | 102.3  | 341.1   | 112.1   | 483.1   |
| 32                    | Vehicle (saline, 30 µl, i.a.) | 80.0                         | 500.0   | 107.3  | 457.9   | 72.9   | 356.4   | 94.7   | 479.3   | 122.3   | 500.0   |
| 34                    | Vehicle (saline, 30 µl, i.a.) | 84.5                         | 408.4   | 74.3   | 500.0   | 91.5   | 336.2   | 104.8  | 367.1   | 107.0   | 399.9   |
| 56                    | Vehicle (saline, 30 µl, i.a.) | 85.0                         | 372.2   | 99.8   | 422.5   | 105.7  | 459.5   | 93.9   | 424.4   | 69.9    | 442.6   |
| 72                    | Vehicle (saline, 30 µl, i.a.) | 100.5                        | 477.9   | 75.0   | 426.5   | 94.4   | 453.4   | 76.6   | 490.5   | 117.2   | 404.1   |
| 78                    | Vehicle (saline, 30 µl, i.a.) | 46.9                         | 444.7   | 94.3   | 417.4   | 82.0   | 258.9   | 93.8   | 475.8   | 109.0   | 297.9   |
| 85                    | Vehicle (saline, 30 µl, i.a.) | 70.2                         | 500.0   | 95.6   | 359.7   | 123.0  | 390.4   | 101.4  | 486.0   | 126.6   | 492.2   |
| 88                    | Vehicle (saline, 30 µl, i.a.) | 92.5                         | 433.3   | 107.4  | 446.9   | 104.6  | 281.7   | 94.7   | 377.8   | 111.5   | 500.0   |
| 8                     | Compound A (4.5 µg, i.a.)     | 104.6                        | 464.9   | 93.4   | 369.1   | 128.1  | 321.9   | 87.2   | 289.0   | 105.2   | 500.0   |
| 10                    | Compound A (4.5 µg, i.a.)     | 93.5                         | 374.9   | 78.1   | 500.0   | 115.6  | 418.0   | 109.0  | 332.9   | 113.3   | 422.1   |
| 20                    | Compound A (4.5 µg, i.a.)     | 91.3                         | 457.8   | 108.0  | 489.3   | 78.9   | 500.0   | 109.5  | 382.3   | 103.1   | 456.6   |
| 26                    | Compound A (4.5 µg, i.a.)     | 67.7                         | 387.8   | 152.5  | 398.4   | 112.8  | 311.4   | 103.7  | 290.4   | 98.0    | 491.7   |
| 33                    | Compound A (4.5 µg, i.a.)     | 117.2                        | 387.7   | 80.1   | 274.8   | 50.3   | 309.0   | 98.4   | 346.0   | 38.1    | 480.7   |
| 36                    | Compound A (4.5 µg, i.a.)     | 85.0                         | 346.3   | 50.3   | 463.8   | 96.4   | 211.4   | 92.8   | 329.3   | 111.4   | 500.0   |
| 40                    | Compound A (4.5 µg, i.a.)     | 107.2                        | 500.0   | 101.2  | 385.1   | 110.6  | 499.5   | 76.5   | 500.0   | 97.4    | 500.0   |
| 57                    | Compound A (4.5 µg, i.a.)     | 91.1                         | 465.6   | 91.5   | 500.0   | 98.6   | 362.8   | 105.0  | 500.0   | 98.7    | 422.0   |
| 66                    | Compound A (4.5 µg, i.a.)     | 102.5                        | 414.6   | 137.8  | 500.0   | 93.7   | 401.0   | 104.4  | 348.0   | 84.2    | 379.0   |
| 74                    | Compound A (4.5 µg, i.a.)     | 94.8                         | 500.0   | 114.8  | 413.2   | 92.2   | 397.8   | 106.5  | 457.2   | 109.7   | 257.7   |
| 13                    | Compound B (30 ng, i.a.)      | 95.2                         | 470.4   | 102.1  | 408.4   | 102.7  | 363.7   | 118.5  | 287.0   | 120.0   | 452.5   |
| 17                    | Compound B (30 ng, i.a.)      | 88.2                         | 499.4   | 92.9   | 356.8   | 90.3   | 248.9   | 108.9  | 353.1   | 107.0   | 429.9   |
| 23                    | Compound B (30 ng, i.a.)      | 91.2                         | 482.0   | 78.4   | 500.0   | 126.9  | 500.0   | 94.0   | 218.7   | 55.0    | 255.6   |
| 24                    | Compound B (30 ng, i.a.)      | 97.7                         | 449.0   | 113.1  | 376.6   | 105.1  | 500.0   | 50.1   | 385.8   | 111.2   | 269.7   |
| 41                    | Compound B (30 ng, i.a.)      | 93.2                         | 496.7   | 111.1  | 338.1   | 107.0  | 500.0   | 96.2   | 454.3   | 118.2   | 500.0   |
| 43                    | Compound B (30 ng, i.a.)      | 88.3                         | 387.8   | 128.6  | 435.6   | 119.2  | 410.8   | 84.4   | 410.8   | 110.2   | 500.0   |
| 50                    | Compound B (30 ng, i.a.)      | 68.0                         | 329.6   | 103.6  | 407.8   | 72.6   | 334.2   | 91.8   | 345.9   | 110.9   | 334.9   |
| 77                    | Compound B (30 ng, i.a.)      | 59.1                         | 500.0   | 106.0  | 226.9   | 107.2  | 417.9   | 98.8   | 315.6   | 77.4    | 455.9   |
| 82                    | Compound B (30 ng, i.a.)      | 89.7                         | 489.0   | 114.0  | 278.8   | 110.9  | 311.4   | 116.7  | 396.5   | 108.7   | 441.0   |
| 90                    | Compound B (30 ng, i.a.)      | 103.8                        | 418.8   | 81.7   | 213.5   | 72.9   | 371.4   | 96.1   | 500.0   | 95.6    | 450.9   |
| 25                    | Compound C (15 ng, i.a.)      | 77.7                         | 500.0   | 77.9   | 500.0   | 61.4   | 401.7   | 110.2  | 406.0   | 90.8    | 500.0   |
| 28                    | Compound C (15 ng, i.a.)      | 115.3                        | 492.8   | 59.6   | 325.5   | 113.6  | 359.4   | 53.4   | 424.8   | 93.8    | 283.0   |
| 39                    | Compound C (15 ng, i.a.)      | 117.0                        | 438.2   | 123.5  | 469.5   | 108.2  | 456.8   | 98.7   | 380.2   | 94.2    | 420.2   |
| 49                    | Compound C (15 ng, i.a.)      | 90.5                         | 496.2   | 100.3  | 465.1   | 102.9  | 500.0   | 93.8   | 408.1   | 103.6   | 386.9   |
| 58                    | Compound C (15 ng, i.a.)      | 86.2                         | 210.0   | 105.8  | 490.4   | 97.3   | 214.3   | 69.2   | 366.1   | 57.0    | 376.9   |
| 70                    | Compound C (15 ng, i.a.)      | 79.5                         | 426.4   | 114.0  | 453.2   | 73.1   | 438.1   | 83.5   | 442.6   | 91.9    | 388.4   |
| 87                    | Compound C (15 ng, i.a.)      | 86.0                         | 437.8   | 105.2  | 441.8   | 146.3  | 214.9   | 120.1  | 439.3   | 98.2    | 395.0   |
| 91                    | Compound C (15 ng, i.a.)      | 68.8                         | 469.0   | 117.1  | 369.5   | 53.6   | 386.1   | 103.4  | 440.7   | 126.9   | 500.0   |
| 95                    | Compound C (15 ng, i.a.)      | 120.2                        | 475.9   | 80.0   | 442.2   | 94.2   | 288.7   | 110.2  | 486.3   | 136.9   | 471.2   |
| 98                    | Compound C (15 ng, i.a.)      | 57.7                         | 433.0   | 120.5  | 361.0   | 55.4   | 425.1   | 96.7   | 357.2   | 110.3   | 400.8   |
| 21                    | Compound D (0.1 mg, i.a.)     | 51.9                         | 500.0   | 82.2   | 248.3   | 77.1   | 410.5   | 96.4   | 385.1   | 77.7    | 409.7   |
| 30                    | Compound D (0.1 mg, i.a.)     | 96.2                         | 377.0   | 115.1  | 441.8   | 97.4   | 375.1   | 82.6   | 359.7   | 74.9    | 369.3   |
| 42                    | Compound D (0.1 mg, i.a.)     | 102.2                        | 330.4   | 119.4  | 416.5   | 120.3  | 394.5   | 100.0  | 373.5   | 102.9   | 339.6   |
| 53                    | Compound D (0.1 mg, i.a.)     | 87.5                         | 379.3   | 117.8  | 268.1   | 55.4   | 320.7   | 107.2  | 452.0   | 100.8   | 386.8   |
| 71                    | Compound D (0.1 mg, i.a.)     | 80.1                         | 388.6   | 89.4   | 495.1   | 72.9   | 235.2   | 94.7   | 401.4   | 121.2   | 500.0   |
| 75                    | Compound D (0.1 mg, i.a.)     | 133.7                        | 408.2   | 169.2  | 315.3   | 126.9  | 500.0   | 116.9  | 399.9   | 77.7    | 447.8   |
| 76                    | Compound D (0.1 mg, i.a.)     | 87.4                         | 500.0   | 106.4  | 428.3   | 102.4  | 487.2   | 103.5  | 500.0   | 97.1    | 500.0   |
| 86                    | Compound D (0.1 mg, i.a.)     | 77.9                         | 500.0   | 176.2  | 454.4   | 108.7  | 457.1   | 107.4  | 374.3   | 92.7    | 268.3   |
| 97                    | Compound D (0.1 mg, i.a.)     | 109.6                        | 432.2   | 77.9   | 318.4   | 102.9  | 220.6   | 129.6  | 500.0   | 119.5   | 495.0   |
| 99                    | Compound D (0.1 mg, i.a.)     | 100.4                        | 494.8   | 58.3   | 500.0   | 45.8   | 427.4   | 109.0  | 308.4   | 83.2    | 430.9   |
| 7                     | Compound E (500 ng, i.a.)     | 121.3                        | 500.0   | 170.2  | 371.8   | 98.9   | 455.3   | 87.9   | 476.3   | 126.1   | 408.1   |
| 11                    | Compound E (500 ng, i.a.)     | 125.4                        | 436.7   | 155.8  | 378.6   | 66.0   | 475.0   | 49.5   | 338.7   | 60.5    | 354.0   |
| 22                    | Compound E (500 ng, i.a.)     | 85.6                         | 391.9   | 135.5  | 500.0   | 126.6  | 500.0   | 107.0  | 412.7   | 113.5   | 500.0   |
| 44                    | Compound E (500 ng, i.a.)     | 100.5                        | 427.0   | 100.9  | 487.9   | 93.1   | 500.0   | 87.9   | 439.8   | 98.1    | 469.5   |
| 46                    | Compound E (500 ng, i.a.)     | 116.5                        | 412.5   | 151.1  | 300.1   | 122.0  | 500.0   | 103.1  | 365.0   | 72.5    | 500.0   |
| 52                    | Compound E (500 ng, i.a.)     | 92.8                         | 440.5   | 106.6  | 500.0   | 109.2  | 500.0   | 92.9   | 329.4   | 64.9    | 498.0   |
| 63                    | Compound E (500 ng, i.a.)     | 111.1                        | 214.8   | 106.3  | 268.3   | 104.5  | 352.2   | 57.8   | 322.3   | 76.1    | 279.6   |
| 68                    | Compound E (500 ng, i.a.)     | 70.0                         | 500.0   | 97.5   | 422.2   | 85.6   | 500.0   | 109.0  | 375.9   | 89.1    | 391.4   |
| 89                    | Compound E (500 ng, i.a.)     | 74.2                         | 387.0   | 131.4  | 422.6   | 102.9  | 474.0   | 123.4  | 425.2   | 126.1   | 362.1   |
| 96                    | Compound E (500 ng, i.a.)     | 84.3                         | 479.7   | 104.7  | 500.0   | 120.9  | 500.0   | 108.5  | 466.2   | 115.5   | 335.0   |
| 14                    | Compound F (0.15 mg, i.a.)    | 93.3                         | 452.2   | 136.4  | 326.2   | 114.1  | 436.6   | 48.6   | 350.9   | 120.7   | 500.0   |
| 29                    | Compound F (0.15 mg, i.a.)    | 89.5                         | 401.9   | 42.0   | 421.1   | 114.1  | 305.4   | 75.5   | 264.2   | 85.2    | 456.3   |
| 45                    | Compound F (0.15 mg, i.a.)    | 91.0                         | 333.0   | 91.5   | 420.6   | 64.4   | 304.2   | 81.6   | 379.2   | 124.5   | 361.6   |
| 48                    | Compound F (0.15 mg, i.a.)    | 57.8                         | 481.8   | 51.5   | 420.0   | 109.0  | 295.6   | 134.6  | 303.2   | 94.7    | 414.9   |
| 51                    | Compound F (0.15 mg, i.a.)    | 94.1                         | 451.0   | 77.4   | 435.0   | 101.9  | 415.6   | 107.3  | 445.7   | 80.7    | 232.7   |
| 54                    | Compound F (0.15 mg, i.a.)    | 51.3                         | 455.3   | 91.3   | 220.1   | 94.0   | 381.3   | 120.4  | 364.6   | 90.3    | 415.4   |
| 59                    | Compound F (0.15 mg, i.a.)    | 91.1                         | 398.6   | 128.6  | 460.8   | 94.0   | 368.3   | 88.2   | 300.1   | 107.4   | 389.1   |
| 73                    | Compound F (0.15 mg, i.a.)    | 93.0                         | 348.2   | 166.3  | 374.0   | 76.5   | 465.8   | 116.2  | 317.5   | 105.8   | 499.3   |
| 80                    | Compound F (0.15 mg, i.a.)    | 109.8                        | 491.3   | 154.5  | 419.9   | 100.4  | 449.0   | 117.9  | 390.9   | 85.8    | 500.0   |
| 94                    | Compound F (0.15 mg, i.a.)    | 98.6                         | 319.2   | 68.2   | 268.3   | 113.0  | 420.7   | 118.7  | 391.3   | 73.3    | 454.3   |
| 1                     | Clonidine (0.1 mg/kg, s.c.)   | 136.3                        | 326.3   | 228.8  | 500.0   | 185.5  | 333.0   | 114.6  | 320.7   | 75.7    | 481.9   |
| 12                    | Clonidine (0.1 mg/kg, s.c.)   | 129.3                        | 500.0   | 238.8  | 330.8   | 198.1  | 417.9   | 86.2   | 353.1   | 103.1   | 475.9   |
| 18                    | Clonidine (0.1 mg/kg, s.c.)   | 94.9                         | 457.8   | 356.8  | 477.9   | 166.2  | 471.6   | 102.5  | 367.9   | 104.6   | 470.2   |
| 38                    | Clonidine (0.1 mg/kg, s.c.)   | 96.8                         | 389.5   | 261.1  | 500.0   | 165.4  | 466.5   | 107.3  | 448.2   | 85.3    | 324.3   |
| 47                    | Clonidine (0.1 mg/kg, s.c.)   | 72.1                         | 398.9   | 203.4  | 500.0   | 137.1  | 313.6   | 89.3   | 364.4   | 104.4   | 421.8   |
| 55                    | Clonidine (0.1 mg/kg, s.c.)   | 76.0                         | 405.0   | 262.8  | 500.0   | 196.5  | 447.3   | 81.8   | 442.7   | 91.0    | 418.5   |
| 61                    | Clonidine (0.1 mg/kg, s.c.)   | 77.3                         | 472.1   | 251.4  | 500.0   | 133.9  | 421.4   | 58.4   | 438.7   | 77.9    | 345.6   |
| 64                    | Clonidine (0.1 mg/kg, s.c.)   | 112.1                        | 417.1   | 209.1  | 500.0   | 146.5  | 477.9   | 74.2   | 292.6   | 102.0   | 493.8   |
| 65                    | Clonidine (0.1 mg/kg, s.c.)   | 108.3                        | 397.7   | 212.1  | 500.0   | 207.8  | 427.0   | 91.7   | 440.2   | 76.3    | 305.8   |
| 81                    | Clonidine (0.1 mg/kg, s.c.)   | 105.5                        | 433.6   | 182.4  | 332.4   | 173.2  | 417.6   | 57.6   | 440.2   | 104.1   | 383.2   |

**Table 70. Individual joint compression data for MIA Trial 3 Day 28.**

| Joint Compression (g) |                               | Day 28 Joint Compression (g) |         |        |         |        |         |        |         |         |         |
|-----------------------|-------------------------------|------------------------------|---------|--------|---------|--------|---------|--------|---------|---------|---------|
| Rat #                 | Treatment                     | Baseline                     |         | 1 hour |         | 3 hour |         | 5 hour |         | 24 hour |         |
|                       |                               | Ipsi.                        | Contra. | Ipsi.  | Contra. | Ipsi.  | Contra. | Ipsi.  | Contra. | Ipsi.   | Contra. |
| 3                     | Vehicle (saline, 30 µl, i.a.) | 71.4                         | 321.8   | 102.9  | 500.0   | 92.2   | 357.0   | 91.2   | 449.4   | 104.2   | 500.0   |
| 15                    | Vehicle (saline, 30 µl, i.a.) | 103.1                        | 408.3   | 72.8   | 298.0   | 82.8   | 422.5   | 67.7   | 328.9   | 72.9    | 500.0   |
| 27                    | Vehicle (saline, 30 µl, i.a.) | 96.6                         | 484.5   | 82.3   | 385.6   | 88.7   | 435.0   | 40.9   | 365.2   | 66.2    | 426.6   |
| 32                    | Vehicle (saline, 30 µl, i.a.) | 75.1                         | 456.6   | 51.9   | 480.5   | 82.3   | 500.0   | 85.9   | 382.7   | 57.4    | 500.0   |
| 34                    | Vehicle (saline, 30 µl, i.a.) | 95.4                         | 381.0   | 49.1   | 500.0   | 116.9  | 476.9   | 87.4   | 310.5   | 101.7   | 373.0   |
| 56                    | Vehicle (saline, 30 µl, i.a.) | 66.3                         | 398.9   | 87.1   | 298.0   | 60.4   | 478.3   | 79.6   | 366.0   | 107.9   | 387.7   |
| 72                    | Vehicle (saline, 30 µl, i.a.) | 101.0                        | 388.0   | 128.3  | 496.3   | 100.2  | 255.5   | 40.7   | 415.7   | 129.9   | 486.9   |
| 78                    | Vehicle (saline, 30 µl, i.a.) | 72.6                         | 500.0   | 107.0  | 500.0   | 92.6   | 500.0   | 54.8   | 474.9   | 119.5   | 500.0   |
| 85                    | Vehicle (saline, 30 µl, i.a.) | 111.3                        | 370.1   | 116.3  | 352.4   | 119.1  | 500.0   | 124.8  | 318.3   | 111.4   | 368.3   |
| 88                    | Vehicle (saline, 30 µl, i.a.) | 83.5                         | 408.3   | 94.9   | 500.0   | 69.1   | 417.5   | 68.5   | 500.0   | 85.2    | 375.0   |
| 8                     | Compound A (4.5 µg, i.a.)     | 115.6                        | 431.5   | 103.9  | 402.5   | 67.7   | 500.0   | 58.3   | 435.9   | 59.5    | 486.5   |
| 10                    | Compound A (4.5 µg, i.a.)     | 101.8                        | 492.0   | 104.9  | 383.0   | 110.6  | 274.6   | 99.9   | 341.6   | 116.5   | 424.2   |
| 20                    | Compound A (4.5 µg, i.a.)     | 115.7                        | 360.6   | 67.0   | 434.6   | 81.3   | 455.5   | 100.8  | 300.7   | 78.1    | 440.6   |
| 26                    | Compound A (4.5 µg, i.a.)     | 71.2                         | 476.2   | 82.2   | 402.2   | 88.3   | 490.8   | 57.9   | 500.0   | 97.3    | 413.2   |
| 33                    | Compound A (4.5 µg, i.a.)     | 116.0                        | 492.5   | 98.6   | 394.4   | 89.5   | 479.3   | 90.5   | 335.4   | 80.1    | 500.0   |
| 36                    | Compound A (4.5 µg, i.a.)     | 53.1                         | 457.6   | 80.9   | 463.7   | 47.7   | 500.0   | 70.9   | 450.5   | 102.9   | 326.7   |
| 40                    | Compound A (4.5 µg, i.a.)     | 92.3                         | 481.7   | 85.4   | 500.0   | 114.4  | 500.0   | 97.8   | 459.2   | 80.7    | 500.0   |
| 57                    | Compound A (4.5 µg, i.a.)     | 87.3                         | 401.2   | 67.8   | 443.7   | 106.5  | 472.8   | 96.2   | 500.0   | 122.3   | 500.0   |
| 66                    | Compound A (4.5 µg, i.a.)     | 84.5                         | 478.6   | 45.2   | 500.0   | 79.4   | 384.1   | 70.7   | 357.6   | 95.4    | 500.0   |
| 74                    | Compound A (4.5 µg, i.a.)     | 65.3                         | 457.1   | 109.0  | 450.9   | 74.8   | 500.0   | 51.8   | 471.8   | 79.9    | 500.0   |
| 13                    | Compound B (30 ng, i.a.)      | 70.2                         | 500.0   | 61.5   | 500.0   | 102.2  | 442.1   | 100.3  | 339.8   | 65.0    | 354.5   |
| 17                    | Compound B (30 ng, i.a.)      | 111.1                        | 476.9   | 87.3   | 500.0   | 97.9   | 500.0   | 97.0   | 416.6   | 45.7    | 307.4   |
| 23                    | Compound B (30 ng, i.a.)      | 53.5                         | 388.5   | 91.5   | 455.4   | 76.0   | 233.1   | 46.3   | 214.6   | 90.4    | 279.0   |
| 24                    | Compound B (30 ng, i.a.)      | 73.8                         | 500.0   | 70.5   | 306.4   | 102.5  | 389.2   | 64.6   | 439.0   | 52.8    | 500.0   |
| 41                    | Compound B (30 ng, i.a.)      | 114.8                        | 334.7   | 90.5   | 497.5   | 100.3  | 408.5   | 76.4   | 500.0   | 100.7   | 500.0   |
| 43                    | Compound B (30 ng, i.a.)      | 104.8                        | 268.5   | 103.5  | 327.4   | 50.8   | 452.7   | 127.1  | 293.0   | 105.6   | 500.0   |
| 50                    | Compound B (30 ng, i.a.)      | 63.8                         | 500.0   | 53.2   | 319.2   | 90.3   | 319.5   | 111.5  | 486.0   | 57.4    | 416.5   |
| 77                    | Compound B (30 ng, i.a.)      | 67.5                         | 412.2   | 82.7   | 388.7   | 88.5   | 364.9   | 96.2   | 345.8   | 112.5   | 348.3   |
| 82                    | Compound B (30 ng, i.a.)      | 120.6                        | 495.6   | 65.9   | 500.0   | 102.2  | 498.3   | 109.6  | 500.0   | 123.9   | 498.7   |
| 90                    | Compound B (30 ng, i.a.)      | 91.0                         | 378.5   | 92.0   | 301.9   | 93.4   | 360.6   | 80.4   | 388.5   | 76.7    | 500.0   |
| 25                    | Compound C (15 ng, i.a.)      | 93.2                         | 358.1   | 51.5   | 489.7   | 94.3   | 303.8   | 115.6  | 434.1   | 49.1    | 433.8   |
| 28                    | Compound C (15 ng, i.a.)      | 80.0                         | 252.3   | 66.6   | 353.1   | 104.0  | 392.6   | 98.3   | 312.3   | 63.5    | 484.2   |
| 39                    | Compound C (15 ng, i.a.)      | 99.0                         | 428.0   | 116.2  | 500.0   | 96.6   | 500.0   | 72.2   | 436.8   | 58.4    | 366.4   |
| 49                    | Compound C (15 ng, i.a.)      | 100.2                        | 445.3   | 105.4  | 335.8   | 121.8  | 300.9   | 122.5  | 500.0   | 63.7    | 500.0   |
| 58                    | Compound C (15 ng, i.a.)      | 76.4                         | 373.8   | 68.1   | 244.0   | 83.4   | 335.3   | 101.2  | 373.7   | 57.6    | 412.9   |
| 70                    | Compound C (15 ng, i.a.)      | 93.2                         | 488.4   | 71.2   | 500.0   | 94.6   | 500.0   | 105.3  | 500.0   | 48.6    | 500.0   |
| 87                    | Compound C (15 ng, i.a.)      | 90.5                         | 402.1   | 122.0  | 414.7   | 107.3  | 462.9   | 92.3   | 487.8   | 79.2    | 324.3   |
| 91                    | Compound C (15 ng, i.a.)      | 93.9                         | 366.9   | 86.0   | 500.0   | 66.6   | 419.2   | 83.9   | 500.0   | 95.6    | 386.3   |
| 95                    | Compound C (15 ng, i.a.)      | 77.1                         | 500.0   | 83.6   | 500.0   | 72.0   | 500.0   | 54.4   | 322.6   | 65.4    | 500.0   |
| 98                    | Compound C (15 ng, i.a.)      | 66.6                         | 486.3   | 81.9   | 416.8   | 85.4   | 420.7   | 92.2   | 399.1   | 93.7    | 362.4   |
| 21                    | Compound D (0.1 mg, i.a.)     | 77.2                         | 442.0   | 87.1   | 457.7   | 96.4   | 500.0   | 99.0   | 500.0   | 74.7    | 500.0   |
| 30                    | Compound D (0.1 mg, i.a.)     | 117.6                        | 377.1   | 47.2   | 395.2   | 103.6  | 360.6   | 62.0   | 368.7   | 50.6    | 331.8   |
| 42                    | Compound D (0.1 mg, i.a.)     | 118.6                        | 342.9   | 51.3   | 386.1   | 84.0   | 396.7   | 97.1   | 474.6   | 66.7    | 286.6   |
| 53                    | Compound D (0.1 mg, i.a.)     | 76.4                         | 385.8   | 83.6   | 414.0   | 87.6   | 325.0   | 107.0  | 266.9   | 80.6    | 270.5   |
| 71                    | Compound D (0.1 mg, i.a.)     | 58.0                         | 424.2   | 88.0   | 344.2   | 134.8  | 500.0   | 57.6   | 446.9   | 49.1    | 399.6   |
| 75                    | Compound D (0.1 mg, i.a.)     | 101.0                        | 475.0   | 99.4   | 500.0   | 113.4  | 500.0   | 135.2  | 500.0   | 81.0    | 442.0   |
| 76                    | Compound D (0.1 mg, i.a.)     | 81.3                         | 405.8   | 108.0  | 329.9   | 86.2   | 483.9   | 82.2   | 348.5   | 58.5    | 364.0   |
| 86                    | Compound D (0.1 mg, i.a.)     | 93.2                         | 401.8   | 117.8  | 329.8   | 98.5   | 327.4   | 88.6   | 423.1   | 116.5   | 337.6   |
| 97                    | Compound D (0.1 mg, i.a.)     | 129.9                        | 452.6   | 113.3  | 313.2   | 100.7  | 432.5   | 83.8   | 500.0   | 89.2    | 282.2   |
| 99                    | Compound D (0.1 mg, i.a.)     | 78.5                         | 500.0   | 79.2   | 500.0   | 79.7   | 368.1   | 85.4   | 460.4   | 89.6    | 500.0   |
| 7                     | Compound E (500 ng, i.a.)     | 109.4                        | 500.0   | 166.6  | 444.9   | 116.2  | 500.0   | 91.3   | 496.0   | 103.9   | 426.7   |
| 11                    | Compound E (500 ng, i.a.)     | 94.9                         | 364.3   | 100.2  | 302.0   | 76.5   | 361.9   | 112.1  | 408.1   | 71.9    | 467.7   |
| 22                    | Compound E (500 ng, i.a.)     | 104.5                        | 494.9   | 78.9   | 500.0   | 91.3   | 337.3   | 124.8  | 438.4   | 78.9    | 306.0   |
| 44                    | Compound E (500 ng, i.a.)     | 114.1                        | 382.4   | 70.7   | 325.5   | 113.2  | 411.7   | 85.8   | 332.4   | 76.1    | 307.3   |
| 46                    | Compound E (500 ng, i.a.)     | 100.3                        | 488.5   | 89.1   | 500.0   | 110.9  | 422.5   | 62.7   | 306.6   | 95.9    | 422.9   |
| 52                    | Compound E (500 ng, i.a.)     | 69.7                         | 455.8   | 62.0   | 407.6   | 123.8  | 500.0   | 83.1   | 237.7   | 94.5    | 458.6   |
| 63                    | Compound E (500 ng, i.a.)     | 105.6                        | 249.7   | 80.9   | 363.8   | 72.3   | 420.2   | 73.3   | 258.0   | 59.7    | 500.0   |
| 68                    | Compound E (500 ng, i.a.)     | 71.2                         | 442.9   | 92.3   | 351.8   | 114.7  | 477.8   | 87.5   | 388.9   | 81.3    | 394.6   |
| 89                    | Compound E (500 ng, i.a.)     | 111.8                        | 489.3   | 67.7   | 249.6   | 103.4  | 500.0   | 128.2  | 500.0   | 83.4    | 500.0   |
| 96                    | Compound E (500 ng, i.a.)     | 110.9                        | 500.0   | 113.2  | 363.0   | 102.7  | 404.0   | 62.4   | 500.0   | 92.2    | 443.0   |
| 14                    | Compound F (0.15 mg, i.a.)    | 121.5                        | 315.6   | 151.9  | 424.8   | 66.3   | 447.6   | 92.1   | 408.6   | 74.1    | 368.8   |
| 29                    | Compound F (0.15 mg, i.a.)    | 95.4                         | 310.3   | 52.8   | 420.7   | 91.8   | 329.4   | 74.8   | 261.0   | 28.5    | 453.4   |
| 45                    | Compound F (0.15 mg, i.a.)    | 102.2                        | 363.2   | 52.3   | 387.1   | 100.7  | 251.6   | 123.8  | 361.9   | 98.5    | 480.0   |
| 48                    | Compound F (0.15 mg, i.a.)    | 105.4                        | 332.4   | 95.9   | 469.9   | 95.4   | 433.0   | 52.8   | 333.3   | 22.7    | 353.6   |
| 51                    | Compound F (0.15 mg, i.a.)    | 66.9                         | 438.1   | 79.3   | 305.0   | 87.6   | 322.4   | 129.3  | 405.9   | 73.8    | 420.4   |
| 54                    | Compound F (0.15 mg, i.a.)    | 94.3                         | 382.8   | 121.7  | 336.0   | 91.5   | 500.0   | 88.8   | 353.1   | 78.2    | 376.9   |
| 59                    | Compound F (0.15 mg, i.a.)    | 100.4                        | 374.0   | 85.6   | 413.6   | 104.7  | 412.7   | 113.9  | 500.0   | 27.8    | 433.2   |
| 73                    | Compound F (0.15 mg, i.a.)    | 99.9                         | 340.8   | 119.7  | 350.3   | 80.1   | 293.6   | 97.7   | 240.5   | 89.0    | 317.8   |
| 80                    | Compound F (0.15 mg, i.a.)    | 98.3                         | 440.1   | 100.7  | 344.4   | 127.2  | 232.0   | 76.2   | 389.0   | 107.5   | 500.0   |
| 94                    | Compound F (0.15 mg, i.a.)    | 125.4                        | 328.4   | 118.2  | 281.9   | 114.5  | 375.6   | 136.6  | 267.6   | 54.1    | 457.4   |
| 1                     | Clonidine (0.1 mg/kg, s.c.)   | 74.2                         | 500.0   | 227.9  | 332.5   | 126.9  | 319.5   | 107.0  | 484.7   | 104.3   | 372.0   |
| 12                    | Clonidine (0.1 mg/kg, s.c.)   | 83.5                         | 405.7   | 199.1  | 359.0   | 217.2  | 500.0   | 132.5  | 359.5   | 121.3   | 434.1   |
| 18                    | Clonidine (0.1 mg/kg, s.c.)   | 110.9                        | 292.8   | 92.1   | 371.6   | 89.9   | 327.4   | 132.0  | 500.0   | 95.9    | 282.8   |
| 38                    | Clonidine (0.1 mg/kg, s.c.)   | 96.8                         | 385.5   | 21.8   | 500.0   | 158.1  | 500.0   | 136.1  | 317.3   | 81.2    | 500.0   |
| 47                    | Clonidine (0.1 mg/kg, s.c.)   | 80.3                         | 396.7   | 199.9  | 500.0   | 191.5  | 402.6   | 77.9   | 382.2   | 69.5    | 432.2   |
| 55                    | Clonidine (0.1 mg/kg, s.c.)   | 57.3                         | 500.0   | 157.1  | 433.2   | 151.7  | 500.0   | 95.4   | 469.6   | 95.0    | 449.7   |
| 61                    | Clonidine (0.1 mg/kg, s.c.)   | 62.7                         | 500.0   | 195.9  | 500.0   | 84.2   | 332.0   | 111.6  | 365.5   | 83.4    | 407.4   |
| 64                    | Clonidine (0.1 mg/kg, s.c.)   | 69.7                         | 424.6   | 193.3  | 500.0   | 172.9  | 500.0   | 70.2   | 500.0   | 92.0    | 500.0   |
| 65                    | Clonidine (0.1 mg/kg, s.c.)   | 74.2                         | 428.0   | 258.6  | 491.1   | 181.0  | 342.5   | 107.8  | 500.0   | 88.8    | 500.0   |
| 81                    | Clonidine (0.1 mg/kg, s.c.)   | 98.5                         | 367.4   | 158.6  | 500.0   | 91.9   | 325.0   | 76.5   | 406.2   | 79.4    | 500.0   |

**Weight Bearing Data for MMT/MCLT Trial 1**

**Table 71. Individual animal data for MMT/MCLT Trial 1 Baseline and Day 7 data**

| Group 1<br>Vehicle (Saline)<br>ip, QD | Trial # | Day -1 (Baseline) |        |                         |        | Day 7 (Pre tx) |       |                         |       | Day 7 (1 hr) |       |                         |       | Day 7 (3 hr) |       |                         |        | Day 7 (5 hr) |        |                         |        | Day 7 (24 hr) |       |                         |       |      |
|---------------------------------------|---------|-------------------|--------|-------------------------|--------|----------------|-------|-------------------------|-------|--------------|-------|-------------------------|-------|--------------|-------|-------------------------|--------|--------------|--------|-------------------------|--------|---------------|-------|-------------------------|-------|------|
|                                       |         | Force (g)         |        | Paw Wt Distribution (g) |        | Force (g)      |       | Paw Wt Distribution (g) |       | Force (g)    |       | Paw Wt Distribution (g) |       | Force (g)    |       | Paw Wt Distribution (g) |        | Force (g)    |        | Paw Wt Distribution (g) |        | Force (g)     |       | Paw Wt Distribution (g) |       |      |
|                                       |         | Left              | Right  | Per Trial               | Mean   | Left           | Right | Per Trial               | Mean  | Left         | Right | Per Trial               | Mean  | Left         | Right | Per Trial               | Mean   | Left         | Right  | Per Trial               | Mean   | Left          | Right | Per Trial               | Mean  |      |
| Animal 1                              | 1       | 73.01             | 92.99  | -19.98                  |        | 100.81         | 75.59 | 25.22                   |       | 95.62        | 88.45 | 7.17                    |       | 95.24        | 84.49 | 10.75                   |        | 85.19        | 72.10  | 13.09                   |        | 90.60         | 44.42 | 46.18                   |       |      |
|                                       | 2       | 72.57             | 98.79  | -26.22                  | -11.90 | 96.68          | 85.48 | 11.20                   | 19.61 | 96.78        | 87.92 | 8.86                    | 6.56  | 94.71        | 86.50 | 8.21                    |        | 84.80        | 71.50  | 13.05                   | 11.71  | 83.93         | 53.76 | 30.17                   | 34.96 |      |
|                                       | 3       | 88.15             | 77.66  | 10.49                   |        | 96.27          | 73.85 | 22.42                   |       | 85.26        | 81.62 | 3.66                    |       | 94.31        | 88.61 | 5.70                    |        | 81.36        | 72.96  | 9.00                    |        | 81.96         | 55.42 | 28.54                   |       |      |
| 2                                     | 1       | 84.79             | 101.37 | -16.58                  |        | 108.75         | 75.71 | 33.04                   |       | 85.58        | 76.91 | 8.67                    |       | 87.76        | 58.55 | 29.21                   |        | 94.53        | 69.58  | 4.95                    |        | 81.04         | 70.97 | 10.07                   |       |      |
|                                       | 2       | 64.84             | 97.60  | -32.76                  | -26.41 | 105.58         | 87.56 | 18.02                   | 26.24 | 105.88       | 76.79 | 29.09                   | 22.84 | 79.68        | 57.71 | 21.97                   | 24.02  | 99.18        | 88.63  | 10.55                   | 7.39   | 81.67         | 72.22 | 9.45                    | 9.44  |      |
|                                       | 3       | 72.92             | 100.32 | -27.40                  |        | 102.35         | 74.68 | 27.67                   |       | 108.60       | 77.83 | 30.77                   |       | 77.84        | 56.96 | 20.88                   |        | 89.59        | 82.92  | 6.67                    |        | 81.32         | 72.51 | 8.81                    |       |      |
| 3                                     | 1       | 92.70             | 65.14  | 27.56                   |        | 100.69         | 61.47 | 39.22                   |       | 102.90       | 70.18 | 32.72                   |       | 103.87       | 65.87 | 38.00                   |        | 97.73        | 54.58  | 43.15                   | 43.00  | 115.99        | 60.12 | 55.87                   |       |      |
|                                       | 2       | 87.73             | 67.03  | 20.70                   | 21.53  | 108.17         | 57.81 | 51.36                   | 46.42 | 93.94        | 88.93 | 5.11                    |       | 112.96       | 71.33 | 41.63                   | 45.84  | 80.05        | 99.29  | -19.24                  |        | 81.61         | 64.62 | 16.99                   |       |      |
|                                       | 3       | 84.39             | 88.05  | 15.34                   |        | 110.08         | 61.39 | 48.69                   |       | 114.94       | 84.90 | 30.04                   | 24.98 | 115.86       | 57.98 | 57.88                   |        | 100.04       | 56.47  | 43.57                   |        | 87.67         | 75.11 | 12.56                   | 35.22 |      |
| 4                                     | 1       | 62.89             | 80.15  | -17.26                  |        | 106.91         | 97.63 | 8.28                    |       | 106.39       | 82.29 | 24.10                   |       | 88.14        | 74.71 | 13.43                   |        | 88.09        | 102.49 | -14.40                  | -18.70 | 77.44         | 56.78 | 20.66                   |       |      |
|                                       | 2       | 83.91             | 63.14  | 20.77                   | -30.45 | 92.53          | 69.28 | 23.25                   | 4.53  | 95.18        | 78.38 | 17.80                   | 27.84 | 107.65       | 85.22 | 22.43                   | 16.78  | 80.05        | 99.29  | -19.24                  |        | 84.12         | 80.85 | 3.27                    | 18.05 |      |
|                                       | 3       | 54.88             | 89.75  | -34.87                  |        | 88.91          | 88.71 | 0.20                    |       | 112.73       | 83.34 | 29.39                   |       | 93.46        | 75.25 | 18.22                   |        | 68.83        | 91.30  | -22.47                  |        | 84.77         | 68.27 | 16.50                   |       |      |
| 5                                     | 1       | 60.12             | 86.16  | -26.04                  |        | 80.93          | 85.08 | 15.85                   |       | 94.90        | 75.74 | 19.16                   |       | 85.91        | 96.56 | -10.65                  |        | 79.25        | 59.89  | 19.36                   | 20.45  | 84.28         | 73.90 | 10.38                   |       |      |
|                                       | 2       | 60.46             | 84.30  | -23.82                  | -29.45 | 92.53          | 72.08 | 23.25                   | 17.29 | 97.26        | 81.08 | 16.18                   | 17.71 | 78.31        | 91.07 | -12.26                  | -13.21 | 81.26        | 58.52  | 22.70                   |        | 81.80         | 79.96 | 1.84                    |       |      |
|                                       | 3       | 47.11             | 85.59  | -38.48                  |        | 76.73          | 83.97 | 12.76                   |       | 97.26        | 81.08 | 16.18                   |       | 85.91        | 96.56 | -10.65                  |        | 81.26        | 58.52  | 22.70                   |        | 81.80         | 79.96 | 1.84                    |       |      |
| 6                                     | 1       | 71.29             | 83.33  | -12.04                  |        | 104.08         | 89.22 | 14.86                   |       | 93.89        | 88.20 | 5.69                    |       | 116.60       | 79.30 | 37.30                   |        | 69.85        | 68.26  | 1.59                    | 28.32  | 106.73        | 75.11 | 31.62                   |       |      |
|                                       | 2       | 74.80             | 67.03  | 7.77                    | -5.07  | 97.60          | 89.22 | 7.97                    | 10.45 | 95.18        | 78.38 | 17.80                   | 7.72  | 107.65       | 85.22 | 22.43                   | 31.59  | 91.89        | 50.46  | 41.43                   |        | 100.98        | 74.25 | 26.73                   | 34.34 |      |
|                                       | 3       | 77.99             | 78.45  | -0.46                   |        | 96.23          | 87.70 | 8.53                    |       | 85.15        | 75.05 | 10.10                   |       | 108.42       | 73.08 | 35.34                   |        | 89.56        | 47.62  | 41.94                   |        | 111.04        | 75.07 | 35.97                   |       |      |
| 7                                     | 1       | 119.09            | 77.28  | 41.81                   |        | 83.83          | 72.72 | 11.11                   |       | 87.10        | 61.54 | 25.56                   |       | 100.13       | 66.82 | 33.31                   |        | 84.11        | 65.80  | 18.51                   | 16.49  | 90.67         | 74.67 | 16.00                   |       |      |
|                                       | 2       | 106.28            | 97.81  | 8.47                    | 21.75  | 133.73         | 74.72 | 13.01                   | 11.45 | 89.68        | 64.81 | 24.87                   | 28.27 | 96.20        | 67.80 | 28.40                   | 30.21  | 80.38        | 55.31  | 15.07                   |        | 84.12         | 80.85 | 3.27                    | 12.06 |      |
|                                       | 3       | 108.04            | 93.02  | 15.02                   |        | 84.13          | 73.90 | 10.23                   |       | 98.27        | 63.14 | 35.13                   |       | 95.84        | 67.53 | 28.31                   |        | 80.96        | 65.08  | 15.88                   |        | 98.56         | 85.39 | 13.17                   |       |      |
| 8                                     | 1       | 101.71            | 78.85  | 22.86                   |        | 83.60          | 71.95 | 11.85                   |       | 83.02        | 76.62 | 16.40                   |       | 74.90        | 86.35 | -11.45                  |        | 83.79        | 69.69  | 14.10                   | 15.01  | 91.61         | 71.08 | 20.52                   |       |      |
|                                       | 2       | 93.05             | 82.81  | 10.24                   | 15.15  | 79.10          | 74.53 | 5.03                    | 6.52  | 91.69        | 83.93 | 7.76                    | 12.31 | 73.38        | 89.70 | -16.32                  | -11.67 | 80.57        | 60.86  | 19.71                   |        | 80.57         | 70.64 | 13.93                   | 22.35 |      |
|                                       | 3       | 98.11             | 85.77  | 12.34                   |        | 77.40          | 74.52 | 2.88                    |       | 90.96        | 81.35 | 9.61                    |       | 72.86        | 85.05 | -12.19                  |        | 83.61        | 68.29  | 15.32                   |        | 97.93         | 71.33 | 26.60                   |       |      |
| Mean                                  |         | 79.10             | 84.70  | -5.61                   |        | 94.29          | 76.48 | 17.82                   |       | 95.75        | 77.22 | 8.51                    |       | 92.80        | 76.33 | 16.47                   |        | 85.64        | 70.19  | 15.46                   |        | 91.70         | 70.25 | 21.45                   | 21.45 |      |
| SE                                    |         | 3.97              | 2.11   | 4.79                    |        | 2.18           | 2.18  | 2.81                    | 4.80  | 1.79         | 1.58  | 2.03                    |       | 3.11         | 2.74  | 2.49                    | 4.19   | 16.47        | 1.69   | 3.07                    | 3.74   | 6.26          | 9.70  | 2.20                    | 2.43  | 4.33 |

| Group 2<br>Morphine (10 mg/kg)<br>ip, QD | Trial # | Force (g) |        |           |        | Paw Wt Distribution (g) |       |           |       | Force (g) |        |           |        | Paw Wt Distribution (g) |       |           |       | Force (g) |       |           |       | Paw Wt Distribution (g) |       |           |       | Force (g) |       |           |      | Paw Wt Distribution (g) |       |           |      |  |
|------------------------------------------|---------|-----------|--------|-----------|--------|-------------------------|-------|-----------|-------|-----------|--------|-----------|--------|-------------------------|-------|-----------|-------|-----------|-------|-----------|-------|-------------------------|-------|-----------|-------|-----------|-------|-----------|------|-------------------------|-------|-----------|------|--|
|                                          |         | Left      |        | Right     |        | Per Trial               |       | Mean      |       | Left      |        | Right     |        | Per Trial               |       | Mean      |       | Left      |       | Right     |       | Per Trial               |       | Mean      |       | Left      |       | Right     |      | Per Trial               |       | Mean      |      |  |
|                                          |         | Left      | Right  | Per Trial | Mean   | Left                    | Right | Per Trial | Mean  | Left      | Right  | Per Trial | Mean   | Left                    | Right | Per Trial | Mean  | Left      | Right | Per Trial | Mean  | Left                    | Right | Per Trial | Mean  | Left      | Right | Per Trial | Mean | Left                    | Right | Per Trial | Mean |  |
| Animal 1                                 | 1       | 94.85     | 46.39  | 48.46     |        | 77.14                   | 68.48 | 8.66      |       | 102.36    | 81.08  | 12.28     |        | 83.88                   | 90.28 | 2.59      |       | 84.84     | 73.27 | 11.27     |       | 84.54                   | 73.27 | 11.27     |       |           |       |           |      |                         |       |           |      |  |
|                                          | 2       | 49.05     | 54.04  | 4.99      | -3.07  | 80.37                   | 74.70 | 5.67      | 22.82 | 80.10     | 64.70  | 15.40     | 12.53  | 100.37                  | 79.85 | 20.52     | 24.65 | 84.89     | 68.73 | 16.16     | 10.13 | 85.35                   | 68.25 | 17.10     | 12.07 |           |       |           |      |                         |       |           |      |  |
|                                          | 3       | 65.75     | 57.49  | 8.26      |        | 79.05                   | 64.71 | 14.34     |       | 79.05     | 64.71  | 14.34     |        | 103.50                  | 62.35 | 41.15     |       | 89.10     | 77.46 | 11.64     |       | 89.10                   | 77.46 | 11.64     |       |           |       |           |      |                         |       |           |      |  |
| 2                                        | 1       | 76.12     | 80.23  | -4.11     |        | 79.43                   | 63.17 | 16.26     |       | 63.95     | 68.97  | -5.02     |        | 71.06                   | 58.80 | 12.26     |       | 82.31     | 78.24 | 4.07      |       | 73.43                   | 62.39 | 11.04     |       |           |       |           |      |                         |       |           |      |  |
|                                          | 2       | 72.98     | 79.14  | -6.16     | -16.73 | 93.33                   | 56.37 | 36.96     | 21.82 | 70.71     | 78.64  | -7.93     | -4.50  | 87.01                   | 75.78 | 11.23     | 12.59 | 79.49     | 75.43 | 4.06      | 5.71  | 74.52                   | 55.82 | 18.70     | 17.42 |           |       |           |      |                         |       |           |      |  |
|                                          | 3       | 61.12     | 101.05 | -39.93    |        | 81.00                   | 68.77 | 12.23     |       | 74.29     | 74.83  | -0.54     |        | 67.86                   | 54.29 | 13.57     |       | 75.91     | 66.91 | 9.00      |       | 77.40                   | 54.67 | 22.73     |       |           |       |           |      |                         |       |           |      |  |
| 3                                        | 1       | 94.37     | 63.32  | 31.05     | 28.01  | 92.23                   | 65.13 | 27.10     | 21.00 | 74.18     | 71.89  | -11.71    | -15.15 | 89.99                   | 91.93 | -1.94     | -2.52 | 84.45     | 66.39 | 18.06     | 16.73 | 110.83                  | 92.64 | 18.19     | 17.27 |           |       |           |      |                         |       |           |      |  |
|                                          | 2       | 88.03     | 71.09  | 16.94     |        | 90.57                   | 63.29 | 27.28     | 24.56 | 75.42     | 92.92  | -17.50    | -15.15 | 90.46                   | 94.60 | -4.14     | -2.52 | 87.22     | 68.77 | 18.45     |       | 109.31                  | 93.35 | 15.96     | 17.27 |           |       |           |      |                         |       |           |      |  |
|                                          | 3       | 96.73     | 80.70  | 16.03     |        | 94.93                   | 78.52 | 16.41     |       | 79.91     | 80.15  | -0.24     |        | 83.99                   | 86.48 | -1.49     |       | 94.11     | 80.44 | 13.67     |       | 108.42                  | 90.77 | 17.65     |       |           |       |           |      |                         |       |           |      |  |
| 4                                        | 1       | 74.59     | 85.48  | -10.89    |        | 110.67                  | 65.51 | 45.16     |       | 83.99     | 73.19  | 10.80     |        | 76.32                   | 52.04 | 24.28     |       | 94.13     | 60.32 | 33.81     | 39.94 | 98.42                   | 76.82 | 21.60     |       |           |       |           |      |                         |       |           |      |  |
|                                          | 2       | 83.91     | 78.02  | 5.89      | -4.17  | 101.59                  | 57.00 | 44.59     | 33.37 | 99.23     | 55.25  | 43.98     | 26.92  | 100.37                  | 57.41 | 25.99     | 25.03 | 105.45    | 62.44 | 43.01     |       | 98.20                   | 77.81 | 20.39     | 14.44 |           |       |           |      |                         |       |           |      |  |
|                                          | 3       | 81.79     | 89.29  | -7.50     |        | 86.81                   | 75.46 | 10.35     |       | 80.66     | 83.68  | -2.98     |        | 74.90                   | 49.69 | 25.21     |       | 103.33    | 60.33 | 43.00     |       | 93.73                   | 92.40 | 1.33      |       |           |       |           |      |                         |       |           |      |  |
| 5                                        | 1       | 89.34     | 69.32  | 20.02     | 1.69   | 81.27                   | 71.31 | 9.96      | 21.17 | 116.02    | 105.54 | 10.48     | 13.77  | 67.63                   | 55.86 | 11.77     | 27.42 | 82.18     | 49.67 | 32.51     | 33.34 | 76.58                   | 75.97 | 0.61      | 3.71  |           |       |           |      |                         |       |           |      |  |
|                                          | 2       | 66.06     | 64.30  | 1.76      |        | 82.27                   | 66.40 | 15.87     |       | 88.16     | 78.26  | 10.90     |        | 81.54                   | 58.89 | 22.65     |       | 85.89     | 61.86 | 24.03     |       | 77.15                   | 63.85 | 13.30     |       |           |       |           |      |                         |       |           |      |  |
|                                          | 3       | 61.25     | 76.27  | -15.02    |        | 99.18                   | 62.12 | 37.06     |       | 118.08    | 100.67 | 17.41     |        | 95.17                   | 59.52 | 35.65     |       | 88.72     | 53.06 | 35.66     |       | 88.14                   | 78.07 | 10.07     |       |           |       |           |      |                         |       |           |      |  |

| Group 4<br>Cmpd A2 (0.6 mg/kg)<br>ip, QD |       | Force (g) |           | Paw Wt Distribution (g) |        | Force (g) |           | Paw Wt Distribution (g) |       | Force (g) |           | Paw Wt Distribution (g) |        | Force (g) |           | Paw Wt Distribution (g) |       | Force (g) |           | Paw Wt Distribution (g) |       |       |           |        |
|------------------------------------------|-------|-----------|-----------|-------------------------|--------|-----------|-----------|-------------------------|-------|-----------|-----------|-------------------------|--------|-----------|-----------|-------------------------|-------|-----------|-----------|-------------------------|-------|-------|-----------|--------|
| Trial #                                  | Left  | Right     | Per Trial | Mean                    | Left   | Right     | Per Trial | Mean                    | Left  | Right     | Per Trial | Mean                    | Left   | Right     | Per Trial | Mean                    | Left  | Right     | Per Trial | Mean                    | Left  | Right | Per Trial | Mean   |
| Animal 1                                 | 1     | 97.31     | 88.95     | 8.36                    | 84.40  | 74.38     | 20.13     | 84.40                   | 74.50 | 9.90      | 10.73     | 98.72                   | 68.32  | 32.40     | 92.80     | 78.95                   | 13.85 | 92.80     | 78.95     | 13.85                   | 70.02 | 95.02 | -25.00    |        |
|                                          | 2     | 59.47     | 87.50     | -27.03                  | 66.70  | 73.39     | 22.31     | 21.85                   | 88.50 | 76.10     | 11.40     | 10.73                   | 100.62 | 75.42     | 35.40     | 33.41                   | 91.80 | 76.68     | 15.12     | 15.01                   | 87.43 | 87.18 | -10.17    | -14.39 |
|                                          | 3     | 69.95     | 97.63     | -27.68                  | 83.95  | 85.26     | 23.12     |                         | 90.00 | 79.10     | 10.90     | 34.11                   | 91.25  | 80.89     | 10.36     | 5.33                    | 76.87 | 78.22     | -1.35     | -9.55                   | 88.70 | 79.10 | 9.60      | 10.72  |
| 2                                        | 1     | 91.81     | 93.28     | -1.47                   | 77.65  | 63.25     | 14.40     | 20.61                   | 97.93 | 67.94     | 29.99     | 34.11                   | 91.25  | 80.89     | 10.36     | 5.33                    | 76.87 | 78.22     | -1.35     | -9.55                   | 88.70 | 79.10 | 9.60      | 10.72  |
|                                          | 2     | 77.74     | 61.61     | 16.13                   | 69.70  | 58.49     | 11.21     |                         | 82.16 | 73.14     | 9.02      | 34.11                   | 91.25  | 80.89     | 10.36     | 5.33                    | 76.87 | 78.22     | -1.35     | -9.55                   | 88.70 | 79.10 | 9.60      | 10.72  |
|                                          | 3     | 94.89     | 74.18     | 20.71                   | 89.80  | 58.49     | 31.31     | 20.61                   | 96.99 | 64.76     | 32.23     | 34.11                   | 91.25  | 80.89     | 10.36     | 5.33                    | 76.87 | 78.22     | -1.35     | -9.55                   | 88.70 | 79.10 | 9.60      | 10.72  |
| 3                                        | 1     | 81.54     | 100.79    | -19.25                  | 74.32  | 80.55     | -6.23     | -13.84                  | 53.96 | 90.07     | -36.11    | -29.86                  | 48.78  | 76.77     | -27.99    | -20.74                  | 61.54 | 77.90     | -16.36    | -9.37                   | 79.83 | 77.26 | 2.57      | 6.56   |
|                                          | 2     | 75.65     | 104.66    | -29.01                  | 65.88  | 82.14     | -16.26    |                         | 53.07 | 87.01     | -33.94    | -29.86                  | 57.14  | 75.34     | -18.20    | -20.74                  | 69.01 | 75.34     | -6.33     | -9.37                   | 86.74 | 83.62 | 3.12      |        |
|                                          | 3     | 76.28     | 98.52     | -22.24                  | 71.07  | 90.09     | -19.02    |                         | 59.31 | 78.83     | -19.52    | -29.86                  | 61.46  | 77.49     | -16.03    | -20.74                  | 69.01 | 75.34     | -6.33     | -9.37                   | 86.74 | 83.62 | 3.12      |        |
| 4                                        | 1     | 88.73     | 83.59     | 5.14                    | 91.81  | 58.63     | 33.18     | 28.95                   | 75.32 | 70.47     | 4.85      | 20.27                   | 103.32 | 69.89     | 33.43     | 24.95                   | 99.21 | 72.04     | 27.17     | 9.07                    | 94.85 | 40.33 | 54.52     | 37.42  |
|                                          | 2     | 80.55     | 77.38     | 3.16                    | 78.10  | 53.53     | 24.57     |                         | 84.76 | 54.34     | 30.42     | 20.27                   | 103.32 | 69.89     | 33.43     | 24.95                   | 99.21 | 72.04     | 27.17     | 9.07                    | 94.85 | 40.33 | 54.52     | 37.42  |
|                                          | 3     | 93.07     | 80.89     | 12.18                   | 81.07  | 57.19     | 23.88     |                         | 84.76 | 54.34     | 30.42     | 20.27                   | 103.32 | 69.89     | 33.43     | 24.95                   | 99.21 | 72.04     | 27.17     | 9.07                    | 94.85 | 40.33 | 54.52     | 37.42  |
| 5                                        | 1     | 91.21     | 71.97     | 19.24                   | 102.04 | 73.26     | 28.78     | 22.58                   | 78.46 | 56.36     | 22.10     | 8.96                    | 95.33  | 75.82     | 19.51     | 15.21                   | 82.02 | 65.17     | 16.85     | 9.07                    | 75.76 | 43.10 | 32.66     | 37.04  |
|                                          | 2     | 77.91     | 61.87     | 16.04                   | 100.03 | 63.19     | 37.12     |                         | 78.68 | 53.15     | 25.53     | 8.96                    | 95.33  | 75.82     | 19.51     | 15.21                   | 82.02 | 65.17     | 16.85     | 9.07                    | 75.76 | 43.10 | 32.66     | 37.04  |
|                                          | 3     | 108.78    | 46.89     | 62.09                   | 91.78  | 89.94     | 1.84      |                         | 72.20 | 70.71     | 1.49      | 8.96                    | 95.33  | 75.82     | 19.51     | 15.21                   | 82.02 | 65.17     | 16.85     | 9.07                    | 75.76 | 43.10 | 32.66     | 37.04  |
| 6                                        | 1     | 48.87     | 80.37     | -31.50                  | 77.30  | 70.90     | 6.40      | 12.93                   | 82.54 | 89.35     | -6.81     | 16.50                   | 96.04  | 46.45     | 49.59     | 38.87                   | 89.27 | 58.74     | 30.53     | 32.92                   | 85.74 | 75.04 | 10.70     | 5.27   |
|                                          | 2     | 52.06     | 77.88     | -25.82                  | 80.11  | 62.12     | 17.99     | 12.93                   | 82.68 | 66.77     | 15.91     | 16.50                   | 96.04  | 46.45     | 49.59     | 38.87                   | 89.27 | 58.74     | 30.53     | 32.92                   | 85.74 | 75.04 | 10.70     | 5.27   |
|                                          | 3     | 52.07     | 83.80     | -31.73                  | 79.44  | 65.04     | 14.40     |                         | 84.76 | 64.32     | 20.44     | 16.50                   | 96.04  | 46.45     | 49.59     | 38.87                   | 89.27 | 58.74     | 30.53     | 32.92                   | 85.74 | 75.04 | 10.70     | 5.27   |
| 7                                        | 1     | 73.91     | 97.95     | -24.04                  | 82.02  | 63.08     | 18.96     | 10.60                   | 81.81 | 82.95     | -1.14     | -17.89                  | 85.93  | 63.76     | 22.17     | 18.46                   | 78.23 | 64.04     | 14.19     | 13.83                   | 80.22 | 58.97 | 21.25     | 21.80  |
|                                          | 2     | 77.32     | 89.23     | -11.91                  | 68.54  | 80.08     | -11.54    |                         | 59.61 | 84.56     | -24.95    | -17.89                  | 85.93  | 63.76     | 22.17     | 18.46                   | 78.23 | 64.04     | 14.19     | 13.83                   | 75.82 | 59.86 | 15.96     | 21.80  |
|                                          | 3     | 58.91     | 90.33     | -31.42                  | 69.39  | 62.00     | 7.39      |                         | 59.49 | 86.87     | -27.38    | -17.89                  | 85.93  | 63.76     | 22.17     | 18.46                   | 78.23 | 64.04     | 14.19     | 13.83                   | 80.22 | 58.97 | 21.25     | 21.80  |
| 8                                        | 1     | 96.77     | 51.52     | 45.25                   | 48.64  | 30.64     | 18.00     | 15.87                   | 71.09 | 56.79     | 14.30     | 16.67                   | 83.82  | 61.09     | 22.73     | 24.36                   | 80.72 | 48.19     | 32.53     | 27.76                   | 71.12 | 56.78 | 14.34     | 14.57  |
|                                          | 2     | 95.92     | 50.37     | 45.55                   | 52.57  | 38.77     | 13.80     | 15.87                   | 73.50 | 56.19     | 17.31     | 16.67                   | 86.57  | 61.99     | 24.58     | 24.36                   | 77.40 | 50.44     | 26.96     | 27.76                   | 73.91 | 56.91 | 17.00     | 14.57  |
|                                          | 3     | 80.76     | 53.01     | 27.75                   | 55.87  | 40.06     | 15.81     |                         | 74.12 | 55.73     | 18.39     | 16.67                   | 80.64  | 64.28     | 25.76     | 24.36                   | 75.89 | 52.11     | 23.78     | 27.76                   | 72.46 | 60.09 | 12.37     |        |
| Mean                                     | 79.44 | 80.63     | -1.19     | 79.14                   | 64.19  | 14.95     | 14.95     | 77.42                   | 69.88 | 7.44      | 7.44      | 87.98                   | 70.50  | 17.48     | 17.48     | 81.98                   | 68.81 | 13.15     | 13.15     | 80.52                   | 65.64 | 14.87 | 14.87     |        |
| SE                                       | 3.28  | 3.47      | 5.60      | 2.92                    | 2.96   | 2.93      | 4.60      | 2.74                    | 2.34  | 4.37      | 7.43      | 2.86                    | 1.96   | 3.79      | 6.59      | 2.41                    | 2.12  | 3.34      | 5.67      | 1.35                    | 3.29  | 3.59  | 6.10      | 6.10   |

| Group 5<br>Cmpd B1 (5 µg/kg)<br>ip, QD |      | Force (g) |           | Paw Wt Distribution (g) |       | Force (g) |           | Paw Wt Distribution (g) |       | Force (g) |           | Paw Wt Distribution (g) |        | Force (g) |           | Paw Wt Distribution (g) |       | Force (g) |           | Paw Wt Distribution (g) |        |       |           |        |
|----------------------------------------|------|-----------|-----------|-------------------------|-------|-----------|-----------|-------------------------|-------|-----------|-----------|-------------------------|--------|-----------|-----------|-------------------------|-------|-----------|-----------|-------------------------|--------|-------|-----------|--------|
| Trial #                                | Left | Right     | Per Trial | Mean                    | Left  | Right     | Per Trial | Mean                    | Left  | Right     | Per Trial | Mean                    | Left   | Right     | Per Trial | Mean                    | Left  | Right     | Per Trial | Mean                    | Left   | Right | Per Trial | Mean   |
| Animal 1                               | 1    | 69.19     | 78.17     | -8.98                   | 74.28 | 69.73     | 4.55      | 12.25                   | 90.06 | 66.28     | 23.08     | 20.38                   | 74.87  | 67.04     | 7.83      | 0.38                    | 66.04 | 78.42     | -12.38    | -7.50                   | 74.21  | 94.16 | -19.95    | -19.03 |
|                                        | 2    | 61.46     | 82.06     | -20.60                  | 66.95 | 55.38     | 11.57     |                         | 86.05 | 64.45     | 21.60     | 20.38                   | 55.94  | 52.86     | 3.08      | 0.38                    | 65.70 | 70.15     | -4.45     | -7.50                   | 74.21  | 95.50 | -21.40    | -19.03 |
|                                        | 3    | 58.56     | 89.62     | -31.06                  | 72.76 | 59.12     | 13.63     |                         | 72.76 | 66.29     | 6.46      | 20.38                   | 55.94  | 52.86     | 3.08      | 0.38                    | 65.70 | 70.15     | -4.45     | -7.50                   | 74.21  | 95.50 | -21.40    | -19.03 |
| 2                                      | 1    | 95.59     | 67.54     | 28.05                   | 89.53 | 65.45     | 24.08     | 17.67                   | 77.88 | 66.11     | 11.87     | 12.21                   | 86.49  | 74.30     | 12.19     | 15.96                   | 87.61 | 74.05     | 13.56     | 5.91                    | 91.65  | 54.38 | 37.27     | 35.18  |
|                                        | 2    | 78.15     | 62.74     | 15.41                   | 83.29 | 69.58     | 13.71     | 17.67                   | 83.29 | 69.58     | 13.71     | 12.21                   | 71.62  | 62.95     | 8.67      | 15.96                   | 89.21 | 76.37     | 12.84     | 5.91                    | 89.72  | 65.13 | 24.59     |        |
|                                        | 3    | 58.63     | 86.65     | -28.02                  | 84.51 | 69.09     | 15.42     |                         | 76.61 | 57.39     | 19.22     | 12.21                   | 85.70  | 68.89     | 16.81     | 15.96                   | 77.04 | 74.37     | 2.67      | 5.91                    | 75.00  | 41.52 | 33.68     |        |
| 3                                      | 1    | 94.76     | 89.74     | 5.02                    | 59.68 | 84.40     | -24.72    | -22.34                  | 65.11 | 49.99     | 15.12     | 12.85                   | 60.07  | 84.51     | -24.44    | -24.92                  | 59.41 | 75.31     | -15.90    | -17.75                  | 106.91 | 66.41 | 40.50     | 37.90  |
|                                        | 2    | 91.21     | 90.73     | 0.58                    | 62.00 | 79.50     | -16.90    |                         | 65.65 | 53.84     | 11.71     | 12.85                   | 61.85  | 88.68     | -26.83    | -24.92                  | 59.41 | 75.31     | -15.90    | -17.75                  | 101.39 | 71.23 | 30.16     |        |
|                                        | 3    | 97.57     | 87.07     | 10.50                   | 58.56 | 83.97     | -25.41    |                         | 67.06 | 55.35     | 11.71     | 12.85                   | 69.90  | 83.40     | -23.50    | -24.92                  | 54.37 | 75.06     | -20.69    | -17.75                  | 110.22 | 67.17 | 43.05     |        |
| 4                                      | 1    | 70.89     | 85.45     | -14.56                  | 89.75 | 79.94     | 9.81      | 6.23                    | 90.25 | 65.96     | 24.29     | 19.12                   | 85.67  | 62.32     | 23.35     | 25.08                   | 82.52 | 84.73     | -2.21     | -11.70                  | 76.17  | 86.82 | -10.65    | -10.48 |
|                                        | 2    | 71.13     | 84.68     | -13.55                  | 84.22 | 80.57     | 3.65      |                         | 90.46 | 63.32     | 27.14     | 19.12                   | 90.15  | 62.13     | 28.02     | 25.08                   | 82.52 | 84.73     | -2.21     | -11.70                  | 73.02  | 84.63 | -11.61    |        |
|                                        | 3    | 70.05     | 83.77     | -13.72                  | 92.56 | 87.33     | 5.23      |                         | 77.16 | 71.34     | 5.82      | 19.12                   | 86.41  | 62.55     | 23.86     | 25.08                   | 61.93 | 83.48     | -21.55    | -11.70                  | 68.51  | 80.06 | -11.55    |        |
| 5                                      | 1    | 89.73     | 70.41     | 19.32                   | 68.66 | 41.54     | 27.12     | 28.38                   | 95.22 | 77.10     | 18.12     | 12.16                   | 100.81 | 90.43     | 10.38     | 11.47                   | 91.71 | 68.97     | 22.74     | 30.56                   | 78.63  | 65.57 | 12.94     | 23.51  |
|                                        | 2    | 77.16     | 78.24     | -1.08                   | 74.45 | 74.24     | 0.21      | 28.38                   | 95.22 | 77.10     | 18.12     | 12.16                   | 100.81 | 90.43     | 10.38     | 11.47                   | 91.71 | 68.97     | 22.74     | 30.56                   | 78.63  | 65.57 | 12.94     | 23.51  |
|                                        | 3    | 70.79     | 75.83     | -15.04                  | 76.69 | 34.88     | 41.81     |                         | 87.48 | 78.86     | 8.62      | 12.16                   | 100.81 | 90.43     | 10.38     | 11.47                   | 91.71 | 68.97     | 22.74     | 30.56                   | 78.63  | 65.57 | 12.94     | 23.51  |
| 6                                      | 1    | 91.00     | 88.60     | 2.40                    | 95.27 | 87.87     | 7.40      | 10.05                   | 93.48 | 86.25     | 7.23      | 30.73                   | 100.97 | 87.47     | 13.50     | 18.16                   | 91.25 | 86.79     | 4.46      | 3.52                    | 81.84  | 74.98 | 6.86      | 6.42   |
|                                        | 2    | 97.70     | 83.09     | 14.61                   | 94.83 | 84.01     | 10.82     |                         | 91.29 | 59.86     | 31.42     | 30.73                   | 103.04 | 82.70     | 20.34     | 18.16                   | 90.97 | 86.86     | 4.11      | 3.52                    | 80.97  | 76.16 | 5.81      |        |
|                                        | 3    | 82.28     | 84.96     | -2.68                   | 91.00 | 79.07     | 11.93     |                         | 91.83 | 58.18     | 33.65     | 30.73                   | 97.83  | 77.18     | 20.65     | 18.16                   | 91.07 | 86.87     | 4.20      | 3.52                    |        |       |           |        |



**Table 72. Individual animal data for MMT/MCLT Trial 1 Day 14 data**

| Group 1<br>Vehicle (Saline)<br>ip, QD | Trial # | Day 14 (Pre tx) |       |                         |       | Day 14 (1 hr) |       |                         |       | Day 14 (3 hr) |       |                         |        | Day 14 (5 hr) |       |                         |       | Day 14 (24 hr) |        |                         |       |
|---------------------------------------|---------|-----------------|-------|-------------------------|-------|---------------|-------|-------------------------|-------|---------------|-------|-------------------------|--------|---------------|-------|-------------------------|-------|----------------|--------|-------------------------|-------|
|                                       |         | Force (g)       |       | Paw Wt Distribution (g) |       | Force (g)     |       | Paw Wt Distribution (g) |       | Force (g)     |       | Paw Wt Distribution (g) |        | Force (g)     |       | Paw Wt Distribution (g) |       | Force (g)      |        | Paw Wt Distribution (g) |       |
|                                       |         | Left            | Right | Per Trial               | Mean  | Left          | Right | Per Trial               | Mean  | Left          | Right | Per Trial               | Mean   | Left          | Right | Per Trial               | Mean  | Left           | Right  | Per Trial               | Mean  |
| Animal 1                              | 1       | 111.52          | 79.81 | 31.71                   |       | 110.87        | 80.78 | 30.09                   |       | 105.04        | 82.74 | 22.30                   |        | 88.47         | 84.72 | 3.75                    |       | 87.47          | 83.51  | 3.96                    |       |
|                                       | 2       | 107.46          | 77.10 | 30.86                   | 30.98 | 103.91        | 80.38 | 23.52                   | 26.86 | 115.35        | 80.39 | 34.96                   |        | 88.70         | 84.69 | 4.01                    |       | 84.98          | 82.23  | 2.75                    |       |
|                                       | 3       | 106.12          | 75.26 |                         |       | 108.91        | 81.96 | 26.95                   |       | 113.48        | 82.18 | 31.30                   | 29.52  | 89.69         | 83.93 | 5.76                    | 4.51  | 87.20          | 84.33  | 2.87                    | 3.19  |
| 2                                     | 1       | 97.14           | 91.51 | 5.63                    |       | 86.05         | 78.41 | 7.64                    |       | 73.62         | 62.31 | 11.31                   |        | 88.25         | 73.97 | 14.28                   |       | 96.01          | 89.29  | 6.72                    |       |
|                                       | 2       | 115.29          | 79.17 | 36.12                   | 22.17 | 91.09         | 87.08 | 4.01                    | 6.02  | 75.25         | 63.66 | 11.59                   | 12.88  | 92.46         | 82.28 | 10.18                   | 12.52 | 97.89          | 84.77  | 13.12                   | 12.55 |
|                                       | 3       | 106.05          | 81.29 | 24.76                   |       | 92.57         | 86.15 | 6.42                    |       | 80.12         | 64.38 | 15.74                   |        | 93.63         | 80.54 | 13.09                   |       | 98.44          | 80.63  | 17.81                   |       |
| 3                                     | 1       | 92.91           | 87.41 | 5.50                    |       | 92.39         | 82.61 | 9.78                    |       | 92.36         | 79.27 | 13.09                   |        | 96.30         | 91.72 | 4.58                    |       | 85.72          | 71.84  | 13.88                   |       |
|                                       | 2       | 106.24          | 82.34 | 23.90                   | 19.51 | 93.90         | 83.75 | 10.15                   | 9.25  | 107.78        | 78.10 | 29.68                   | 17.12  | 95.78         | 91.24 | 4.54                    | 4.05  | 83.44          | 73.75  | 9.69                    | 10.52 |
|                                       | 3       | 108.96          | 79.82 | 29.14                   |       | 93.42         | 85.59 | 7.83                    |       | 94.51         | 85.93 | 8.58                    |        | 92.46         | 89.42 | 3.04                    |       | 86.78          | 78.80  | 7.98                    |       |
| 4                                     | 1       | 96.13           | 79.07 | 17.06                   |       | 114.70        | 97.70 | 17.00                   |       | 97.38         | 79.32 | 18.06                   |        | 118.07        | 76.02 | 42.05                   |       | 110.75         | 100.52 | 10.23                   |       |
|                                       | 2       | 102.32          | 76.68 | 25.64                   | 22.46 | 111.26        | 82.35 | 28.91                   | 24.49 | 96.75         | 82.75 | 14.00                   | 16.06  | 113.42        | 80.47 | 32.95                   | 34.84 | 108.62         | 104.17 | 4.45                    | 6.40  |
|                                       | 3       | 101.25          | 76.57 | 24.68                   |       | 105.84        | 78.28 | 27.56                   |       | 98.71         | 82.59 | 16.12                   |        | 111.99        | 82.47 | 29.52                   |       | 108.27         | 103.74 | 4.53                    |       |
| 5                                     | 1       | 90.72           | 88.71 | 2.01                    | 2.19  | 93.83         | 79.06 | 14.77                   |       | 77.78         | 92.45 | -14.67                  |        | 98.19         | 84.45 | 13.74                   |       | 94.26          | 91.62  | 2.64                    |       |
|                                       | 2       | 92.37           | 89.46 | 2.91                    |       | 92.35         | 81.80 | 10.55                   | 10.85 | 78.35         | 93.05 | -14.70                  | -14.15 | 103.52        | 84.93 | 18.59                   | 14.42 | 92.51          | 91.55  | 0.96                    | 2.27  |
|                                       | 3       | 90.57           | 88.91 | 1.66                    |       | 91.37         | 84.15 | 7.22                    |       | 78.80         | 91.88 | -13.08                  |        | 97.84         | 86.91 | 10.93                   |       | 92.55          | 89.34  | 3.21                    |       |
| 6                                     | 1       | 94.70           | 63.06 | 31.64                   | 30.93 | 91.84         | 83.05 | 8.79                    |       | 86.37         | 66.49 | 19.88                   |        | 95.25         | 87.33 | 7.92                    |       | 89.30          | 57.95  | 31.35                   |       |
|                                       | 2       | 94.37           | 62.02 | 32.35                   |       | 90.62         | 81.35 | 9.27                    | 9.70  | 86.74         | 65.87 | 20.87                   | 21.06  | 88.78         | 78.60 | 10.18                   | 9.20  | 103.10         | 55.81  | 47.29                   | 42.64 |
|                                       | 3       | 93.91           | 65.11 | 28.80                   |       | 88.31         | 77.27 | 11.04                   |       | 87.50         | 65.06 | 22.44                   |        | 90.05         | 80.56 | 9.49                    |       | 105.92         | 56.65  | 49.27                   |       |
| 7                                     | 1       | 103.79          | 76.38 | 27.41                   |       | 87.50         | 77.05 | 10.45                   |       | 94.93         | 87.96 | 6.97                    |        | 93.97         | 90.00 | 3.97                    |       | 109.50         | 79.44  | 30.06                   |       |
|                                       | 2       | 102.05          | 74.79 | 27.26                   | 28.36 | 87.68         | 76.21 | 11.47                   | 12.15 | 96.59         | 88.07 | 8.52                    | 7.23   | 96.22         | 91.30 | 4.92                    | 4.78  | 106.44         | 80.85  | 25.59                   | 26.86 |
|                                       | 3       | 104.59          | 74.18 | 30.41                   |       | 89.85         | 75.33 | 14.52                   |       | 95.46         | 89.26 | 6.20                    |        | 96.69         | 91.23 | 5.46                    |       | 106.54         | 81.62  | 24.92                   |       |
| 8                                     | 1       | 97.85           | 89.13 | 8.52                    | 8.15  | 95.23         | 85.04 | 10.19                   |       | 103.93        | 78.22 | 25.71                   | 21.91  | 93.71         | 68.04 | 25.67                   | 20.44 | 72.91          | 78.38  | -5.47                   | -7.31 |
|                                       | 2       | 97.15           | 88.29 | 8.86                    |       | 103.24        | 85.88 | 17.36                   |       | 101.45        | 82.26 | 19.19                   |        | 86.84         | 71.15 | 17.69                   |       | 72.58          | 80.37  | -7.79                   |       |
|                                       | 3       | 99.72           | 92.64 | 7.08                    |       | 104.14        | 89.29 | 14.85                   |       | 101.85        | 81.02 | 20.83                   |        | 89.44         | 71.48 | 17.96                   |       | 73.96          | 82.62  | -8.66                   |       |
| Mean                                  |         | 100.54          | 79.95 | 20.59                   | 20.59 | 96.70         | 82.52 | 14.18                   | 14.18 | 93.34         | 79.38 | 13.95                   | 13.95  | 95.91         | 82.81 | 13.09                   | 13.09 | 93.96          | 81.82  | 12.14                   | 12.14 |
| SE                                    |         | 1.39            | 1.76  | 2.40                    | 3.72  | 1.77          | 1.00  | 1.57                    | 2.65  | 2.43          | 1.99  | 2.69                    | 4.64   | 1.67          | 1.40  | 2.12                    | 3.70  | 2.43           | 2.60   | 3.17                    | 5.57  |

| Group 2<br>Morphine (10 mg/kg)<br>ip, QD | Trial # | Force (g) |       |           |       | Paw Wt Distribution (g) |        |           |        | Force (g) |        |           |        | Paw Wt Distribution (g) |        |           |        | Force (g) |        |           |        | Paw Wt Distribution (g) |       |           |      |
|------------------------------------------|---------|-----------|-------|-----------|-------|-------------------------|--------|-----------|--------|-----------|--------|-----------|--------|-------------------------|--------|-----------|--------|-----------|--------|-----------|--------|-------------------------|-------|-----------|------|
|                                          |         | Left      |       | Right     |       | Per Trial               |        | Mean      |        | Left      |        | Right     |        | Per Trial               |        | Mean      |        | Left      |        | Right     |        | Per Trial               |       | Mean      |      |
|                                          |         | Left      | Right | Per Trial | Mean  | Left                    | Right  | Per Trial | Mean   | Left      | Right  | Per Trial | Mean   | Left                    | Right  | Per Trial | Mean   | Left      | Right  | Per Trial | Mean   | Left                    | Right | Per Trial | Mean |
| Animal 1                                 | 1       | 83.29     | 84.86 | -1.57     |       | 84.36                   | 81.81  | 2.55      |        | 84.64     | 94.86  | -10.22    |        | 68.97                   | 106.13 | -37.16    |        | 98.93     | 85.84  | 13.09     |        |                         |       |           |      |
|                                          | 2       | 73.22     | 85.93 | -12.71    | -6.08 | 87.86                   | 86.07  | 1.79      | 2.48   | 87.23     | 98.56  | -11.33    | -11.98 | 73.29                   | 102.49 | -29.20    | -30.71 | 93.71     | 86.04  | 7.67      | 9.08   |                         |       |           |      |
|                                          | 3       | 81.03     | 84.98 | -3.95     |       | 89.54                   | 86.44  | 3.10      |        | 85.17     | 99.57  | -14.40    |        | 77.01                   | 102.77 | -25.76    |        | 91.59     | 85.11  | 6.48      |        |                         |       |           |      |
| 2                                        | 1       | 82.82     | 77.78 | 5.04      | 9.60  | 81.58                   | 108.49 | -26.91    |        | 82.48     | 63.77  | 18.71     | 22.31  | 83.42                   | 70.44  | 12.98     | 8.49   | 76.28     | 71.50  | 4.78      | 6.32   |                         |       |           |      |
|                                          | 2       | 87.96     | 84.90 | 3.06      |       | 82.70                   | 106.53 | -23.83    | -25.45 | 88.42     | 57.54  | 30.88     |        | 77.58                   | 73.46  | 3.92      |        | 83.42     | 74.24  | 9.18      |        |                         |       |           |      |
|                                          | 3       | 100.79    | 80.09 | 20.70     |       | 82.87                   | 108.49 | -25.62    |        | 86.32     | 68.97  | 17.35     |        | 85.14                   | 76.57  | 8.57      |        | 86.17     | 81.18  | 4.99      |        |                         |       |           |      |
| 3                                        | 1       | 108.33    | 87.44 | 20.89     |       | 101.31                  | 85.93  | 15.38     |        | 90.56     | 98.72  | -8.16     | -4.21  | 68.56                   | 112.49 | -43.93    | -43.42 | 79.65     | 102.03 | -22.38    | -18.55 |                         |       |           |      |
|                                          | 2       | 107.16    | 92.07 | 15.09     | 14.39 | 100.08                  | 85.85  | 14.23     | 12.96  | 95.80     | 97.60  | -1.80     | -4.21  | 67.94                   | 110.43 | -42.49    | -43.83 | 82.86     | 103.47 | -20.61    | -12.67 |                         |       |           |      |
|                                          | 3       | 104.37    | 97.18 | 7.19      |       | 97.93                   | 88.66  | 9.27      |        | 95.95     | 98.62  | -2.67     |        | 71.20                   | 115.03 | -43.83    |        | 83.71     | 96.38  | -12.67    |        |                         |       |           |      |
| 4                                        | 1       | 90.55     | 56.83 | 33.72     | 35.05 | 108.34                  | 94.63  | 13.71     | 9.03   | 71.79     | 93.63  | -21.84    | -10.88 | 79.55                   | 67.74  | 11.81     | 14.55  | 95.03     | 80.93  | 14.10     | 11.47  |                         |       |           |      |
|                                          | 2       | 97.13     | 56.80 | 40.33     |       | 90.79                   | 83.05  | 7.74      |        | 84.17     | 88.34  | -4.17     |        | 82.61                   | 67.60  | 15.01     |        | 94.41     | 82.06  | 12.35     |        |                         |       |           |      |
|                                          | 3       | 94.56     | 63.46 | 31.10     |       | 87.51                   | 81.87  | 5.64      |        | 78.66     | 85.29  | -6.63     |        | 88.12                   | 71.28  | 16.84     |        | 87.45     | 79.48  | 7.97      |        |                         |       |           |      |
| 5                                        | 1       | 80.63     | 82.00 | -1.37     | -6.35 | 85.08                   | 75.14  | 9.94      | 8.48   | 77.20     | 68.97  | 8.23      | 6.70   | 81.47                   | 75.22  | 6.25      | 10.74  | 90.58     | 63.59  | 26.99     | 25.56  |                         |       |           |      |
|                                          | 2       | 67.37     | 82.34 | -14.97    |       | 88.33                   | 78.64  | 9.69      |        | 79.61     | 72.88  | 6.73      |        | 84.95                   | 75.12  | 9.83      |        | 82.90     | 61.33  | 21.57     |        |                         |       |           |      |
|                                          | 3       | 66.71     | 69.43 | -2.72     |       | 84.75                   | 78.95  | 5.80      |        | 79.79     | 74.65  | 5.14      |        | 90.88                   | 74.75  | 16.13     |        | 89.54     | 61.42  | 28.12     |        |                         |       |           |      |
| 6                                        | 1       | 98.34     | 82.27 | 16.07     |       | 86.83                   | 115.49 | -28.66    |        | 87.40     | 89.61  | -2.21     |        | 77.98                   | 53.16  | 24.82     |        | 98.26     | 76.52  | 21.74     |        |                         |       |           |      |
|                                          | 2       | 94.06     | 83.00 | 11.06     | 12.95 | 88.79                   | 111.68 | -22.89    | -23.38 | 88.75     | 91.11  | -2.36     | -7.17  | 71.10                   | 67.12  | 3.98      | 13.65  | 87.25     | 80.75  | 6.50      | 13.14  |                         |       |           |      |
|                                          | 3       | 93.38     | 81.65 | 11.73     |       | 87.10                   | 105.68 | -18.58    |        | 82.99     | 99.94  | -16.95    |        | 77.17                   | 65.03  | 12.14     |        | 91.25     | 80.08  | 11.17     |        |                         |       |           |      |
| 7                                        | 1       | 96.89     | 84.21 | 12.68     | 12.69 | 105.98                  | 74.72  | 31.26     | 28.17  | 107.46    | 85.11  | 22.35     | 17.49  | 113.47                  | 82.04  | 31.43     | 37.07  | 82.03     | 64.79  | 17.24     | 21.24  |                         |       |           |      |
|                                          | 2       | 103.33    | 81.44 | 21.89     |       | 101.25                  | 84.76  | 16.49     |        | 103.39    | 87.14  | 16.25     |        | 116.18                  | 76.74  | 39.44     |        | 90.55     | 68.48  | 22.07     |        |                         |       |           |      |
|                                          | 3       | 87.66     | 84.17 | 3.49      |       | 109.55                  | 72.78  | 36.77     |        | 89.53     | 75.67  | 13.86     |        | 122.59                  | 82.25  | 40.34     |        | 99.19     | 74.78  | 24.41     |        |                         |       |           |      |
| 8                                        | 1       | 66.09     | 79.35 | -13.26    | -9.28 | 74.75                   | 84.17  | -9.42     | -14.09 | 93.81     | 98.95  | -5.14     | -7.31  | 79.81                   | 72.89  | 6.92      | 4.91   | 75.94     | 81.20  | -5.26     | -3.84  |                         |       |           |      |
|                                          | 2       | 66.58     | 76.54 | -9.96     |       | 73.18                   | 88.15  | -14.97    |        | 93.22     | 99.82  | -6.60     |        | 77.73                   | 74.24  | 3.49      |        | 76.03     | 78.66  | -2.63     |        |                         |       |           |      |
|                                          | 3       | 71.13     | 75.76 | -4.63     |       | 76.27                   | 94.15  | -17.88    |        | 92.51     | 102.71 | -10.20    |        | 78.56                   | 74.24  | 4.32      |        | 76.30     | 79.94  | -3.64     |        |                         |       |           |      |
| Mean                                     |         | 87.64     | 79.77 | 7.87      | 7.87  | 89.86                   | 90.09  | -0.22     | -0.22  | 87.79     | 87.17  | 0.62      | 0.62   | 83.13                   | 81.22  | 1.91      | 1.91   | 87.21     | 79.16  | 8.05      | 8.05   |                         |       |           |      |
| SE                                       |         | 2.79      | 1.98  | 3.10      | 5.22  | 2.08                    | 2.58   | 3.79      | 6.70   | 1.76      | 2.72   | 2.76      | 4.69   | 2.98                    | 3.49   | 5.18      | 9.24   | 1.51      | 2.28   | 2.82      | 4.95   |                         |       |           |      |

| Group 3<br> |
|-------------|
|-------------|

| Group 4<br>Cmpd A2 (0.6 mg/kg)<br>ip, QD |       | Force (g) |           | Paw Wt Distribution (g) |        | Force (g) |           | Paw Wt Distribution (g) |        | Force (g) |           | Paw Wt Distribution (g) |        | Force (g) |           | Paw Wt Distribution (g) |        | Force (g) |           | Paw Wt Distribution (g) |        |      |
|------------------------------------------|-------|-----------|-----------|-------------------------|--------|-----------|-----------|-------------------------|--------|-----------|-----------|-------------------------|--------|-----------|-----------|-------------------------|--------|-----------|-----------|-------------------------|--------|------|
| Trial #                                  | Left  | Right     | Per Trial | Mean                    | Left   | Right     | Per Trial | Mean                    | Left   | Right     | Per Trial | Mean                    | Left   | Right     | Per Trial | Mean                    | Left   | Right     | Per Trial | Mean                    |        |      |
| Animal 1                                 | 1     | 87.64     | 64.49     | 23.15                   |        | 68.87     | 38.12     |                         | 67.79  | 93.67     | -25.88    |                         | 73.08  | 69.53     | 3.55      |                         | 73.51  | 71.52     | 1.99      |                         |        |      |
|                                          | 2     | 83.41     | 70.81     | 12.60                   | 15.95  | 107.68    | 64.72     | 42.96                   | 41.53  | 72.08     | 89.80     | -17.72                  | -20.22 | 75.58     | 68.77     | 6.81                    | 3.68   | 74.61     | 70.30     | 4.31                    | 3.46   |      |
|                                          | 3     | 86.57     | 74.47     | 12.10                   |        | 108.10    | 64.60     | 43.50                   |        | 71.68     | 88.75     | -17.07                  |        | 73.40     | 72.72     | 0.68                    |        | 73.60     | 69.53     | 4.07                    |        |      |
| 2                                        | 1     | 76.94     | 67.52     | 9.42                    | 9.01   | 85.30     | 70.24     | 15.06                   | 16.40  | 103.79    | 65.86     | 38.23                   |        | 71.74     | 87.61     | -15.87                  |        | 62.49     | 95.65     | -33.16                  |        |      |
|                                          | 2     | 77.12     | 67.42     | 9.70                    |        | 86.75     | 68.70     | 18.05                   |        | 107.10    | 64.49     | 42.61                   | 40.55  | 78.48     | 79.31     | -0.83                   | -10.67 | 62.72     | 88.84     | -26.12                  | -30.05 |      |
|                                          | 3     | 78.38     | 70.47     | 7.91                    |        | 84.46     | 68.37     | 16.09                   |        | 106.99    | 66.18     | 40.81                   |        | 69.04     | 84.34     | -15.30                  |        | 61.44     | 92.32     | -30.88                  |        |      |
| 3                                        | 1     | 92.89     | 74.17     | 18.72                   | 17.83  | 56.14     | 87.46     | -31.32                  | -35.12 | 81.03     | 59.66     | 21.37                   | 22.24  | 78.92     | 65.48     | 13.44                   | 17.14  | 85.53     | 65.34     | 20.19                   |        |      |
|                                          | 2     | 90.33     | 69.08     | 21.25                   |        | 57.70     | 94.70     | -37.00                  |        | 86.37     | 60.53     | 25.84                   |        | 81.92     | 65.76     | 16.16                   |        | 90.94     | 67.85     | 23.09                   | 22.02  |      |
|                                          | 3     | 86.61     | 73.10     | 13.51                   |        | 58.05     | 95.08     | -37.03                  |        | 85.52     | 66.00     | 19.52                   |        | 87.22     | 65.39     | 21.83                   |        | 94.27     | 71.50     | 22.77                   |        |      |
| 4                                        | 1     | 91.29     | 56.80     | 34.49                   | 33.75  | 96.45     | 89.99     | 6.46                    | 24.50  | 85.48     | 48.76     | 36.72                   | 29.03  | 76.19     | 57.32     | 18.87                   | 19.51  | 82.32     | 52.45     | 29.87                   | 31.04  |      |
|                                          | 2     | 89.27     | 56.97     | 32.30                   |        | 100.29    | 71.40     | 28.89                   |        | 85.88     | 62.18     | 23.70                   |        | 77.58     | 57.58     | 20.00                   |        | 84.60     | 54.28     | 30.32                   |        |      |
|                                          | 3     | 90.92     | 56.46     | 34.46                   |        | 90.81     | 52.65     | 38.16                   |        | 94.84     | 68.18     | 26.66                   |        | 78.28     | 58.61     | 19.67                   |        | 89.43     | 56.51     | 32.92                   |        |      |
| 5                                        | 1     | 70.33     | 89.36     | -19.03                  | -16.71 | 78.18     | 79.05     | -0.87                   | -0.89  | 89.96     | 72.46     | 17.50                   | 20.23  | 76.68     | 80.56     | -3.88                   | -6.82  | 79.90     | 71.18     | 8.72                    | 11.77  |      |
|                                          | 2     | 71.29     | 89.05     | -17.76                  |        | 80.82     | 81.92     | -1.10                   |        | 91.34     | 70.30     | 21.04                   |        | 73.39     | 81.00     | -7.61                   |        | 81.22     | 68.89     | 12.33                   |        |      |
|                                          | 3     | 75.68     | 89.01     | -13.33                  |        | 80.73     | 81.44     | -0.71                   |        | 91.97     | 69.83     | 22.14                   |        | 72.91     | 81.88     | -8.97                   |        | 83.14     | 68.87     | 14.27                   |        |      |
| 6                                        | 1     | 81.26     | 70.65     | 10.61                   | 14.05  | 60.50     | 66.49     | -5.99                   | -11.19 | 71.51     | 60.36     | 11.15                   | 10.62  | 79.37     | 69.44     | 9.93                    | 11.14  | 79.37     | 61.27     | 18.10                   |        |      |
|                                          | 2     | 84.59     | 71.87     | 12.72                   |        | 66.36     | 76.83     | -10.47                  |        | 70.18     | 60.41     | 9.77                    |        | 74.64     | 66.06     | 8.58                    |        | 79.06     | 60.08     | 18.98                   | 17.44  |      |
|                                          | 3     | 85.91     | 67.10     | 18.81                   |        | 57.19     | 74.31     | -17.12                  |        | 75.05     | 64.10     | 10.95                   |        | 73.54     | 58.63     | 14.91                   |        | 78.11     | 62.87     | 15.24                   |        |      |
| 7                                        | 1     | 56.65     | 85.99     | -29.34                  | -30.51 | 68.20     | 64.70     | 3.50                    | 3.88   | 87.22     | 67.37     | 19.85                   | 30.17  | 74.31     | 84.72     | -10.41                  | -11.37 | 65.48     | 89.22     | -23.74                  | -24.53 |      |
|                                          | 2     | 55.79     | 85.98     | -30.19                  |        | 77.49     | 72.20     | 5.29                    |        | 98.69     | 47.77     | 51.92                   |        | 73.75     | 88.59     | -14.84                  |        | 68.54     | 93.14     | -24.60                  |        |      |
|                                          | 3     | 55.18     | 87.18     | -32.00                  |        | 69.20     | 66.35     | 2.85                    |        | 88.33     | 69.59     | 18.74                   |        | 73.88     | 82.75     | -8.87                   |        | 69.16     | 94.41     | -25.25                  |        |      |
| 8                                        | 1     | 98.68     | 48.78     | 49.90                   | 47.97  | 58.87     | 77.90     | -19.03                  | -20.30 | 99.77     | 72.93     | 26.84                   | 36.50  | 92.38     | 62.21     | 30.17                   | 18.75  | 94.48     | 62.09     | 32.39                   | 32.60  |      |
|                                          | 2     | 99.42     | 49.45     | 49.97                   |        | 60.84     | 80.28     | -19.44                  |        | 111.43    | 72.09     | 39.34                   |        | 88.93     | 62.84     | 26.09                   |        | 92.94     | 61.31     | 31.63                   |        |      |
|                                          | 3     | 98.21     | 54.17     | 44.04                   |        | 62.36     | 84.78     | -22.42                  |        | 113.59    | 70.27     | 43.32                   |        | 90.14     | 60.37     | 30.77                   |        | 94.14     | 60.37     | 33.77                   |        |      |
| Mean                                     | 81.85 | 70.43     | 11.42     | 11.42                   | 77.48  | 75.13     | 2.35      | 2.35                    | 89.11  | 67.97     | 21.14     | 21.14                   | 77.18  | 71.79     | 5.17      | 5.17                    | 79.21  | 71.24     | 7.97      | 7.97                    |        |      |
| SE                                       | 2.61  | 2.57      | 4.96      | 4.96                    | 3.57   | 2.15      | 4.97      | 4.97                    | 2.78   | 2.23      | 3.99      | 3.99                    | 1.19   | 2.18      | 2.86      | 2.86                    | 2.16   | 2.76      | 4.65      | 4.65                    | 8.41   | 8.41 |

| Group 5<br>Cmpd B1 (5 µg/kg)<br>ip, QD |       | Force (g) |           | Paw Wt Distribution (g) |       | Force (g) |           | Paw Wt Distribution (g) |        | Force (g) |           | Paw Wt Distribution (g) |        | Force (g) |           | Paw Wt Distribution (g) |       | Force (g) |           | Paw Wt Distribution (g) |        |
|----------------------------------------|-------|-----------|-----------|-------------------------|-------|-----------|-----------|-------------------------|--------|-----------|-----------|-------------------------|--------|-----------|-----------|-------------------------|-------|-----------|-----------|-------------------------|--------|
| Trial #                                | Left  | Right     | Per Trial | Mean                    | Left  | Right     | Per Trial | Mean                    | Left   | Right     | Per Trial | Mean                    | Left   | Right     | Per Trial | Mean                    | Left  | Right     | Per Trial | Mean                    |        |
| Animal 1                               | 1     | 94.44     | 70.15     | 24.29                   | 25.08 | 76.47     | 65.68     | 10.79                   | 7.55   | 76.15     | 65.81     | 10.34                   | 11.59  | 89.00     | 71.01     | 17.99                   | 17.87 | 88.21     | 91.50     | -23.29                  | -24.99 |
|                                        | 2     | 90.56     | 71.90     | 18.66                   |       | 78.28     | 71.09     | 7.19                    |        | 80.22     | 69.24     | 11.98                   |        | 91.80     | 65.76     | 26.04                   |       | 87.33     | 91.28     | -23.95                  |        |
|                                        | 3     | 104.69    | 72.41     | 32.28                   |       | 78.47     | 73.79     | 4.68                    |        | 84.49     | 72.04     | 12.45                   |        | 92.10     | 82.51     | 9.59                    |       | 69.42     | 97.16     | -27.74                  |        |
| 2                                      | 1     | 94.35     | 65.38     | 28.97                   | 15.77 | 74.80     | 98.49     | -23.69                  | -27.05 | 81.24     | 93.71     | -12.47                  | -15.94 | 90.67     | 64.88     | 25.79                   | 34.71 | 78.60     | 77.60     | 1.00                    | 19.57  |
|                                        | 2     | 86.65     | 72.57     | 14.08                   |       | 68.53     | 99.49     | -30.96                  |        | 76.58     | 92.75     | -16.17                  |        | 101.50    | 62.14     | 39.36                   |       | 89.25     | 56.43     | 32.82                   |        |
|                                        | 3     | 84.04     | 79.78     | 4.26                    |       | 69.15     | 95.64     | -26.49                  |        | 78.75     | 97.93     | -19.18                  |        | 103.00    | 64.02     | 38.98                   |       | 91.51     | 66.61     | 24.90                   |        |
| 3                                      | 1     | 84.80     | 79.02     | 5.78                    | 7.34  | 84.68     | 61.82     | 22.86                   | 20.76  | 75.98     | 87.43     | -11.45                  | -10.22 | 89.10     | 85.89     | 3.21                    | 2.21  | 91.65     | 73.06     | 18.59                   | 19.43  |
|                                        | 2     | 89.77     | 80.04     | 9.73                    |       | 87.97     | 65.64     | 22.33                   |        | 79.70     | 89.32     | -9.62                   |        | 87.98     | 87.18     | 0.80                    |       | 92.90     | 73.61     | 19.29                   |        |
|                                        | 3     | 88.66     | 82.16     | 6.50                    |       | 89.45     | 72.36     | 17.09                   |        | 82.90     | 92.49     | -9.59                   |        | 88.53     | 85.90     | 2.63                    |       | 94.02     | 73.60     | 20.42                   |        |
| 4                                      | 1     | 71.29     | 75.48     | -4.19                   | -3.88 | 76.19     | 68.20     | 7.99                    | 8.07   | 79.95     | 91.65     | -11.70                  | -14.90 | 99.34     | 67.21     | 32.13                   | 30.36 | 77.79     | 62.90     | 14.89                   | 14.98  |
|                                        | 2     | 67.65     | 75.62     | -7.97                   |       | 75.91     | 68.00     | 7.91                    |        | 76.73     | 91.45     | -14.72                  |        | 97.98     | 68.33     | 29.65                   |       | 79.81     | 63.59     | 16.22                   |        |
|                                        | 3     | 73.78     | 73.27     | 0.51                    |       | 76.33     | 68.01     | 8.32                    |        | 73.59     | 91.66     | -18.27                  |        | 99.21     | 69.91     | 29.30                   |       | 79.38     | 65.94     | 13.84                   |        |
| 5                                      | 1     | 79.31     | 58.09     | 21.22                   | 16.41 | 106.65    | 74.78     | 31.87                   | 24.94  | 75.59     | 76.87     | -1.28                   | -4.02  | 77.01     | 79.84     | -2.83                   | 11.77 | 89.71     | 66.02     | 23.69                   | 21.28  |
|                                        | 2     | 72.48     | 55.70     | 16.78                   |       | 96.12     | 78.79     | 17.33                   |        | 78.93     | 83.45     | -4.52                   |        | 83.58     | 68.89     | 14.69                   |       | 94.62     | 68.89     | 25.93                   |        |
|                                        | 3     | 68.55     | 57.33     | 11.22                   |       | 92.35     | 66.72     | 25.63                   |        | 77.69     | 83.95     | -6.26                   |        | 92.54     | 69.10     | 23.44                   |       | 86.33     | 72.11     | 14.22                   |        |
| 6                                      | 1     | 75.71     | 82.79     | -7.08                   | -3.40 | 89.48     | 69.34     | 20.14                   | 16.54  | 76.32     | 82.84     | -6.52                   | -6.04  | 82.70     | 57.48     | 25.22                   | 30.72 | 73.88     | 64.29     | 9.59                    | 18.20  |
|                                        | 2     | 75.72     | 79.00     | -3.28                   |       | 84.40     | 69.36     | 15.04                   |        | 77.08     | 83.27     | -6.19                   |        | 83.08     | 54.15     | 28.93                   |       | 83.45     | 61.24     | 22.21                   |        |
|                                        | 3     | 77.26     | 77.10     | 0.16                    |       | 84.57     | 70.13     | 14.44                   |        | 77.69     | 83.10     | -5.41                   |        | 86.55     | 48.53     | 38.02                   |       | 86.95     | 64.14     | 22.81                   |        |
| 7                                      | 1     | 78.55     | 72.86     | 5.69                    | 5.78  | 93.31     | 92.72     | 0.59                    | 1.47   | 76.67     | 98.66     | -21.99                  | -22.48 | 72.17     | 81.48     | -9.31                   | -7.62 | 97.53     | 73.47     | 24.06                   | 21.11  |
|                                        | 2     | 81.66     | 74.66     | 7.00                    |       | 93.74     | 90.47     | 3.27                    |        | 74.92     | 96.34     | -21.42                  |        | 75.31     | 82.06     | -6.75                   |       | 99.69     | 74.50     | 25.19                   |        |
|                                        | 3     | 84.36     | 79.72     | 4.64                    |       | 92.99     | 92.43     | 0.56                    |        | 75.59     | 99.62     | -24.03                  |        | 74.60     | 81.40     | -6.80                   |       | 92.67     | 78.59     | 14.08                   |        |
| 8                                      | 1     | 70.85     | 66.53     | 4.32                    | 1.13  | 47.29     | 79.31     | -32.02                  | -29.39 | 92.12     | 55.89     | 36.23                   | 34.20  | 79.68     | 81.97     | -2.29                   | -3.07 | 79.60     | 77.31     | 2.29                    | 2.74   |
|                                        | 2     | 67.04     | 60.42     | 6.62                    |       | 59.19     | 85.33     | -27.14                  |        | 91.83     | 87.48     | 4.35                    |        | 80.43     | 84.77     | -4.34                   |       | 80.43     | 77.69     | 2.74                    |        |
|                                        | 3     | 64.55     | 72.09     | -7.54                   |       | 57.24     | 86.26     | -29.02                  |        | 90.91     | 58.88     | 32.03                   |        | 82.91     | 86.81     | -3.90                   |       | 80.50     | 77.31     | 3.19                    |        |
| Mean                                   | 80.28 | 72.25     | 8.03      | 8.03                    | 80.57 | 77.70     | 2.86      | 2.86                    | 79.64  | 83.12     | -3.48     | -3.48                   | 87.59  | 72.97     | 14.62     | 14.62                   | 84.38 | 72.84     | 11.54     | 11.54                   |        |
| SE                                     | 2.09  | 1.62      | 2.28      | 2.28                    | 2.80  | 2.42      | 4.07      | 4.07                    | 1.08   | 2.74      | 3.59      | 3.59                    | 1.77   | 2.30      | 3.40      | 3.40                    | 1.89  | 2.04      | 3.34      | 3.34                    |        |

| Group 6<br>Cmpd B2 (10 µg/kg)<br>ip, QD |      | Force (g) |           | Paw Wt Distribution (g) |      | Force (g) |           | Paw Wt Distribution (g) |      | Force (g) |           | Paw Wt Distribution (g) |      | Force (g) |           | Paw Wt Distribution (g) |  | Force (g) |  | Paw Wt Distribution (g) |  |
|-----------------------------------------|------|-----------|-----------|-------------------------|------|-----------|-----------|-------------------------|------|-----------|-----------|-------------------------|------|-----------|-----------|-------------------------|--|-----------|--|-------------------------|--|
| Trial #                                 | Left | Right     | Per Trial | Mean                    | Left | Right     | Per Trial | Mean                    | Left | Right     | Per Trial | Mean                    | Left | Right     | Per Trial | Mean                    |  |           |  |                         |  |



| Group 7<br>Cmpd C1 (100 µg/kg)<br>ip_QD |         | Force (g) |        | Paw Wt Distribution (g) |        | Force (g) |       | Paw Wt Distribution (g) |        | Force (g) |        | Paw Wt Distribution (g) |        | Force (g) |        | Paw Wt Distribution (g) |        | Force (g) |        | Paw Wt Distribution (g) |        |
|-----------------------------------------|---------|-----------|--------|-------------------------|--------|-----------|-------|-------------------------|--------|-----------|--------|-------------------------|--------|-----------|--------|-------------------------|--------|-----------|--------|-------------------------|--------|
| Animal #                                | Trial # | Left      | Right  | Per Trial               | Mean   | Left      | Right | Per Trial               | Mean   | Left      | Right  | Per Trial               | Mean   | Left      | Right  | Per Trial               | Mean   | Left      | Right  | Per Trial               | Mean   |
| Animal 1                                | 1       | 92.87     | 80.30  | 12.57                   |        | 83.35     | 93.05 | -9.70                   |        | 78.77     | 98.50  | -19.73                  |        | 66.88     | 89.80  | -22.92                  |        | 89.54     | 80.80  | 8.74                    |        |
|                                         | 2       | 90.99     | 84.17  | 6.82                    | 8.79   | 82.70     | 92.57 | -9.87                   | -9.94  | 77.34     | 96.06  | -18.72                  | -18.78 | 67.28     | 85.63  | -18.35                  | -19.55 | 90.33     | 85.05  | 5.28                    | 7.84   |
|                                         | 3       | 93.67     | 86.69  | 6.98                    |        | 82.19     | 92.45 | -10.26                  |        | 77.38     | 95.27  | -17.89                  |        | 69.75     | 87.13  | -17.38                  |        | 93.66     | 84.17  | 9.49                    |        |
| 2                                       | 1       | 97.69     | 72.86  | 24.83                   | 26.34  | 87.95     | 65.68 | 22.27                   | 21.51  | 74.49     | 83.66  | -9.17                   | -8.54  | 76.21     | 93.71  | -17.50                  | -17.75 | 80.54     | 70.07  | 10.47                   | 12.73  |
|                                         | 2       | 91.57     | 72.41  | 19.16                   |        | 86.93     | 65.49 | 21.44                   |        | 76.53     | 84.87  | -8.34                   |        | 76.22     | 93.80  | -17.58                  |        | 82.79     | 69.38  | 13.41                   |        |
|                                         | 3       | 93.48     | 58.45  | 35.03                   |        | 86.25     | 65.43 | 20.82                   |        | 75.29     | 83.40  | -8.11                   |        | 75.40     | 93.58  | -18.18                  |        | 85.14     | 70.82  | 14.32                   |        |
| 3                                       | 1       | 85.85     | 76.72  | 9.13                    | 8.95   | 68.07     | 86.76 | -18.69                  | -17.88 | 91.06     | 81.80  | 9.26                    | 7.93   | 85.78     | 105.71 | -19.93                  | -17.85 | 113.30    | 101.90 | 11.40                   | 14.31  |
|                                         | 2       | 90.76     | 81.56  | 9.20                    |        | 67.77     | 85.94 | -18.17                  |        | 90.91     | 79.92  | 10.99                   |        | 83.53     | 102.91 | -19.38                  |        | 118.03    | 102.66 | 15.37                   |        |
|                                         | 3       | 90.96     | 82.44  | 8.52                    |        | 67.25     | 84.02 | -16.77                  |        | 88.31     | 84.78  | 3.53                    |        | 79.63     | 93.86  | -14.23                  |        | 118.94    | 102.77 | 16.17                   |        |
| 4                                       | 1       | 88.44     | 66.32  | 22.12                   | 13.68  | 77.36     | 56.17 | 21.19                   | 16.60  | 81.88     | 102.17 | -20.29                  | -22.16 | 76.62     | 90.75  | -14.13                  | -13.62 | 81.02     | 68.13  | 12.89                   |        |
|                                         | 2       | 78.09     | 76.86  | 1.23                    |        | 73.00     | 58.37 | 14.63                   |        | 79.17     | 102.37 | -23.20                  |        | 77.68     | 91.80  | -14.12                  |        | 94.56     | 63.40  | 31.16                   | 22.56  |
|                                         | 3       | 81.37     | 63.67  | 17.70                   |        | 72.83     | 58.84 | 13.99                   |        | 79.62     | 102.60 | -22.98                  |        | 76.69     | 89.30  | -12.61                  |        | 91.11     | 67.47  | 23.64                   |        |
| 5                                       | 1       | 86.91     | 75.35  | 11.56                   | 24.40  | 78.54     | 67.63 | 10.91                   | 10.86  | 120.73    | 61.33  | 59.40                   | 34.39  | 105.57    | 66.24  | 39.33                   | 36.99  | 110.98    | 66.78  | 44.20                   | 44.28  |
|                                         | 2       | 85.17     | 56.97  | 28.20                   |        | 77.22     | 66.00 | 11.22                   |        | 116.62    | 96.91  | 21.71                   |        | 102.97    | 67.17  | 35.80                   | 36.99  | 112.55    | 66.85  | 45.70                   |        |
|                                         | 3       | 89.38     | 55.95  | 33.43                   |        | 77.30     | 66.84 | 10.46                   |        | 115.30    | 93.23  | 22.07                   |        | 103.27    | 67.43  | 35.84                   |        | 110.17    | 67.23  | 42.94                   |        |
| 6                                       | 1       | 66.45     | 77.25  | -10.80                  | -20.05 | 66.72     | 77.53 | -10.81                  | -11.76 | 90.14     | 78.71  | 11.43                   | 10.28  | 108.53    | 73.39  | 35.14                   | 35.48  | 56.97     | 71.85  | -14.88                  | -14.29 |
|                                         | 2       | 68.11     | 79.68  | -11.57                  |        | 65.26     | 77.10 | -11.84                  |        | 91.24     | 79.54  | 11.70                   |        | 109.50    | 73.71  | 35.79                   |        | 63.81     | 90.70  | -26.89                  |        |
|                                         | 3       | 62.92     | 100.70 | -37.78                  |        | 65.05     | 77.68 | -12.63                  |        | 90.08     | 82.38  | 7.70                    |        | 109.38    | 73.87  | 35.51                   |        | 69.38     | 70.49  | -1.11                   |        |
| 7                                       | 1       | 87.46     | 76.00  | 11.46                   | 10.71  | 107.67    | 92.14 | 15.53                   | 17.88  | 86.46     | 103.98 | -17.52                  | -16.52 | 114.10    | 59.88  | 54.22                   | 51.12  | 90.47     | 69.52  | 20.95                   | 19.49  |
|                                         | 2       | 83.69     | 69.36  | 14.33                   |        | 105.54    | 87.81 | 17.73                   |        | 84.71     | 99.79  | -15.07                  |        | 111.00    | 62.09  | 48.91                   |        | 95.30     | 83.32  | 11.98                   |        |
|                                         | 3       | 84.71     | 78.38  | 6.33                    |        | 105.02    | 84.63 | 20.39                   |        | 84.30     | 101.27 | -16.97                  |        | 115.58    | 65.36  | 50.22                   |        | 100.85    | 75.32  | 25.53                   |        |
| 8                                       | 1       | 82.42     | 68.15  | 14.27                   | 11.52  | 84.79     | 81.13 | 3.66                    | 3.26   | 81.66     | 86.30  | -4.64                   | -4.77  | 58.22     | 85.18  | -26.96                  | -29.92 | 76.12     | 69.42  | 6.70                    | 6.20   |
|                                         | 2       | 77.41     | 69.48  | 7.93                    |        | 81.45     | 78.60 | 2.85                    |        | 80.92     | 85.81  | -4.89                   |        | 59.68     | 89.51  | -29.83                  |        | 77.58     | 75.41  | 2.17                    |        |
|                                         | 3       | 85.88     | 73.53  | 12.35                   |        | 81.97     | 78.71 | 3.26                    |        | 81.65     | 86.42  | -4.77                   |        | 59.06     | 92.03  | -32.97                  |        | 83.53     | 73.79  | 9.74                    |        |
| Mean                                    |         | 84.84     | 74.30  | 10.54                   | 10.54  | 80.51     | 76.69 | 3.82                    | 3.82   | 87.36     | 89.63  | -2.27                   | -2.27  | 86.19     | 83.08  | 3.11                    | 3.11   | 91.11     | 76.97  | 14.14                   | 14.14  |
| SE                                      |         | 1.81      | 2.05   | 3.12                    | 4.99   | 2.50      | 2.41  | 2.99                    | 5.39   | 2.66      | 2.14   | 3.94                    | 6.71   | 3.95      | 2.71   | 6.29                    | 11.39  | 3.43      | 2.45   | 3.41                    | 5.86   |

| Group 8<br>Cmpd D1 (10 µg/kg)<br>ip_QD |         | Force (g) |       | Paw Wt Distribution (g) |        | Force (g) |        | Paw Wt Distribution (g) |        | Force (g) |       | Paw Wt Distribution (g) |        | Force (g) |        | Paw Wt Distribution (g) |        | Force (g) |       | Paw Wt Distribution (g) |        |
|----------------------------------------|---------|-----------|-------|-------------------------|--------|-----------|--------|-------------------------|--------|-----------|-------|-------------------------|--------|-----------|--------|-------------------------|--------|-----------|-------|-------------------------|--------|
| Animal #                               | Trial # | Left      | Right | Per Trial               | Mean   | Left      | Right  | Per Trial               | Mean   | Left      | Right | Per Trial               | Mean   | Left      | Right  | Per Trial               | Mean   | Left      | Right | Per Trial               | Mean   |
| Animal 1                               | 1       | 97.56     | 87.32 | 10.24                   | 11.20  | 93.89     | 82.74  | 11.15                   | 12.44  | 72.69     | 82.52 | -9.83                   | -9.21  | 90.37     | 100.17 | -9.80                   | -12.08 | 89.00     | 90.00 | -1.00                   | -5.29  |
|                                        | 2       | 97.30     | 85.53 | 11.77                   |        | 95.23     | 81.64  | 13.59                   |        | 73.68     | 82.92 | -9.24                   |        | 87.56     | 99.57  | -12.01                  |        | 87.84     | 90.45 | -2.61                   |        |
|                                        | 3       | 99.76     | 88.18 | 11.58                   |        | 94.56     | 81.99  | 12.57                   |        | 75.20     | 83.75 | -8.55                   |        | 84.32     | 98.75  | -14.43                  |        | 81.93     | 94.19 | -12.26                  |        |
| 2                                      | 1       | 82.33     | 60.26 | 22.07                   | 32.48  | 64.32     | 109.15 | -44.83                  | -41.75 | 93.99     | 80.32 | 13.67                   | 10.43  | 105.23    | 95.80  | 9.43                    | 12.87  | 96.69     | 65.10 | 31.59                   | 33.85  |
|                                        | 2       | 83.62     | 57.71 | 25.91                   |        | 62.37     | 101.08 | -38.71                  |        | 93.32     | 79.84 | 13.48                   |        | 95.80     | 85.56  | 10.24                   |        | 102.38    | 65.14 | 37.24                   |        |
|                                        | 3       | 97.86     | 58.59 | 39.27                   |        | 61.19     | 102.89 | -41.70                  |        | 86.76     | 82.61 | 4.15                    |        | 97.01     | 78.08  | 18.93                   |        | 94.44     | 61.71 | 32.73                   |        |
| 3                                      | 1       | 96.15     | 74.85 | 21.30                   | 18.59  | 102.77    | 100.39 | 2.38                    | 2.28   | 61.64     | 74.45 | -12.81                  | -21.78 | 93.09     | 89.52  | 3.57                    | 5.48   | 110.02    | 80.41 | 29.61                   | 24.00  |
|                                        | 2       | 94.97     | 77.08 | 17.89                   |        | 102.98    | 100.47 | 2.51                    |        | 59.07     | 87.57 | -28.50                  |        | 94.54     | 87.85  | 6.69                    |        | 108.83    | 83.57 | 25.26                   |        |
|                                        | 3       | 94.94     | 78.36 | 16.58                   |        | 101.42    | 99.47  | 1.95                    |        | 62.97     | 87.01 | -24.04                  |        | 94.54     | 88.35  | 6.19                    |        | 107.32    | 86.59 | 20.73                   |        |
| 4                                      | 1       | 105.48    | 70.17 | 35.31                   | 35.10  | 83.91     | 82.75  | 1.16                    | -2.23  | 96.41     | 77.29 | 19.12                   | 21.85  | 89.20     | 69.21  | 19.99                   | 20.97  | 110.71    | 78.98 | 31.73                   | 31.62  |
|                                        | 2       | 104.22    | 68.35 | 35.87                   |        | 83.20     | 86.70  | -3.50                   |        | 101.77    | 78.94 | 22.83                   |        | 92.95     | 71.35  | 21.60                   |        | 110.93    | 79.56 | 31.37                   |        |
|                                        | 3       | 103.24    | 69.13 | 34.11                   |        | 83.25     | 87.60  | -4.35                   |        | 101.71    | 78.12 | 23.59                   |        | 92.59     | 71.26  | 21.33                   |        | 111.81    | 80.04 | 31.77                   |        |
| 5                                      | 1       | 93.42     | 64.87 | 28.55                   | 26.84  | 85.00     | 87.19  | -2.19                   | -1.68  | 72.37     | 96.09 | -23.72                  | -11.71 | 88.50     | 72.72  | 15.78                   | 28.02  | 76.93     | 71.63 | 5.30                    | 8.00   |
|                                        | 2       | 94.65     | 68.16 | 26.49                   |        | 86.51     | 88.64  | -2.13                   |        | 87.34     | 94.47 | -7.13                   |        | 102.40    | 74.98  | 27.42                   |        | 84.27     | 76.84 | 7.43                    |        |
|                                        | 3       | 90.25     | 64.78 | 25.47                   |        | 86.71     | 88.43  | -0.72                   |        | 94.31     | 98.59 | -4.28                   |        | 109.87    | 69.00  | 40.87                   |        | 92.06     | 80.79 | 11.27                   |        |
| 6                                      | 1       | 92.23     | 87.42 | 4.81                    | 5.34   | 116.09    | 74.84  | 41.25                   | 39.61  | 98.54     | 63.39 | 35.15                   | 34.08  | 110.80    | 71.69  | 39.11                   | 40.30  | 77.92     | 83.96 | -6.04                   | -5.11  |
|                                        | 2       | 94.01     | 88.48 | 5.53                    |        | 114.92    | 76.09  | 38.83                   |        | 97.70     | 63.26 | 34.44                   |        | 111.81    | 71.39  | 40.42                   |        | 79.11     | 84.14 | -5.03                   |        |
|                                        | 3       | 94.32     | 88.65 | 5.67                    |        | 113.79    | 75.03  | 38.76                   |        | 97.97     | 65.33 | 32.64                   |        | 112.30    | 70.93  | 41.37                   |        | 86.32     | 90.57 | -4.25                   |        |
| 7                                      | 1       | 71.50     | 80.56 | -9.06                   | -11.93 | 75.68     | 102.72 | -27.04                  | -25.06 | 90.80     | 60.72 | 30.08                   | 29.96  | 70.64     | 89.98  | -19.34                  | -21.18 | 73.31     | 89.33 | -16.02                  | -15.13 |
|                                        | 2       | 73.23     | 82.48 | -9.25                   |        | 74.57     | 100.50 | -25.93                  |        | 91.64     | 62.65 | 28.99                   |        | 69.82     | 88.52  | -18.70                  |        | 73.40     | 87.97 | -14.57                  |        |
|                                        | 3       | 71.05     | 88.53 | -17.48                  |        | 78.48     | 100.70 | -22.22                  |        | 93.52     | 62.70 | 30.82                   |        | 70.63     | 96.13  | -25.50                  |        | 75.33     | 90.12 | -14.79                  |        |
| 8                                      | 1       | 96.81     | 65.30 | 31.51                   | 16.15  | 83.13     | 89.85  | -6.72                   | -11.76 | 85.96     | 80.06 | 5.92                    | 12.77  | 92.53     | 59.18  | 33.35                   | 33.11  | 93.10     | 61.74 | 31.36                   | 35.51  |
|                                        | 2       | 79.43     | 73.51 | 5.92                    |        | 84.12     | 90.37  | -6.25                   |        | 98.03     | 79.81 | 18.22                   |        | 95.61     | 61.96  | 33.65                   |        | 95.61     | 57.55 | 38.06                   |        |
|                                        | 3       | 89.42     | 68.39 | 21.03                   |        | 71.94     | 94.25  | -22.31                  |        | 98.57     | 84.45 | 14.12                   |        | 95.21     | 61.35  | 33.86                   |        | 95.46     | 58.35 | 37.11                   |        |
| Mean                                   |         | 91.58     | 74.86 | 16.72                   | 16.72  | 87.54     | 91.06  | -3.52                   | -3.52  | 86.92     | 78.62 | 8.30                    | 8.30   | 93.57     | 80.14  | 13.44                   | 13.44  | 92.28     | 78.85 | 13.43                   | 13.43  |
| SE                                     |         | 1.98      | 2.14  | 3.13                    | 5.47   | 3.20      | 2.02   | 4.79                    | 8.61   | 2.73      | 2.22  | 4.12                    | 7.26   | 2.44      | 2.65   | 4.32                    | 7.67   | 2.65      | 2.84  | 4.00                    | 7.18   |

| Group 9<br>Cmpd E1 (50 mg/kg)<br>po_QD |         | Force (g) |       | Paw Wt Distribution (g) |  | Force (g) |  | Paw Wt Distribution (g) |  | Force (g) |  | Paw Wt Distribution (g) |  | Force (g) |  | Paw Wt Distribution (g) |  | Force (g) |  | Paw Wt Distribution (g) |  |
|----------------------------------------|---------|-----------|-------|-------------------------|--|-----------|--|-------------------------|--|-----------|--|-------------------------|--|-----------|--|-------------------------|--|-----------|--|-------------------------|--|
| Animal #                               | Trial # | Left      | Right |                         |  |           |  |                         |  |           |  |                         |  |           |  |                         |  |           |  |                         |  |

| Group 10<br>Cmpd F1 (50 mg/kg)<br>po, QD | Trial # | Force (g) |        | Paw Wt Distribution (g) |        | Force (g) |       | Paw Wt Distribution (g) |        | Force (g) |       | Paw Wt Distribution (g) |        | Force (g) |       | Paw Wt Distribution (g) |       | Force (g) |        | Paw Wt Distribution (g) |       |        |        |           |        |
|------------------------------------------|---------|-----------|--------|-------------------------|--------|-----------|-------|-------------------------|--------|-----------|-------|-------------------------|--------|-----------|-------|-------------------------|-------|-----------|--------|-------------------------|-------|--------|--------|-----------|--------|
|                                          |         | Left      | Right  | Per Trial               | Mean   | Left      | Right | Per Trial               | Mean   | Left      | Right | Per Trial               | Mean   | Left      | Right | Per Trial               | Mean  | Left      | Right  | Per Trial               | Mean  | Left   | Right  | Per Trial | Mean   |
|                                          |         | Animal 1  | 1      | 88.49                   | 94.01  | -5.52     |       | 95.27                   | 80.24  | 15.03     |       | 84.82                   | 98.20  | -13.38    |       | 115.59                  | 63.81 | 51.78     |        | 94.08                   | 79.75 | 14.33  |        | 94.08     | 79.75  |
|                                          | 2       | 89.51     | 93.67  | -4.16                   | -6.36  | 94.64     | 85.62 | 9.02                    | 9.59   | 80.64     | 94.40 | -3.76                   | -9.76  | 114.41    | 61.80 | 52.61                   |       | 91.65     | 83.55  | 8.10                    |       | 91.65  | 83.55  | 8.10      | 10.17  |
|                                          | 3       | 89.03     | 98.44  | -9.41                   |        | 93.17     | 88.44 | 4.73                    |        | 95.92     | 98.07 | -12.15                  |        | 114.13    | 74.67 | 39.46                   |       | 91.85     | 83.86  | 8.10                    |       | 91.85  | 83.86  | 8.10      |        |
|                                          | 1       | 106.15    | 75.73  | 30.42                   |        | 103.50    | 76.12 | 27.38                   |        | 111.14    | 88.13 | 23.01                   |        | 99.72     | 85.80 | 13.92                   |       | 97.01     | 73.02  | 23.99                   |       | 97.01  | 73.02  | 23.99     |        |
|                                          | 2       | 110.36    | 74.66  | 35.70                   | 32.94  | 104.04    | 75.04 | 29.00                   | 32.23  | 114.45    | 78.03 | 36.42                   | 28.80  | 90.63     | 78.50 | 12.13                   | 12.45 | 89.09     | 75.68  | 13.41                   |       | 89.09  | 75.68  | 13.41     | 20.87  |
|                                          | 3       | 110.40    | 77.71  | 32.69                   |        | 107.65    | 67.35 | 40.30                   |        | 105.61    | 78.64 | 26.97                   |        | 94.99     | 83.68 | 11.31                   |       | 93.96     | 68.74  | 25.22                   |       | 93.96  | 68.74  | 25.22     |        |
|                                          | 1       | 84.70     | 74.15  | 10.55                   |        | 114.05    | 75.82 | 38.23                   |        | 75.63     | 88.21 | -12.58                  |        | 95.89     | 77.12 | 18.77                   |       | 104.16    | 87.48  | 16.68                   |       | 104.16 | 87.48  | 16.68     |        |
|                                          | 2       | 88.16     | 73.28  | 14.88                   | 14.33  | 113.13    | 77.99 | 35.14                   | 33.91  | 73.15     | 91.02 | -17.87                  | -15.43 | 104.47    | 78.38 | 26.09                   | 24.39 | 105.40    | 86.12  | 19.28                   |       | 105.40 | 86.12  | 19.28     | 19.52  |
|                                          | 3       | 91.24     | 73.69  | 17.55                   |        | 108.51    | 80.14 | 28.37                   |        | 72.48     | 88.33 | -15.85                  |        | 106.42    | 78.11 | 28.31                   |       | 106.05    | 83.44  | 22.61                   |       | 106.05 | 83.44  | 22.61     |        |
|                                          | 1       | 104.18    | 75.16  | 29.02                   |        | 84.79     | 98.24 | -13.45                  |        | 101.26    | 76.02 | 25.24                   |        | 88.49     | 97.25 | -8.76                   |       | 85.91     | 104.65 | -18.74                  |       | 85.91  | 104.65 | -18.74    |        |
|                                          | 2       | 110.76    | 68.12  | 42.64                   | 41.31  | 84.72     | 98.33 | -13.61                  | -13.70 | 93.16     | 82.62 | 10.54                   | 14.40  | 87.17     | 96.87 | -9.70                   | -9.67 | 90.11     | 97.10  | -6.99                   |       | 90.11  | 97.10  | -6.99     | -15.42 |
|                                          | 3       | 117.03    | 64.77  | 52.26                   |        | 85.56     | 99.60 | -14.04                  |        | 95.25     | 87.84 | 7.41                    |        | 87.89     | 98.45 | -10.56                  |       | 85.32     | 105.85 | -20.53                  |       | 85.32  | 105.85 | -20.53    |        |
|                                          | 1       | 89.40     | 79.48  | 9.92                    |        | 102.72    | 62.88 | 39.84                   |        | 79.52     | 72.23 | 7.29                    |        | 92.49     | 80.79 | 11.70                   |       | 90.02     | 67.19  | 22.83                   |       | 90.02  | 67.19  | 22.83     |        |
|                                          | 2       | 91.82     | 73.86  | 17.96                   | 14.91  | 106.38    | 67.38 | 39.00                   | 38.08  | 84.92     | 72.26 | 12.66                   | 11.52  | 89.14     | 76.57 | 12.57                   | 9.03  | 79.91     | 68.51  | 11.40                   |       | 79.91  | 68.51  | 11.40     | 14.74  |
|                                          | 3       | 93.09     | 76.23  | 16.86                   |        | 101.61    | 66.22 | 35.39                   |        | 89.00     | 74.39 | 14.61                   |        | 90.23     | 87.42 | 2.81                    |       | 89.58     | 79.58  | 10.00                   |       | 89.58  | 79.58  | 10.00     |        |
|                                          | 1       | 112.23    | 87.64  | 24.59                   |        | 99.99     | 90.98 | 9.01                    |        | 98.21     | 89.60 | 8.61                    |        | 86.18     | 75.01 | 11.17                   |       | 97.04     | 78.68  | 18.36                   |       | 97.04  | 78.68  | 18.36     |        |
|                                          | 2       | 103.01    | 66.96  | 36.05                   | 29.42  | 94.04     | 84.24 | 9.80                    | 11.45  | 98.20     | 92.12 | 6.08                    | 8.30   | 96.77     | 68.82 | 27.95                   | 22.43 | 96.59     | 77.37  | 19.22                   |       | 96.59  | 77.37  | 19.22     | 19.45  |
|                                          | 3       | 101.89    | 74.26  | 27.63                   |        | 99.96     | 84.42 | 15.54                   |        | 99.55     | 92.27 | 7.28                    |        | 100.79    | 72.61 | 28.18                   |       | 99.21     | 78.44  | 20.77                   |       | 99.21  | 78.44  | 20.77     |        |
|                                          | 1       | 81.06     | 101.06 | -20.00                  |        | 80.03     | 77.35 | 2.68                    |        | 85.60     | 82.36 | 3.24                    |        | 93.52     | 91.27 | 2.25                    |       | 75.48     | 75.04  | 0.44                    |       | 75.48  | 75.04  | 0.44      |        |
|                                          | 2       | 83.48     | 96.73  | -13.25                  | -15.31 | 70.99     | 88.12 | 17.13                   | 3.86   | 86.04     | 74.64 | 11.40                   |        | 94.96     | 71.05 | 23.91                   |       | 71.43     | 74.24  | -2.81                   |       | 71.43  | 74.24  | -2.81     |        |
|                                          | 3       | 86.16     | 99.85  | -13.69                  |        | 80.43     | 74.39 | 6.04                    |        | 80.17     | 79.63 | 0.54                    |        | 101.51    | 65.81 | 35.70                   |       | 72.20     | 76.48  | -4.28                   |       | 72.20  | 76.48  | -4.28     | -2.22  |
|                                          | 1       | 73.70     | 86.91  | -13.21                  |        | 67.96     | 70.32 | -2.36                   |        | 92.76     | 89.65 | 3.11                    |        | 119.90    | 70.02 | 49.88                   |       | 78.54     | 67.33  | 11.21                   |       | 78.54  | 67.33  | 11.21     |        |
|                                          | 2       | 75.01     | 85.02  | -10.01                  | -10.97 | 76.27     | 77.39 | -1.12                   | -4.27  | 95.24     | 94.16 | 1.08                    | 3.53   | 113.02    | 64.57 | 48.45                   | 35.98 | 77.84     | 67.54  | 10.30                   |       | 77.84  | 67.54  | 10.30     | 7.85   |
|                                          | 3       | 75.85     | 85.53  | -9.68                   |        | 75.02     | 84.34 | -9.32                   |        | 93.34     | 86.93 | 6.41                    |        | 90.16     | 80.55 | 9.61                    |       | 78.68     | 76.65  | 2.03                    |       | 78.68  | 76.65  | 2.03      |        |
| Mean                                     |         | 94.03     | 81.50  | 12.53                   | 12.53  | 93.52     | 79.62 | 13.89                   | 13.89  | 91.12     | 85.32 | 5.80                    | 5.80   | 98.69     | 78.29 | 20.40                   | 20.40 | 89.22     | 79.85  | 9.37                    |       | 89.22  | 79.85  | 9.37      | 9.37   |
| SE                                       |         | 2.61      | 2.23   | 4.29                    | 7.59   | 2.76      | 2.12  | 3.78                    | 6.73   | 2.26      | 1.63  | 2.85                    | 4.89   | 2.11      | 2.15  | 3.90                    | 6.15  | 2.07      | 2.17   | 2.61                    |       | 2.07   | 2.17   | 2.61      | 4.47   |

Table 73. Individual animal data for MMT/MCLT Trial 1 Day 21 data

| Group 1<br>Vehicle (Saline)<br>ip, QD | Trial # | Day 21 (Pre tx) |        |                         |       | Day 21 (1 hr) |       |                         |       | Day 21 (3 hr) |        |                         |        | Day 21 (5 hr) |        |                         |        | Day 21 (24 hr) |        |                         |       |
|---------------------------------------|---------|-----------------|--------|-------------------------|-------|---------------|-------|-------------------------|-------|---------------|--------|-------------------------|--------|---------------|--------|-------------------------|--------|----------------|--------|-------------------------|-------|
|                                       |         | Force (g)       |        | Paw Wt Distribution (g) |       | Force (g)     |       | Paw Wt Distribution (g) |       | Force (g)     |        | Paw Wt Distribution (g) |        | Force (g)     |        | Paw Wt Distribution (g) |        | Force (g)      |        | Paw Wt Distribution (g) |       |
|                                       |         | Left            | Right  | Per Trial               | Mean  | Left          | Right | Per Trial               | Mean  | Left          | Right  | Per Trial               | Mean   | Left          | Right  | Per Trial               | Mean   | Left           | Right  | Per Trial               | Mean  |
| Animal 1                              | 1       | 106.96          | 77.99  | 28.97                   |       | 110.33        | 88.22 | 22.11                   |       | 98.06         | 89.03  | 9.03                    |        | 99.07         | 84.37  | 14.70                   |        | 107.94         | 107.74 | 0.20                    |       |
|                                       | 2       | 94.76           | 86.41  | 8.35                    | 12.95 | 112.98        | 86.57 | 26.41                   | 22.98 | 103.68        | 86.78  | 16.90                   | 13.90  | 96.05         | 88.71  | 7.34                    | 9.13   | 90.17          | 89.11  | 1.06                    | 1.53  |
|                                       | 3       | 98.37           | 96.83  | 1.54                    |       | 109.22        | 88.81 | 20.41                   |       | 112.70        | 96.94  | 15.76                   |        | 96.02         | 90.67  | 5.35                    |        | 91.79          | 88.47  | 3.32                    |       |
|                                       | 1       | 115.38          | 85.60  | 29.78                   |       | 105.59        | 86.24 | 19.35                   |       | 105.48        | 74.49  | 30.99                   |        | 77.80         | 85.94  | -8.14                   |        | 97.22          | 83.75  | 13.47                   |       |
|                                       | 2       | 122.94          | 84.22  | 38.72                   | 28.79 | 104.39        | 89.41 | 14.98                   | 16.83 | 98.20         | 92.13  | 6.07                    | 20.92  | 76.36         | 85.36  | -9.00                   | -11.45 | 100.44         | 84.49  | 15.95                   | 10.85 |
|                                       | 3       | 106.31          | 88.45  | 17.86                   |       | 106.45        | 90.29 | 16.16                   |       | 105.45        | 79.74  | 25.71                   |        | 85.17         | 102.38 | -17.21                  |        | 96.34          | 93.21  | 3.13                    |       |
|                                       | 1       | 93.80           | 82.33  | 11.47                   |       | 94.83         | 87.80 | 7.03                    |       | 85.61         | 97.16  | -11.55                  |        | 94.35         | 104.27 | -9.92                   |        | 93.89          | 71.61  | 22.28                   |       |
|                                       | 2       | 101.92          | 84.59  | 17.33                   | 10.63 | 102.20        | 80.85 | 21.35                   | 11.87 | 90.80         | 104.50 | -13.70                  | -14.50 | 101.40        | 96.90  | 4.50                    | -3.71  | 111.10         | 68.99  | 42.11                   | 32.91 |
|                                       | 3       | 98.26           | 95.18  | 3.08                    |       | 98.30         | 91.08 | 7.22                    |       | 86.69         | 104.94 | -18.25                  |        | 88.97         | 94.67  | -5.70                   |        | 104.51         | 70.17  | 34.34                   |       |
|                                       | 1       | 104.56          | 108.72 | -4.16                   |       | 99.76         | 90.57 | 9.19                    |       | 112.77        | 75.36  | 37.41                   |        | 133.73        | 83.66  | 50.07                   |        | 96.30          | 95.43  | 0.87                    |       |
|                                       | 2       | 118.26          | 111.08 | 7.18                    | 2.29  | 103.08        | 90.57 | 12.51                   | 13.11 | 110.88        | 73.50  | 37.38                   | 37.99  | 136.00        | 79.46  | 56.54                   | 53.76  | 98.11          | 93.09  | 5.02                    | 8.13  |
|                                       | 3       | 117.29          | 113.43 | 3.86                    |       | 107.62        | 89.99 | 17.63                   |       | 112.35        | 73.18  | 39.17                   |        | 133.60        | 78.92  | 54.68                   |        | 106.76         | 88.26  | 18.50                   |       |
|                                       | 1       | 110.15          | 85.96  | 24.19                   |       | 104.09        | 92.40 | 11.69                   |       | 87.43         | 79.05  | 8.38                    |        | 83.22         | 83.38  | -0.16                   |        | 107.62         | 91.39  | 16.23                   |       |
|                                       | 2       | 108.36          | 85.79  | 22.57                   | 22.78 | 104.70        | 94.73 | 9.97                    | 10.43 | 91.49         | 82.04  | 9.45                    | 8.01   | 80.97         | 84.29  | -3.32                   | -4.30  | 107.07         | 92.75  | 14.32                   | 14.57 |
|                                       | 3       | 107.63          | 86.06  | 21.57                   |       | 107.93        | 98.30 | 9.63                    |       | 91.36         | 85.15  | 6.21                    |        | 79.79         | 89.21  | -9.42                   |        | 107.03         | 93.88  | 13.15                   |       |
|                                       | 1       | 94.48           | 70.94  | 23.54                   |       | 90.62         | 74.13 | 16.49                   |       | 104.46        | 74.66  | 29.80                   |        | 95.69         | 55.54  | 40.15                   |        | 85.28          | 80.56  | 4.72                    |       |
|                                       | 2       | 100.00          | 57.74  | 42.26                   | 38.33 | 93.02         | 80.72 | 12.30                   | 14.39 | 105.40        | 76.38  | 29.02                   | 28.92  | 104.57        | 60.00  | 44.57                   | 44.47  | 94.08          | 82.54  | 11.54                   | 5.52  |
|                                       | 3       | 105.32          | 56.14  | 49.18                   |       | 90.68         | 76.29 | 14.39                   |       | 104.52        | 76.59  | 27.93                   |        | 107.69        | 59.20  | 48.69                   |        | 93.77          | 93.48  | 0.29                    |       |
|                                       | 1       | 103.30          | 89.47  | 13.83                   |       | 122.85        | 78.07 | 44.78                   |       | 111.87        | 77.56  | 34.31                   |        | 91.25         | 70.37  | 20.88                   |        | 105.17         | 88.59  | 16.58                   |       |
|                                       | 2       | 102.77          | 88.03  | 14.74                   | 14.23 | 123.64        | 78.08 | 45.56                   | 44.92 | 110.29        | 84.32  | 25.97                   | 27.73  | 80.34         | 74.90  | 5.44                    | 13.06  | 103.76         | 90.63  | 13.13                   | 13.50 |
|                                       | 3       | 102.53          | 88.40  | 14.13                   |       | 123.66        | 79.25 | 44.41                   |       | 108.10        | 85.20  | 22.90                   |        | 87.09         | 74.23  | 12.86                   |        | 105.37         | 94.59  | 10.78                   |       |
|                                       | 1       | 94.78           | 83.31  | 11.47                   |       | 114.70        | 87.35 | 27.35                   |       | 101.31        | 76.88  | 24.43                   |        | 1             |        |                         |        |                |        |                         |       |

| Group 3<br>Cmpd A1 (0.3 mg/kg<br>ip_QD) | Trial # | Force (g) |        | Paw Wt Distribution (g) |        | Force (g) |        | Paw Wt Distribution (g) |       | Force (g) |        | Paw Wt Distribution (g) |        | Force (g) |       | Paw Wt Distribution (g) |             | Force (g) |        | Paw Wt Distribution (g) |               |
|-----------------------------------------|---------|-----------|--------|-------------------------|--------|-----------|--------|-------------------------|-------|-----------|--------|-------------------------|--------|-----------|-------|-------------------------|-------------|-----------|--------|-------------------------|---------------|
|                                         |         | Left      | Right  | Per Trial               | Mean   | Left      | Right  | Per Trial               | Mean  | Left      | Right  | Per Trial               | Mean   | Left      | Right | Per Trial               | Mean        | Left      | Right  | Per Trial               | Mean          |
|                                         |         | 1         | 90.34  | 73.43                   | 16.91  |           | 80.43  | 78.72                   | 1.71  |           | 88.20  | 64.01                   | 24.19  |           | 95.99 | 67.40                   | 28.59       |           | 103.14 | 82.06                   | 51.08         |
| 2                                       | 85.33   | 74.81     | 10.52  | <b>12.73</b>            | 85.61  | 77.16     | 8.45   | <b>5.27</b>             | 68.59 | 61.82     | 6.77   |                         | 99.96  | 45.09     | 54.87 |                         | 101.71      | 48.29     | 53.42  | <b>48.47</b>            |               |
| 3                                       | 86.37   | 75.61     | 10.76  |                         | 84.91  | 79.27     | 5.64   |                         | 95.88 | 50.45     | 45.43  |                         | 98.39  | 39.35     | 59.04 |                         | 100.11      | 59.20     | 40.91  |                         |               |
| 2                                       | 1       | 80.93     | 74.97  | 5.96                    |        | 78.82     | 101.30 | -22.48                  |       | 70.06     | 100.30 | -30.24                  |        | 93.63     | 73.46 | 20.17                   |             | 69.26     | 93.04  | -23.78                  |               |
| 2                                       | 83.35   | 75.76     | 7.59   | <b>7.74</b>             | 79.59  | 93.71     | -14.12 | <b>-17.96</b>           | 73.43 | 96.32     | -22.89 |                         | 103.04 | 75.99     | 27.05 | <b>19.74</b>            |             | 69.70     | 92.10  | -22.40                  | <b>-21.95</b> |
| 3                                       | 83.83   | 74.16     | 9.67   |                         | 67.73  | 85.01     | -17.28 |                         | 77.35 | 96.89     | -19.54 |                         | 93.92  | 81.91     | 12.01 |                         | 59.20       | 78.87     | -19.67 |                         |               |
| 3                                       | 1       | 93.23     | 82.93  | 10.30                   |        | 106.74    | 58.85  | 47.89                   |       | 71.89     | 87.90  | -16.01                  |        | 96.83     | 84.44 | 12.39                   |             | 69.59     | 74.81  | -5.22                   |               |
| 2                                       | 95.58   | 75.40     | 6.96   | <b>8.17</b>             | 107.08 | 57.15     | 50.91  |                         | 97.06 | 95.24     | -19.45 |                         | 97.06  | 92.17     | 4.91  |                         | 69.37       | 74.92     | -5.55  |                         |               |
| 3                                       | 92.68   | 85.43     | 7.25   |                         | 110.84 | 62.30     | 48.54  | <b>49.00</b>            | 82.18 | 92.09     | -9.91  | <b>-15.12</b>           |        | 97.27     | 92.95 | 4.32                    | <b>7.21</b> | 69.48     | 74.28  | -4.80                   | <b>-5.19</b>  |
| 4                                       | 1       | 99.37     | 63.98  | 35.39                   |        | 73.59     | 54.13  | 19.46                   |       | 63.29     | 70.86  | -7.57                   |        | 90.51     | 85.35 | 5.16                    |             | 69.39     | 102.30 | -32.91                  |               |
| 2                                       | 104.62  | 62.04     | 42.58  | <b>26.16</b>            | 91.68  | 43.59     | 48.09  | <b>31.02</b>            | 66.61 | 70.24     | -3.63  | <b>-5.24</b>            |        | 94.35     | 83.56 | 10.79                   | <b>8.34</b> | 85.14     | 97.62  | -12.48                  | <b>-18.89</b> |
| 3                                       | 80.04   | 79.53     | 0.51   |                         | 80.41  | 54.91     | 25.50  |                         | 76.48 | 80.99     | -4.51  |                         | 92.17  | 83.09     | 9.08  |                         | 78.75       | 90.02     | -11.27 |                         |               |
| 5                                       | 1       | 88.54     | 89.78  | -1.24                   |        | 92.52     | 79.17  | 13.35                   |       | 84.14     | 97.07  | -12.93                  |        | 79.10     | 73.37 | 5.73                    |             | 102.46    | 82.15  | 20.31                   |               |
| 2                                       | 89.16   | 122.89    | -33.73 | <b>-20.63</b>           | 113.25 | 79.04     | 34.21  | <b>21.91</b>            | 86.81 | 96.54     | -9.73  | <b>-9.77</b>            |        | 82.26     | 79.35 | 2.91                    | <b>5.10</b> | 104.39    | 83.72  | 20.67                   | <b>19.72</b>  |
| 3                                       | 89.05   | 115.98    | -26.93 |                         | 105.30 | 87.14     | 18.16  |                         | 84.52 | 91.18     | -6.66  |                         | 75.28  | 68.61     | 6.67  |                         | 106.82      | 88.63     | 18.19  |                         |               |
| 6                                       | 1       | 74.80     | 59.55  | 15.25                   |        | 95.01     | 71.60  | 23.41                   |       | 80.63     | 64.80  | 15.83                   |        | 89.53     | 88.01 | 1.52                    |             | 84.14     | 64.79  | 19.35                   |               |
| 2                                       | 78.30   | 64.27     | 14.03  | <b>14.10</b>            | 93.36  | 68.68     | 24.68  | <b>23.89</b>            | 73.08 | 68.53     | 4.55   | <b>8.79</b>             |        | 91.16     | 89.50 | 1.66                    | <b>0.74</b> | 82.19     | 72.15  | 10.04                   | <b>12.84</b>  |
| 3                                       | 81.86   | 68.84     | 13.02  |                         | 92.22  | 68.65     | 23.57  |                         | 76.50 | 70.52     | 5.98   |                         | 88.29  | 89.25     | -0.96 |                         | 81.49       | 72.35     | 9.14   |                         |               |
| 7                                       | 1       | 97.01     | 72.82  | 24.19                   |        | 82.03     | 93.87  | -11.84                  |       | 80.94     | 91.54  | -10.60                  |        | 87.44     | 83.89 | 3.55                    |             | 116.02    | 70.56  | 45.46                   |               |
| 2                                       | 99.15   | 72.07     | 27.08  | <b>27.58</b>            | 82.27  | 97.43     | -15.16 | <b>-12.59</b>           | 66.45 | 110.26    | -43.81 | <b>-33.18</b>           |        | 87.42     | 78.73 | 8.69                    | <b>7.23</b> | 117.15    | 70.55  | 46.60                   | <b>45.27</b>  |
| 3                                       | 103.36  | 71.89     | 31.47  |                         | 93.28  | 104.04    | -10.76 |                         | 67.73 | 112.85    | -45.12 |                         | 92.99  | 83.54     | 9.45  |                         | 117.90      | 74.14     | 43.76  |                         |               |
| 8                                       | 1       | 56.19     | 84.30  | -28.11                  |        | 53.94     | 98.11  | -44.17                  |       | 92.32     | 79.47  | 12.85                   |        | 60.39     | 56.98 | 3.41                    |             | 73.29     | 64.51  | 8.78                    |               |
| 2                                       | 62.71   | 78.86     | -16.15 | <b>-21.52</b>           | 53.14  | 101.79    | -48.65 | <b>-38.42</b>           | 92.18 | 77.23     | 14.95  | <b>12.79</b>            |        | 65.30     | 59.81 | 5.49                    | <b>5.25</b> | 73.84     | 65.28  | 8.56                    | <b>14.12</b>  |
| 3                                       | 61.11   | 81.41     | -20.30 |                         | 64.67  | 87.10     | -22.43 |                         | 90.96 | 80.39     | 10.57  |                         | 68.22  | 61.38     | 6.84  |                         | 86.40       | 61.38     | 25.02  |                         |               |
| Mean                                    |         | 85.70     | 78.91  | 6.79                    | 6.79   | 86.21     | 78.45  | 7.76                    | 7.76  | 78.58     | 83.65  | -5.06                   | -5.06  | 88.36     | 75.72 | 12.64                   | 12.64       | 87.12     | 75.32  | 11.80                   | 11.80         |
| SE                                      |         | 2.58      | 3.03   | 4.06                    | 6.62   | 3.34      | 3.52   | 5.85                    | 10.28 | 1.91      | 3.30   | 4.24                    | 6.97   | 2.29      | 2.94  | 3.17                    | 5.34        | 3.66      | 2.84   | 5.27                    | 9.36          |

| Group 4<br>Cmpd A2 (0.6 mg/kg<br>ip_QD) | Trial # | Force (g) |        | Paw Wt Distribution (g) |        | Force (g) |        | Paw Wt Distribution (g) |        | Force (g) |        | Paw Wt Distribution (g) |        | Force (g) |        | Paw Wt Distribution (g) |               | Force (g) |        | Paw Wt Distribution (g) |               |
|-----------------------------------------|---------|-----------|--------|-------------------------|--------|-----------|--------|-------------------------|--------|-----------|--------|-------------------------|--------|-----------|--------|-------------------------|---------------|-----------|--------|-------------------------|---------------|
|                                         |         | Left      | Right  | Per Trial               | Mean   | Left      | Right  | Per Trial               | Mean   | Left      | Right  | Per Trial               | Mean   | Left      | Right  | Per Trial               | Mean          | Left      | Right  | Per Trial               | Mean          |
|                                         |         | 1         | 99.46  | 65.80                   | 33.66  |           | 97.60  | 64.94                   | 32.66  |           | 94.99  | 78.47                   | 16.52  |           | 72.72  | 88.20                   | -15.48        |           | 67.67  | 94.04                   | -26.37        |
| 2                                       | 86.88   | 75.40     | 11.48  | <b>19.45</b>            | 97.08  | 63.67     | 33.41  |                         | 95.94  | 77.22     | 18.72  |                         | 68.36  | 86.38     | -20.02 |                         | 71.89         | 98.68     | -26.79 |                         |               |
| 3                                       | 86.34   | 73.12     | 13.22  |                         | 102.25 | 63.35     | 38.90  | <b>34.99</b>            | 85.18  | 76.48     | 8.70   | <b>14.65</b>            |        | 67.35     | 92.33  | -24.98                  | <b>-20.16</b> | 65.96     | 95.41  | -29.45                  | <b>-27.54</b> |
| 2                                       | 1       | 88.98     | 61.31  | 27.67                   |        | 67.88     | 90.66  | -22.78                  |        | 82.81     | 69.01  | 13.80                   |        | 86.73     | 71.49  | 15.24                   |               | 63.62     | 98.22  | -34.60                  |               |
| 2                                       | 80.73   | 74.44     | 6.29   | <b>12.94</b>            | 65.53  | 98.32     | -32.79 | <b>-29.28</b>           | 90.63  | 82.63     | 7.80   | <b>6.12</b>             |        | 83.63     | 82.21  | 1.42                    | <b>17.28</b>  | 61.33     | 69.23  | -7.90                   | <b>-17.78</b> |
| 3                                       | 80.75   | 75.90     | 4.85   |                         | 65.74  | 98.01     | -32.27 |                         | 81.32  | 84.56     | -3.24  |                         | 102.75 | 67.57     | 35.18  |                         | 68.89         | 79.73     | -10.84 |                         |               |
| 3                                       | 1       | 86.46     | 74.82  | 11.64                   |        | 90.97     | 68.83  | 22.14                   |        | 80.51     | 82.00  | -1.49                   |        | 101.97    | 84.43  | 17.54                   |               | 90.29     | 70.28  | 20.01                   |               |
| 2                                       | 85.36   | 71.81     | 13.55  | <b>9.73</b>             | 93.95  | 65.12     | 28.83  | <b>20.87</b>            | 80.22  | 86.36     | -6.14  | <b>-5.18</b>            |        | 102.13    | 85.68  | 16.45                   | <b>13.09</b>  | 96.22     | 75.20  | 20.94                   | <b>22.38</b>  |
| 3                                       | 87.00   | 83.01     | 3.99   |                         | 88.46  | 76.82     | 11.64  |                         | 78.39  | 86.30     | -7.91  |                         | 97.28  | 92.01     | 5.27   |                         | 101.79        | 75.60     | 26.19  |                         |               |
| 4                                       | 1       | 91.71     | 79.32  | 12.39                   |        | 98.81     | 74.56  | 24.25                   |        | 109.12    | 73.73  | 35.39                   |        | 105.85    | 68.64  | 37.21                   |               | 80.38     | 74.41  | 5.97                    |               |
| 2                                       | 99.58   | 78.41     | 21.17  | <b>17.86</b>            | 95.15  | 74.41     | 20.74  | <b>21.85</b>            | 106.82 | 72.19     | 34.63  | <b>34.46</b>            |        | 107.19    | 70.30  | 36.89                   | <b>37.35</b>  | 80.34     | 74.71  | 5.63                    | <b>5.96</b>   |
| 3                                       | 101.66  | 81.64     | 20.02  |                         | 94.24  | 73.69     | 20.55  |                         | 106.08 | 72.71     | 33.37  |                         | 109.01 | 71.07     | 37.94  |                         | 81.75         | 75.48     | 6.27   |                         |               |
| 5                                       | 1       | 98.78     | 73.60  | 25.18                   |        | 82.16     | 59.29  | 22.87                   |        | 89.11     | 65.42  | 23.69                   |        | 79.10     | 58.06  | 21.04                   |               | 106.73    | 88.62  | 18.11                   |               |
| 2                                       | 98.02   | 73.67     | 24.35  | <b>25.05</b>            | 85.13  | 57.83     | 27.30  | <b>23.44</b>            | 90.48  | 66.97     | 23.51  | <b>24.18</b>            |        | 78.63     | 59.08  | 19.55                   | <b>19.62</b>  | 76.43     | 48.94  | 27.49                   | <b>25.04</b>  |
| 3                                       | 98.41   | 72.79     | 25.62  |                         | 81.63  | 61.48     | 20.15  |                         | 91.31  | 65.96     | 25.35  |                         | 79.94  | 61.66     | 18.28  |                         | 78.23         | 48.71     | 29.52  |                         |               |
| 6                                       | 1       | 85.61     | 74.67  | 10.94                   |        | 72.45     | 41.68  | 30.77                   |        | 71.84     | 71.43  | 0.41                    |        | 80.69     | 64.16  | 16.53                   |               | 78.03     | 64.85  | 13.18                   |               |
| 2                                       | 89.95   | 70.64     | 19.31  | <b>17.77</b>            | 80.24  | 50.32     | 29.92  | <b>30.44</b>            | 78.48  | 76.78     | 1.70   | <b>-0.05</b>            |        | 85.52     | 70.16  | 15.36                   | <b>15.00</b>  | 74.14     | 63.69  | 10.45                   | <b>11.41</b>  |
| 3                                       | 89.00   | 65.93     | 23.07  |                         | 76.88  | 46.26     | 30.62  |                         | 74.48  | 76.73     | -2.25  |                         | 79.33  | 66.21     | 13.12  |                         | 74.78         | 64.17     | 10.61  |                         |               |
| 7                                       | 1       | 79.86     | 88.42  | -8.56                   |        | 67.24     | 99.62  | -32.38                  |        | 75.89     | 70.40  | 5.49                    |        | 73.24     | 68.86  | 4.38                    |               | 104.99    | 74.97  | 30.02                   |               |
| 2                                       | 70.17   | 92.38     | -22.21 | <b>-14.05</b>           | 72.79  | 96.43     | -23.64 | <b>-24.49</b>           | 80.69  | 76.35     | 4.34   | <b>4.63</b>             |        | 82.21     | 69.07  | 13.14                   | <b>5.95</b>   | 92.65     | 74.83  | 17.82                   | <b>22.24</b>  |
| 3                                       | 78.68   | 90.07     | -11.39 |                         | 76.19  | 93.65     | -17.46 |                         | 83.41  | 79.35     | 4.06   |                         | 69.38  | 69.04     | 0.34   |                         | 98.90         | 80.02     | 18.88  |                         |               |
| 8                                       | 1       | 108.47    | 63.67  | 44.80                   |        | 87.44     | 66.67  | 20.77                   |        | 52.87     | 72.11  | -19.24                  |        | 76.17     | 58.73  | 17.44                   |               | 99.64     | 62.10  | 37.54                   |               |
| 2                                       | 104.73  | 77.73     | 27.00  | <b>28.57</b>            | 89.19  | 62.56     | 26.63  | <b>23.90</b>            | 54.84  | 74.41     | -19.57 | <b>-20.59</b>           |        | 77.02     | 62.53  | 14.49                   | <b>14.19</b>  | 104.55    | 52.35  | 52.20                   | <b>46.12</b>  |
| 3                                       | 94.03   | 80.12     | 13.91  |                         | 92.03  | 67.72     | 24.31  |                         | 55.77  | 78.12     | -22.95 |                         | 77.71  | 67.07     | 10.64  |                         | 100.13        | 51.50     | 48.63  |                         |               |
| Mean                                    |         | 90.44     | 75.78  | 14.66                   | 14.66  | 84.21     | 71.50  | 12.71                   | 12.71  | 82.94     | 75.66  | 7.28                    | 7.28   | 85.16     | 72.37  | 12.79                   | 12.79         | 84.14     | 73.16  | 10.98                   | 10.98         |
| SE                                      |         | 1.90      | 1.59   | 3.00                    | 4.62   | 2.34      | 3.43   | 4.94                    | 8.81   | 3.04      | 1.23   | 3.42                    | 6.08   | 2.70      | 2.21   | 3.37                    | 5.68          | 2.99      | 3.02   | 4.82                    | 8.48          |



| Group 9<br>Cmpd E1 (50 mg/kg<br>po, QD) | Trial<br># | Force (g) |       | Paw Wt<br>Distribution (g) |        | Force (g) |        | Paw Wt<br>Distribution (g) |        | Force (g) |        | Paw Wt<br>Distribution (g) |        | Force (g) |        | Paw Wt<br>Distribution (g) |       | Force (g) |        | Paw Wt<br>Distribution (g) |       |        |        |           |       |
|-----------------------------------------|------------|-----------|-------|----------------------------|--------|-----------|--------|----------------------------|--------|-----------|--------|----------------------------|--------|-----------|--------|----------------------------|-------|-----------|--------|----------------------------|-------|--------|--------|-----------|-------|
|                                         |            | Left      | Right | Per Trial                  | Mean   | Left      | Right  | Per Trial                  | Mean   | Left      | Right  | Per Trial                  | Mean   | Left      | Right  | Per Trial                  | Mean  | Left      | Right  | Per Trial                  | Mean  | Left   | Right  | Per Trial | Mean  |
|                                         |            | Animal 1  | 1     | 111.49                     | 94.25  | 17.24     |        | 93.19                      | 117.51 | -24.32    |        | 80.80                      | 101.81 | -21.01    |        | 99.64                      | 82.33 | 17.31     |        | 103.86                     | 77.04 | 26.82  |        | 102.70    | 78.81 |
|                                         | 2          | 111.26    | 97.25 | 14.01                      |        | 94.73     | 118.90 | -24.17                     |        | 81.27     | 96.37  | -15.10                     |        | 105.93    | 89.83  | 16.10                      |       | 102.70    | 78.81  | 23.89                      |       | 102.70 | 78.81  | 23.89     |       |
|                                         | 3          | 116.73    | 97.90 | 18.83                      | 16.69  | 92.64     | 119.40 | -26.76                     |        | 84.49     | 99.91  | -15.42                     |        | 106.09    | 87.60  | 18.49                      |       | 98.21     | 79.73  | 18.48                      |       | 98.21  | 79.73  | 18.48     |       |
|                                         | 2          | 104.60    | 77.51 | 27.09                      |        | 101.49    | 97.88  | 3.61                       |        | 90.54     | 91.59  | -1.05                      |        | 85.94     | 108.01 | -22.07                     |       | 76.29     | 113.15 | -36.86                     |       | 76.29  | 113.15 | -36.86    |       |
|                                         | 3          | 107.29    | 79.56 | 27.73                      | 19.09  | 108.95    | 93.96  | 14.99                      | 12.47  | 83.01     | 107.91 | -24.90                     |        | 81.52     | 104.62 | -23.10                     |       | 84.77     | 110.49 | -25.72                     |       | 84.77  | 110.49 | -25.72    |       |
|                                         | 3          | 97.34     | 94.89 | 2.45                       |        | 110.99    | 92.19  | 18.80                      |        | 72.82     | 112.47 | -39.65                     |        | 92.33     | 104.38 | -12.05                     |       | 72.63     | 115.63 | -43.00                     |       | 72.63  | 115.63 | -43.00    |       |
|                                         | 3          | 91.64     | 97.06 | -5.42                      |        | 82.33     | 89.12  | -6.79                      |        | 100.09    | 69.82  | 30.27                      |        | 82.54     | 63.24  | 19.30                      |       | 92.17     | 71.04  | 21.13                      |       | 92.17  | 71.04  | 21.13     |       |
|                                         | 2          | 83.27     | 86.88 | -3.61                      | -6.86  | 78.71     | 84.20  | -5.49                      | -5.01  | 108.71    | 64.31  | 44.40                      |        | 82.60     | 75.87  | 6.73                       |       | 116.35    | 106.92 | 9.43                       |       | 116.35 | 106.92 | 9.43      |       |
|                                         | 3          | 86.02     | 97.57 | -11.55                     |        | 85.20     | 87.94  | -2.74                      |        | 97.06     | 82.89  | 14.17                      |        | 85.57     | 75.75  | 9.82                       |       | 89.12     | 69.82  | 19.30                      |       | 89.12  | 69.82  | 19.30     |       |
|                                         | 3          | 71.85     | 92.35 | -20.50                     |        | 91.10     | 69.65  | 21.45                      |        | 126.65    | 70.62  | 56.03                      |        | 86.79     | 83.50  | 3.29                       |       | 107.93    | 95.40  | 12.53                      |       | 107.93 | 95.40  | 12.53     |       |
|                                         | 2          | 71.73     | 94.91 | -23.18                     | -22.86 | 91.77     | 70.50  | 21.27                      | 21.87  | 118.91    | 70.01  | 48.90                      |        | 87.74     | 83.36  | 4.38                       |       | 104.73    | 90.55  | 14.18                      |       | 104.73 | 90.55  | 14.18     |       |
|                                         | 3          | 73.72     | 98.62 | -24.90                     |        | 94.02     | 71.14  | 22.88                      |        | 118.43    | 72.52  | 45.91                      |        | 88.01     | 84.62  | 3.39                       |       | 105.13    | 89.32  | 15.81                      |       | 105.13 | 89.32  | 15.81     |       |
|                                         | 3          | 105.57    | 95.20 | 10.37                      |        | 95.16     | 80.27  | 14.89                      |        | 80.37     | 100.81 | -20.44                     |        | 100.11    | 82.04  | 18.07                      |       | 94.16     | 85.02  | 9.14                       |       | 94.16  | 85.02  | 9.14      |       |
|                                         | 2          | 105.46    | 94.81 | 10.65                      | 7.63   | 95.24     | 81.12  | 14.12                      | 14.69  | 81.98     | 97.56  | -15.58                     |        | 97.52     | 82.30  | 15.22                      |       | 86.07     | 83.70  | 2.37                       |       | 86.07  | 83.70  | 2.37      |       |
|                                         | 3          | 100.00    | 98.14 | 1.86                       |        | 95.91     | 80.86  | 15.05                      |        | 97.85     | 87.64  | 10.21                      |        | 103.50    | 80.84  | 22.66                      |       | 92.72     | 86.70  | 6.02                       |       | 92.72  | 86.70  | 6.02      |       |
|                                         | 3          | 101.76    | 86.20 | 15.56                      |        | 111.96    | 75.03  | 36.93                      |        | 121.55    | 83.06  | 38.49                      |        | 82.38     | 77.67  | 4.71                       |       | 99.23     | 91.61  | 7.62                       |       | 99.23  | 91.61  | 7.62      |       |
|                                         | 2          | 87.46     | 84.98 | 2.48                       | 8.30   | 113.27    | 72.60  | 40.67                      | 36.85  | 117.74    | 84.00  | 33.74                      |        | 83.80     | 78.60  | 5.20                       |       | 121.59    | 96.45  | 23.14                      |       | 121.59 | 96.45  | 23.14     |       |
|                                         | 3          | 95.65     | 88.80 | 6.85                       |        | 111.26    | 78.32  | 32.94                      |        | 112.74    | 86.43  | 26.31                      |        | 83.67     | 78.43  | 5.24                       |       | 122.72    | 97.30  | 25.42                      |       | 122.72 | 97.30  | 25.42     |       |
|                                         | 3          | 79.95     | 99.17 | -19.22                     |        | 92.93     | 103.37 | -10.44                     |        | 83.75     | 96.80  | -13.05                     |        | 77.18     | 76.99  | 0.19                       |       | 90.99     | 84.85  | 6.14                       |       | 90.99  | 84.85  | 6.14      |       |
|                                         | 2          | 81.31     | 88.66 | -7.35                      | -11.76 | 94.31     | 103.17 | -8.86                      | -11.33 | 86.02     | 96.73  | -10.71                     |        | 77.49     | 78.00  | -0.51                      |       | 91.39     | 88.50  | 2.89                       |       | 91.39  | 88.50  | 2.89      |       |
|                                         | 3          | 83.65     | 92.35 | -8.70                      |        | 97.88     | 112.56 | -14.68                     |        | 92.61     | 95.68  | -3.07                      |        | 77.26     | 78.54  | -1.28                      |       | 96.50     | 84.56  | 11.94                      |       | 96.50  | 84.56  | 11.94     |       |
|                                         | 3          | 100.17    | 75.06 | 25.11                      |        | 133.30    | 74.56  | 58.74                      |        | 70.61     | 107.54 | -36.93                     |        | 97.98     | 83.11  | 14.87                      |       | 113.01    | 94.98  | 18.03                      |       | 113.01 | 94.98  | 18.03     |       |
|                                         | 2          | 120.62    | 90.15 | 30.47                      | 26.99  | 112.26    | 80.17  | 32.09                      | 38.96  | 77.81     | 112.61 | -34.80                     |        | 104.30    | 92.70  | 11.60                      |       | 106.45    | 94.68  | 11.77                      |       | 106.45 | 94.68  | 11.77     |       |
|                                         | 3          | 106.26    | 80.87 | 25.39                      |        | 99.56     | 73.52  | 26.04                      |        | 84.70     | 104.84 | -20.14                     |        | 98.04     | 84.69  | 13.35                      |       | 103.96    | 90.75  | 13.21                      |       | 103.96 | 90.75  | 13.21     |       |
| Mean                                    |            | 95.62     | 90.96 | 4.65                       | 4.65   | 99.09     | 88.66  | 10.43                      | 10.43  | 94.60     | 91.41  | 3.19                       | 3.19   | 90.33     | 84.04  | 6.29                       | 6.29  | 98.86     | 90.79  | 8.07                       | 8.07  | 98.86  | 90.79  | 8.07      | 8.07  |
| SE                                      |            | 2.92      | 1.46  | 3.51                       | 6.03   | 2.46      | 3.32   | 4.60                       | 8.06   | 3.47      | 2.92   | 6.16                       | 10.58  | 1.97      | 2.06   | 2.47                       | 4.34  | 2.61      | 2.48   | 3.72                       | 6.50  | 2.61   | 2.48   | 3.72      | 6.50  |

| Group 10<br>Cmpd F1 (50 mg/kg<br>po, QD) | Trial<br># | Force (g) |        | Paw Wt<br>Distribution (g) |        | Force (g) |        | Paw Wt<br>Distribution (g) |        | Force (g) |        | Paw Wt<br>Distribution (g) |        | Force (g) |       | Paw Wt<br>Distribution (g) |       | Force (g) |        | Paw Wt<br>Distribution (g) |       |        |        |           |       |
|------------------------------------------|------------|-----------|--------|----------------------------|--------|-----------|--------|----------------------------|--------|-----------|--------|----------------------------|--------|-----------|-------|----------------------------|-------|-----------|--------|----------------------------|-------|--------|--------|-----------|-------|
|                                          |            | Left      | Right  | Per Trial                  | Mean   | Left      | Right  | Per Trial                  | Mean   | Left      | Right  | Per Trial                  | Mean   | Left      | Right | Per Trial                  | Mean  | Left      | Right  | Per Trial                  | Mean  | Left   | Right  | Per Trial | Mean  |
|                                          |            | Animal 1  | 1      | 89.35                      | 80.58  | 8.77      |        | 118.41                     | 81.07  | 37.34     |        | 103.24                     | 101.30 | 1.94      |       | 107.10                     | 78.51 | 28.59     |        | 100.04                     | 86.82 | 13.22  |        | 100.04    | 86.82 |
|                                          | 2          | 84.93     | 94.15  | -9.22                      | 1.67   | 118.48    | 79.49  | 38.99                      | 37.96  | 104.60    | 98.84  | 5.76                       | 4.82   | 127.40    | 84.21 | 43.19                      |       | 101.29    | 91.03  | 10.26                      |       | 101.29 | 91.03  | 10.26     |       |
|                                          | 3          | 91.50     | 86.03  | 5.47                       |        | 119.65    | 82.10  | 37.55                      |        | 104.28    | 97.52  | 6.76                       |        | 123.23    | 82.62 | 40.61                      |       | 100.56    | 92.92  | 7.64                       |       | 100.56 | 92.92  | 7.64      |       |
|                                          | 3          | 108.29    | 76.39  | 31.90                      |        | 92.15     | 100.78 | -8.63                      |        | 108.76    | 90.53  | 18.23                      |        | 96.37     | 74.44 | 21.93                      |       | 90.66     | 106.15 | -15.49                     |       | 90.66  | 106.15 | -15.49    |       |
|                                          | 2          | 108.21    | 78.51  | 29.70                      | 36.64  | 88.24     | 94.49  | -6.25                      | -6.79  | 118.11    | 71.87  | 46.24                      | 36.41  | 105.48    | 71.76 | 33.72                      |       | 93.39     | 117.37 | -23.98                     |       | 93.39  | 117.37 | -23.98    |       |
|                                          | 3          | 120.50    | 72.19  | 48.31                      |        | 95.68     | 101.18 | -5.50                      |        | 119.80    | 75.05  | 44.75                      |        | 102.34    | 77.76 | 24.58                      |       | 89.85     | 101.03 | -11.18                     |       | 89.85  | 101.03 | -11.18    |       |
|                                          | 3          | 105.22    | 83.33  | 21.89                      |        | 90.31     | 111.64 | -21.33                     |        | 87.45     | 100.72 | -13.27                     |        | 105.90    | 81.51 | 24.39                      |       | 95.58     | 83.05  | 12.53                      |       | 95.58  | 83.05  | 12.53     |       |
|                                          | 2          | 113.66    | 78.15  | 35.51                      | 26.18  | 96.44     | 108.22 | -11.78                     | -14.90 | 86.73     | 97.98  | -11.25                     |        | 113.14    | 83.35 | 29.79                      |       | 96.06     | 81.51  | 14.55                      |       | 96.06  | 81.51  | 14.55     |       |
|                                          | 3          | 108.84    | 87.69  | 21.15                      |        | 95.01     | 106.61 | -11.60                     |        | 88.21     | 91.13  | -2.92                      |        | 99.42     | 84.54 | 14.88                      |       | 98.43     | 83.31  | 15.12                      |       | 98.43  | 83.31  | 15.12     |       |
|                                          | 3          | 102.76    | 79.26  | 23.50                      |        | 103.13    | 84.63  | 18.50                      |        | 111.70    | 88.66  | 23.04                      |        | 95.84     | 97.90 | -2.06                      |       | 111.03    | 75.10  | 35.93                      |       | 111.03 | 75.10  | 35.93     |       |
|                                          | 2          | 103.65    | 80.28  | 23.37                      | 24.50  | 108.63    | 82.79  | 25.84                      | 22.64  | 106.74    | 99.67  | 7.07                       | 12.40  | 93.55     | 95.73 | 10.49                      |       | 106.19    | 73.51  | 32.68                      |       | 106.19 | 73.51  | 32.68     |       |
|                                          | 3          | 105.91    | 79.29  | 26.62                      |        | 109.15    | 85.57  | 23.58                      |        | 100.69    | 93.59  | 7.10                       |        | 92.32     | 96.48 | -4.16                      |       | 111.64    | 77.55  | 34.09                      |       | 111.64 | 77.55  | 34.09     |       |
|                                          | 3          | 92.81     | 115.67 | -22.86                     |        | 97.17     | 97.47  | -0.30                      |        | 91.04     | 71.32  | 19.72                      |        | 95.47     | 59.85 | 35.62                      |       | 95.98     | 82.71  | 13.27                      |       | 95.98  | 82.71  | 13.27     |       |
|                                          | 2          | 75.80     | 119.60 | -43.80                     | -38.63 | 94.85     | 96.53  | -1.68                      | -2.41  | 92.17     | 78.03  | 14.14                      | 17.32  | 83.12     | 72.63 | 10.49                      |       | 106.13    | 80.38  | 25.75                      |       | 106.13 | 80.38  | 25.75     |       |
|                                          | 3          | 79.42     | 128.65 | -49.23                     |        | 90.93     | 96.19  | -5.26                      |        | 91.40     | 73.30  | 18.10                      |        | 105.74    | 61.39 | 44.35                      |       | 94.36     | 79.80  | 14.56                      |       | 94.36  | 79.80  | 14.56     |       |
|                                          | 3          | 101.49    | 78.93  | 22.56                      |        | 102.65    | 110.05 | -7.40                      |        | 117.71    | 78.50  | 39.21                      |        | 100.14    | 63.07 | 37.07                      |       | 86.05     | 94.08  | -8.03                      |       | 86.05  | 94.08  | -8.03     |       |
|                                          | 2          | 99.62     | 84.55  | 15.07                      | 16.30  | 103.37    | 107.66 | -4.29                      | -11.21 | 116.37    | 88.87  | 27.50                      | 31.17  | 95.71     | 73.26 | 22.45                      |       | 92.97     | 100.84 | -7.87                      |       | 92.97  | 100.84 | -7.87     |       |
|                                          | 3          | 100.46    | 89.19  | 11.27                      |        | 85.82     | 107.75 | -21.93                     |        | 115.49    | 88.68  | 26.81                      |        | 102.35    | 83.40 | 18.95                      |       | 88.23     | 98.82  | -10.59                     |       | 88.23  | 98.82  | -10.59    |       |
|                                          | 3          | 72.83     | 96.19  | -23.36                     |        | 93.75     | 82.86  | 10.89                      |        | 74.41     | 87.50  | -13.09                     |        | 90.63     | 88.39 | 2.24                       |       | 93.40     | 77.36  | 16.04                      |       | 93.40  | 77.36  | 16.04     |       |
|                                          | 2          | 74.28     | 91.34  | -17.06                     | -19.49 | 96.46     | 83.28  | 13                         |        |           |        |                            |        |           |       |                            |       |           |        |                            |       |        |        |           |       |

## Weight Bearing Data for MMT/MCLT Trial 2

**Table 74.** Individual animal weight bearing data for the MMT/MCLT Trial 2 Day 7 Data

| Group 1<br>Vehicle (Saline)<br>IA, 1x/week | Trial # | Day 7 (Pre Tx) |       |                         |       | Day 7 (1hr) |       |                         |       | Day 7 (3hr) |       |                         |       | Day 7 (5hr) |       |                         |       |
|--------------------------------------------|---------|----------------|-------|-------------------------|-------|-------------|-------|-------------------------|-------|-------------|-------|-------------------------|-------|-------------|-------|-------------------------|-------|
|                                            |         | Force (g)      |       | Paw Wt Distribution (g) |       | Force (g)   |       | Paw Wt Distribution (g) |       | Force (g)   |       | Paw Wt Distribution (g) |       | Force (g)   |       | Paw Wt Distribution (g) |       |
|                                            |         | Left           | Right | Per Trial               | Mean  | Left        | Right | Per Trial               | Mean  | Left        | Right | Per Trial               | Mean  | Left        | Right | Per Trial               | Mean  |
| Animal 1                                   | 1       | 96             | 56    | 40                      | 39.67 | 74          | 56    | 18                      | 20.33 | 73          | 70    | 3                       | 6.00  | 74          | 54    | 20                      | 20.33 |
|                                            | 2       | 98             | 60    | 38                      |       | 75          | 53    | 22                      |       | 73          | 65    | 8                       |       | 74          | 54    | 20                      |       |
|                                            | 3       | 99             | 58    | 41                      |       | 76          | 55    | 21                      |       | 74          | 67    | 7                       |       | 78          | 57    | 21                      |       |
| 2                                          | 1       | 82             | 68    | 14                      | 11.33 | 78          | 70    | 8                       | 7.33  | 76          | 73    | 3                       | 7.33  | 74          | 62    | 12                      | 13.00 |
|                                            | 2       | 82             | 69    | 13                      |       | 74          | 68    | 6                       |       | 75          | 61    | 14                      |       | 76          | 63    | 13                      |       |
|                                            | 3       | 80             | 73    | 7                       |       | 79          | 71    | 8                       |       | 71          | 66    | 5                       |       | 74          | 60    | 14                      |       |
| 3                                          | 1       | 80             | 67    | 13                      | 16.00 | 72          | 61    | 11                      | 10.33 | 74          | 67    | 7                       | 6.33  | 70          | 56    | 14                      | 14.00 |
|                                            | 2       | 81             | 66    | 15                      |       | 75          | 63    | 12                      |       | 72          | 67    | 5                       |       | 67          | 53    | 14                      |       |
|                                            | 3       | 87             | 67    | 20                      |       | 72          | 64    | 8                       |       | 74          | 67    | 7                       |       | 66          | 52    | 14                      |       |
| 4                                          | 1       | 81             | 62    | 19                      | 21.00 | 83          | 50    | 33                      | 32.33 | 75          | 60    | 15                      | 13.33 | 62          | 57    | 5                       | 5.67  |
|                                            | 2       | 81             | 59    | 22                      |       | 85          | 54    | 31                      |       | 73          | 61    | 12                      |       | 62          | 56    | 6                       |       |
|                                            | 3       | 79             | 57    | 22                      |       | 83          | 50    | 33                      |       | 74          | 61    | 13                      |       | 61          | 55    | 6                       |       |
| 5                                          | 1       | 82             | 76    | 6                       | 7.67  | 81          | 64    | 17                      | 16.67 | 86          | 63    | 23                      | 24.33 | 70          | 57    | 13                      | 12.67 |
|                                            | 2       | 83             | 75    | 8                       |       | 82          | 66    | 16                      |       | 87          | 63    | 24                      |       | 70          | 57    | 13                      |       |
|                                            | 3       | 84             | 75    | 9                       |       | 82          | 65    | 17                      |       | 90          | 64    | 26                      |       | 71          | 59    | 12                      |       |
| 6                                          | 1       | 84             | 72    | 12                      | 14.67 | 86          | 55    | 31                      | 29.67 | 76          | 60    | 16                      | 17.67 | 83          | 73    | 10                      | 8.00  |
|                                            | 2       | 82             | 67    | 15                      |       | 86          | 56    | 30                      |       | 76          | 58    | 18                      |       | 80          | 72    | 8                       |       |
|                                            | 3       | 86             | 69    | 17                      |       | 85          | 57    | 28                      |       | 79          | 60    | 19                      |       | 80          | 74    | 6                       |       |
| 7                                          | 1       | 95             | 84    | 11                      | 10.33 | 91          | 87    | 4                       | 3.67  | 84          | 74    | 10                      | 11.00 | 82          | 76    | 6                       | 4.00  |
|                                            | 2       | 92             | 83    | 9                       |       | 87          | 82    | 5                       |       | 83          | 73    | 10                      |       | 82          | 80    | 2                       |       |
|                                            | 3       | 96             | 85    | 11                      |       | 87          | 85    | 2                       |       | 84          | 71    | 13                      |       | 83          | 79    | 4                       |       |
| 8                                          | 1       | 85             | 55    | 30                      | 29.00 | 94          | 61    | 33                      | 32.33 | 82          | 51    | 31                      | 32.33 | 81          | 42    | 39                      | 38.00 |
|                                            | 2       | 82             | 55    | 27                      |       | 92          | 61    | 31                      |       | 82          | 50    | 32                      |       | 81          | 43    | 38                      |       |
|                                            | 3       | 85             | 55    | 30                      |       | 95          | 62    | 33                      |       | 87          | 53    | 34                      |       | 81          | 44    | 37                      |       |
| 9                                          | 1       | 86             | 61    | 25                      | 26.33 | 77          | 58    | 19                      | 17.33 | 79          | 54    | 25                      | 24.33 | 75          | 62    | 13                      | 12.67 |
|                                            | 2       | 87             | 59    | 28                      |       | 76          | 59    | 17                      |       | 77          | 53    | 24                      |       | 73          | 62    | 11                      |       |
|                                            | 3       | 88             | 62    | 26                      |       | 75          | 59    | 16                      |       | 76          | 52    | 24                      |       | 76          | 62    | 14                      |       |
| 10                                         | 1       | 71             | 65    | 6                       | 7.67  | 81          | 77    | 4                       | 3.00  | 69          | 52    | 17                      | 18.00 | 77          | 47    | 30                      | 30.00 |
|                                            | 2       | 72             | 64    | 8                       |       | 81          | 77    | 4                       |       | 69          | 51    | 18                      |       | 76          | 46    | 30                      |       |
|                                            | 3       | 73             | 64    | 9                       |       | 80          | 79    | 1                       |       | 69          | 50    | 19                      |       | 77          | 47    | 30                      |       |
| Mean                                       |         | 84.63          | 66.27 | 18.37                   |       | 81.47       | 64.17 | 17.30                   | 17.30 | 77.30       | 61.23 | 16.07                   | 16.07 | 74.53       | 58.70 | 15.83                   | 15.83 |
| SE                                         |         | 1.30           | 1.57  | 1.89                    |       | 1.17        | 1.87  | 2.01                    | 3.58  | 1.07        | 1.37  | 1.61                    | 2.81  | 1.16        | 1.91  | 1.91                    | 3.41  |

| Group 2<br>Clonidine (d7, d14, d18-22)<br>00µg/kg (d7,18-22) or 200µg/kg (d14,22) | Trial # | Day 7 (Pre Tx) |       |                         |       | Day 7 (1hr) |       |                         |       | Day 7 (3hr) |       |                         |       | Day 7 (5hr) |       |                         |       |
|-----------------------------------------------------------------------------------|---------|----------------|-------|-------------------------|-------|-------------|-------|-------------------------|-------|-------------|-------|-------------------------|-------|-------------|-------|-------------------------|-------|
|                                                                                   |         | Force (g)      |       | Paw Wt Distribution (g) |       | Force (g)   |       | Paw Wt Distribution (g) |       | Force (g)   |       | Paw Wt Distribution (g) |       | Force (g)   |       | Paw Wt Distribution (g) |       |
|                                                                                   |         | Left           | Right | Per Trial               | Mean  | Left        | Right | Per Trial               | Mean  | Left        | Right | Per Trial               | Mean  | Left        | Right | Per Trial               | Mean  |
| Animal 1                                                                          | 1       | 82             | 68    | 14                      | 18.67 | 76          | 67    | 9                       | 9.00  | 80          | 63    | 17                      | 17.67 | 74          | 61    | 13                      | 10.00 |
|                                                                                   | 2       | 84             | 65    | 19                      |       | 76          | 67    | 9                       |       | 80          | 63    | 17                      |       | 73          | 61    | 12                      |       |
|                                                                                   | 3       | 80             | 57    | 23                      |       | 77          | 68    | 9                       |       | 81          | 62    | 19                      |       | 71          | 66    | 5                       |       |
| 2                                                                                 | 1       | 88             | 59    | 29                      | 29.67 | 95          | 71    | 24                      | 23.67 | 77          | 71    | 6                       | 6.00  | 81          | 74    | 7                       | 7.33  |
|                                                                                   | 2       | 86             | 56    | 30                      |       | 95          | 71    | 24                      |       | 77          | 71    | 6                       |       | 81          | 72    | 9                       |       |
|                                                                                   | 3       | 84             | 54    | 30                      |       | 94          | 71    | 23                      |       | 77          | 71    | 6                       |       | 80          | 74    | 6                       |       |
| 3                                                                                 | 1       | 79             | 73    | 6                       | 6.67  | 81          | 77    | 4                       | 4.33  | 87          | 71    | 16                      | 15.33 | 80          | 64    | 16                      | 15.33 |
|                                                                                   | 2       | 82             | 74    | 8                       |       | 81          | 77    | 4                       |       | 89          | 76    | 13                      |       | 81          | 64    | 17                      |       |
|                                                                                   | 3       | 79             | 73    | 6                       |       | 82          | 77    | 5                       |       | 91          | 74    | 17                      |       | 81          | 68    | 13                      |       |
| 4                                                                                 | 1       | 80             | 54    | 26                      | 27.67 | 87          | 79    | 8                       | 8.67  | 83          | 72    | 11                      | 12.67 | 72          | 59    | 13                      | 14.00 |
|                                                                                   | 2       | 83             | 54    | 29                      |       | 87          | 78    | 9                       |       | 84          | 71    | 13                      |       | 72          | 58    | 14                      |       |
|                                                                                   | 3       | 83             | 55    | 28                      |       | 88          | 79    | 9                       |       | 85          | 71    | 14                      |       | 75          | 60    | 15                      |       |
| 5                                                                                 | 1       | 89             | 66    | 23                      | 23.33 | 92          | 80    | 12                      | 12.33 | 83          | 72    | 11                      | 12.67 | 92          | 72    | 20                      | 20.00 |
|                                                                                   | 2       | 89             | 66    | 23                      |       | 92          | 80    | 12                      |       | 84          | 71    | 13                      |       | 92          | 72    | 20                      |       |
|                                                                                   | 3       | 89             | 65    | 24                      |       | 91          | 78    | 13                      |       | 85          | 71    | 14                      |       | 91          | 71    | 20                      |       |
| 6                                                                                 | 1       | 70             | 64    | 6                       | 5.00  | 79          | 68    | 11                      | 10.67 | 80          | 64    | 16                      | 12.33 | 94          | 66    | 28                      | 30.33 |
|                                                                                   | 2       | 70             | 64    | 6                       |       | 78          | 68    | 10                      |       | 81          | 69    | 12                      |       | 95          | 65    | 30                      |       |
|                                                                                   | 3       | 69             | 66    | 3                       |       | 79          | 68    | 11                      |       | 82          | 73    | 9                       |       | 99          | 66    | 33                      |       |
| 7                                                                                 | 1       | 87             | 67    | 20                      | 22.00 | 99          | 93    | 6                       | 5.67  | 81          | 64    | 17                      | 15.33 | 87          | 82    | 5                       | 6.00  |
|                                                                                   | 2       | 87             | 66    | 21                      |       | 99          | 93    | 6                       |       | 81          | 66    | 15                      |       | 86          | 81    | 5                       |       |
|                                                                                   | 3       | 91             | 66    | 25                      |       | 98          | 93    | 5                       |       | 79          | 65    | 14                      |       | 87          | 79    | 8                       |       |
| 8                                                                                 | 1       | 71             | 62    | 9                       | 5.67  | 71          | 63    | 8                       | 7.00  | 90          | 71    | 19                      | 19.00 | 94          | 77    | 17                      | 16.33 |
|                                                                                   | 2       | 73             | 69    | 4                       |       | 70          | 63    | 7                       |       | 90          | 71    | 19                      |       | 93          | 76    | 17                      |       |
|                                                                                   | 3       | 72             | 68    | 4                       |       | 71          | 65    | 6                       |       | 90          | 71    | 19                      |       | 94          | 79    | 15                      |       |
| 9                                                                                 | 1       | 70             | 53    | 17                      | 17.00 | 75          | 71    | 4                       | 8.00  | 80          | 61    | 19                      | 17.00 | 99          | 76    | 23                      | 21.67 |
|                                                                                   | 2       | 71             | 54    | 17                      |       | 76          | 71    | 5                       |       | 79          | 63    | 16                      |       | 100         | 77    | 23                      |       |
|                                                                                   | 3       | 70             | 53    | 17                      |       | 76          | 61    | 15                      |       | 80          | 64    | 16                      |       | 97          | 78    | 19                      |       |
| 10                                                                                | 1       | 83             | 67    | 16                      | 14.67 | 92          | 74    | 18                      | 20.33 | 97          | 70    | 27                      | 29.00 | 83          | 69    | 14                      | 19.00 |
|                                                                                   | 2       | 81             | 67    | 14                      |       | 93          | 73    | 20                      |       | 99          | 71    | 28                      |       | 85          | 62    | 23                      |       |
|                                                                                   | 3       | 80             | 66    | 14                      |       | 93          | 70    | 23                      |       | 97          | 65    | 32                      |       | 83          | 63    | 20                      |       |
| Mean                                                                              |         | 80.07          | 63.03 | 17.03                   |       | 84.77       | 73.80 | 10.97                   | 10.97 | 84.30       | 68.60 | 15.70                   | 15.70 | 85.73       | 69.73 | 16.00                   | 16.00 |
| SE                                                                                |         | 1.28           | 1.18  | 1.61                    |       | 1.67        | 1.54  | 1.16                    | 1.99  | 1.11        | 0.75  | 1.08                    | 1.88  | 1.63        | 1.31  | 1.34                    | 2.31  |

| Group 3<br>Cmpd A1<br>IA, 1x/week |       | Trial # | Force (g) |       | Paw Wt Distribution (g) |       | Force (g) |       | Paw Wt Distribution (g) |       | Force (g) |       | Paw Wt Distribution (g) |       | Force (g) |      | Paw Wt Distribution (g) |       |           |       |  |       |
|-----------------------------------|-------|---------|-----------|-------|-------------------------|-------|-----------|-------|-------------------------|-------|-----------|-------|-------------------------|-------|-----------|------|-------------------------|-------|-----------|-------|--|-------|
| Left                              | Right |         | Per Trial | Mean  | Left                    | Right | Per Trial | Mean  | Left                    | Right | Per Trial | Mean  | Left                    | Right | Per Trial | Mean | Left                    | Right | Per Trial | Mean  |  |       |
| <b>Animal 1</b>                   |       | 1       | 92        | 72    | 20                      |       | 24.33     | 90    | 79                      | 11    |           | 12.00 | 94                      | 60    | 34        |      | 33.67                   | 83    | 56        | 27    |  | 25.33 |
|                                   |       | 2       | 95        | 68    | 27                      |       |           | 90    | 79                      | 11    |           |       | 94                      | 60    | 34        |      |                         | 83    | 58        | 25    |  |       |
|                                   |       | 3       | 94        | 68    | 26                      |       |           | 98    | 84                      | 14    |           |       | 91                      | 58    | 33        |      |                         | 83    | 59        | 24    |  |       |
| <b>2</b>                          |       | 1       | 90        | 69    | 21                      |       | 20.67     | 97    | 80                      | 17    |           | 13.00 | 86                      | 66    | 20        |      | 24.33                   | 85    | 52        | 33    |  | 34.33 |
|                                   |       | 2       | 87        | 67    | 20                      |       |           | 96    | 83                      | 13    |           |       | 80                      | 58    | 22        |      |                         | 83    | 50        | 33    |  |       |
|                                   |       | 3       | 84        | 63    | 21                      |       |           | 96    | 87                      | 9     |           |       | 84                      | 53    | 31        |      |                         | 86    | 49        | 37    |  |       |
| <b>3</b>                          |       | 1       | 83        | 73    | 10                      |       | 8.00      | 81    | 56                      | 25    |           | 24.33 | 66                      | 49    | 17        |      | 16.00                   | 68    | 43        | 25    |  | 22.67 |
|                                   |       | 2       | 85        | 75    | 10                      |       |           | 81    | 57                      | 24    |           |       | 65                      | 49    | 16        |      |                         | 67    | 45        | 22    |  |       |
|                                   |       | 3       | 83        | 79    | 4                       |       |           | 82    | 58                      | 24    |           |       | 65                      | 50    | 15        |      |                         | 67    | 46        | 21    |  |       |
| <b>4</b>                          |       | 1       | 92        | 63    | 29                      |       | 30.33     | 86    | 71                      | 15    |           | 14.33 | 84                      | 45    | 39        |      | 39.00                   | 65    | 51        | 14    |  | 13.67 |
|                                   |       | 2       | 95        | 64    | 31                      |       |           | 85    | 71                      | 14    |           |       | 84                      | 47    | 37        |      |                         | 66    | 52        | 14    |  |       |
|                                   |       | 3       | 94        | 63    | 31                      |       |           | 85    | 71                      | 14    |           |       | 88                      | 47    | 41        |      |                         | 66    | 53        | 13    |  |       |
| <b>5</b>                          |       | 1       | 90        | 62    | 28                      |       | 30.00     | 82    | 65                      | 17    |           | 15.67 | 89                      | 51    | 38        |      | 38.00                   | 89    | 46        | 43    |  | 40.00 |
|                                   |       | 2       | 90        | 61    | 29                      |       |           | 82    | 66                      | 16    |           |       | 89                      | 51    | 38        |      |                         | 88    | 48        | 40    |  |       |
|                                   |       | 3       | 90        | 57    | 33                      |       |           | 80    | 66                      | 14    |           |       | 89                      | 51    | 38        |      |                         | 88    | 51        | 37    |  |       |
| <b>6</b>                          |       | 1       | 84        | 57    | 27                      |       | 24.67     | 81    | 69                      | 12    |           | 10.33 | 63                      | 50    | 13        |      | 13.00                   | 74    | 52        | 22    |  | 21.67 |
|                                   |       | 2       | 80        | 59    | 21                      |       |           | 80    | 69                      | 11    |           |       | 63                      | 50    | 13        |      |                         | 74    | 52        | 22    |  |       |
|                                   |       | 3       | 82        | 56    | 26                      |       |           | 80    | 72                      | 8     |           |       | 64                      | 51    | 13        |      |                         | 74    | 53        | 21    |  |       |
| <b>7</b>                          |       | 1       | 84        | 73    | 11                      |       | 10.33     | 95    | 77                      | 18    |           | 12.00 | 78                      | 54    | 24        |      | 24.33                   | 97    | 53        | 44    |  | 43.67 |
|                                   |       | 2       | 83        | 75    | 8                       |       |           | 75    | 76                      | -1    |           |       | 80                      | 55    | 25        |      |                         | 97    | 55        | 42    |  |       |
|                                   |       | 3       | 86        | 74    | 12                      |       |           | 94    | 75                      | 19    |           |       | 79                      | 55    | 24        |      |                         | 99    | 54        | 45    |  |       |
| <b>8</b>                          |       | 1       | 85        | 70    | 15                      |       | 14.33     | 94    | 77                      | 17    |           | 17.00 | 72                      | 64    | 8         |      | 6.67                    | 73    | 44        | 29    |  | 29.67 |
|                                   |       | 2       | 82        | 69    | 13                      |       |           | 94    | 77                      | 17    |           |       | 71                      | 65    | 6         |      |                         | 72    | 42        | 30    |  |       |
|                                   |       | 3       | 86        | 71    | 15                      |       |           | 93    | 76                      | 17    |           |       | 71                      | 65    | 6         |      |                         | 75    | 45        | 30    |  |       |
| <b>9</b>                          |       | 1       | 80        | 72    | 8                       |       | 9.00      | 95    | 88                      | 7     |           | 6.67  | 64                      | 49    | 15        |      | 16.00                   | 83    | 52        | 31    |  | 29.33 |
|                                   |       | 2       | 83        | 73    | 10                      |       |           | 95    | 89                      | 6     |           |       | 65                      | 48    | 17        |      |                         | 81    | 51        | 30    |  |       |
|                                   |       | 3       | 80        | 71    | 9                       |       |           | 95    | 88                      | 7     |           |       | 65                      | 49    | 16        |      |                         | 78    | 51        | 27    |  |       |
| <b>10</b>                         |       | 1       | 94        | 69    | 25                      |       | 24.00     | 83    | 72                      | 11    |           | 11.00 | 76                      | 55    | 21        |      | 20.00                   | 74    | 47        | 27    |  | 28.33 |
|                                   |       | 2       | 94        | 73    | 21                      |       |           | 83    | 72                      | 11    |           |       | 75                      | 56    | 19        |      |                         | 73    | 43        | 30    |  |       |
|                                   |       | 3       | 94        | 68    | 26                      |       |           | 84    | 73                      | 11    |           |       | 74                      | 54    | 20        |      |                         | 71    | 43        | 28    |  |       |
| <b>Mean</b>                       |       |         | 87.37     | 67.80 | 19.57                   |       |           | 87.73 | 74.10                   | 13.63 |           | 13.63 | 76.93                   | 53.83 | 23.10     |      | 23.10                   | 78.73 | 49.87     | 28.87 |  | 28.87 |
| <b>SE</b>                         |       |         | 0.93      | 1.10  | 1.54                    |       |           | 1.24  | 1.61                    | 1.03  |           | 1.50  | 1.89                    | 1.07  | 1.95      |      | 3.45                    | 1.77  | 0.84      | 1.58  |  | 2.80  |

| Group 4<br>Cmpd B<br>IA, 1x/week |       | Trial # | Force (g) |       | Paw Wt Distribution (g) |       | Force (g) |       | Paw Wt Distribution (g) |       | Force (g) |       | Paw Wt Distribution (g) |       | Force (g) |      | Paw Wt Distribution (g) |       |           |       |  |       |
|----------------------------------|-------|---------|-----------|-------|-------------------------|-------|-----------|-------|-------------------------|-------|-----------|-------|-------------------------|-------|-----------|------|-------------------------|-------|-----------|-------|--|-------|
| Left                             | Right |         | Per Trial | Mean  | Left                    | Right | Per Trial | Mean  | Left                    | Right | Per Trial | Mean  | Left                    | Right | Per Trial | Mean | Left                    | Right | Per Trial | Mean  |  |       |
| <b>Animal 1</b>                  |       | 1       | 81        | 74    | 7                       |       | 10.67     | 92    | 70                      | 22    |           | 16.33 | 81                      | 53    | 28        |      | 26.33                   | 89    | 61        | 28    |  | 26.33 |
|                                  |       | 2       | 85        | 72    | 13                      |       |           | 92    | 79                      | 13    |           |       | 82                      | 57    | 25        |      |                         | 88    | 61        | 27    |  |       |
|                                  |       | 3       | 84        | 72    | 12                      |       |           | 90    | 76                      | 14    |           |       | 84                      | 58    | 26        |      |                         | 87    | 63        | 24    |  |       |
| <b>2</b>                         |       | 1       | 99        | 71    | 28                      |       | 20.33     | 82    | 57                      | 25    |           | 22.67 | 79                      | 63    | 16        |      | 16.67                   | 73    | 59        | 14    |  | 13.33 |
|                                  |       | 2       | 98        | 72    | 26                      |       |           | 80    | 58                      | 22    |           |       | 79                      | 62    | 17        |      |                         | 72    | 60        | 12    |  |       |
|                                  |       | 3       | 79        | 72    | 7                       |       |           | 78    | 57                      | 21    |           |       | 79                      | 62    | 17        |      |                         | 74    | 60        | 14    |  |       |
| <b>3</b>                         |       | 1       | 81        | 61    | 20                      |       | 14.33     | 92    | 63                      | 29    |           | 29.00 | 93                      | 65    | 28        |      | 27.67                   | 71    | 51        | 20    |  | 18.00 |
|                                  |       | 2       | 81        | 68    | 13                      |       |           | 92    | 64                      | 28    |           |       | 96                      | 62    | 34        |      |                         | 70    | 53        | 17    |  |       |
|                                  |       | 3       | 80        | 70    | 10                      |       |           | 91    | 61                      | 30    |           |       | 93                      | 72    | 21        |      |                         | 71    | 54        | 17    |  |       |
| <b>4</b>                         |       | 1       | 74        | 56    | 18                      |       | 17.67     | 85    | 59                      | 26    |           | 22.67 | 84                      | 58    | 26        |      | 24.67                   | 74    | 66        | 8     |  | 8.00  |
|                                  |       | 2       | 74        | 57    | 17                      |       |           | 85    | 63                      | 22    |           |       | 81                      | 57    | 24        |      |                         | 74    | 66        | 8     |  |       |
|                                  |       | 3       | 74        | 56    | 18                      |       |           | 85    | 65                      | 20    |           |       | 82                      | 58    | 24        |      |                         | 73    | 65        | 8     |  |       |
| <b>5</b>                         |       | 1       | 79        | 69    | 10                      |       | 8.67      | 70    | 61                      | 9     |           | 8.33  | 71                      | 61    | 10        |      | 8.67                    | 75    | 52        | 23    |  | 21.67 |
|                                  |       | 2       | 78        | 69    | 9                       |       |           | 70    | 62                      | 8     |           |       | 71                      | 62    | 9         |      |                         | 75    | 55        | 20    |  |       |
|                                  |       | 3       | 76        | 69    | 7                       |       |           | 69    | 61                      | 8     |           |       | 71                      | 64    | 7         |      |                         | 76    | 54        | 22    |  |       |
| <b>6</b>                         |       | 1       | 80        | 69    | 11                      |       | 9.33      | 62    | 52                      | 10    |           | 10.00 | 64                      | 53    | 11        |      | 7.33                    | 71    | 51        | 20    |  | 20.00 |
|                                  |       | 2       | 79        | 70    | 9                       |       |           | 62    | 51                      | 11    |           |       | 64                      | 59    | 5         |      |                         | 72    | 50        | 22    |  |       |
|                                  |       | 3       | 76        | 68    | 8                       |       |           | 61    | 52                      | 9     |           |       | 65                      | 59    | 6         |      |                         | 70    | 52        | 18    |  |       |
| <b>7</b>                         |       | 1       | 71        | 67    | 4                       |       | 3.67      | 83    | 55                      | 28    |           | 28.00 | 85                      | 58    | 27        |      | 27.00                   | 73    | 69        | 4     |  | 4.33  |
|                                  |       | 2       | 73        | 68    | 5                       |       |           | 84    | 55                      | 29    |           |       | 87                      | 60    | 27        |      |                         | 72    | 68        | 4     |  |       |
|                                  |       | 3       | 73        | 71    | 2                       |       |           | 83    | 56                      | 27    |           |       | 87                      | 60    | 27        |      |                         | 72    | 67        | 5     |  |       |
| <b>8</b>                         |       | 1       | 76        | 58    | 18                      |       | 18.00     | 81    | 66                      | 15    |           | 13.67 | 65                      | 59    | 6         |      | 7.00                    | 75    | 55        | 20    |  | 11.33 |
|                                  |       | 2       | 80        | 64    | 16                      |       |           | 82    | 69                      | 13    |           |       | 69                      | 61    | 8         |      |                         | 71    | 64        | 7     |  |       |
|                                  |       | 3       | 83        | 63    | 20                      |       |           | 79    | 66                      | 13    |           |       | 69                      | 62    | 7         |      |                         | 74    | 67        | 7     |  |       |
| <b>9</b>                         |       | 1       | 90        | 82    | 8                       |       | 7.33      | 87    | 67                      | 20    |           | 17.67 | 73                      | 68    | 5         |      | 5.67                    | 82    | 65        | 17    |  | 16.00 |
|                                  |       | 2       | 89        | 83    | 6                       |       |           | 84    | 69                      | 15    |           |       | 73                      | 67    | 6         |      |                         | 82    | 67        | 15    |  |       |
|                                  |       | 3       | 92        | 84    | 8                       |       |           | 85    | 67                      | 18    |           |       | 72                      | 66    | 6         |      |                         | 80    | 64        | 16    |  |       |
| <b>10</b>                        |       | 1       | 91        | 68    | 23                      |       | 20.67     | 86    | 58                      | 28    |           | 28.00 | 89                      | 84    | 5         |      | 6.00                    | 86    | 54        | 32    |  | 31.33 |
|                                  |       | 2       | 89        | 70    | 19                      |       |           | 87    | 58                      | 29    |           |       | 88                      | 83    | 5         |      |                         | 85    | 54        | 31    |  |       |
|                                  |       | 3       | 87        | 67    | 20                      |       |           | 86    | 59                      | 27    |           |       | 87                      | 79    | 8         |      |                         | 84    | 53        | 31    |  |       |
| <b>Mean</b>                      |       |         | 81.73     | 68.67 | 13.07                   |       |           | 81.50 | 61.87                   | 19.63 |           | 19.63 | 78.77                   | 63.07 | 15.70     |      | 15.70                   | 76.37 | 59.33     | 17.03 |  | 17.03 |
| <b>SE</b>                        |       |         | 1.34      | 1.27  | 1.24                    |       |           | 1.66  | 1.23                    | 1.38  |           | 2.40  | 1.70                    | 1.39  | 1.76      |      | 3.08                    | 1.10  | 1.14      | 1.51  |  | 2.61  |

| Group 5<br>Cmpd C1<br>IA, 1x/week |  | Trial # | Force (g)    |              | Paw Wt Distribution (g) |              | Force (g)    |              | Paw Wt Distribution (g) |              | Force (g)    |              | Paw Wt Distribution (g) |              | Force (g)    |              | Paw Wt Distribution (g) |              |
|-----------------------------------|--|---------|--------------|--------------|-------------------------|--------------|--------------|--------------|-------------------------|--------------|--------------|--------------|-------------------------|--------------|--------------|--------------|-------------------------|--------------|
|                                   |  |         | Left         | Right        | Per Trial               | Mean         | Left         | Right        | Per Trial               | Mean         | Left         | Right        | Per Trial               | Mean         | Left         | Right        | Per Trial               | Mean         |
|                                   |  |         |              |              |                         |              |              |              |                         |              |              |              |                         |              |              |              |                         |              |
| <b>Animal 1</b>                   |  | 1       | 63           | 51           | 12                      |              | 74           | 64           | 10                      |              | 84           | 75           | 9                       |              | 82           | 61           | 21                      |              |
|                                   |  | 2       | 62           | 51           | 11                      | <b>10.00</b> | 74           | 64           | 10                      | <b>10.00</b> | 83           | 72           | 11                      | <b>8.33</b>  | 82           | 62           | 20                      | <b>19.67</b> |
|                                   |  | 3       | 62           | 55           | 7                       |              | 72           | 62           | 10                      |              | 85           | 80           | 5                       |              | 81           | 63           | 18                      |              |
| <b>2</b>                          |  | 1       | 92           | 83           | 9                       |              | 100          | 87           | 13                      |              | 93           | 68           | 25                      | <b>24.00</b> | 87           | 63           | 24                      | <b>20.67</b> |
|                                   |  | 2       | 92           | 78           | 14                      | <b>12.67</b> | 100          | 87           | 13                      | <b>13.00</b> | 90           | 67           | 23                      | <b>24.00</b> | 86           | 64           | 22                      | <b>20.67</b> |
|                                   |  | 3       | 97           | 82           | 15                      |              | 101          | 88           | 13                      |              | 93           | 69           | 24                      |              | 83           | 67           | 16                      |              |
| <b>3</b>                          |  | 1       | 89           | 63           | 26                      |              | 85           | 66           | 19                      |              | 82           | 69           | 13                      | <b>11.67</b> | 82           | 68           | 14                      |              |
|                                   |  | 2       | 90           | 62           | 28                      | <b>27.33</b> | 84           | 65           | 19                      | <b>19.00</b> | 82           | 69           | 13                      | <b>11.67</b> | 81           | 67           | 14                      | <b>13.67</b> |
|                                   |  | 3       | 92           | 64           | 28                      |              | 84           | 65           | 19                      |              | 80           | 71           | 9                       |              | 81           | 68           | 13                      |              |
| <b>4</b>                          |  | 1       | 70           | 55           | 15                      |              | 70           | 54           | 16                      |              | 57           | 42           | 15                      | <b>14.00</b> | 63           | 45           | 18                      |              |
|                                   |  | 2       | 70           | 54           | 16                      | <b>15.33</b> | 70           | 54           | 16                      | <b>16.33</b> | 57           | 42           | 15                      | <b>14.00</b> | 63           | 47           | 16                      | <b>17.00</b> |
|                                   |  | 3       | 70           | 55           | 15                      |              | 71           | 54           | 17                      |              | 57           | 45           | 12                      |              | 63           | 46           | 17                      |              |
| <b>5</b>                          |  | 1       | 73           | 62           | 11                      |              | 70           | 54           | 16                      |              | 72           | 63           | 9                       |              | 61           | 55           | 6                       |              |
|                                   |  | 2       | 71           | 64           | 7                       | <b>9.33</b>  | 70           | 54           | 16                      | <b>16.33</b> | 72           | 65           | 7                       | <b>7.33</b>  | 61           | 56           | 5                       | <b>5.67</b>  |
|                                   |  | 3       | 74           | 64           | 10                      |              | 74           | 57           | 17                      |              | 74           | 68           | 6                       |              | 58           | 52           | 6                       |              |
| <b>6</b>                          |  | 1       | 91           | 82           | 9                       |              | 88           | 77           | 11                      |              | 83           | 43           | 40                      | <b>40.33</b> | 86           | 44           | 42                      |              |
|                                   |  | 2       | 91           | 80           | 11                      | <b>9.67</b>  | 86           | 77           | 9                       | <b>10.00</b> | 84           | 43           | 41                      | <b>40.33</b> | 86           | 45           | 41                      | <b>43.00</b> |
|                                   |  | 3       | 90           | 81           | 9                       |              | 86           | 76           | 10                      |              | 84           | 44           | 40                      |              | 90           | 44           | 46                      |              |
| <b>7</b>                          |  | 1       | 86           | 56           | 30                      |              | 73           | 63           | 10                      |              | 65           | 51           | 14                      |              | 60           | 51           | 9                       |              |
|                                   |  | 2       | 86           | 53           | 33                      | <b>32.67</b> | 70           | 64           | 6                       | <b>7.67</b>  | 62           | 51           | 11                      | <b>11.33</b> | 60           | 52           | 8                       | <b>8.00</b>  |
|                                   |  | 3       | 88           | 53           | 35                      |              | 71           | 64           | 7                       |              | 59           | 50           | 9                       |              | 58           | 51           | 7                       |              |
| <b>8</b>                          |  | 1       | 96           | 77           | 19                      |              | 79           | 71           | 8                       |              | 77           | 40           | 37                      | <b>35.67</b> | 75           | 44           | 31                      |              |
|                                   |  | 2       | 96           | 79           | 17                      | <b>18.33</b> | 78           | 71           | 7                       | <b>7.67</b>  | 77           | 41           | 36                      | <b>35.67</b> | 75           | 40           | 35                      | <b>33.67</b> |
|                                   |  | 3       | 96           | 77           | 19                      |              | 79           | 71           | 8                       |              | 76           | 42           | 34                      |              | 77           | 42           | 35                      |              |
| <b>9</b>                          |  | 1       | 96           | 66           | 30                      |              | 85           | 68           | 17                      |              | 61           | 53           | 8                       |              | 66           | 54           | 12                      |              |
|                                   |  | 2       | 96           | 60           | 36                      | <b>30.67</b> | 84           | 66           | 18                      | <b>18.33</b> | 63           | 51           | 12                      | <b>10.00</b> | 66           | 54           | 12                      | <b>10.33</b> |
|                                   |  | 3       | 92           | 66           | 26                      |              | 85           | 65           | 20                      |              | 63           | 53           | 10                      |              | 64           | 57           | 7                       |              |
| <b>10</b>                         |  | 1       | 76           | 59           | 17                      |              | 89           | 74           | 15                      |              | 74           | 51           | 23                      |              | 61           | 33           | 28                      |              |
|                                   |  | 2       | 73           | 60           | 13                      | <b>12.67</b> | 80           | 74           | 6                       | <b>10.00</b> | 77           | 52           | 25                      | <b>24.33</b> | 60           | 34           | 26                      | <b>24.67</b> |
|                                   |  | 3       | 74           | 66           | 8                       |              | 83           | 74           | 9                       |              | 78           | 53           | 25                      |              | 56           | 36           | 20                      |              |
| <b>Mean</b>                       |  |         | <b>83.13</b> | <b>65.27</b> | <b>17.87</b>            |              | <b>80.50</b> | <b>67.67</b> | <b>12.83</b>            | <b>12.83</b> | <b>74.80</b> | <b>56.10</b> | <b>18.70</b>            | <b>18.70</b> | <b>71.80</b> | <b>52.17</b> | <b>19.63</b>            | <b>19.63</b> |
| <b>SE</b>                         |  |         | <b>2.15</b>  | <b>1.96</b>  | <b>1.65</b>             |              | <b>1.69</b>  | <b>1.77</b>  | <b>0.81</b>             | <b>1.38</b>  | <b>2.00</b>  | <b>2.23</b>  | <b>2.10</b>             | <b>3.73</b>  | <b>2.05</b>  | <b>1.89</b>  | <b>2.09</b>             | <b>3.69</b>  |

| Group 6<br>Cmpd C2<br>IA, 1x/week |  | Trial # | Force (g)    |              | Paw Wt Distribution (g) |              | Force (g)    |              | Paw Wt Distribution (g) |              | Force (g)    |              | Paw Wt Distribution (g) |              | Force (g)    |              | Paw Wt Distribution (g) |              |
|-----------------------------------|--|---------|--------------|--------------|-------------------------|--------------|--------------|--------------|-------------------------|--------------|--------------|--------------|-------------------------|--------------|--------------|--------------|-------------------------|--------------|
|                                   |  |         | Left         | Right        | Per Trial               | Mean         | Left         | Right        | Per Trial               | Mean         | Left         | Right        | Per Trial               | Mean         | Left         | Right        | Per Trial               | Mean         |
|                                   |  |         |              |              |                         |              |              |              |                         |              |              |              |                         |              |              |              |                         |              |
| <b>Animal 1</b>                   |  | 1       | 98           | 67           | 31                      |              | 77           | 54           | 23                      |              | 78           | 33           | 45                      |              | 75           | 49           | 26                      |              |
|                                   |  | 2       | 95           | 71           | 24                      | <b>27.33</b> | 75           | 52           | 23                      | <b>24.33</b> | 77           | 33           | 44                      | <b>42.67</b> | 82           | 49           | 33                      | <b>28.33</b> |
|                                   |  | 3       | 99           | 72           | 27                      |              | 78           | 51           | 27                      |              | 75           | 36           | 39                      |              | 77           | 51           | 26                      |              |
| <b>2</b>                          |  | 1       | 74           | 58           | 16                      |              | 75           | 59           | 16                      |              | 54           | 42           | 12                      | <b>13.33</b> | 67           | 35           | 32                      |              |
|                                   |  | 2       | 79           | 59           | 20                      | <b>18.33</b> | 79           | 62           | 17                      | <b>15.67</b> | 55           | 43           | 12                      | <b>13.33</b> | 68           | 36           | 32                      | <b>31.33</b> |
|                                   |  | 3       | 76           | 57           | 19                      |              | 74           | 60           | 14                      |              | 59           | 43           | 16                      |              | 65           | 35           | 30                      |              |
| <b>3</b>                          |  | 1       | 67           | 52           | 15                      |              | 76           | 59           | 17                      |              | 67           | 42           | 25                      | <b>22.67</b> | 46           | 32           | 14                      |              |
|                                   |  | 2       | 70           | 56           | 14                      | <b>14.33</b> | 77           | 60           | 17                      | <b>17.00</b> | 66           | 45           | 21                      | <b>22.67</b> | 44           | 35           | 9                       | <b>11.00</b> |
|                                   |  | 3       | 70           | 56           | 14                      |              | 73           | 56           | 17                      |              | 67           | 45           | 22                      |              | 46           | 36           | 10                      |              |
| <b>4</b>                          |  | 1       | 73           | 61           | 12                      |              | 89           | 67           | 22                      |              | 84           | 76           | 8                       |              | 93           | 67           | 26                      |              |
|                                   |  | 2       | 73           | 64           | 9                       | <b>10.00</b> | 89           | 70           | 19                      | <b>20.67</b> | 84           | 73           | 11                      | <b>10.00</b> | 94           | 64           | 30                      | <b>27.00</b> |
|                                   |  | 3       | 72           | 63           | 9                       |              | 88           | 67           | 21                      |              | 84           | 73           | 11                      |              | 90           | 65           | 25                      |              |
| <b>5</b>                          |  | 1       | 85           | 71           | 14                      |              | 72           | 62           | 10                      |              | 72           | 66           | 6                       |              | 85           | 65           | 20                      |              |
|                                   |  | 2       | 84           | 75           | 9                       | <b>10.00</b> | 69           | 63           | 6                       | <b>8.67</b>  | 72           | 68           | 4                       | <b>4.33</b>  | 83           | 66           | 17                      | <b>19.00</b> |
|                                   |  | 3       | 85           | 78           | 7                       |              | 76           | 66           | 10                      |              | 70           | 67           | 3                       |              | 86           | 66           | 20                      |              |
| <b>6</b>                          |  | 1       | 82           | 71           | 11                      |              | 89           | 56           | 33                      |              | 62           | 60           | 2                       |              | 80           | 53           | 27                      |              |
|                                   |  | 2       | 81           | 71           | 10                      | <b>8.67</b>  | 86           | 53           | 33                      | <b>32.33</b> | 62           | 60           | 2                       | <b>4.00</b>  | 80           | 53           | 27                      | <b>27.67</b> |
|                                   |  | 3       | 82           | 77           | 5                       |              | 88           | 57           | 31                      |              | 68           | 60           | 8                       |              | 82           | 53           | 29                      |              |
| <b>7</b>                          |  | 1       | 80           | 51           | 29                      |              | 75           | 67           | 8                       |              | 80           | 63           | 17                      |              | 71           | 48           | 23                      |              |
|                                   |  | 2       | 82           | 57           | 25                      | <b>26.00</b> | 78           | 67           | 11                      | <b>9.67</b>  | 80           | 64           | 16                      | <b>15.00</b> | 72           | 45           | 27                      | <b>23.33</b> |
|                                   |  | 3       | 83           | 59           | 24                      |              | 77           | 67           | 10                      |              | 80           | 68           | 12                      |              | 70           | 50           | 20                      |              |
| <b>8</b>                          |  | 1       | 86           | 69           | 17                      |              | 87           | 55           | 32                      |              | 82           | 43           | 39                      |              | 62           | 30           | 32                      |              |
|                                   |  | 2       | 87           | 70           | 17                      | <b>17.33</b> | 87           | 54           | 33                      | <b>31.67</b> | 83           | 44           | 39                      | <b>39.33</b> | 63           | 30           | 33                      | <b>32.00</b> |
|                                   |  | 3       | 86           | 68           | 18                      |              | 84           | 54           | 30                      |              | 84           | 44           | 40                      |              | 62           | 31           | 31                      |              |
| <b>9</b>                          |  | 1       | 84           | 73           | 11                      |              | 70           | 61           | 9                       |              | 84           | 49           | 35                      |              | 88           | 58           | 30                      |              |
|                                   |  | 2       | 88           | 74           | 14                      | <b>10.67</b> | 80           | 71           | 9                       | <b>8.00</b>  | 85           | 51           | 34                      | <b>34.67</b> | 86           | 57           | 29                      | <b>29.33</b> |
|                                   |  | 3       | 83           | 76           | 7                       |              | 73           | 67           | 6                       |              | 86           | 51           | 35                      |              | 84           | 55           | 29                      |              |
| <b>10</b>                         |  | 1       | 86           | 53           | 33                      |              | 81           | 58           | 23                      |              | 77           | 40           | 37                      |              | 73           | 42           | 31                      |              |
|                                   |  | 2       | 85           | 58           | 27                      | <b>29.00</b> | 84           | 57           | 27                      | <b>25.00</b> | 79           | 39           | 40                      | <b>36.33</b> | 72           | 43           | 29                      | <b>31.00</b> |
|                                   |  | 3       | 83           | 56           | 27                      |              | 79           | 54           | 25                      |              | 74           | 42           | 32                      |              | 76           | 43           | 33                      |              |
| <b>Mean</b>                       |  |         | <b>81.93</b> | <b>64.77</b> | <b>17.17</b>            |              | <b>79.50</b> | <b>60.20</b> | <b>19.30</b>            | <b>19.30</b> | <b>74.33</b> | <b>52.10</b> | <b>22.23</b>            | <b>22.23</b> | <b>74.07</b> | <b>48.07</b> | <b>26.00</b>            | <b>26.00</b> |
| <b>SE</b>                         |  |         | <b>1.42</b>  | <b>1.51</b>  | <b>1.44</b>             |              | <b>1.12</b>  | <b>1.07</b>  | <b>1.61</b>             | <b>2.86</b>  | <b>1.72</b>  | <b>2.38</b>  | <b>2.65</b>             | <b>4.71</b>  | <b>2.42</b>  | <b>2.21</b>  | <b>1.21</b>             | <b>2.08</b>  |



| Group 7<br>Cmpd D<br>IA, 1x/week |       | Trial # | Force (g) |       | Paw Wt Distribution (g) |       | Force (g) |       | Paw Wt Distribution (g) |       | Force (g) |       | Paw Wt Distribution (g) |       | Force (g) |       | Paw Wt Distribution (g) |       |           |       |
|----------------------------------|-------|---------|-----------|-------|-------------------------|-------|-----------|-------|-------------------------|-------|-----------|-------|-------------------------|-------|-----------|-------|-------------------------|-------|-----------|-------|
| Left                             | Right |         | Per Trial | Mean  | Left                    | Right | Per Trial | Mean  | Left                    | Right | Per Trial | Mean  | Left                    | Right | Per Trial | Mean  | Left                    | Right | Per Trial | Mean  |
| <b>Animal 1</b>                  |       | 1       | 82        | 71    | 11                      |       | 82        | 63    | 19                      |       | 71        | 64    | 7                       |       | 70        | 65    | 5                       |       | 5         |       |
|                                  |       | 2       | 83        | 72    | 11                      | 11.33 | 83        | 63    | 20                      | 21.00 | 71        | 64    | 7                       | 7.67  | 68        | 64    | 4                       | 5.67  |           |       |
|                                  |       | 3       | 83        | 71    | 12                      |       | 87        | 63    | 24                      |       | 71        | 62    | 9                       |       | 70        | 62    | 8                       |       |           |       |
| <b>2</b>                         |       | 1       | 96        | 82    | 14                      |       | 83        | 75    | 8                       |       | 83        | 76    | 7                       |       | 78        | 62    | 16                      |       | 12        | 12.33 |
|                                  |       | 2       | 94        | 80    | 14                      | 12.33 | 80        | 75    | 5                       | 5.00  | 87        | 75    | 12                      | 9.00  | 78        | 66    | 12                      |       |           |       |
|                                  |       | 3       | 89        | 80    | 9                       |       | 77        | 75    | 2                       |       | 84        | 76    | 8                       |       | 76        | 67    | 9                       |       |           |       |
| <b>3</b>                         |       | 1       | 91        | 69    | 22                      |       | 77        | 47    | 30                      |       | 73        | 59    | 14                      |       | 76        | 53    | 23                      |       | 23        | 22.33 |
|                                  |       | 2       | 91        | 70    | 21                      | 21.67 | 76        | 46    | 30                      | 30.00 | 74        | 59    | 15                      | 14.33 | 76        | 53    | 23                      |       |           |       |
|                                  |       | 3       | 91        | 69    | 22                      |       | 77        | 47    | 30                      |       | 73        | 59    | 14                      |       | 75        | 54    | 21                      |       |           |       |
| <b>4</b>                         |       | 1       | 82        | 71    | 11                      |       | 83        | 73    | 10                      |       | 83        | 67    | 16                      |       | 73        | 62    | 11                      |       | 9         | 9.00  |
|                                  |       | 2       | 86        | 71    | 15                      | 12.00 | 84        | 73    | 11                      | 12.00 | 82        | 65    | 17                      | 17.00 | 73        | 65    | 8                       |       |           |       |
|                                  |       | 3       | 82        | 72    | 10                      |       | 84        | 69    | 15                      |       | 82        | 64    | 18                      |       | 72        | 64    | 8                       |       |           |       |
| <b>5</b>                         |       | 1       | 86        | 51    | 35                      |       | 84        | 63    | 21                      |       | 87        | 59    | 28                      |       | 72        | 60    | 12                      |       | 12        | 12.67 |
|                                  |       | 2       | 85        | 51    | 34                      | 33.33 | 84        | 63    | 21                      | 22.00 | 87        | 60    | 27                      | 26.67 | 72        | 60    | 12                      |       |           |       |
|                                  |       | 3       | 84        | 53    | 31                      |       | 84        | 60    | 24                      |       | 86        | 61    | 25                      |       | 74        | 60    | 14                      |       |           |       |
| <b>6</b>                         |       | 1       | 76        | 51    | 25                      |       | 86        | 52    | 34                      |       | 83        | 50    | 33                      |       | 94        | 54    | 40                      |       | 40        | 39.67 |
|                                  |       | 2       | 70        | 57    | 13                      | 19.33 | 86        | 54    | 32                      | 32.00 | 84        | 50    | 34                      | 33.00 | 94        | 54    | 40                      |       |           |       |
|                                  |       | 3       | 72        | 52    | 20                      |       | 84        | 54    | 30                      |       | 82        | 50    | 32                      |       | 92        | 53    | 39                      |       |           |       |
| <b>7</b>                         |       | 1       | 82        | 63    | 19                      |       | 96        | 73    | 23                      |       | 83        | 70    | 13                      |       | 79        | 55    | 24                      |       | 24        | 21.67 |
|                                  |       | 2       | 85        | 71    | 14                      | 17.00 | 95        | 71    | 24                      | 22.67 | 85        | 70    | 15                      | 15.00 | 78        | 58    | 20                      |       |           |       |
|                                  |       | 3       | 86        | 68    | 18                      |       | 92        | 71    | 21                      |       | 84        | 67    | 17                      |       | 78        | 57    | 21                      |       |           |       |
| <b>8</b>                         |       | 1       | 71        | 66    | 5                       |       | 57        | 50    | 7                       |       | 78        | 66    | 12                      |       | 86        | 67    | 19                      |       | 18        | 18.00 |
|                                  |       | 2       | 72        | 66    | 6                       | 5.67  | 57        | 51    | 6                       | 6.00  | 78        | 66    | 12                      | 12.00 | 84        | 66    | 18                      |       |           |       |
|                                  |       | 3       | 72        | 66    | 6                       |       | 57        | 52    | 5                       |       | 79        | 67    | 12                      |       | 81        | 64    | 17                      |       |           |       |
| <b>9</b>                         |       | 1       | 85        | 80    | 5                       |       | 80        | 70    | 10                      |       | 81        | 45    | 36                      |       | 80        | 59    | 21                      |       | 21        | 21.67 |
|                                  |       | 2       | 83        | 77    | 6                       | 5.67  | 82        | 68    | 14                      | 12.67 | 83        | 46    | 37                      | 37.33 | 80        | 59    | 21                      |       |           |       |
|                                  |       | 3       | 82        | 76    | 6                       |       | 81        | 67    | 14                      |       | 84        | 45    | 39                      |       | 81        | 58    | 23                      |       |           |       |
| <b>10</b>                        |       | 1       | 84        | 60    | 24                      |       | 90        | 61    | 29                      |       | 93        | 80    | 13                      |       | 92        | 52    | 40                      |       | 40        | 40.67 |
|                                  |       | 2       | 85        | 63    | 22                      | 22.33 | 87        | 61    | 26                      | 27.33 | 91        | 81    | 10                      | 10.67 | 91        | 49    | 42                      |       |           |       |
|                                  |       | 3       | 83        | 62    | 21                      |       | 90        | 63    | 27                      |       | 90        | 81    | 9                       |       | 89        | 49    | 40                      |       |           |       |
| <b>Mean</b>                      |       |         | 83.10     | 67.03 | 16.07                   |       | 81.50     | 62.43 | 19.07                   | 19.07 | 81.73     | 63.47 | 18.27                   | 18.27 | 79.40     | 59.03 | 20.37                   |       | 20.37     |       |
| <b>SE</b>                        |       |         | 1.22      | 1.68  | 1.55                    |       | 1.76      | 1.70  | 1.73                    | 3.05  | 1.08      | 1.89  | 1.85                    | 3.29  | 1.39      | 0.99  | 2.11                    |       | 3.75      |       |

| Group 8<br>Cmpd E<br>IA, 1x/week |       | Trial # | Force (g) |       | Paw Wt Distribution (g) |       | Force (g) |       | Paw Wt Distribution (g) |       | Force (g) |       | Paw Wt Distribution (g) |       | Force (g) |       | Paw Wt Distribution (g) |       |           |       |
|----------------------------------|-------|---------|-----------|-------|-------------------------|-------|-----------|-------|-------------------------|-------|-----------|-------|-------------------------|-------|-----------|-------|-------------------------|-------|-----------|-------|
| Left                             | Right |         | Per Trial | Mean  | Left                    | Right | Per Trial | Mean  | Left                    | Right | Per Trial | Mean  | Left                    | Right | Per Trial | Mean  | Left                    | Right | Per Trial | Mean  |
| <b>Animal 1</b>                  |       | 1       | 79        | 62    | 17                      |       | 79        | 63    | 16                      |       | 77        | 64    | 13                      |       | 79        | 50    | 29                      |       | 31        | 31.00 |
|                                  |       | 2       | 79        | 64    | 15                      | 15.33 | 78        | 67    | 11                      | 13.67 | 75        | 67    | 8                       | 12.67 | 81        | 50    | 31                      |       |           |       |
|                                  |       | 3       | 76        | 62    | 14                      |       | 78        | 64    | 14                      |       | 79        | 62    | 17                      |       | 83        | 50    | 33                      |       |           |       |
| <b>2</b>                         |       | 1       | 78        | 58    | 20                      |       | 83        | 50    | 33                      |       | 70        | 59    | 11                      |       | 77        | 59    | 18                      |       | 18        | 20.33 |
|                                  |       | 2       | 76        | 58    | 18                      | 19.00 | 82        | 54    | 28                      | 30.00 | 72        | 59    | 13                      | 12.00 | 77        | 55    | 22                      |       |           |       |
|                                  |       | 3       | 82        | 63    | 19                      |       | 83        | 54    | 29                      |       | 71        | 59    | 12                      |       | 78        | 57    | 21                      |       |           |       |
| <b>3</b>                         |       | 1       | 86        | 69    | 17                      |       | 82        | 61    | 21                      |       | 78        | 69    | 9                       |       | 72        | 50    | 22                      |       | 22        | 21.33 |
|                                  |       | 2       | 86        | 70    | 16                      | 16.00 | 80        | 59    | 21                      | 21.00 | 78        | 69    | 9                       | 9.00  | 72        | 50    | 22                      |       |           |       |
|                                  |       | 3       | 86        | 71    | 15                      |       | 80        | 59    | 21                      |       | 78        | 69    | 9                       |       | 71        | 51    | 20                      |       |           |       |
| <b>4</b>                         |       | 1       | 74        | 57    | 17                      |       | 74        | 60    | 14                      |       | 86        | 73    | 13                      |       | 79        | 66    | 13                      |       | 13        | 12.33 |
|                                  |       | 2       | 73        | 58    | 15                      | 18.00 | 76        | 64    | 12                      | 13.00 | 87        | 71    | 16                      | 15.00 | 79        | 67    | 12                      |       |           |       |
|                                  |       | 3       | 77        | 55    | 22                      |       | 74        | 61    | 13                      |       | 88        | 72    | 16                      |       | 79        | 67    | 12                      |       |           |       |
| <b>5</b>                         |       | 1       | 84        | 60    | 24                      |       | 81        | 66    | 15                      |       | 78        | 64    | 14                      |       | 75        | 52    | 23                      |       | 23        | 22.33 |
|                                  |       | 2       | 83        | 60    | 23                      | 23.33 | 81        | 68    | 13                      | 14.00 | 79        | 63    | 16                      | 14.00 | 75        | 54    | 21                      |       |           |       |
|                                  |       | 3       | 82        | 59    | 23                      |       | 80        | 66    | 14                      |       | 76        | 64    | 12                      |       | 77        | 54    | 23                      |       |           |       |
| <b>6</b>                         |       | 1       | 69        | 63    | 6                       |       | 72        | 65    | 7                       |       | 73        | 51    | 22                      |       | 68        | 51    | 17                      |       | 17        | 16.33 |
|                                  |       | 2       | 68        | 64    | 4                       | 5.00  | 72        | 65    | 7                       | 6.33  | 74        | 53    | 21                      | 21.67 | 68        | 52    | 16                      |       |           |       |
|                                  |       | 3       | 68        | 63    | 5                       |       | 72        | 67    | 5                       |       | 74        | 52    | 22                      |       | 69        | 53    | 16                      |       |           |       |
| <b>7</b>                         |       | 1       | 85        | 66    | 19                      |       | 82        | 61    | 21                      |       | 69        | 49    | 20                      |       | 72        | 53    | 19                      |       | 19        | 20.67 |
|                                  |       | 2       | 84        | 61    | 23                      | 21.33 | 82        | 61    | 21                      | 20.67 | 69        | 49    | 20                      | 19.67 | 71        | 51    | 20                      |       |           |       |
|                                  |       | 3       | 83        | 61    | 22                      |       | 82        | 62    | 20                      |       | 69        | 50    | 19                      |       | 75        | 52    | 23                      |       |           |       |
| <b>8</b>                         |       | 1       | 81        | 74    | 7                       |       | 96        | 53    | 43                      |       | 85        | 53    | 32                      |       | 88        | 45    | 43                      |       | 43        | 44.33 |
|                                  |       | 2       | 80        | 71    | 9                       | 7.67  | 96        | 53    | 43                      | 42.33 | 85        | 53    | 32                      | 33.00 | 87        | 44    | 43                      |       |           |       |
|                                  |       | 3       | 79        | 72    | 7                       |       | 96        | 55    | 41                      |       | 86        | 51    | 35                      |       | 89        | 42    | 47                      |       |           |       |
| <b>9</b>                         |       | 1       | 87        | 63    | 24                      |       | 77        | 67    | 10                      |       | 64        | 55    | 9                       |       | 69        | 42    | 27                      |       | 27        | 24.33 |
|                                  |       | 2       | 89        | 63    | 26                      | 24.00 | 76        | 71    | 5                       | 6.33  | 60        | 54    | 6                       | 6.33  | 71        | 45    | 26                      |       |           |       |
|                                  |       | 3       | 84        | 62    | 22                      |       | 74        | 70    | 4                       |       | 61        | 57    | 4                       |       | 67        | 47    | 20                      |       |           |       |
| <b>10</b>                        |       | 1       | 74        | 52    | 22                      |       | 78        | 49    | 29                      |       | 62        | 44    | 18                      |       | 78        | 50    | 28                      |       | 28        | 28.67 |
|                                  |       | 2       | 75        | 51    | 24                      | 23.00 | 80        | 53    | 27                      | 25.67 | 64        | 41    | 23                      | 19.67 | 79        | 50    | 29                      |       |           |       |
|                                  |       | 3       | 75        | 52    | 23                      |       | 78        | 57    | 21                      |       | 62        | 44    | 18                      |       | 79        | 50    | 29                      |       |           |       |
| <b>Mean</b>                      |       |         | 79.40     | 62.13 | 17.27                   |       | 80.13     | 60.83 | 19.30                   | 19.30 | 74.30     | 58.00 | 16.30                   | 16.30 | 76.13     | 51.97 | 24.17                   |       | 24.17     |       |
| <b>SE</b>                        |       |         | 1.05      | 1.08  | 1.18                    |       | 1.16      | 1.10  | 2.00                    | 3.54  | 1.51      | 1.64  | 1.38                    | 2.41  | 1.08      | 1.16  | 1.59                    |       | 2.82      |       |

**Table 75. Individual animal data for MMT/MCLT IA Trial 2 Day 14 data**

| Group 1<br>Vehicle (Saline)<br>IA, 1x/week | Trial # | Day 14 (Pre Tx) |       |                         |       | Day 14 (1hr) |       |                         |       | Day 14 (3hr) |       |                         |       | Day 14 (5hr) |       |                         |       |
|--------------------------------------------|---------|-----------------|-------|-------------------------|-------|--------------|-------|-------------------------|-------|--------------|-------|-------------------------|-------|--------------|-------|-------------------------|-------|
|                                            |         | Force (g)       |       | Paw Wt Distribution (g) |       | Force (g)    |       | Paw Wt Distribution (g) |       | Force (g)    |       | Paw Wt Distribution (g) |       | Force (g)    |       | Paw Wt Distribution (g) |       |
|                                            |         | Left            | Right | Per Trial               | Mean  | Left         | Right | Per Trial               | Mean  | Left         | Right | Per Trial               | Mean  | Left         | Right | Per Trial               | Mean  |
| Animal 1                                   | 1       | 79              | 61    | 18                      |       | 72           | 63    | 9                       |       | 81           | 64    | 17                      |       | 90           | 75    | 15                      |       |
|                                            | 2       | 83              | 62    | 21                      | 20.67 | 73           | 67    | 6                       | 7.67  | 83           | 63    | 20                      | 17.33 | 90           | 74    | 16                      | 16.00 |
|                                            | 3       | 85              | 62    | 23                      |       | 72           | 64    | 8                       |       | 83           | 68    | 15                      |       | 91           | 74    | 17                      |       |
| 2                                          | 1       | 78              | 73    | 5                       |       | 85           | 69    | 16                      |       | 75           | 67    | 8                       |       | 76           | 67    | 9                       |       |
|                                            | 2       | 75              | 72    | 3                       | 4.33  | 81           | 68    | 13                      | 14.67 | 76           | 69    | 7                       | 6.33  | 77           | 68    | 9                       | 10.00 |
|                                            | 3       | 77              | 72    | 5                       |       | 84           | 69    | 15                      |       | 78           | 74    | 4                       |       | 81           | 69    | 12                      |       |
| 3                                          | 1       | 98              | 76    | 22                      |       | 79           | 66    | 13                      |       | 77           | 70    | 7                       |       | 74           | 65    | 9                       |       |
|                                            | 2       | 97              | 73    | 24                      | 25.00 | 78           | 65    | 13                      | 14.00 | 75           | 69    | 6                       | 6.00  | 73           | 63    | 10                      | 8.00  |
|                                            | 3       | 96              | 67    | 29                      |       | 79           | 63    | 16                      |       | 75           | 70    | 5                       |       | 75           | 70    | 5                       |       |
| 4                                          | 1       | 71              | 56    | 15                      |       | 71           | 51    | 20                      |       | 68           | 50    | 18                      |       | 71           | 64    | 7                       |       |
|                                            | 2       | 71              | 57    | 14                      | 14.67 | 72           | 48    | 24                      | 23.00 | 69           | 50    | 19                      | 18.00 | 72           | 65    | 7                       | 7.33  |
|                                            | 3       | 74              | 59    | 15                      |       | 73           | 48    | 25                      |       | 69           | 52    | 17                      |       | 71           | 63    | 8                       |       |
| 5                                          | 1       | 85              | 77    | 8                       |       | 82           | 73    | 9                       |       | 81           | 71    | 10                      |       | 73           | 65    | 8                       |       |
|                                            | 2       | 84              | 77    | 7                       | 8.33  | 82           | 75    | 7                       | 7.33  | 81           | 71    | 10                      | 9.67  | 75           | 65    | 10                      | 8.67  |
|                                            | 3       | 85              | 75    | 10                      |       | 82           | 76    | 6                       |       | 80           | 71    | 9                       |       | 74           | 66    | 8                       |       |
| 6                                          | 1       | 96              | 82    | 14                      |       | 97           | 76    | 21                      |       | 85           | 77    | 8                       |       | 88           | 73    | 15                      |       |
|                                            | 2       | 96              | 85    | 11                      | 13.67 | 96           | 76    | 20                      | 20.00 | 84           | 77    | 7                       | 7.33  | 89           | 68    | 21                      | 17.33 |
|                                            | 3       | 98              | 82    | 16                      |       | 95           | 76    | 19                      |       | 84           | 77    | 7                       |       | 87           | 71    | 16                      |       |
| 7                                          | 1       | 94              | 79    | 15                      |       | 97           | 74    | 23                      |       | 89           | 75    | 14                      |       | 97           | 66    | 31                      |       |
|                                            | 2       | 94              | 78    | 16                      | 16.33 | 95           | 73    | 22                      | 23.00 | 88           | 73    | 15                      | 14.33 | 96           | 68    | 28                      | 28.33 |
|                                            | 3       | 95              | 77    | 18                      |       | 96           | 72    | 24                      |       | 88           | 74    | 14                      |       | 93           | 67    | 26                      |       |
| 8                                          | 1       | 109             | 90    | 19                      |       | 75           | 68    | 7                       |       | 76           | 53    | 23                      |       | 84           | 59    | 25                      |       |
|                                            | 2       | 108             | 92    | 16                      | 16.33 | 77           | 68    | 9                       | 8.67  | 80           | 54    | 26                      | 24.67 | 83           | 59    | 24                      | 25.00 |
|                                            | 3       | 108             | 94    | 14                      |       | 76           | 66    | 10                      |       | 78           | 53    | 25                      |       | 85           | 59    | 26                      |       |
| 9                                          | 1       | 102             | 80    | 22                      |       | 104          | 90    | 14                      |       | 95           | 81    | 14                      |       | 86           | 73    | 13                      |       |
|                                            | 2       | 102             | 81    | 21                      | 20.67 | 110          | 97    | 13                      | 13.00 | 98           | 82    | 16                      | 15.00 | 82           | 75    | 7                       | 8.33  |
|                                            | 3       | 102             | 83    | 19                      |       | 106          | 94    | 12                      |       | 96           | 81    | 15                      |       | 83           | 78    | 5                       |       |
| 10                                         | 1       | 99              | 72    | 27                      |       | 94           | 69    | 25                      |       | 84           | 69    | 15                      |       | 76           | 69    | 7                       |       |
|                                            | 2       | 100             | 73    | 27                      | 26.00 | 94           | 70    | 24                      | 24.67 | 85           | 71    | 14                      | 14.67 | 76           | 71    | 5                       | 5.67  |
|                                            | 3       | 98              | 74    | 24                      |       | 93           | 68    | 25                      |       | 86           | 71    | 15                      |       | 76           | 71    | 5                       |       |
| Mean                                       | 91.30   | 74.70           | 16.60 | 16.60                   | 85.67 | 70.07        | 15.60 | 15.60                   | 81.57 | 68.23        | 13.33 | 13.33                   | 81.47 | 68.00        | 13.47 | 13.47                   |       |
| SE                                         | 2.08    | 1.80            | 1.25  | 2.17                    | 2.08  | 1.99         | 1.20  | 2.11                    | 1.36  | 1.72         | 1.08  | 1.90                    | 1.43  | 0.90         | 1.44  | 2.51                    |       |

| Group 2<br>Clonidine (d7, d14, d18-22)<br>00µg/kg (d7,18-22) or 200µg/kg | Trial # | Day 14 (Pre Tx) |       |                         |       | Day 14 (1hr) |       |                         |       | Day 14 (3hr) |       |                         |       | Day 14 (5hr) |       |                         |       |
|--------------------------------------------------------------------------|---------|-----------------|-------|-------------------------|-------|--------------|-------|-------------------------|-------|--------------|-------|-------------------------|-------|--------------|-------|-------------------------|-------|
|                                                                          |         | Force (g)       |       | Paw Wt Distribution (g) |       | Force (g)    |       | Paw Wt Distribution (g) |       | Force (g)    |       | Paw Wt Distribution (g) |       | Force (g)    |       | Paw Wt Distribution (g) |       |
|                                                                          |         | Left            | Right | Per Trial               | Mean  | Left         | Right | Per Trial               | Mean  | Left         | Right | Per Trial               | Mean  | Left         | Right | Per Trial               | Mean  |
| Animal 1                                                                 | 1       | 100             | 76    | 24                      |       | 76           | 66    | 10                      |       | 71           | 56    | 15                      |       | 93           | 66    | 27                      |       |
|                                                                          | 2       | 100             | 77    | 23                      | 23.00 | 77           | 66    | 11                      | 11.00 | 70           | 56    | 14                      | 14.00 | 93           | 66    | 27                      | 26.67 |
|                                                                          | 3       | 100             | 78    | 22                      |       | 77           | 65    | 12                      |       | 70           | 57    | 13                      |       | 93           | 67    | 26                      |       |
| 2                                                                        | 1       | 80              | 69    | 11                      |       | 97           | 74    | 23                      |       | 90           | 65    | 25                      |       | 83           | 61    | 22                      |       |
|                                                                          | 2       | 81              | 69    | 12                      | 13.33 | 97           | 74    | 23                      | 23.33 | 90           | 66    | 24                      | 24.33 | 84           | 61    | 23                      | 22.00 |
|                                                                          | 3       | 81              | 64    | 17                      |       | 98           | 74    | 24                      |       | 90           | 66    | 24                      |       | 83           | 62    | 21                      |       |
| 3                                                                        | 1       | 94              | 87    | 7                       |       | 77           | 67    | 10                      |       | 93           | 75    | 18                      |       | 83           | 77    | 6                       |       |
|                                                                          | 2       | 91              | 84    | 7                       | 7.00  | 78           | 68    | 10                      | 10.67 | 94           | 78    | 16                      | 15.33 | 83           | 77    | 6                       | 5.67  |
|                                                                          | 3       | 91              | 84    | 7                       |       | 78           | 66    | 12                      |       | 92           | 80    | 12                      |       | 82           | 77    | 5                       |       |
| 4                                                                        | 1       | 74              | 65    | 9                       |       | 82           | 59    | 23                      |       | 89           | 79    | 10                      |       | 87           | 80    | 7                       |       |
|                                                                          | 2       | 75              | 67    | 8                       | 8.00  | 82           | 60    | 22                      | 22.67 | 89           | 80    | 9                       | 9.33  | 89           | 80    | 9                       | 8.00  |
|                                                                          | 3       | 73              | 66    | 7                       |       | 83           | 60    | 23                      |       | 89           | 80    | 9                       |       | 88           | 80    | 8                       |       |
| 5                                                                        | 1       | 91              | 78    | 13                      |       | 96           | 89    | 7                       |       | 100          | 89    | 11                      |       | 113          | 80    | 33                      |       |
|                                                                          | 2       | 93              | 78    | 15                      | 15.00 | 95           | 88    | 10                      | 7.33  | 101          | 89    | 12                      | 11.00 | 113          | 81    | 32                      | 32.67 |
|                                                                          | 3       | 94              | 77    | 17                      |       | 96           | 88    | 8                       |       | 98           | 88    | 10                      |       | 113          | 80    | 33                      |       |
| 6                                                                        | 1       | 97              | 77    | 20                      |       | 96           | 81    | 15                      |       | 84           | 69    | 15                      |       | 102          | 79    | 23                      |       |
|                                                                          | 2       | 96              | 72    | 24                      | 21.00 | 96           | 80    | 16                      | 14.00 | 85           | 70    | 15                      | 15.67 | 102          | 79    | 23                      | 24.33 |
|                                                                          | 3       | 98              | 79    | 19                      |       | 96           | 85    | 11                      |       | 87           | 70    | 17                      |       | 105          | 78    | 27                      |       |
| 7                                                                        | 1       | 84              | 66    | 18                      |       | 84           | 79    | 5                       |       | 89           | 84    | 5                       |       | 93           | 88    | 5                       |       |
|                                                                          | 2       | 84              | 65    | 19                      | 18.33 | 84           | 79    | 5                       | 5.00  | 88           | 84    | 4                       | 4.33  | 93           | 87    | 6                       | 5.67  |
|                                                                          | 3       | 82              | 64    | 18                      |       | 85           | 80    | 5                       |       | 90           | 86    | 4                       |       | 95           | 89    | 6                       |       |
| 8                                                                        | 1       | 101             | 92    | 9                       |       | 84           | 65    | 19                      |       | 87           | 74    | 13                      |       | 99           | 60    | 39                      |       |
|                                                                          | 2       | 100             | 84    | 16                      | 12.67 | 83           | 65    | 18                      | 18.00 | 87           | 74    | 13                      | 13.00 | 99           | 60    | 39                      | 39.00 |
|                                                                          | 3       | 107             | 94    | 13                      |       | 83           | 66    | 17                      |       | 86           | 73    | 13                      |       | 99           | 60    | 39                      |       |
| 9                                                                        | 1       | 98              | 90    | 8                       |       | 73           | 59    | 14                      |       | 113          | 102   | 11                      |       | 100          | 94    | 6                       |       |
|                                                                          | 2       | 98              | 84    | 14                      | 13.67 | 72           | 59    | 13                      | 13.33 | 111          | 102   | 9                       | 8.33  | 100          | 94    | 6                       | 6.00  |
|                                                                          | 3       | 103             | 84    | 19                      |       | 72           | 59    | 13                      |       | 107          | 102   | 5                       |       | 100          | 94    | 6                       |       |
| 10                                                                       | 1       | 81              | 70    | 11                      |       | 97           | 79    | 18                      |       | 90           | 74    | 16                      |       | 92           | 67    | 25                      |       |
|                                                                          | 2       | 83              | 69    | 14                      | 13.67 | 97           | 80    | 17                      | 17.00 | 90           | 74    | 16                      | 16.00 | 91           | 67    | 24                      | 23.67 |
|                                                                          | 3       | 83              | 67    | 16                      |       | 97           | 81    | 16                      |       | 90           | 74    | 16                      |       | 89           | 67    | 22                      |       |
| Mean                                                                     | 90.43   | 75.87           | 14.57 | 14.57                   | 86.27 | 72.03        | 14.23 | 14.23                   | 90.33 | 77.20        | 13.13 | 13.13                   | 94.63 | 75.27        | 19.37 | 19.37                   |       |
| SE                                                                       | 1.74    | 1.64            | 0.99  | 1.61                    | 1.67  | 1.79         | 1.08  | 1.92                    | 1.81  | 2.25         | 0.98  | 1.72                    | 1.66  | 1.99         | 2.16  | 3.87                    |       |

| Group 3<br>Cmpd A1<br>IA, 1x/week |       | Trial # | Force (g)    |              | Paw Wt Distribution (g) |              | Force (g)    |              | Paw Wt Distribution (g) |              | Force (g)    |              | Paw Wt Distribution (g) |              | Force (g)    |              | Paw Wt Distribution (g) |              |           |
|-----------------------------------|-------|---------|--------------|--------------|-------------------------|--------------|--------------|--------------|-------------------------|--------------|--------------|--------------|-------------------------|--------------|--------------|--------------|-------------------------|--------------|-----------|
| Left                              | Right |         | Per Trial    | Mean         | Left                    | Right        | Per Trial    | Mean         | Left                    | Right        | Per Trial    | Mean         | Left                    | Right        | Per Trial    | Mean         | Left                    | Right        | Per Trial |
| <b>Animal 1</b>                   |       | 1       | 97           | 92           | 5                       |              | 87           | 79           | 8                       |              | 89           | 71           | 18                      |              | 88           | 66           | 22                      |              | 22.33     |
|                                   |       | 2       | 96           | 89           | 7                       | <b>6.00</b>  | 89           | 81           | 8                       | <b>8.00</b>  | 89           | 70           | 19                      |              | 89           | 66           | 23                      |              |           |
|                                   |       | 3       | 95           | 89           | 6                       |              | 88           | 80           | 8                       |              | 88           | 72           | 16                      |              | 87           | 65           | 22                      |              |           |
| <b>2</b>                          |       | 1       | 93           | 80           | 13                      |              | 101          | 79           | 22                      |              | 82           | 71           | 11                      |              | 70           | 57           | 13                      |              | 13.33     |
|                                   |       | 2       | 95           | 85           | 10                      | <b>15.00</b> | 101          | 78           | 23                      | <b>22.00</b> | 81           | 72           | 9                       | <b>8.67</b>  | 70           | 57           | 13                      |              |           |
|                                   |       | 3       | 99           | 77           | 22                      |              | 100          | 79           | 21                      |              | 80           | 74           | 6                       |              | 72           | 58           | 14                      |              |           |
| <b>3</b>                          |       | 1       | 97           | 77           | 20                      |              | 102          | 74           | 28                      |              | 83           | 59           | 24                      |              | 73           | 53           | 20                      |              | 19.33     |
|                                   |       | 2       | 99           | 77           | 22                      | <b>22.33</b> | 102          | 75           | 27                      | <b>27.67</b> | 82           | 59           | 23                      | <b>23.33</b> | 72           | 54           | 18                      |              |           |
|                                   |       | 3       | 98           | 73           | 25                      |              | 103          | 75           | 28                      |              | 84           | 61           | 23                      |              | 73           | 53           | 20                      |              |           |
| <b>4</b>                          |       | 1       | 71           | 63           | 8                       |              | 106          | 77           | 29                      |              | 93           | 50           | 43                      |              | 78           | 65           | 13                      |              | 12.67     |
|                                   |       | 2       | 71           | 64           | 7                       | <b>7.67</b>  | 107          | 77           | 30                      | <b>30.00</b> | 93           | 50           | 43                      | <b>43.00</b> | 78           | 65           | 13                      |              |           |
|                                   |       | 3       | 76           | 68           | 8                       |              | 107          | 76           | 31                      |              | 94           | 51           | 43                      |              | 78           | 66           | 12                      |              |           |
| <b>5</b>                          |       | 1       | 94           | 74           | 20                      |              | 105          | 82           | 23                      |              | 84           | 71           | 13                      |              | 89           | 63           | 26                      |              | 24.33     |
|                                   |       | 2       | 94           | 75           | 19                      | <b>19.67</b> | 107          | 79           | 28                      | <b>26.33</b> | 84           | 71           | 13                      | <b>12.00</b> | 90           | 63           | 27                      |              |           |
|                                   |       | 3       | 94           | 74           | 20                      |              | 108          | 80           | 28                      |              | 83           | 73           | 10                      |              | 87           | 67           | 20                      |              |           |
| <b>6</b>                          |       | 1       | 90           | 62           | 28                      |              | 92           | 68           | 24                      |              | 82           | 54           | 28                      |              | 68           | 59           | 9                       |              | 10.33     |
|                                   |       | 2       | 93           | 63           | 30                      | <b>26.67</b> | 97           | 67           | 30                      | <b>27.00</b> | 85           | 56           | 29                      | <b>27.67</b> | 70           | 61           | 9                       |              |           |
|                                   |       | 3       | 89           | 67           | 22                      |              | 99           | 72           | 27                      |              | 82           | 56           | 26                      |              | 72           | 59           | 13                      |              |           |
| <b>7</b>                          |       | 1       | 88           | 79           | 9                       |              | 109          | 79           | 30                      |              | 94           | 76           | 18                      |              | 82           | 50           | 32                      |              | 31.67     |
|                                   |       | 2       | 88           | 80           | 8                       | <b>8.67</b>  | 105          | 79           | 26                      | <b>27.33</b> | 92           | 75           | 17                      | <b>18.67</b> | 82           | 50           | 32                      |              |           |
|                                   |       | 3       | 87           | 78           | 9                       |              | 105          | 79           | 26                      |              | 96           | 75           | 21                      |              | 82           | 51           | 31                      |              |           |
| <b>8</b>                          |       | 1       | 94           | 85           | 9                       |              | 98           | 82           | 16                      |              | 84           | 69           | 15                      |              | 81           | 49           | 32                      |              | 31.67     |
|                                   |       | 2       | 93           | 84           | 9                       | <b>9.33</b>  | 99           | 83           | 16                      | <b>15.33</b> | 85           | 68           | 17                      | <b>16.00</b> | 81           | 49           | 32                      |              |           |
|                                   |       | 3       | 94           | 84           | 10                      |              | 98           | 84           | 14                      |              | 84           | 68           | 16                      |              | 80           | 49           | 31                      |              |           |
| <b>9</b>                          |       | 1       | 84           | 69           | 15                      |              | 73           | 60           | 13                      |              | 87           | 62           | 25                      |              | 74           | 56           | 18                      |              | 18.00     |
|                                   |       | 2       | 84           | 70           | 14                      | <b>14.33</b> | 73           | 60           | 13                      | <b>12.67</b> | 86           | 63           | 23                      | <b>23.67</b> | 73           | 56           | 17                      |              |           |
|                                   |       | 3       | 83           | 69           | 14                      |              | 73           | 61           | 12                      |              | 90           | 67           | 23                      |              | 75           | 56           | 19                      |              |           |
| <b>10</b>                         |       | 1       | 75           | 66           | 9                       |              | 87           | 79           | 8                       |              | 78           | 61           | 17                      |              | 64           | 52           | 12                      |              | 11.67     |
|                                   |       | 2       | 75           | 63           | 12                      | <b>10.00</b> | 88           | 79           | 9                       | <b>9.00</b>  | 79           | 61           | 18                      | <b>17.67</b> | 64           | 53           | 11                      |              |           |
|                                   |       | 3       | 75           | 66           | 9                       |              | 89           | 79           | 10                      |              | 79           | 61           | 18                      |              | 66           | 54           | 12                      |              |           |
| <b>Mean</b>                       |       |         | <b>88.70</b> | <b>74.73</b> | <b>13.97</b>            | <b>13.97</b> | <b>96.60</b> | <b>76.07</b> | <b>20.53</b>            | <b>20.53</b> | <b>85.73</b> | <b>64.90</b> | <b>20.83</b>            | <b>20.83</b> | <b>76.93</b> | <b>57.40</b> | <b>19.53</b>            | <b>19.53</b> |           |
| <b>SE</b>                         |       |         | <b>1.59</b>  | <b>1.60</b>  | <b>1.29</b>             | <b>1.29</b>  | <b>1.92</b>  | <b>1.19</b>  | <b>1.51</b>             | <b>2.67</b>  | <b>0.91</b>  | <b>1.46</b>  | <b>1.70</b>             | <b>3.03</b>  | <b>1.41</b>  | <b>1.10</b>  | <b>1.41</b>             | <b>2.49</b>  |           |

| Group 4<br>Cmpd B<br>IA, 1x/week |       | Trial # | Force (g)    |              | Paw Wt Distribution (g) |              | Force (g)    |              | Paw Wt Distribution (g) |              | Force (g)    |              | Paw Wt Distribution (g) |              | Force (g)    |              | Paw Wt Distribution (g) |              |           |
|----------------------------------|-------|---------|--------------|--------------|-------------------------|--------------|--------------|--------------|-------------------------|--------------|--------------|--------------|-------------------------|--------------|--------------|--------------|-------------------------|--------------|-----------|
| Left                             | Right |         | Per Trial    | Mean         | Left                    | Right        | Per Trial    | Mean         | Left                    | Right        | Per Trial    | Mean         | Left                    | Right        | Per Trial    | Mean         | Left                    | Right        | Per Trial |
| <b>Animal 1</b>                  |       | 1       | 98           | 74           | 24                      |              | 87           | 77           | 10                      |              | 81           | 50           | 31                      |              | 86           | 64           | 22                      |              | 21.33     |
|                                  |       | 2       | 97           | 75           | 22                      | <b>21.67</b> | 86           | 79           | 7                       | <b>7.67</b>  | 84           | 52           | 32                      | <b>28.67</b> | 88           | 65           | 23                      |              |           |
|                                  |       | 3       | 95           | 76           | 19                      |              | 84           | 78           | 6                       |              | 75           | 52           | 23                      |              | 81           | 62           | 19                      |              |           |
| <b>2</b>                         |       | 1       | 77           | 65           | 12                      |              | 83           | 61           | 22                      |              | 68           | 56           | 12                      |              | 78           | 55           | 23                      |              | 22.67     |
|                                  |       | 2       | 77           | 65           | 12                      | <b>12.67</b> | 85           | 63           | 22                      | <b>21.33</b> | 68           | 56           | 12                      | <b>14.00</b> | 78           | 55           | 23                      |              |           |
|                                  |       | 3       | 77           | 63           | 14                      |              | 87           | 67           | 20                      |              | 74           | 56           | 18                      |              | 76           | 54           | 22                      |              |           |
| <b>3</b>                         |       | 1       | 95           | 74           | 21                      |              | 70           | 62           | 8                       |              | 76           | 64           | 12                      |              | 73           | 67           | 6                       |              | 6.33      |
|                                  |       | 2       | 95           | 75           | 20                      | <b>20.00</b> | 70           | 62           | 8                       | <b>7.00</b>  | 73           | 66           | 7                       | <b>8.67</b>  | 74           | 68           | 6                       |              |           |
|                                  |       | 3       | 94           | 75           | 19                      |              | 69           | 64           | 5                       |              | 73           | 66           | 7                       |              | 74           | 67           | 7                       |              |           |
| <b>4</b>                         |       | 1       | 85           | 56           | 29                      |              | 83           | 55           | 28                      |              | 75           | 69           | 6                       |              | 71           | 53           | 18                      |              | 18.67     |
|                                  |       | 2       | 85           | 57           | 28                      | <b>28.67</b> | 83           | 55           | 28                      | <b>28.00</b> | 74           | 69           | 5                       | <b>5.67</b>  | 71           | 52           | 19                      |              |           |
|                                  |       | 3       | 86           | 57           | 29                      |              | 85           | 57           | 28                      |              | 74           | 68           | 6                       |              | 71           | 52           | 19                      |              |           |
| <b>5</b>                         |       | 1       | 86           | 82           | 4                       |              | 83           | 68           | 15                      |              | 79           | 62           | 17                      |              | 72           | 67           | 5                       |              | 6.00      |
|                                  |       | 2       | 86           | 82           | 4                       | <b>3.67</b>  | 82           | 69           | 13                      | <b>13.00</b> | 77           | 60           | 17                      | <b>16.33</b> | 73           | 66           | 7                       |              |           |
|                                  |       | 3       | 85           | 82           | 3                       |              | 83           | 72           | 11                      |              | 76           | 61           | 15                      |              | 72           | 66           | 6                       |              |           |
| <b>6</b>                         |       | 1       | 78           | 66           | 12                      |              | 77           | 76           | 1                       |              | 90           | 82           | 8                       |              | 82           | 70           | 12                      |              | 16.00     |
|                                  |       | 2       | 79           | 65           | 14                      | <b>11.33</b> | 78           | 77           | 1                       | <b>0.67</b>  | 89           | 82           | 7                       | <b>7.67</b>  | 82           | 69           | 13                      |              |           |
|                                  |       | 3       | 78           | 70           | 8                       |              | 78           | 78           | 0                       |              | 89           | 81           | 8                       |              | 87           | 64           | 23                      |              |           |
| <b>7</b>                         |       | 1       | 87           | 73           | 14                      |              | 82           | 75           | 7                       |              | 90           | 61           | 29                      |              | 82           | 64           | 18                      |              | 18.33     |
|                                  |       | 2       | 83           | 75           | 8                       | <b>12.67</b> | 82           | 79           | 3                       | <b>7.67</b>  | 87           | 61           | 26                      | <b>28.33</b> | 82           | 63           | 19                      |              |           |
|                                  |       | 3       | 89           | 73           | 16                      |              | 86           | 73           | 13                      |              | 91           | 61           | 30                      |              | 82           | 64           | 18                      |              |           |
| <b>8</b>                         |       | 1       | 86           | 79           | 7                       |              | 89           | 80           | 9                       |              | 86           | 67           | 19                      |              | 88           | 73           | 15                      |              | 15.67     |
|                                  |       | 2       | 85           | 80           | 5                       | <b>5.67</b>  | 93           | 70           | 23                      | <b>15.00</b> | 85           | 68           | 17                      | <b>17.67</b> | 88           | 73           | 15                      |              |           |
|                                  |       | 3       | 86           | 81           | 5                       |              | 93           | 80           | 13                      |              | 85           | 68           | 17                      |              | 88           | 71           | 17                      |              |           |
| <b>9</b>                         |       | 1       | 97           | 81           | 16                      |              | 108          | 97           | 11                      |              | 89           | 73           | 16                      |              | 84           | 76           | 8                       |              | 8.00      |
|                                  |       | 2       | 98           | 83           | 15                      | <b>14.00</b> | 108          | 96           | 12                      | <b>11.67</b> | 89           | 73           | 16                      | <b>14.00</b> | 84           | 76           | 8                       |              |           |
|                                  |       | 3       | 95           | 84           | 11                      |              | 107          | 95           | 12                      |              | 83           | 73           | 10                      |              | 85           | 77           | 8                       |              |           |
| <b>10</b>                        |       | 1       | 95           | 74           | 21                      |              | 98           | 88           | 10                      |              | 83           | 70           | 13                      |              | 84           | 72           | 12                      |              | 10.00     |
|                                  |       | 2       | 96           | 77           | 19                      | <b>19.67</b> | 95           | 88           | 7                       | <b>8.67</b>  | 83           | 70           | 13                      | <b>13.67</b> | 84           | 73           | 11                      |              |           |
|                                  |       | 3       | 91           | 72           | 19                      |              | 96           | 87           | 9                       |              | 86           | 71           | 15                      |              | 86           | 79           | 7                       |              |           |
| <b>Mean</b>                      |       |         | <b>88.03</b> | <b>73.03</b> | <b>15.00</b>            | <b>15.00</b> | <b>86.33</b> | <b>74.27</b> | <b>12.07</b>            | <b>12.07</b> | <b>81.07</b> | <b>65.60</b> | <b>15.47</b>            | <b>15.47</b> | <b>80.20</b> | <b>65.90</b> | <b>14.30</b>            | <b>14.30</b> |           |
| <b>SE</b>                        |       |         | <b>1.29</b>  | <b>1.47</b>  | <b>1.38</b>             | <b>2.40</b>  | <b>1.84</b>  | <b>2.15</b>  | <b>1.46</b>             | <b>2.48</b>  | <b>1.27</b>  | <b>1.54</b>  | <b>1.44</b>             | <b>2.49</b>  | <b>1.10</b>  | <b>1.41</b>  | <b>1.15</b>             | <b>1.97</b>  |           |





**Table 76. Individual animal data for MMT/MCLT IA Trial 2 Day 21 data**

| Group 1<br>Vehicle (Saline)<br>IA, 1x/week | Trial # | Day 21 (Pre Tx) |       |                         |       | Day 21 (1hr) |       |                         |       | Day 21 (3hr) |       |                         |       | Day 21 (5hr) |       |                         |       |
|--------------------------------------------|---------|-----------------|-------|-------------------------|-------|--------------|-------|-------------------------|-------|--------------|-------|-------------------------|-------|--------------|-------|-------------------------|-------|
|                                            |         | Force (g)       |       | Paw Wt Distribution (g) |       | Force (g)    |       | Paw Wt Distribution (g) |       | Force (g)    |       | Paw Wt Distribution (g) |       | Force (g)    |       | Paw Wt Distribution (g) |       |
|                                            |         | Left            | Right | Per Trial               | Mean  | Left         | Right | Per Trial               | Mean  | Left         | Right | Per Trial               | Mean  | Left         | Right | Per Trial               | Mean  |
| Animal 1                                   | 1       | 86              | 75    | 11                      |       | 94           | 66    | 28                      |       | 86           | 60    | 26                      |       | 76           | 60    | 16                      |       |
|                                            | 2       | 85              | 76    | 9                       | 10.33 | 98           | 69    | 29                      | 29.33 | 85           | 61    | 24                      | 25.00 | 78           | 61    | 17                      | 16.33 |
|                                            | 3       | 86              | 75    | 11                      |       | 99           | 68    | 31                      |       | 86           | 61    | 25                      |       | 77           | 61    | 16                      |       |
| 2                                          | 1       | 91              | 86    | 5                       |       | 94           | 76    | 18                      |       | 83           | 75    | 8                       |       | 81           | 69    | 12                      |       |
|                                            | 2       | 89              | 86    | 3                       | 5.00  | 95           | 76    | 19                      | 17.00 | 83           | 75    | 8                       | 8.33  | 80           | 69    | 11                      | 11.33 |
|                                            | 3       | 90              | 83    | 7                       |       | 95           | 81    | 14                      |       | 83           | 74    | 9                       |       | 81           | 70    | 11                      |       |
| 3                                          | 1       | 95              | 86    | 9                       |       | 97           | 67    | 30                      |       | 86           | 56    | 10                      |       | 91           | 70    | 21                      |       |
|                                            | 2       | 93              | 86    | 7                       | 7.67  | 98           | 73    | 25                      | 26.67 | 67           | 59    | 8                       | 9.00  | 91           | 71    | 20                      | 20.33 |
|                                            | 3       | 94              | 87    | 7                       |       | 98           | 73    | 25                      |       | 70           | 61    | 9                       |       | 91           | 71    | 20                      |       |
| 4                                          | 1       | 77              | 56    | 21                      |       | 70           | 62    | 8                       |       | 65           | 57    | 8                       |       | 83           | 57    | 26                      |       |
|                                            | 2       | 80              | 58    | 22                      | 21.33 | 72           | 65    | 7                       | 7.33  | 68           | 59    | 9                       | 8.67  | 82           | 56    | 26                      | 26.67 |
|                                            | 3       | 78              | 57    | 21                      |       | 72           | 65    | 7                       |       | 67           | 58    | 9                       |       | 83           | 55    | 28                      |       |
| 5                                          | 1       | 93              | 84    | 9                       |       | 81           | 77    | 4                       |       | 73           | 66    | 7                       |       | 83           | 71    | 12                      |       |
|                                            | 2       | 93              | 88    | 5                       | 7.00  | 84           | 77    | 7                       | 6.67  | 77           | 68    | 9                       | 7.00  | 83           | 73    | 10                      | 10.67 |
|                                            | 3       | 94              | 87    | 7                       |       | 84           | 75    | 9                       |       | 74           | 69    | 5                       |       | 84           | 74    | 10                      |       |
| 6                                          | 1       | 90              | 83    | 7                       |       | 103          | 70    | 33                      |       | 86           | 63    | 23                      |       | 75           | 57    | 18                      |       |
|                                            | 2       | 92              | 82    | 10                      | 10.00 | 102          | 69    | 33                      | 33.33 | 85           | 64    | 21                      | 22.00 | 75           | 57    | 18                      | 18.33 |
|                                            | 3       | 92              | 79    | 13                      |       | 103          | 69    | 34                      |       | 86           | 64    | 22                      |       | 78           | 59    | 19                      |       |
| 7                                          | 1       | 104             | 77    | 27                      |       | 86           | 74    | 12                      |       | 90           | 78    | 12                      |       | 92           | 80    | 12                      |       |
|                                            | 2       | 105             | 77    | 28                      | 27.33 | 82           | 73    | 9                       | 10.00 | 90           | 78    | 12                      | 11.67 | 91           | 80    | 11                      | 11.67 |
|                                            | 3       | 104             | 77    | 27                      |       | 85           | 76    | 9                       |       | 90           | 79    | 11                      |       | 92           | 80    | 12                      |       |
| 8                                          | 1       | 95              | 78    | 17                      |       | 77           | 70    | 7                       |       | 87           | 67    | 20                      |       | 79           | 58    | 21                      |       |
|                                            | 2       | 94              | 80    | 14                      | 15.00 | 75           | 70    | 5                       | 5.67  | 87           | 62    | 25                      | 21.67 | 80           | 57    | 23                      | 21.33 |
|                                            | 3       | 91              | 77    | 14                      |       | 76           | 71    | 5                       |       | 87           | 67    | 20                      |       | 76           | 56    | 20                      |       |
| 9                                          | 1       | 89              | 78    | 11                      |       | 88           | 80    | 8                       |       | 76           | 67    | 9                       |       | 76           | 67    | 9                       |       |
|                                            | 2       | 87              | 77    | 10                      | 10.33 | 91           | 82    | 9                       | 8.00  | 76           | 67    | 9                       | 8.67  | 76           | 70    | 6                       | 7.00  |
|                                            | 3       | 86              | 76    | 10                      |       | 87           | 80    | 7                       |       | 75           | 67    | 8                       |       | 75           | 69    | 6                       |       |
| 10                                         | 1       | 72              | 68    | 4                       |       | 74           | 72    | 2                       |       | 77           | 64    | 13                      |       | 78           | 67    | 11                      |       |
|                                            | 2       | 74              | 70    | 4                       | 4.00  | 76           | 73    | 3                       | 3.00  | 77           | 64    | 13                      | 13.00 | 78           | 68    | 10                      | 10.67 |
|                                            | 3       | 74              | 70    | 4                       |       | 77           | 73    | 4                       |       | 77           | 64    | 13                      |       | 79           | 68    | 11                      |       |
| Mean                                       | 89.10   | 77.30           | 11.80 | 11.80                   | 87.10 | 72.40        | 14.70 | 14.70                   | 79.30 | 65.80        | 13.50 | 13.50                   | 81.47 | 66.03        | 15.43 | 15.43                   |       |
| SE                                         | 1.54    | 1.59            | 1.33  | 2.35                    | 1.91  | 0.92         | 1.98  | 3.52                    | 1.45  | 1.17         | 1.21  | 2.14                    | 1.03  | 1.40         | 1.10  | 1.95                    |       |

| Group 2<br>Clonidine (d7, d14, d18-22)<br>00µg/kg (d7,18-22) or 200µg/kg | Trial # | Day 21 (Pre Tx) |       |                         |       | Day 21 (1hr) |       |                         |       | Day 21 (3hr) |       |                         |       | Day 21 (5hr) |       |                         |       |
|--------------------------------------------------------------------------|---------|-----------------|-------|-------------------------|-------|--------------|-------|-------------------------|-------|--------------|-------|-------------------------|-------|--------------|-------|-------------------------|-------|
|                                                                          |         | Force (g)       |       | Paw Wt Distribution (g) |       | Force (g)    |       | Paw Wt Distribution (g) |       | Force (g)    |       | Paw Wt Distribution (g) |       | Force (g)    |       | Paw Wt Distribution (g) |       |
|                                                                          |         | Left            | Right | Per Trial               | Mean  | Left         | Right | Per Trial               | Mean  | Left         | Right | Per Trial               | Mean  | Left         | Right | Per Trial               | Mean  |
| Animal 1                                                                 | 1       | 81              | 63    | 18                      |       | 83           | 64    | 19                      |       | 76           | 69    | 7                       |       | 92           | 68    | 24                      |       |
|                                                                          | 2       | 80              | 63    | 17                      | 17.33 | 83           | 64    | 19                      | 19.00 | 76           | 69    | 7                       | 6.67  | 94           | 69    | 25                      | 25.33 |
|                                                                          | 3       | 81              | 64    | 17                      |       | 83           | 64    | 19                      |       | 78           | 72    | 6                       |       | 94           | 67    | 27                      |       |
| 2                                                                        | 1       | 97              | 68    | 29                      |       | 103          | 84    | 19                      |       | 98           | 72    | 26                      |       | 83           | 71    | 12                      |       |
|                                                                          | 2       | 100             | 69    | 31                      | 30.33 | 102          | 84    | 18                      | 18.00 | 99           | 72    | 27                      | 26.33 | 83           | 71    | 12                      | 11.67 |
|                                                                          | 3       | 100             | 69    | 31                      |       | 100          | 83    | 17                      |       | 98           | 72    | 26                      |       | 83           | 72    | 11                      |       |
| 3                                                                        | 1       | 86              | 67    | 19                      |       | 94           | 67    | 27                      |       | 84           | 70    | 14                      |       | 96           | 65    | 31                      |       |
|                                                                          | 2       | 84              | 65    | 19                      | 17.67 | 92           | 65    | 27                      | 27.33 | 85           | 70    | 15                      | 13.33 | 97           | 67    | 30                      | 29.33 |
|                                                                          | 3       | 86              | 71    | 15                      |       | 94           | 66    | 28                      |       | 83           | 72    | 11                      |       | 98           | 71    | 27                      |       |
| 4                                                                        | 1       | 81              | 62    | 19                      |       | 87           | 63    | 24                      |       | 80           | 72    | 8                       |       | 92           | 87    | 5                       |       |
|                                                                          | 2       | 78              | 61    | 17                      | 18.67 | 86           | 63    | 23                      | 23.00 | 79           | 72    | 7                       | 7.33  | 95           | 86    | 9                       | 9.67  |
|                                                                          | 3       | 83              | 63    | 20                      |       | 86           | 64    | 22                      |       | 80           | 73    | 7                       |       | 98           | 83    | 15                      |       |
| 5                                                                        | 1       | 89              | 60    | 29                      |       | 107          | 88    | 19                      |       | 98           | 85    | 13                      |       | 106          | 90    | 16                      |       |
|                                                                          | 2       | 89              | 62    | 27                      | 27.67 | 105          | 88    | 17                      | 17.67 | 98           | 85    | 13                      | 12.33 | 105          | 91    | 14                      | 14.33 |
|                                                                          | 3       | 88              | 61    | 27                      |       | 105          | 88    | 17                      |       | 97           | 86    | 11                      |       | 103          | 90    | 13                      |       |
| 6                                                                        | 1       | 82              | 75    | 7                       |       | 98           | 83    | 15                      |       | 87           | 69    | 18                      |       | 99           | 76    | 23                      |       |
|                                                                          | 2       | 80              | 72    | 8                       | 7.33  | 96           | 84    | 12                      | 13.33 | 87           | 69    | 18                      | 18.33 | 98           | 74    | 24                      | 23.67 |
|                                                                          | 3       | 79              | 72    | 7                       |       | 97           | 84    | 13                      |       | 87           | 68    | 19                      |       | 97           | 73    | 24                      |       |
| 7                                                                        | 1       | 90              | 77    | 13                      |       | 91           | 81    | 10                      |       | 104          | 89    | 15                      |       | 87           | 70    | 17                      |       |
|                                                                          | 2       | 93              | 80    | 13                      | 13.67 | 92           | 83    | 9                       | 9.00  | 104          | 86    | 18                      | 16.33 | 88           | 73    | 15                      | 15.33 |
|                                                                          | 3       | 93              | 78    | 15                      |       | 91           | 83    | 8                       |       | 103          | 87    | 16                      |       | 86           | 72    | 14                      |       |
| 8                                                                        | 1       | 83              | 70    | 13                      |       | 80           | 72    | 8                       |       | 72           | 58    | 14                      |       | 78           | 60    | 18                      |       |
|                                                                          | 2       | 84              | 73    | 11                      | 11.33 | 80           | 72    | 8                       | 8.00  | 73           | 58    | 15                      | 14.33 | 77           | 61    | 16                      | 17.00 |
|                                                                          | 3       | 84              | 74    | 10                      |       | 80           | 72    | 8                       |       | 73           | 59    | 14                      |       | 78           | 61    | 17                      |       |
| 9                                                                        | 1       | 81              | 63    | 18                      |       | 98           | 79    | 19                      |       | 94           | 72    | 22                      |       | 85           | 68    | 17                      |       |
|                                                                          | 2       | 79              | 64    | 15                      | 18.33 | 98           | 80    | 18                      | 18.33 | 94           | 71    | 23                      | 21.67 | 85           | 68    | 17                      | 17.00 |
|                                                                          | 3       | 82              | 60    | 22                      |       | 97           | 79    | 18                      |       | 91           | 71    | 20                      |       | 85           | 68    | 17                      |       |
| 10                                                                       | 1       | 86              | 66    | 20                      |       | 81           | 66    | 15                      |       | 99           | 74    | 25                      |       | 94           | 67    | 27                      |       |
|                                                                          | 2       | 82              | 68    | 14                      | 15.67 | 80           | 66    | 14                      | 15.00 | 98           | 73    | 25                      | 25.00 | 92           | 65    | 27                      | 27.67 |
|                                                                          | 3       | 82              | 69    | 13                      |       | 81           | 65    | 16                      |       | 99           | 74    | 25                      |       | 95           | 66    | 29                      |       |
| Mean                                                                     | 85.43   | 67.63           | 17.80 | 17.80                   | 91.67 | 74.80        | 16.87 | 16.87                   | 89.13 | 72.97        | 16.17 | 16.17                   | 91.43 | 72.33        | 19.10 | 19.10                   |       |
| SE                                                                       | 1.11    | 1.03            | 1.25  | 2.18                    | 1.59  | 1.69         | 1.05  | 1.86                    | 1.88  | 1.46         | 1.20  | 2.14                    | 1.44  | 1.61         | 1.25  | 2.18                    |       |

| Group 3<br>Cmpd A1<br>IA, 1x/week |       | Trial # | Force (g)    |              | Paw Wt Distribution (g) |              | Force (g)    |      | Paw Wt Distribution (g) |              | Force (g)    |              | Paw Wt Distribution (g) |       | Force (g)    |              | Paw Wt Distribution (g) |              |           |              |              |              |              |              |
|-----------------------------------|-------|---------|--------------|--------------|-------------------------|--------------|--------------|------|-------------------------|--------------|--------------|--------------|-------------------------|-------|--------------|--------------|-------------------------|--------------|-----------|--------------|--------------|--------------|--------------|--------------|
| Left                              | Right |         | Per Trial    | Mean         | Left                    | Right        | Per Trial    | Mean | Left                    | Right        | Per Trial    | Mean         | Left                    | Right | Per Trial    | Mean         | Left                    | Right        | Per Trial | Mean         |              |              |              |              |
| <b>Animal 1</b>                   |       | 1       | 100          | 88           | 12                      |              |              |      | 112                     | 91           | 21           |              |                         |       | 92           | 66           | 26                      |              |           | 84           | 59           | 25           |              |              |
|                                   |       | 2       | 99           | 86           | 13                      |              | <b>12.00</b> |      | 112                     | 94           | 18           |              | <b>20.00</b>            |       | 89           | 64           | 25                      |              |           | 83           | 59           | 24           |              | <b>24.33</b> |
|                                   |       | 3       | 97           | 86           | 11                      |              |              |      | 115                     | 94           | 21           |              |                         |       | 90           | 67           | 23                      |              |           | 85           | 61           | 24           |              |              |
| <b>2</b>                          |       | 1       | 95           | 63           | 32                      |              |              |      | 100                     | 84           | 16           |              |                         |       | 90           | 72           | 18                      |              |           | 94           | 70           | 24           |              |              |
|                                   |       | 2       | 95           | 64           | 31                      |              | <b>31.67</b> |      | 101                     | 83           | 18           |              | <b>16.33</b>            |       | 94           | 73           | 21                      |              |           | 96           | 70           | 26           |              | <b>25.67</b> |
|                                   |       | 3       | 97           | 65           | 32                      |              |              |      | 100                     | 85           | 15           |              |                         |       | 89           | 75           | 14                      |              |           | 96           | 69           | 27           |              |              |
| <b>3</b>                          |       | 1       | 94           | 83           | 11                      |              |              |      | 109                     | 93           | 16           |              |                         |       | 67           | 50           | 17                      |              |           | 63           | 55           | 8            |              |              |
|                                   |       | 2       | 90           | 82           | 8                       |              | <b>9.00</b>  |      | 106                     | 90           | 16           |              | <b>15.33</b>            |       | 66           | 51           | 15                      |              |           | 64           | 54           | 10           |              | <b>8.67</b>  |
|                                   |       | 3       | 92           | 84           | 8                       |              |              |      | 105                     | 91           | 14           |              |                         |       | 67           | 53           | 14                      |              |           | 63           | 55           | 8            |              |              |
| <b>4</b>                          |       | 1       | 90           | 83           | 7                       |              |              |      | 101                     | 72           | 29           |              |                         |       | 77           | 55           | 22                      |              |           | 78           | 70           | 8            |              |              |
|                                   |       | 2       | 95           | 86           | 9                       |              | <b>9.00</b>  |      | 102                     | 72           | 30           |              | <b>29.67</b>            |       | 78           | 55           | 23                      |              |           | 77           | 70           | 7            |              | <b>7.67</b>  |
|                                   |       | 3       | 94           | 83           | 11                      |              |              |      | 103                     | 73           | 30           |              |                         |       | 78           | 56           | 22                      |              |           | 79           | 71           | 8            |              |              |
| <b>5</b>                          |       | 1       | 88           | 77           | 11                      |              |              |      | 103                     | 79           | 24           |              |                         |       | 95           | 62           | 33                      |              |           | 82           | 69           | 13           |              |              |
|                                   |       | 2       | 91           | 80           | 11                      |              | <b>13.67</b> |      | 104                     | 77           | 27           |              | <b>27.67</b>            |       | 95           | 63           | 32                      |              |           | 82           | 69           | 13           |              | <b>13.00</b> |
|                                   |       | 3       | 91           | 72           | 19                      |              |              |      | 106                     | 74           | 32           |              |                         |       | 98           | 62           | 36                      |              |           | 83           | 70           | 13           |              |              |
| <b>6</b>                          |       | 1       | 103          | 92           | 11                      |              |              |      | 97                      | 74           | 23           |              |                         |       | 89           | 60           | 29                      |              |           | 89           | 59           | 30           |              |              |
|                                   |       | 2       | 106          | 97           | 9                       |              | <b>12.33</b> |      | 99                      | 79           | 20           |              | <b>21.33</b>            |       | 95           | 63           | 32                      |              |           | 88           | 60           | 28           |              | <b>28.67</b> |
|                                   |       | 3       | 106          | 89           | 9                       |              |              |      | 97                      | 76           | 21           |              |                         |       | 90           | 62           | 28                      |              |           | 87           | 59           | 28           |              |              |
| <b>7</b>                          |       | 1       | 86           | 79           | 7                       |              |              |      | 97                      | 81           | 16           |              |                         |       | 77           | 71           | 6                       |              |           | 96           | 79           | 17           |              |              |
|                                   |       | 2       | 86           | 79           | 7                       |              | <b>7.00</b>  |      | 97                      | 82           | 15           |              | <b>14.67</b>            |       | 79           | 72           | 7                       |              |           | 94           | 80           | 14           |              |              |
|                                   |       | 3       | 86           | 79           | 7                       |              |              |      | 92                      | 79           | 13           |              |                         |       | 80           | 71           | 9                       |              |           | 94           | 80           | 14           |              | <b>15.00</b> |
| <b>8</b>                          |       | 1       | 81           | 61           | 20                      |              |              |      | 87                      | 70           | 17           |              |                         |       | 73           | 58           | 15                      |              |           | 83           | 50           | 33           |              |              |
|                                   |       | 2       | 80           | 60           | 20                      |              | <b>21.00</b> |      | 87                      | 72           | 15           |              | <b>16.00</b>            |       | 72           | 58           | 14                      |              |           | 83           | 51           | 32           |              | <b>32.00</b> |
|                                   |       | 3       | 85           | 62           | 23                      |              |              |      | 87                      | 71           | 16           |              |                         |       | 75           | 57           | 18                      |              |           | 82           | 51           | 31           |              |              |
| <b>9</b>                          |       | 1       | 81           | 73           | 8                       |              |              |      | 94                      | 80           | 14           |              |                         |       | 89           | 58           | 31                      |              |           | 88           | 53           | 35           |              |              |
|                                   |       | 2       | 81           | 72           | 9                       |              | <b>8.00</b>  |      | 92                      | 81           | 11           |              | <b>11.67</b>            |       | 88           | 59           | 29                      |              |           | 88           | 53           | 35           |              | <b>34.00</b> |
|                                   |       | 3       | 81           | 74           | 7                       |              |              |      | 92                      | 82           | 10           |              |                         |       | 87           | 60           | 27                      |              |           | 85           | 53           | 32           |              |              |
| <b>10</b>                         |       | 1       | 96           | 82           | 14                      |              |              |      | 92                      | 77           | 15           |              |                         |       | 91           | 70           | 21                      |              |           | 87           | 59           | 28           |              |              |
|                                   |       | 2       | 96           | 82           | 14                      |              | <b>14.67</b> |      | 93                      | 78           | 15           |              | <b>15.00</b>            |       | 91           | 71           | 20                      |              |           | 86           | 60           | 26           |              | <b>26.33</b> |
|                                   |       | 3       | 93           | 77           | 16                      |              |              |      | 94                      | 79           | 15           |              |                         |       | 90           | 69           | 21                      |              |           | 87           | 62           | 25           |              |              |
| <b>Mean</b>                       |       |         | <b>91.83</b> | <b>78.00</b> | <b>13.83</b>            | <b>13.83</b> |              |      | <b>99.20</b>            | <b>80.43</b> | <b>18.77</b> | <b>18.77</b> |                         |       | <b>84.37</b> | <b>62.77</b> | <b>21.60</b>            | <b>21.60</b> |           | <b>84.20</b> | <b>62.67</b> | <b>21.53</b> | <b>21.53</b> |              |
| <b>SE</b>                         |       |         | <b>1.34</b>  | <b>1.76</b>  | <b>1.36</b>             | <b>1.36</b>  |              |      | <b>1.37</b>             | <b>1.31</b>  | <b>1.07</b>  | <b>1.86</b>  |                         |       | <b>1.71</b>  | <b>1.29</b>  | <b>1.43</b>             | <b>2.52</b>  |           | <b>1.61</b>  | <b>1.63</b>  | <b>1.71</b>  | <b>3.05</b>  |              |

| Group 4<br>Cmpd B<br>IA, 1x/week |       | Trial # | Force (g)    |              | Paw Wt Distribution (g) |              | Force (g)    |      | Paw Wt Distribution (g) |              | Force (g)    |              | Paw Wt Distribution (g) |       | Force (g)    |              | Paw Wt Distribution (g) |              |           |              |             |    |  |              |
|----------------------------------|-------|---------|--------------|--------------|-------------------------|--------------|--------------|------|-------------------------|--------------|--------------|--------------|-------------------------|-------|--------------|--------------|-------------------------|--------------|-----------|--------------|-------------|----|--|--------------|
| Left                             | Right |         | Per Trial    | Mean         | Left                    | Right        | Per Trial    | Mean | Left                    | Right        | Per Trial    | Mean         | Left                    | Right | Per Trial    | Mean         | Left                    | Right        | Per Trial | Mean         |             |    |  |              |
| <b>Animal 1</b>                  |       | 1       | 76           | 70           | 6                       |              |              |      | 91                      | 68           | 23           |              |                         |       | 81           | 69           | 12                      |              |           | 74           | 43          | 31 |  |              |
|                                  |       | 2       | 76           | 70           | 6                       |              | <b>6.33</b>  |      | 91                      | 69           | 22           |              | <b>22.67</b>            |       | 80           | 67           | 13                      |              |           | 72           | 47          | 25 |  | <b>27.33</b> |
|                                  |       | 3       | 77           | 70           | 7                       |              |              |      | 91                      | 68           | 23           |              |                         |       | 76           | 66           | 10                      |              |           | 73           | 47          | 26 |  |              |
| <b>2</b>                         |       | 1       | 83           | 67           | 16                      |              |              |      | 83                      | 76           | 7            |              |                         |       | 75           | 51           | 24                      |              |           | 95           | 68          | 27 |  |              |
|                                  |       | 2       | 86           | 70           | 16                      |              | <b>15.33</b> |      | 84                      | 78           | 6            |              | <b>5.33</b>             |       | 74           | 51           | 23                      |              |           | 95           | 68          | 27 |  | <b>27.00</b> |
|                                  |       | 3       | 83           | 69           | 14                      |              |              |      | 80                      | 77           | 3            |              |                         |       | 75           | 51           | 24                      |              |           | 96           | 69          | 27 |  |              |
| <b>3</b>                         |       | 1       | 81           | 54           | 27                      |              |              |      | 92                      | 72           | 20           |              |                         |       | 74           | 59           | 15                      |              |           | 79           | 50          | 29 |  |              |
|                                  |       | 2       | 81           | 51           | 30                      |              | <b>28.33</b> |      | 91                      | 71           | 20           |              | <b>20.33</b>            |       | 70           | 62           | 8                       |              |           | 80           | 50          | 30 |  | <b>29.67</b> |
|                                  |       | 3       | 81           | 53           | 28                      |              |              |      | 91                      | 70           | 21           |              |                         |       | 74           | 67           | 7                       |              |           | 79           | 49          | 30 |  |              |
| <b>4</b>                         |       | 1       | 86           | 71           | 15                      |              |              |      | 82                      | 55           | 27           |              |                         |       | 83           | 49           | 34                      |              |           | 78           | 47          | 31 |  |              |
|                                  |       | 2       | 87           | 71           | 16                      |              | <b>15.67</b> |      | 84                      | 56           | 28           |              | <b>26.67</b>            |       | 83           | 48           | 35                      |              |           | 78           | 49          | 29 |  | <b>29.33</b> |
|                                  |       | 3       | 87           | 71           | 16                      |              |              |      | 82                      | 57           | 25           |              |                         |       | 85           | 47           | 38                      |              |           | 78           | 50          | 28 |  |              |
| <b>5</b>                         |       | 1       | 65           | 51           | 14                      |              |              |      | 87                      | 75           | 12           |              |                         |       | 64           | 52           | 12                      |              |           | 74           | 65          | 9  |  |              |
|                                  |       | 2       | 67           | 55           | 12                      |              | <b>10.33</b> |      | 88                      | 76           | 12           |              | <b>12.33</b>            |       | 64           | 52           | 12                      |              |           | 74           | 65          | 9  |  | <b>9.33</b>  |
|                                  |       | 3       | 63           | 58           | 5                       |              |              |      | 87                      | 74           | 13           |              |                         |       | 62           | 53           | 9                       |              |           | 74           | 64          | 10 |  |              |
| <b>6</b>                         |       | 1       | 90           | 72           | 18                      |              |              |      | 83                      | 55           | 28           |              |                         |       | 73           | 66           | 7                       |              |           | 78           | 70          | 8  |  |              |
|                                  |       | 2       | 91           | 72           | 19                      |              | <b>18.67</b> |      | 83                      | 57           | 26           |              | <b>27.33</b>            |       | 72           | 57           | 15                      |              |           | 76           | 68          | 8  |  | <b>9.00</b>  |
|                                  |       | 3       | 92           | 73           | 19                      |              |              |      | 86                      | 58           | 28           |              |                         |       | 74           | 60           | 14                      |              |           | 78           | 67          | 11 |  |              |
| <b>7</b>                         |       | 1       | 84           | 65           | 19                      |              |              |      | 94                      | 86           | 8            |              |                         |       | 84           | 69           | 15                      |              |           | 73           | 54          | 19 |  |              |
|                                  |       | 2       | 83           | 64           | 19                      |              | <b>19.67</b> |      | 93                      | 86           | 7            |              | <b>7.33</b>             |       | 86           | 69           | 17                      |              |           | 73           | 54          | 19 |  | <b>19.00</b> |
|                                  |       | 3       | 85           | 64           | 21                      |              |              |      | 94                      | 87           | 7            |              |                         |       | 84           | 67           | 17                      |              |           | 74           | 55          | 19 |  |              |
| <b>8</b>                         |       | 1       | 57           | 56           | 1                       |              |              |      | 77                      | 68           | 9            |              |                         |       | 71           | 48           | 23                      |              |           | 75           | 60          | 15 |  |              |
|                                  |       | 2       | 58           | 57           | 1                       |              | <b>0.67</b>  |      | 78                      | 69           | 9            |              | <b>6.67</b>             |       | 68           | 46           | 22                      |              |           | 75           | 60          | 15 |  | <b>15.00</b> |
|                                  |       | 3       | 59           | 59           | 0                       |              |              |      | 78                      | 76           | 2            |              |                         |       | 78           | 49           | 29                      |              |           | 76           | 61          | 15 |  |              |
| <b>9</b>                         |       | 1       | 74           | 56           | 18                      |              |              |      | 82                      | 73           | 9            |              |                         |       | 76           | 44           | 32                      |              |           | 76           | 69          | 7  |  |              |
|                                  |       | 2       | 74           | 58           | 16                      |              | <b>16.00</b> |      | 83                      | 75           | 8            |              | <b>8.67</b>             |       | 73           | 45           | 28                      |              |           | 75           | 71          | 4  |  | <b>5.67</b>  |
|                                  |       | 3       | 73           | 59           | 14                      |              |              |      | 82                      | 73           | 9            |              |                         |       | 72           | 50           | 22                      |              |           | 75           | 69          | 6  |  |              |
| <b>10</b>                        |       | 1       | 73           | 71           | 2                       |              |              |      | 65                      | 52           | 13           |              |                         |       | 92           | 65           | 27                      |              |           | 76           | 66          | 10 |  |              |
|                                  |       | 2       | 75           | 68           | 7                       |              | <b>10.67</b> |      | 66                      | 50           | 16           |              | <b>15.67</b>            |       | 91           | 66           | 25                      |              |           | 78           | 66          | 12 |  | <b>13.67</b> |
|                                  |       | 3       | 88           | 65           | 23                      |              |              |      | 69                      | 51           | 18           |              |                         |       | 89           | 64           | 25                      |              |           | 81           | 62          | 19 |  |              |
| <b>Mean</b>                      |       |         | <b>77.83</b> | <b>63.67</b> | <b>14.17</b>            | <b>14.17</b> |              |      | <b>83.90</b>            | <b>68.60</b> | <b>15.30</b> | <b>15.30</b> |                         |       | <b>76.77</b> | <b>56.97</b> | <b>19.80</b>            | <b>19.80</b> |           | <b>77.93</b> | <b>59.4</b> |    |  |              |

| Group 5<br>Cmpd C1<br>IA, 1x/week |  | Trial # | Force (g) |       | Paw Wt Distribution (g) |       | Force (g) |       | Paw Wt Distribution (g) |       | Force (g) |       | Paw Wt Distribution (g) |       | Force (g) |       | Paw Wt Distribution (g) |       |
|-----------------------------------|--|---------|-----------|-------|-------------------------|-------|-----------|-------|-------------------------|-------|-----------|-------|-------------------------|-------|-----------|-------|-------------------------|-------|
|                                   |  |         | Left      | Right | Per Trial               | Mean  | Left      | Right | Per Trial               | Mean  | Left      | Right | Per Trial               | Mean  | Left      | Right | Per Trial               | Mean  |
| Animal 1                          |  | 1       | 85        | 61    | 24                      | 17.00 | 85        | 65    | 20                      | 18.33 | 65        | 55    | 10                      | 9.33  | 72        | 52    | 20                      | 18.67 |
|                                   |  | 2       | 81        | 68    | 13                      |       | 84        | 66    | 18                      |       | 66        | 56    | 10                      |       | 70        | 52    | 18                      |       |
|                                   |  | 3       | 83        | 69    | 14                      |       | 86        | 69    | 17                      |       | 66        | 58    | 8                       |       | 72        | 54    | 18                      |       |
| 2                                 |  | 1       | 106       | 89    | 17                      | 16.33 | 96        | 82    | 14                      | 10.00 | 89        | 75    | 14                      | 12.67 | 106       | 86    | 20                      | 20.00 |
|                                   |  | 2       | 105       | 89    | 16                      |       | 90        | 84    | 6                       |       | 85        | 76    | 9                       |       | 107       | 89    | 18                      |       |
|                                   |  | 3       | 106       | 90    | 16                      |       | 95        | 85    | 10                      |       | 91        | 76    | 15                      |       | 109       | 87    | 22                      |       |
| 3                                 |  | 1       | 92        | 80    | 12                      | 11.00 | 94        | 73    | 21                      | 21.33 | 86        | 52    | 34                      | 32.33 | 87        | 59    | 28                      | 29.33 |
|                                   |  | 2       | 91        | 80    | 11                      |       | 93        | 73    | 20                      |       | 83        | 54    | 29                      |       | 88        | 56    | 32                      |       |
|                                   |  | 3       | 89        | 79    | 10                      |       | 93        | 70    | 23                      |       | 85        | 51    | 34                      |       | 86        | 58    | 28                      |       |
| 4                                 |  | 1       | 97        | 74    | 23                      | 18.67 | 92        | 71    | 21                      | 21.67 | 90        | 68    | 22                      | 23.67 | 66        | 57    | 9                       | 10.00 |
|                                   |  | 2       | 93        | 76    | 17                      |       | 92        | 71    | 21                      |       | 89        | 69    | 20                      |       | 66        | 56    | 10                      |       |
|                                   |  | 3       | 94        | 78    | 16                      |       | 95        | 72    | 23                      |       | 94        | 65    | 29                      |       | 68        | 57    | 11                      |       |
| 5                                 |  | 1       | 94        | 76    | 18                      | 20.33 | 82        | 69    | 13                      | 13.33 | 81        | 67    | 14                      | 14.33 | 85        | 62    | 23                      | 19.00 |
|                                   |  | 2       | 95        | 76    | 19                      |       | 80        | 67    | 13                      |       | 80        | 67    | 13                      |       | 83        | 66    | 17                      |       |
|                                   |  | 3       | 95        | 71    | 24                      |       | 81        | 67    | 14                      |       | 82        | 66    | 16                      |       | 83        | 66    | 17                      |       |
| 6                                 |  | 1       | 99        | 87    | 12                      | 10.00 | 90        | 68    | 22                      | 22.33 | 81        | 58    | 23                      | 22.33 | 94        | 67    | 27                      | 26.00 |
|                                   |  | 2       | 97        | 87    | 10                      |       | 90        | 67    | 23                      |       | 81        | 59    | 22                      |       | 93        | 67    | 26                      |       |
|                                   |  | 3       | 97        | 89    | 8                       |       | 90        | 68    | 22                      |       | 82        | 60    | 22                      |       | 92        | 67    | 25                      |       |
| 7                                 |  | 1       | 105       | 80    | 25                      | 22.33 | 89        | 74    | 15                      | 14.33 | 79        | 64    | 15                      | 14.67 | 89        | 58    | 31                      | 30.33 |
|                                   |  | 2       | 103       | 81    | 22                      |       | 89        | 76    | 13                      |       | 78        | 64    | 14                      |       | 89        | 59    | 30                      |       |
|                                   |  | 3       | 102       | 82    | 20                      |       | 89        | 74    | 15                      |       | 77        | 62    | 15                      |       | 89        | 59    | 30                      |       |
| 8                                 |  | 1       | 107       | 81    | 26                      | 24.00 | 73        | 61    | 12                      | 11.33 | 78        | 66    | 12                      | 11.33 | 66        | 61    | 5                       | 4.00  |
|                                   |  | 2       | 108       | 83    | 25                      |       | 73        | 62    | 11                      |       | 78        | 67    | 11                      |       | 65        | 61    | 4                       |       |
|                                   |  | 3       | 106       | 85    | 21                      |       | 73        | 62    | 11                      |       | 79        | 68    | 11                      |       | 66        | 63    | 3                       |       |
| 9                                 |  | 1       | 104       | 80    | 24                      | 26.33 | 86        | 74    | 12                      | 11.67 | 99        | 72    | 27                      | 23.00 | 76        | 61    | 15                      | 16.67 |
|                                   |  | 2       | 105       | 79    | 26                      |       | 87        | 74    | 13                      |       | 98        | 75    | 23                      |       | 79        | 61    | 18                      |       |
|                                   |  | 3       | 108       | 79    | 29                      |       | 85        | 75    | 10                      |       | 94        | 75    | 19                      |       | 78        | 61    | 17                      |       |
| 10                                |  | 1       | 89        | 68    | 21                      | 24.67 | 79        | 67    | 12                      | 11.00 | 87        | 57    | 30                      | 29.67 | 78        | 67    | 11                      | 11.00 |
|                                   |  | 2       | 87        | 60    | 27                      |       | 78        | 69    | 9                       |       | 86        | 56    | 30                      |       | 78        | 68    | 10                      |       |
|                                   |  | 3       | 89        | 63    | 26                      |       | 81        | 69    | 12                      |       | 86        | 57    | 29                      |       | 79        | 67    | 12                      |       |
| Mean                              |  |         | 97.07     | 78.00 | 19.07                   | 19.07 | 86.33     | 70.80 | 15.53                   | 15.53 | 83.17     | 63.83 | 19.33                   | 19.33 | 81.97     | 63.47 | 18.50                   | 18.50 |
| SE                                |  |         | 1.47      | 1.51  | 1.09                    | 1.76  | 1.23      | 1.07  | 0.90                    | 1.55  | 1.53      | 1.37  | 1.45                    | 2.52  | 2.27      | 1.70  | 1.53                    | 2.70  |

| Group 6<br>Cmpd C2<br>IA, 1x/week |  | Trial # | Force (g) |       | Paw Wt Distribution (g) |       | Force (g) |       | Paw Wt Distribution (g) |       | Force (g) |       | Paw Wt Distribution (g) |       | Force (g) |       | Paw Wt Distribution (g) |       |
|-----------------------------------|--|---------|-----------|-------|-------------------------|-------|-----------|-------|-------------------------|-------|-----------|-------|-------------------------|-------|-----------|-------|-------------------------|-------|
|                                   |  |         | Left      | Right | Per Trial               | Mean  | Left      | Right | Per Trial               | Mean  | Left      | Right | Per Trial               | Mean  | Left      | Right | Per Trial               | Mean  |
| Animal 1                          |  | 1       | 91        | 76    | 15                      | 15.33 | 89        | 75    | 14                      | 13.00 | 73        | 58    | 15                      | 14.00 | 78        | 50    | 28                      | 27.00 |
|                                   |  | 2       | 91        | 76    | 15                      |       | 89        | 79    | 10                      |       | 71        | 58    | 13                      |       | 78        | 51    | 27                      |       |
|                                   |  | 3       | 92        | 76    | 16                      |       | 90        | 75    | 15                      |       | 73        | 59    | 14                      |       | 77        | 51    | 26                      |       |
| 2                                 |  | 1       | 97        | 89    | 8                       | 7.33  | 90        | 65    | 25                      | 26.33 | 94        | 66    | 28                      | 29.00 | 91        | 63    | 28                      | 25.33 |
|                                   |  | 2       | 95        | 88    | 7                       |       | 90        | 64    | 26                      |       | 92        | 64    | 28                      |       | 90        | 64    | 26                      |       |
|                                   |  | 3       | 98        | 91    | 7                       |       | 91        | 63    | 28                      |       | 95        | 64    | 31                      |       | 88        | 66    | 22                      |       |
| 3                                 |  | 1       | 87        | 64    | 23                      | 21.33 | 74        | 66    | 8                       | 7.67  | 72        | 57    | 15                      | 14.33 | 64        | 54    | 10                      | 8.33  |
|                                   |  | 2       | 86        | 67    | 19                      |       | 74        | 66    | 8                       |       | 71        | 58    | 13                      |       | 62        | 55    | 7                       |       |
|                                   |  | 3       | 87        | 65    | 22                      |       | 74        | 67    | 7                       |       | 73        | 58    | 15                      |       | 63        | 55    | 8                       |       |
| 4                                 |  | 1       | 93        | 81    | 12                      | 12.67 | 86        | 75    | 11                      | 10.67 | 75        | 54    | 21                      | 20.67 | 83        | 73    | 10                      | 10.33 |
|                                   |  | 2       | 94        | 81    | 13                      |       | 84        | 73    | 11                      |       | 73        | 53    | 20                      |       | 82        | 72    | 10                      |       |
|                                   |  | 3       | 92        | 79    | 13                      |       | 88        | 78    | 10                      |       | 74        | 53    | 21                      |       | 83        | 72    | 11                      |       |
| 5                                 |  | 1       | 95        | 82    | 13                      | 10.33 | 92        | 74    | 18                      | 15.67 | 87        | 58    | 29                      | 28.00 | 83        | 59    | 24                      | 24.00 |
|                                   |  | 2       | 90        | 83    | 7                       |       | 89        | 75    | 14                      |       | 88        | 60    | 28                      |       | 82        | 58    | 24                      |       |
|                                   |  | 3       | 98        | 87    | 11                      |       | 90        | 75    | 15                      |       | 88        | 61    | 27                      |       | 83        | 59    | 24                      |       |
| 6                                 |  | 1       | 74        | 50    | 24                      | 21.67 | 74        | 68    | 6                       | 7.67  | 81        | 62    | 19                      | 20.00 | 84        | 63    | 21                      | 20.33 |
|                                   |  | 2       | 74        | 55    | 19                      |       | 74        | 66    | 8                       |       | 82        | 59    | 23                      |       | 85        | 65    | 20                      |       |
|                                   |  | 3       | 76        | 54    | 22                      |       | 74        | 65    | 9                       |       | 81        | 63    | 18                      |       | 82        | 62    | 20                      |       |
| 7                                 |  | 1       | 86        | 77    | 9                       | 8.33  | 81        | 71    | 10                      | 8.33  | 78        | 54    | 24                      | 23.67 | 88        | 62    | 26                      | 25.67 |
|                                   |  | 2       | 87        | 79    | 8                       |       | 79        | 71    | 8                       |       | 78        | 55    | 23                      |       | 88        | 62    | 26                      |       |
|                                   |  | 3       | 86        | 78    | 8                       |       | 79        | 72    | 7                       |       | 79        | 55    | 24                      |       | 87        | 62    | 25                      |       |
| 8                                 |  | 1       | 68        | 65    | 3                       | 5.67  | 79        | 68    | 11                      | 8.67  | 66        | 45    | 21                      | 22.00 | 51        | 42    | 9                       | 7.67  |
|                                   |  | 2       | 71        | 63    | 8                       |       | 77        | 70    | 7                       |       | 69        | 46    | 23                      |       | 51        | 41    | 10                      |       |
|                                   |  | 3       | 72        | 66    | 6                       |       | 79        | 71    | 8                       |       | 69        | 47    | 22                      |       | 50        | 46    | 4                       |       |
| 9                                 |  | 1       | 105       | 67    | 38                      | 37.67 | 104       | 72    | 32                      | 31.00 | 94        | 68    | 26                      | 27.67 | 71        | 61    | 10                      | 10.00 |
|                                   |  | 2       | 102       | 66    | 36                      |       | 104       | 73    | 31                      |       | 98        | 69    | 29                      |       | 73        | 63    | 10                      |       |
|                                   |  | 3       | 107       | 68    | 39                      |       | 104       | 74    | 30                      |       | 98        | 70    | 28                      |       | 72        | 62    | 10                      |       |
| 10                                |  | 1       | 90        | 80    | 10                      | 7.00  | 76        | 54    | 22                      | 21.67 | 77        | 66    | 11                      | 8.67  | 79        | 58    | 21                      | 20.67 |
|                                   |  | 2       | 88        | 80    | 8                       |       | 78        | 56    | 22                      |       | 74        | 69    | 5                       |       | 79        | 59    | 20                      |       |
|                                   |  | 3       | 87        | 84    | 3                       |       | 78        | 57    | 21                      |       | 78        | 68    | 10                      |       | 79        | 58    | 21                      |       |
| Mean                              |  |         | 88.63     | 73.90 | 14.73                   | 14.73 | 84.33     | 69.27 | 15.07                   | 15.07 | 80.03     | 59.23 | 20.80                   | 20.80 | 76.87     | 58.93 | 17.93                   | 17.93 |
| SE                                |  |         | 1.80      | 1.97  | 1.77                    | 3.13  | 1.68      | 1.14  | 1.51                    | 2.68  | 1.72      | 1.24  | 1.22                    | 2.14  | 2.12      | 1.44  | 1.42                    | 2.51  |



| Group 7<br>Cmpd D<br>IA, 1x/week | Trial # | Force (g) |       | Paw Wt Distribution (g) |       | Force (g) |       | Paw Wt Distribution (g) |       | Force (g)                      |       | Paw Wt Distribution (g) |       | Force (g) |       | Paw Wt Distribution (g) |       |
|----------------------------------|---------|-----------|-------|-------------------------|-------|-----------|-------|-------------------------|-------|--------------------------------|-------|-------------------------|-------|-----------|-------|-------------------------|-------|
|                                  |         | Left      | Right | Per Trial               | Mean  | Left      | Right | Per Trial               | Mean  | Left                           | Right | Per Trial               | Mean  | Left      | Right | Per Trial               | Mean  |
|                                  |         | Animal 1  | 1     | 98                      | 81    | 17        |       | 103                     | 81    | 22                             |       | 93                      | 66    | 27        |       | 79                      | 64    |
|                                  | 2       | 98        | 82    | 16                      | 15.33 | 101       | 80    | 21                      | 21.00 | 96                             | 68    | 28                      | 27.67 | 78        | 63    | 15                      | 14.33 |
|                                  | 3       | 95        | 82    | 13                      |       | 101       | 81    | 20                      |       | 93                             | 65    | 28                      |       | 78        | 65    | 13                      |       |
|                                  |         |           |       |                         |       |           |       |                         |       | *showing slight pain in Sx leg |       |                         |       |           |       |                         |       |
| 2                                | 1       | 101       | 95    | 6                       | 5.00  | 100       | 93    | 7                       | 6.67  | 88                             | 84    | 4                       | 3.33  | 81        | 70    | 11                      |       |
|                                  | 2       | 102       | 96    | 6                       |       | 100       | 93    | 7                       |       | 90                             | 86    | 4                       |       | 80        | 70    | 10                      | 9.67  |
|                                  | 3       | 100       | 97    | 3                       |       | 99        | 93    | 6                       |       | 88                             | 86    | 2                       |       | 80        | 72    | 8                       |       |
| 3                                | 1       | 97        | 86    | 11                      | 10.33 | 80        | 61    | 19                      | 20.00 | 90                             | 74    | 16                      | 20.67 | 83        | 61    | 22                      | 21.67 |
|                                  | 2       | 96        | 87    | 9                       |       | 81        | 61    | 20                      |       | 92                             | 71    | 21                      |       | 84        | 61    | 23                      |       |
|                                  | 3       | 95        | 84    | 11                      |       | 83        | 62    | 21                      |       | 95                             | 70    | 25                      |       | 82        | 62    | 20                      |       |
| 4                                | 1       | 88        | 73    | 15                      | 12.67 | 88        | 79    | 9                       | 8.67  | 84                             | 72    | 12                      | 10.33 | 70        | 67    | 3                       | 3.33  |
|                                  | 2       | 88        | 75    | 13                      |       | 95        | 80    | 15                      |       | 83                             | 75    | 8                       |       | 70        | 67    | 3                       |       |
|                                  | 3       | 89        | 79    | 10                      |       | 88        | 86    | 2                       |       | 82                             | 71    | 11                      |       | 69        | 65    | 4                       |       |
| 5                                | 1       | 102       | 81    | 21                      | 22.67 | 87        | 73    | 14                      | 13.00 | 82                             | 61    | 21                      | 22.00 | 87        | 69    | 18                      | 18.33 |
|                                  | 2       | 104       | 82    | 22                      |       | 87        | 74    | 13                      |       | 84                             | 60    | 24                      |       | 89        | 70    | 19                      |       |
|                                  | 3       | 105       | 80    | 25                      |       | 87        | 75    | 12                      |       | 84                             | 63    | 21                      |       | 88        | 70    | 18                      |       |
|                                  |         |           |       |                         |       |           |       |                         |       | *showing slight pain in Sx leg |       |                         |       |           |       |                         |       |
| 6                                | 1       | 104       | 89    | 15                      | 19.00 | 82        | 61    | 21                      | 23.00 | 84                             | 54    | 30                      | 31.00 | 76        | 54    | 22                      | 20.67 |
|                                  | 2       | 106       | 89    | 17                      |       | 89        | 66    | 23                      |       | 87                             | 54    | 33                      |       | 77        | 57    | 20                      |       |
|                                  | 3       | 107       | 82    | 25                      |       | 87        | 62    | 25                      |       | 84                             | 54    | 30                      |       | 75        | 55    | 20                      |       |
|                                  |         |           |       |                         |       |           |       |                         |       | *showing slight pain in Sx leg |       |                         |       |           |       |                         |       |
| 7                                | 1       | 100       | 82    | 18                      | 16.33 | 97        | 78    | 19                      | 19.67 | 80                             | 65    | 15                      | 14.00 | 77        | 57    | 20                      | 18.67 |
|                                  | 2       | 99        | 86    | 13                      |       | 96        | 75    | 21                      |       | 80                             | 67    | 13                      |       | 76        | 58    | 18                      |       |
|                                  | 3       | 102       | 84    | 18                      |       | 96        | 77    | 19                      |       | 82                             | 68    | 14                      |       | 77        | 59    | 18                      |       |
|                                  |         |           |       |                         |       |           |       |                         |       | *showing slight pain in Sx leg |       |                         |       |           |       |                         |       |
| 8                                | 1       | 88        | 77    | 11                      | 11.67 | 78        | 64    | 14                      | 13.67 | 56                             | 50    | 6                       | 5.33  | 63        | 54    | 9                       | 8.00  |
|                                  | 2       | 89        | 76    | 13                      |       | 77        | 64    | 13                      |       | 56                             | 50    | 6                       |       | 62        | 55    | 7                       |       |
|                                  | 3       | 88        | 77    | 11                      |       | 77        | 63    | 14                      |       | 55                             | 51    | 4                       |       | 63        | 55    | 8                       |       |
| 9                                | 1       | 107       | 81    | 26                      | 26.00 | 87        | 59    | 28                      | 30.33 | 72                             | 65    | 7                       | 7.67  | 76        | 56    | 20                      | 20.67 |
|                                  | 2       | 107       | 81    | 26                      |       | 90        | 58    | 32                      |       | 72                             | 64    | 8                       |       | 78        | 58    | 20                      |       |
|                                  | 3       | 105       | 79    | 26                      |       | 90        | 59    | 31                      |       | 72                             | 64    | 8                       |       | 76        | 54    | 22                      |       |
| 10                               | 1       | 90        | 73    | 17                      | 14.00 | 91        | 71    | 20                      | 20.33 | 69                             | 55    | 14                      | 16.00 | 78        | 64    | 14                      | 13.67 |
|                                  | 2       | 85        | 73    | 12                      |       | 93        | 72    | 21                      |       | 69                             | 56    | 13                      |       | 78        | 65    | 13                      |       |
|                                  | 3       | 87        | 74    | 13                      |       | 90        | 70    | 20                      |       | 74                             | 53    | 21                      |       | 77        | 63    | 14                      |       |
| Mean                             |         | 97.40     | 82.10 | 15.30                   | 15.30 | 90.00     | 72.37 | 17.63                   | 17.63 | 80.53                          | 64.73 | 15.80                   | 15.80 | 76.90     | 62.00 | 14.90                   | 14.90 |
| SE                               |         | 1.30      | 1.18  | 1.14                    | 1.93  | 1.39      | 1.94  | 1.30                    | 2.25  | 2.06                           | 1.85  | 1.70                    | 2.98  | 1.22      | 1.05  | 1.11                    | 1.97  |

| Group 8<br>Cmpd E<br>IA, 1x/week | Trial # | Force (g) |       | Paw Wt Distribution (g) |       | Force (g) |       | Paw Wt Distribution (g) |       | Force (g)                      |       | Paw Wt Distribution (g) |       | Force (g) |       | Paw Wt Distribution (g) |       |
|----------------------------------|---------|-----------|-------|-------------------------|-------|-----------|-------|-------------------------|-------|--------------------------------|-------|-------------------------|-------|-----------|-------|-------------------------|-------|
|                                  |         | Left      | Right | Per Trial               | Mean  | Left      | Right | Per Trial               | Mean  | Left                           | Right | Per Trial               | Mean  | Left      | Right | Per Trial               | Mean  |
|                                  |         | Animal 1  | 1     | 109                     | 91    | 18        | 15.00 | 94                      | 69    | 25                             | 25.33 | 77                      | 52    | 25        | 21.33 | 71                      | 41    |
|                                  | 2       | 106       | 90    | 16                      |       | 94        | 69    | 25                      |       | 75                             | 56    | 19                      |       | 69        | 43    | 26                      |       |
|                                  | 3       | 103       | 92    | 11                      |       | 95        | 69    | 26                      |       | 77                             | 57    | 20                      |       | 70        | 45    | 25                      |       |
|                                  |         |           |       |                         |       |           |       |                         |       | *pain increasing               |       |                         |       |           |       |                         |       |
| 2                                | 1       | 99        | 69    | 30                      | 31.00 | 95        | 66    | 29                      | 28.00 | 70                             | 62    | 8                       | 9.33  | 84        | 52    | 32                      | 29.33 |
|                                  | 2       | 101       | 71    | 30                      |       | 96        | 69    | 27                      |       | 75                             | 63    | 12                      |       | 85        | 55    | 30                      |       |
|                                  | 3       | 101       | 68    | 33                      |       | 96        | 68    | 28                      |       | 71                             | 63    | 8                       |       | 84        | 58    | 26                      |       |
|                                  |         |           |       |                         |       |           |       |                         |       | *showing slight pain in Sx leg |       |                         |       |           |       |                         |       |
| 3                                | 1       | 86        | 75    | 11                      | 9.67  | 76        | 62    | 14                      | 12.00 | 84                             | 61    | 23                      | 21.00 | 81        | 56    | 25                      | 26.67 |
|                                  | 2       | 86        | 77    | 9                       |       | 76        | 64    | 12                      |       | 84                             | 64    | 20                      |       | 82        | 55    | 27                      |       |
|                                  | 3       | 85        | 76    | 9                       |       | 76        | 66    | 10                      |       | 83                             | 63    | 20                      |       | 83        | 55    | 28                      |       |
|                                  |         |           |       |                         |       |           |       |                         |       | *showing slight pain in Sx leg |       |                         |       |           |       |                         |       |
| 4                                | 1       | 104       | 95    | 9                       | 8.67  | 93        | 82    | 11                      | 14.00 | 94                             | 68    | 26                      | 26.33 | 77        | 46    | 31                      | 27.33 |
|                                  | 2       | 100       | 93    | 7                       |       | 92        | 78    | 14                      |       | 93                             | 66    | 27                      |       | 72        | 46    | 26                      |       |
|                                  | 3       | 102       | 92    | 10                      |       | 97        | 80    | 17                      |       | 93                             | 67    | 26                      |       | 73        | 48    | 25                      |       |
|                                  |         |           |       |                         |       |           |       |                         |       | *showing slight pain in Sx leg |       |                         |       |           |       |                         |       |
| 5                                | 1       | 109       | 90    | 19                      | 20.67 | 92        | 72    | 20                      | 21.00 | 86                             | 62    | 24                      | 21.67 | 73        | 55    | 18                      | 17.33 |
|                                  | 2       | 110       | 90    | 20                      |       | 93        | 72    | 21                      |       | 85                             | 64    | 21                      |       | 72        | 55    | 17                      |       |
|                                  | 3       | 114       | 91    | 23                      |       | 93        | 71    | 22                      |       | 84                             | 64    | 20                      |       | 74        | 57    | 17                      |       |
|                                  |         |           |       |                         |       |           |       |                         |       | *showing slight pain in Sx leg |       |                         |       |           |       |                         |       |
| 6                                | 1       | 83        | 62    | 21                      | 21.00 | 78        | 68    | 10                      | 8.00  | 84                             | 54    | 30                      | 29.00 | 67        | 52    | 15                      | 14.00 |
|                                  | 2       | 84        | 62    | 22                      |       | 78        | 69    | 9                       |       | 83                             | 53    | 30                      |       | 67        | 53    | 14                      |       |
|                                  | 3       | 82        | 62    | 20                      |       | 76        | 71    | 5                       |       | 82                             | 55    | 27                      |       | 66        | 53    | 13                      |       |
|                                  |         |           |       |                         |       |           |       |                         |       | *showing slight pain in Sx leg |       |                         |       |           |       |                         |       |
| 7                                | 1       | 86        | 82    | 4                       | 3.33  | 91        | 77    | 14                      | 10.33 | 78                             | 67    | 11                      | 10.00 | 83        | 69    | 14                      | 14.67 |
|                                  | 2       | 84        | 80    | 4                       |       | 86        | 77    | 9                       |       | 79                             | 70    | 9                       |       | 82        | 68    | 14                      |       |
|                                  | 3       | 85        | 83    | 2                       |       | 85        | 77    | 8                       |       | 78                             | 68    | 10                      |       | 83        | 67    | 16                      |       |
| 8                                | 1       | 74        | 58    | 16                      | 14.00 | 69        | 61    | 8                       | 7.67  | 78                             | 53    | 25                      | 22.33 | 83        | 66    | 17                      | 18.00 |
|                                  | 2       | 72        | 58    | 14                      |       | 70        | 63    | 7                       |       | 74                             | 52    | 22                      |       | 83        | 66    | 17                      |       |
|                                  | 3       | 71        | 59    | 12                      |       | 71        | 63    | 8                       |       | 74                             | 54    | 20                      |       | 82        | 62    | 20                      |       |
| 9                                | 1       | 71        | 65    | 6                       | 6.33  | 84        | 55    | 29                      | 30.67 | 72                             | 51    | 21                      | 22.33 | 88        | 69    | 19                      | 20.00 |
|                                  | 2       | 75        | 69    | 6                       |       | 84        | 55    | 29                      |       | 74                             | 50    | 24                      |       | 89        | 69    | 20                      |       |
|                                  | 3       | 77        | 70    | 7                       |       | 87        | 53    | 34                      |       | 72                             | 50    | 22                      |       | 89        | 68    | 21                      |       |
| 10                               | 1       | 90        | 68    | 22                      | 24.33 | 83        | 73    | 10                      | 13.00 | 73                             | 45    | 28                      | 31.33 | 66        | 45    | 21                      | 21.67 |
|                                  | 2       | 92        | 65    | 27                      |       | 83        | 67    | 16                      |       | 78                             | 43    | 35                      |       | 66        | 44    | 22                      |       |
|                                  | 3       | 90        | 66    | 24                      |       | 87        | 74    | 13                      |       | 75                             | 44    | 31                      |       | 68        | 46    | 22                      |       |
| Mean                             |         | 91.03     | 75.63 | 15.40                   | 15.40 | 85.67     | 68.67 | 17.00                   | 17.00 | 79.50                          | 58.03 | 21.47                   | 21.47 | 77.07     | 55.47 | 21.60                   | 21.60 |
| SE                               |         | 2.36      | 2.26  | 1.57                    | 2.77  | 1.58      | 1.32  | 1.54                    | 2.70  | 1.20                           | 1.41  | 1.30                    | 2.26  | 1.41      | 1.64  | 1.04                    | 1.79  |

1. Gerwin N, Bendele AM, Glasson S, Carlson CS. The OARSI histopathology initiative - recommendations for histological assessments of osteoarthritis in the rat. Osteoarthritis Cartilage 2010;18 Suppl 3(S24-34).
